# Supplementary material for: Modeling the public health impact of malaria vaccines for developers and policymakers
Source: BMC Infect Dis. 2013 Jul 1;13:295. doi: 10.1186/1471-2334-13-295 (PMC3711926; doi:10.1186/1471-2334-13-295)
Supplement: Additional file 9 — Vaccine_Strategy 5. Reference data from Swiss TPH on vaccine impact: Vaccine_Strategy 5. [file 1471-2334-13-295-S9.xls]

## Sheet: Vx Strategy 6
Vx Strategy:	6
Description:	Routine (Continuous) vaccination of Infants (no boost) PLUS a one-time (Catch-up) Campaign Vaccination of 5-17 month olds (no boost)
Scenario #	Type of Vaccine	Doses per Tx	Predicted Efficacy Against Clinical Disease	Vx Efficacy Decay Rate (yrs)	EIR	Routine (Continuous) Vaccination									Catch-up (Timed) Campaign Vaccination									Periodic (Timed) Campaign Vaccination									STI Output
						Cohort	Vx Schedule	Boost Dose Vx Schedule	Total Coverage	Dose by Dose Coverage					Cohort	Intervention Time	Boost Dose Vx Schedule	Total Coverage	Dose by Dose Coverage					Cohort	Intervention Time	Boost Dose Vx Schedule	Total Coverage	Dose by Dose Coverage					STI Observed Efficacy	Malaria Output	Year
										Dose #1	Dose #2	Dose #3	Dose #4	Boost Dose Compliance					Dose #1	Dose #2	Dose #3	Dose #4	Boost Dose Compliance					Dose #1	Dose #2	Dose #3	Dose #4	Boost Dose Compliance			1	2	3	4	5	6	7	8	9	10	11	12	13	14	15
1	PEV (Pre-Erythrocytic Vaccine)	3	0.35	2	0.1	Infants	6, 10, &, 14 weeks	None	0.893855	0.95	0.97	0.97	NA	NA	5-17mo	0 yrs	None	0.89	0.95	0.97	0.97	NA	NA	None	NA	NA	NA	NA	NA	NA	NA	NA	0.4	Cases per 100,000 population	8615.98	8527.55	8483.37	8422.85	8335.51	8370.54	8380.35	8263.22	8243.17	8302.19	8279.01	8233.92	8241.45	8194.18	8248.19
1	PEV (Pre-Erythrocytic Vaccine)	3	0.35	2	0.1	Infants	6, 10, &, 14 weeks	None	0.893855	0.95	0.97	0.97	NA	NA	5-17mo	0 yrs	None	0.89	0.95	0.97	0.97	NA	NA	None	NA	NA	NA	NA	NA	NA	NA	NA	0.4	Severe Cases per 100,000 population	149.082	146.836	145.8	143.209	141.709	144.882	144.336	142.791	143.682	142.155	140.282	143.209	142.018	142.991	145.427
1	PEV (Pre-Erythrocytic Vaccine)	3	0.35	2	0.1	Infants	6, 10, &, 14 weeks	None	0.893855	0.95	0.97	0.97	NA	NA	5-17mo	0 yrs	None	0.89	0.95	0.97	0.97	NA	NA	None	NA	NA	NA	NA	NA	NA	NA	NA	0.4	Deaths per 100,000 population	31.4636	30.1455	31.1636	29.7455	30.1636	29.2182	29.5182	29.6455	29.6091	30.0545	29.7545	29.6727	30.7091	30	30.2364
1	PEV (Pre-Erythrocytic Vaccine)	3	0.35	2	0.1	Infants	6, 10, &, 14 weeks	None	0.893855	0.95	0.97	0.97	NA	NA	5-17mo	0 yrs	None	0.89	0.95	0.97	0.97	NA	NA	None	NA	NA	NA	NA	NA	NA	NA	NA	0.4	Cases in <5yo per 100,000 population	663.255	619.673	597.873	578	579.473	573.445	573.409	565.573	567.582	564.518	565.691	564.773	565.991	559.309	561.073
1	PEV (Pre-Erythrocytic Vaccine)	3	0.35	2	0.1	Infants	6, 10, &, 14 weeks	None	0.893855	0.95	0.97	0.97	NA	NA	5-17mo	0 yrs	None	0.89	0.95	0.97	0.97	NA	NA	None	NA	NA	NA	NA	NA	NA	NA	NA	0.4	Severe Cases in <5yo per 100,000 population	34.2273	32.0182	31.1909	28.8273	29.7545	30.0909	29.7182	28.9455	29.4182	29.6364	27.9455	29.1727	28.6182	29.3545	29.6455
1	PEV (Pre-Erythrocytic Vaccine)	3	0.35	2	0.1	Infants	6, 10, &, 14 weeks	None	0.893855	0.95	0.97	0.97	NA	NA	5-17mo	0 yrs	None	0.89	0.95	0.97	0.97	NA	NA	None	NA	NA	NA	NA	NA	NA	NA	NA	0.4	Deaths in < 5yo per 100,000 population	7.87273	7.61818	8.17273	7.61818	7.38182	7.53636	7.25455	7.82727	7.23636	7.57273	7.44545	7.59091	7.67273	7.65455	7.56364
1	PEV (Pre-Erythrocytic Vaccine)	3	0.35	2	0.1	Infants	6, 10, &, 14 weeks	None	0.893855	0.95	0.97	0.97	NA	NA	5-17mo	0 yrs	None	0.89	0.95	0.97	0.97	NA	NA	None	NA	NA	NA	NA	NA	NA	NA	NA	0.4	DALYs per 100,000 population	799.129	768.565	791.446	759.85	764.262	746.689	753.61	757.825	753.303	767.821	757.374	760.568	776.035	763.536	766.135
1	PEV (Pre-Erythrocytic Vaccine)	3	0.35	2	0.1	Infants	6, 10, &, 14 weeks	None	0.893855	0.95	0.97	0.97	NA	NA	5-17mo	0 yrs	None	0.89	0.95	0.97	0.97	NA	NA	None	NA	NA	NA	NA	NA	NA	NA	NA	0.4	Income and productivity gains from delivering vaccine (US$ / dose)	-0.00351314	0.0112272	0.0206037	0.0337072	0.0548622	0.0433392	0.0413568	0.065187	0.0691315	0.0565923	0.062898	0.0725824	0.0731497	0.0804649	0.0675564
2	PEV (Pre-Erythrocytic Vaccine)	3	0.35	2	0.1	Infants	6, 10, &, 14 weeks	None	0.893855	0.95	0.97	0.97	NA	NA	5-17mo	0 yrs	None	0.7	0.81	0.93	0.93	NA	NA	None	NA	NA	NA	NA	NA	NA	NA	NA	0.4	Cases per 100,000 population	8585.85	8442.29	8423.23	8388.46	8351.63	8270.88	8294.79	8385.66	8295.58	8300.55	8308.8	8307.05	8262.71	8284.34	8295.35
2	PEV (Pre-Erythrocytic Vaccine)	3	0.35	2	0.1	Infants	6, 10, &, 14 weeks	None	0.893855	0.95	0.97	0.97	NA	NA	5-17mo	0 yrs	None	0.7	0.81	0.93	0.93	NA	NA	None	NA	NA	NA	NA	NA	NA	NA	NA	0.4	Severe Cases per 100,000 population	149.536	145.591	143.227	143.982	142.891	141.882	142.164	143.655	142.836	145.564	143.318	145.8	145.064	144.773	144.336
2	PEV (Pre-Erythrocytic Vaccine)	3	0.35	2	0.1	Infants	6, 10, &, 14 weeks	None	0.893855	0.95	0.97	0.97	NA	NA	5-17mo	0 yrs	None	0.7	0.81	0.93	0.93	NA	NA	None	NA	NA	NA	NA	NA	NA	NA	NA	0.4	Deaths per 100,000 population	30.6636	29.1727	30.5909	30.3818	29.9364	29.7727	29.2182	30.4909	30.1	30.2364	30.0909	30.7545	28.9818	30.3364	30.0909
2	PEV (Pre-Erythrocytic Vaccine)	3	0.35	2	0.1	Infants	6, 10, &, 14 weeks	None	0.893855	0.95	0.97	0.97	NA	NA	5-17mo	0 yrs	None	0.7	0.81	0.93	0.93	NA	NA	None	NA	NA	NA	NA	NA	NA	NA	NA	0.4	Cases in <5yo per 100,000 population	668.464	612.264	594.645	570.545	572.136	556.891	563.355	579.9	569.991	560.1	572.536	572.627	562	566.491	568.536
2	PEV (Pre-Erythrocytic Vaccine)	3	0.35	2	0.1	Infants	6, 10, &, 14 weeks	None	0.893855	0.95	0.97	0.97	NA	NA	5-17mo	0 yrs	None	0.7	0.81	0.93	0.93	NA	NA	None	NA	NA	NA	NA	NA	NA	NA	NA	0.4	Severe Cases in <5yo per 100,000 population	34.2455	31.4818	30.0273	30.4	28.8364	28.7545	28.7455	29.2545	29.7273	29.9273	29.6818	30.3818	30.1	29.4182	29.7636
2	PEV (Pre-Erythrocytic Vaccine)	3	0.35	2	0.1	Infants	6, 10, &, 14 weeks	None	0.893855	0.95	0.97	0.97	NA	NA	5-17mo	0 yrs	None	0.7	0.81	0.93	0.93	NA	NA	None	NA	NA	NA	NA	NA	NA	NA	NA	0.4	Deaths in < 5yo per 100,000 population	7.91818	7.23636	7.81818	8.02727	7.39091	7.45455	7.19091	7.44545	7.53636	7.48182	7.91818	8.00909	7.15455	7.52727	7.95455
2	PEV (Pre-Erythrocytic Vaccine)	3	0.35	2	0.1	Infants	6, 10, &, 14 weeks	None	0.893855	0.95	0.97	0.97	NA	NA	5-17mo	0 yrs	None	0.7	0.81	0.93	0.93	NA	NA	None	NA	NA	NA	NA	NA	NA	NA	NA	0.4	DALYs per 100,000 population	781.589	740.4	775.959	771.531	758.35	758.407	744.402	770.14	764.581	770.668	766.165	783.06	738.145	770.385	767.556
2	PEV (Pre-Erythrocytic Vaccine)	3	0.35	2	0.1	Infants	6, 10, &, 14 weeks	None	0.893855	0.95	0.97	0.97	NA	NA	5-17mo	0 yrs	None	0.7	0.81	0.93	0.93	NA	NA	None	NA	NA	NA	NA	NA	NA	NA	NA	0.4	Income and productivity gains from delivering vaccine (US$ / dose)	0.000446819	0.0305073	0.0348562	0.0405618	0.0498505	0.0660957	0.0606977	0.0383899	0.0580632	0.0542935	0.0565928	0.0565235	0.0653926	0.0595251	0.0577119
3	PEV (Pre-Erythrocytic Vaccine)	3	0.35	2	0.1	Infants	6, 10, &, 14 weeks	None	0.893855	0.95	0.97	0.97	NA	NA	5-17mo	0 yrs	None	0.5	0.69	0.85	0.85	NA	NA	None	NA	NA	NA	NA	NA	NA	NA	NA	0.4	Cases per 100,000 population	8577.7	8446.66	8370.44	8351.5	8314.09	8229.23	8302.99	8307.67	8319.75	8292.52	8331.38	8360.22	8315.25	8336.6	8360.92
3	PEV (Pre-Erythrocytic Vaccine)	3	0.35	2	0.1	Infants	6, 10, &, 14 weeks	None	0.893855	0.95	0.97	0.97	NA	NA	5-17mo	0 yrs	None	0.5	0.69	0.85	0.85	NA	NA	None	NA	NA	NA	NA	NA	NA	NA	NA	0.4	Severe Cases per 100,000 population	148.873	145.991	143.682	144.482	143.355	141	142.327	141.036	144.791	145.773	146.109	146.173	147.664	144.564	146.282
3	PEV (Pre-Erythrocytic Vaccine)	3	0.35	2	0.1	Infants	6, 10, &, 14 weeks	None	0.893855	0.95	0.97	0.97	NA	NA	5-17mo	0 yrs	None	0.5	0.69	0.85	0.85	NA	NA	None	NA	NA	NA	NA	NA	NA	NA	NA	0.4	Deaths per 100,000 population	30.7091	30.5727	30.2182	30.2273	29.6545	29.9182	29.0364	29.1545	30.3	30.6455	30.2636	29.8273	30.6	30.0636	30.4455
3	PEV (Pre-Erythrocytic Vaccine)	3	0.35	2	0.1	Infants	6, 10, &, 14 weeks	None	0.893855	0.95	0.97	0.97	NA	NA	5-17mo	0 yrs	None	0.5	0.69	0.85	0.85	NA	NA	None	NA	NA	NA	NA	NA	NA	NA	NA	0.4	Cases in <5yo per 100,000 population	666.064	616	585.764	574.991	571.909	562.127	565.127	572.664	567.082	562.309	573.173	574.082	568.9	567.7	572.1
3	PEV (Pre-Erythrocytic Vaccine)	3	0.35	2	0.1	Infants	6, 10, &, 14 weeks	None	0.893855	0.95	0.97	0.97	NA	NA	5-17mo	0 yrs	None	0.5	0.69	0.85	0.85	NA	NA	None	NA	NA	NA	NA	NA	NA	NA	NA	0.4	Severe Cases in <5yo per 100,000 population	34.2182	31.7273	30	29.9455	30.4182	28.0182	29.9364	28.1727	30.2273	29.8364	30.4909	30.7909	31.3182	29.4091	29.8545
3	PEV (Pre-Erythrocytic Vaccine)	3	0.35	2	0.1	Infants	6, 10, &, 14 weeks	None	0.893855	0.95	0.97	0.97	NA	NA	5-17mo	0 yrs	None	0.5	0.69	0.85	0.85	NA	NA	None	NA	NA	NA	NA	NA	NA	NA	NA	0.4	Deaths in < 5yo per 100,000 population	8.32727	7.79091	7.91818	7.88182	7.67273	7.27273	7.80909	7.96364	7.60909	7.24545	7.01818	7.62727	7.54545	7.32727	7.68182
3	PEV (Pre-Erythrocytic Vaccine)	3	0.35	2	0.1	Infants	6, 10, &, 14 weeks	None	0.893855	0.95	0.97	0.97	NA	NA	5-17mo	0 yrs	None	0.5	0.69	0.85	0.85	NA	NA	None	NA	NA	NA	NA	NA	NA	NA	NA	0.4	DALYs per 100,000 population	779.948	777.585	771.463	769.803	757.407	758.12	745.144	740.789	770.756	779.725	766.591	759.772	773.858	762.363	771.487
3	PEV (Pre-Erythrocytic Vaccine)	3	0.35	2	0.1	Infants	6, 10, &, 14 weeks	None	0.893855	0.95	0.97	0.97	NA	NA	5-17mo	0 yrs	None	0.5	0.69	0.85	0.85	NA	NA	None	NA	NA	NA	NA	NA	NA	NA	NA	0.4	Income and productivity gains from delivering vaccine (US$ / dose)	0.00173689	0.0309973	0.0454989	0.0480518	0.0575478	0.0758933	0.0584025	0.0584091	0.0502922	0.0566394	0.0502843	0.0428825	0.0540024	0.0490272	0.0438722
4	PEV (Pre-Erythrocytic Vaccine)	3	0.35	2	0.1	Infants	6, 10, &, 14 weeks	None	0.700569	0.81	0.93	0.93	NA	NA	5-17mo	0 yrs	None	0.89	0.95	0.97	0.97	NA	NA	None	NA	NA	NA	NA	NA	NA	NA	NA	0.4	Cases per 100,000 population	8602.45	8494.02	8469.57	8419.6	8410.95	8343.52	8354.6	8380.39	8352.01	8354.39	8321	8271.28	8367.07	8351.11	8410.88
4	PEV (Pre-Erythrocytic Vaccine)	3	0.35	2	0.1	Infants	6, 10, &, 14 weeks	None	0.700569	0.81	0.93	0.93	NA	NA	5-17mo	0 yrs	None	0.89	0.95	0.97	0.97	NA	NA	None	NA	NA	NA	NA	NA	NA	NA	NA	0.4	Severe Cases per 100,000 population	149.967	145.742	146.225	147.175	143.667	143.458	144.717	143.417	143.917	144.158	143.958	143.767	146.567	147.325	146.875
4	PEV (Pre-Erythrocytic Vaccine)	3	0.35	2	0.1	Infants	6, 10, &, 14 weeks	None	0.700569	0.81	0.93	0.93	NA	NA	5-17mo	0 yrs	None	0.89	0.95	0.97	0.97	NA	NA	None	NA	NA	NA	NA	NA	NA	NA	NA	0.4	Deaths per 100,000 population	30.75	30.3417	31.0417	30.625	29.6917	29.675	30.5083	30.125	30.55	29.7	30.6	30.5667	30.0167	30.45	30.8
4	PEV (Pre-Erythrocytic Vaccine)	3	0.35	2	0.1	Infants	6, 10, &, 14 weeks	None	0.700569	0.81	0.93	0.93	NA	NA	5-17mo	0 yrs	None	0.89	0.95	0.97	0.97	NA	NA	None	NA	NA	NA	NA	NA	NA	NA	NA	0.4	Cases in <5yo per 100,000 population	660.05	618.9	603.417	600.208	595.842	587.633	593.292	592.367	591.008	592.917	587.583	579.442	590.992	595.408	595.083
4	PEV (Pre-Erythrocytic Vaccine)	3	0.35	2	0.1	Infants	6, 10, &, 14 weeks	None	0.700569	0.81	0.93	0.93	NA	NA	5-17mo	0 yrs	None	0.89	0.95	0.97	0.97	NA	NA	None	NA	NA	NA	NA	NA	NA	NA	NA	0.4	Severe Cases in <5yo per 100,000 population	33.8667	32.0917	30.7667	31.675	31.2667	30.65	30.7917	29.9	30.3083	30.1083	30.6333	30.0583	31.3167	31.375	31.1
4	PEV (Pre-Erythrocytic Vaccine)	3	0.35	2	0.1	Infants	6, 10, &, 14 weeks	None	0.700569	0.81	0.93	0.93	NA	NA	5-17mo	0 yrs	None	0.89	0.95	0.97	0.97	NA	NA	None	NA	NA	NA	NA	NA	NA	NA	NA	0.4	Deaths in < 5yo per 100,000 population	8.43333	8.10833	7.88333	7.66667	8.08333	7.4	7.60833	7.875	7.60833	7.59167	8.03333	7.225	7.93333	7.775	7.61667
4	PEV (Pre-Erythrocytic Vaccine)	3	0.35	2	0.1	Infants	6, 10, &, 14 weeks	None	0.700569	0.81	0.93	0.93	NA	NA	5-17mo	0 yrs	None	0.89	0.95	0.97	0.97	NA	NA	None	NA	NA	NA	NA	NA	NA	NA	NA	0.4	DALYs per 100,000 population	784.819	775.595	786.189	779.553	757.697	753.765	775.776	764.674	775.757	756.927	779.308	777.095	764.787	775.389	782.406
4	PEV (Pre-Erythrocytic Vaccine)	3	0.35	2	0.1	Infants	6, 10, &, 14 weeks	None	0.700569	0.81	0.93	0.93	NA	NA	5-17mo	0 yrs	None	0.89	0.95	0.97	0.97	NA	NA	None	NA	NA	NA	NA	NA	NA	NA	NA	0.4	Income and productivity gains from delivering vaccine (US$ / dose)	-0.00336543	0.0239775	0.0284176	0.0431292	0.0464406	0.0624714	0.0608577	0.0499036	0.0578314	0.0575313	0.0674683	0.0789111	0.0551211	0.0583266	0.0422521
5	PEV (Pre-Erythrocytic Vaccine)	3	0.35	2	0.1	Infants	6, 10, &, 14 weeks	None	0.700569	0.81	0.93	0.93	NA	NA	5-17mo	0 yrs	None	0.7	0.81	0.93	0.93	NA	NA	None	NA	NA	NA	NA	NA	NA	NA	NA	0.4	Cases per 100,000 population	8595.94	8541.03	8507.52	8394.92	8390.9	8373.36	8360.33	8312.8	8278.03	8266.98	8327.42	8322.85	8331.85	8335.24	8319.2
5	PEV (Pre-Erythrocytic Vaccine)	3	0.35	2	0.1	Infants	6, 10, &, 14 weeks	None	0.700569	0.81	0.93	0.93	NA	NA	5-17mo	0 yrs	None	0.7	0.81	0.93	0.93	NA	NA	None	NA	NA	NA	NA	NA	NA	NA	NA	0.4	Severe Cases per 100,000 population	149.555	149.018	147.818	145.664	145.091	144.627	145.891	143.291	142.282	143.709	145.409	143.7	145.336	148.809	147.309
5	PEV (Pre-Erythrocytic Vaccine)	3	0.35	2	0.1	Infants	6, 10, &, 14 weeks	None	0.700569	0.81	0.93	0.93	NA	NA	5-17mo	0 yrs	None	0.7	0.81	0.93	0.93	NA	NA	None	NA	NA	NA	NA	NA	NA	NA	NA	0.4	Deaths per 100,000 population	30.8727	30.6818	31.2364	29.5455	29.8364	30.2727	29.7091	29.9818	29.2727	29.7364	29.7727	30.4091	30.0545	30.4545	30.4273
5	PEV (Pre-Erythrocytic Vaccine)	3	0.35	2	0.1	Infants	6, 10, &, 14 weeks	None	0.700569	0.81	0.93	0.93	NA	NA	5-17mo	0 yrs	None	0.7	0.81	0.93	0.93	NA	NA	None	NA	NA	NA	NA	NA	NA	NA	NA	0.4	Cases in <5yo per 100,000 population	663.255	632.491	617.855	597.364	597.009	592.691	591.127	590.309	579.109	577.245	591.727	584.655	589.8	589.609	584.245
5	PEV (Pre-Erythrocytic Vaccine)	3	0.35	2	0.1	Infants	6, 10, &, 14 weeks	None	0.700569	0.81	0.93	0.93	NA	NA	5-17mo	0 yrs	None	0.7	0.81	0.93	0.93	NA	NA	None	NA	NA	NA	NA	NA	NA	NA	NA	0.4	Severe Cases in <5yo per 100,000 population	34.3909	33.5	31.9636	31.3909	31.5	30.9364	30.1273	29.7636	30.1364	30.3	31.2727	30.0727	30.3273	31.8091	30.9455
5	PEV (Pre-Erythrocytic Vaccine)	3	0.35	2	0.1	Infants	6, 10, &, 14 weeks	None	0.700569	0.81	0.93	0.93	NA	NA	5-17mo	0 yrs	None	0.7	0.81	0.93	0.93	NA	NA	None	NA	NA	NA	NA	NA	NA	NA	NA	0.4	Deaths in < 5yo per 100,000 population	8.17273	8.2	8.06364	7.69091	7.95455	7.94545	7.55455	7.36364	8.13636	7.72727	7.29091	7.86364	7.71818	7.44545	7.50909
5	PEV (Pre-Erythrocytic Vaccine)	3	0.35	2	0.1	Infants	6, 10, &, 14 weeks	None	0.700569	0.81	0.93	0.93	NA	NA	5-17mo	0 yrs	None	0.7	0.81	0.93	0.93	NA	NA	None	NA	NA	NA	NA	NA	NA	NA	NA	0.4	DALYs per 100,000 population	783.977	780.054	797.212	756.344	762.735	768.452	755.575	759.801	749.493	756.8	759.787	774.677	767.568	775.327	771.834
5	PEV (Pre-Erythrocytic Vaccine)	3	0.35	2	0.1	Infants	6, 10, &, 14 weeks	None	0.700569	0.81	0.93	0.93	NA	NA	5-17mo	0 yrs	None	0.7	0.81	0.93	0.93	NA	NA	None	NA	NA	NA	NA	NA	NA	NA	NA	0.4	Income and productivity gains from delivering vaccine (US$ / dose)	-0.00229365	0.00989977	0.0180032	0.047391	0.0498583	0.0554128	0.0567779	0.069262	0.076947	0.0768854	0.0645676	0.0662932	0.0647001	0.0597352	0.0657467
6	PEV (Pre-Erythrocytic Vaccine)	3	0.35	2	0.1	Infants	6, 10, &, 14 weeks	None	0.700569	0.81	0.93	0.93	NA	NA	5-17mo	0 yrs	None	0.5	0.69	0.85	0.85	NA	NA	None	NA	NA	NA	NA	NA	NA	NA	NA	0.4	Cases per 100,000 population	8579.39	8561.48	8533.49	8452.95	8420.7	8424.28	8379.92	8421.82	8361.06	8329.95	8368.3	8344.37	8422.8	8443.53	8393.82
6	PEV (Pre-Erythrocytic Vaccine)	3	0.35	2	0.1	Infants	6, 10, &, 14 weeks	None	0.700569	0.81	0.93	0.93	NA	NA	5-17mo	0 yrs	None	0.5	0.69	0.85	0.85	NA	NA	None	NA	NA	NA	NA	NA	NA	NA	NA	0.4	Severe Cases per 100,000 population	149.855	148.518	146.409	147.145	144.255	147.209	144.318	145.336	147.136	145.064	144.609	144.173	146.591	147.964	145.936
6	PEV (Pre-Erythrocytic Vaccine)	3	0.35	2	0.1	Infants	6, 10, &, 14 weeks	None	0.700569	0.81	0.93	0.93	NA	NA	5-17mo	0 yrs	None	0.5	0.69	0.85	0.85	NA	NA	None	NA	NA	NA	NA	NA	NA	NA	NA	0.4	Deaths per 100,000 population	31.3364	30.5364	30.0727	31.2545	29.4455	30.5455	29.2273	30.1727	29.9545	30.4545	30.0545	30.1727	30.3818	30.1818	30.1727
6	PEV (Pre-Erythrocytic Vaccine)	3	0.35	2	0.1	Infants	6, 10, &, 14 weeks	None	0.700569	0.81	0.93	0.93	NA	NA	5-17mo	0 yrs	None	0.5	0.69	0.85	0.85	NA	NA	None	NA	NA	NA	NA	NA	NA	NA	NA	0.4	Cases in <5yo per 100,000 population	666.045	636.945	619.991	603.2	600.655	605.6	597.473	603.136	589.518	591.991	594	585.5	604.036	599.609	590.727
6	PEV (Pre-Erythrocytic Vaccine)	3	0.35	2	0.1	Infants	6, 10, &, 14 weeks	None	0.700569	0.81	0.93	0.93	NA	NA	5-17mo	0 yrs	None	0.5	0.69	0.85	0.85	NA	NA	None	NA	NA	NA	NA	NA	NA	NA	NA	0.4	Severe Cases in <5yo per 100,000 population	34.4364	32.4455	31.8818	30.9091	31.1545	30.9182	31.4636	31.6273	31.7091	31.1727	31.1636	31.0455	30.6455	31	30.0273
6	PEV (Pre-Erythrocytic Vaccine)	3	0.35	2	0.1	Infants	6, 10, &, 14 weeks	None	0.700569	0.81	0.93	0.93	NA	NA	5-17mo	0 yrs	None	0.5	0.69	0.85	0.85	NA	NA	None	NA	NA	NA	NA	NA	NA	NA	NA	0.4	Deaths in < 5yo per 100,000 population	8.19091	7.76364	7.91818	7.90909	7.21818	8.13636	7.82727	7.4	7.37273	7.70909	7.81818	8.03636	7.42727	7.45455	7.79091
6	PEV (Pre-Erythrocytic Vaccine)	3	0.35	2	0.1	Infants	6, 10, &, 14 weeks	None	0.700569	0.81	0.93	0.93	NA	NA	5-17mo	0 yrs	None	0.5	0.69	0.85	0.85	NA	NA	None	NA	NA	NA	NA	NA	NA	NA	NA	0.4	DALYs per 100,000 population	794.492	780.055	762.719	798.822	748.924	779.248	744.79	771.011	761.881	776.256	762.78	768.205	771.782	768.599	769.052
6	PEV (Pre-Erythrocytic Vaccine)	3	0.35	2	0.1	Infants	6, 10, &, 14 weeks	None	0.700569	0.81	0.93	0.93	NA	NA	5-17mo	0 yrs	None	0.5	0.69	0.85	0.85	NA	NA	None	NA	NA	NA	NA	NA	NA	NA	NA	0.4	Income and productivity gains from delivering vaccine (US$ / dose)	0.00264689	0.00600628	0.013046	0.0322771	0.0438553	0.0415548	0.0539551	0.0398892	0.0513346	0.0636342	0.0548577	0.0598669	0.041049	0.0327895	0.0472421
7	PEV (Pre-Erythrocytic Vaccine)	3	0.35	2	0.1	Infants	6, 10, &, 14 weeks	None	0.498525	0.69	0.85	0.85	NA	NA	5-17mo	0 yrs	None	0.89	0.95	0.97	0.97	NA	NA	None	NA	NA	NA	NA	NA	NA	NA	NA	0.4	Cases per 100,000 population	8574.79	8484.28	8481.56	8423.73	8406.86	8458.29	8447.49	8389.61	8393.82	8380.6	8426.33	8360.42	8460.15	8498.17	8428.86
7	PEV (Pre-Erythrocytic Vaccine)	3	0.35	2	0.1	Infants	6, 10, &, 14 weeks	None	0.498525	0.69	0.85	0.85	NA	NA	5-17mo	0 yrs	None	0.89	0.95	0.97	0.97	NA	NA	None	NA	NA	NA	NA	NA	NA	NA	NA	0.4	Severe Cases per 100,000 population	148.55	145.825	148.125	146.142	144.492	146.892	145.025	144.775	146.592	145.517	146.842	145.642	149.175	150.242	148.108
7	PEV (Pre-Erythrocytic Vaccine)	3	0.35	2	0.1	Infants	6, 10, &, 14 weeks	None	0.498525	0.69	0.85	0.85	NA	NA	5-17mo	0 yrs	None	0.89	0.95	0.97	0.97	NA	NA	None	NA	NA	NA	NA	NA	NA	NA	NA	0.4	Deaths per 100,000 population	30.2833	29.3083	30.55	30.1333	29.8667	30.2333	30.0333	30.0667	29.9667	29.75	30.1667	30.1667	30.1583	30.6	31.1667
7	PEV (Pre-Erythrocytic Vaccine)	3	0.35	2	0.1	Infants	6, 10, &, 14 weeks	None	0.498525	0.69	0.85	0.85	NA	NA	5-17mo	0 yrs	None	0.89	0.95	0.97	0.97	NA	NA	None	NA	NA	NA	NA	NA	NA	NA	NA	0.4	Cases in <5yo per 100,000 population	658.992	624.15	622.95	613.517	616.917	620.883	618.008	610.283	612.583	613.092	615.425	611.083	614.683	623.008	610.658
7	PEV (Pre-Erythrocytic Vaccine)	3	0.35	2	0.1	Infants	6, 10, &, 14 weeks	None	0.498525	0.69	0.85	0.85	NA	NA	5-17mo	0 yrs	None	0.89	0.95	0.97	0.97	NA	NA	None	NA	NA	NA	NA	NA	NA	NA	NA	0.4	Severe Cases in <5yo per 100,000 population	33.9917	33.3	31.4583	32.2417	31.6167	31.8167	31.1083	31.25	32.55	31.4583	31.7417	31.275	30.9083	33.05	31.4167
7	PEV (Pre-Erythrocytic Vaccine)	3	0.35	2	0.1	Infants	6, 10, &, 14 weeks	None	0.498525	0.69	0.85	0.85	NA	NA	5-17mo	0 yrs	None	0.89	0.95	0.97	0.97	NA	NA	None	NA	NA	NA	NA	NA	NA	NA	NA	0.4	Deaths in < 5yo per 100,000 population	7.91667	7.925	7.68333	7.73333	8.06667	7.925	7.86667	7.70833	8.125	7.275	7.78333	8.21667	7.79167	7.76667	8
7	PEV (Pre-Erythrocytic Vaccine)	3	0.35	2	0.1	Infants	6, 10, &, 14 weeks	None	0.498525	0.69	0.85	0.85	NA	NA	5-17mo	0 yrs	None	0.89	0.95	0.97	0.97	NA	NA	None	NA	NA	NA	NA	NA	NA	NA	NA	0.4	DALYs per 100,000 population	772.018	744.914	774.806	766.324	759.848	766.666	768.134	762.677	762.597	758.101	770.337	771.637	768.926	781.18	793.819
7	PEV (Pre-Erythrocytic Vaccine)	3	0.35	2	0.1	Infants	6, 10, &, 14 weeks	None	0.498525	0.69	0.85	0.85	NA	NA	5-17mo	0 yrs	None	0.89	0.95	0.97	0.97	NA	NA	None	NA	NA	NA	NA	NA	NA	NA	NA	0.4	Income and productivity gains from delivering vaccine (US$ / dose)	0.00187662	0.0345436	0.032427	0.0541585	0.0636757	0.0429344	0.0467913	0.0648274	0.0579189	0.0662802	0.0510995	0.0718415	0.0381548	0.024452	0.0477114
8	PEV (Pre-Erythrocytic Vaccine)	3	0.35	2	0.1	Infants	6, 10, &, 14 weeks	None	0.498525	0.69	0.85	0.85	NA	NA	5-17mo	0 yrs	None	0.7	0.81	0.93	0.93	NA	NA	None	NA	NA	NA	NA	NA	NA	NA	NA	0.4	Cases per 100,000 population	8602.73	8536.25	8520.45	8479.99	8533.95	8534.43	8479.2	8457.1	8373.6	8322.31	8291.28	8330.46	8320.74	8334.42	8331.38
8	PEV (Pre-Erythrocytic Vaccine)	3	0.35	2	0.1	Infants	6, 10, &, 14 weeks	None	0.498525	0.69	0.85	0.85	NA	NA	5-17mo	0 yrs	None	0.7	0.81	0.93	0.93	NA	NA	None	NA	NA	NA	NA	NA	NA	NA	NA	0.4	Severe Cases per 100,000 population	149.65	147.808	147.133	148.2	146.242	147.8	146.317	147.375	143.908	142.292	144.542	143.892	144.383	146.317	146.367
8	PEV (Pre-Erythrocytic Vaccine)	3	0.35	2	0.1	Infants	6, 10, &, 14 weeks	None	0.498525	0.69	0.85	0.85	NA	NA	5-17mo	0 yrs	None	0.7	0.81	0.93	0.93	NA	NA	None	NA	NA	NA	NA	NA	NA	NA	NA	0.4	Deaths per 100,000 population	30.3667	30.375	30.2333	30.1417	30.775	31.1917	30.2667	30	29.1083	30.5167	29.4	29.6167	29.2417	31.3333	29.7
8	PEV (Pre-Erythrocytic Vaccine)	3	0.35	2	0.1	Infants	6, 10, &, 14 weeks	None	0.498525	0.69	0.85	0.85	NA	NA	5-17mo	0 yrs	None	0.7	0.81	0.93	0.93	NA	NA	None	NA	NA	NA	NA	NA	NA	NA	NA	0.4	Cases in <5yo per 100,000 population	662.55	634.95	634.117	618.167	625.217	623.65	623.208	622.267	609.775	603.217	602.642	609.158	601.483	605.833	602.175
8	PEV (Pre-Erythrocytic Vaccine)	3	0.35	2	0.1	Infants	6, 10, &, 14 weeks	None	0.498525	0.69	0.85	0.85	NA	NA	5-17mo	0 yrs	None	0.7	0.81	0.93	0.93	NA	NA	None	NA	NA	NA	NA	NA	NA	NA	NA	0.4	Severe Cases in <5yo per 100,000 population	33.65	32.8917	32.3333	31.975	31.5833	31.7083	32.425	32.45	32.7917	31.5	32.075	31.225	31.0167	31.1917	30.9083
8	PEV (Pre-Erythrocytic Vaccine)	3	0.35	2	0.1	Infants	6, 10, &, 14 weeks	None	0.498525	0.69	0.85	0.85	NA	NA	5-17mo	0 yrs	None	0.7	0.81	0.93	0.93	NA	NA	None	NA	NA	NA	NA	NA	NA	NA	NA	0.4	Deaths in < 5yo per 100,000 population	8.1	7.64167	7.93333	8.025	8.10833	8.04167	7.7	7.76667	7.9	7.90833	7.63333	7.66667	7.7	8.08333	7.375
8	PEV (Pre-Erythrocytic Vaccine)	3	0.35	2	0.1	Infants	6, 10, &, 14 weeks	None	0.498525	0.69	0.85	0.85	NA	NA	5-17mo	0 yrs	None	0.7	0.81	0.93	0.93	NA	NA	None	NA	NA	NA	NA	NA	NA	NA	NA	0.4	DALYs per 100,000 population	777.018	774.322	772.064	768.765	780.944	795.935	770.849	766.311	745.509	777.041	747.924	754.607	745.392	793.447	756.677
8	PEV (Pre-Erythrocytic Vaccine)	3	0.35	2	0.1	Infants	6, 10, &, 14 weeks	None	0.498525	0.69	0.85	0.85	NA	NA	5-17mo	0 yrs	None	0.7	0.81	0.93	0.93	NA	NA	None	NA	NA	NA	NA	NA	NA	NA	NA	0.4	Income and productivity gains from delivering vaccine (US$ / dose)	-0.0037938	0.0156086	0.0222714	0.0318572	0.0214403	0.0171667	0.0369062	0.0396004	0.0677308	0.0867448	0.0946734	0.085874	0.0875269	0.081742	0.0818648
9	PEV (Pre-Erythrocytic Vaccine)	3	0.35	2	0.1	Infants	6, 10, &, 14 weeks	None	0.498525	0.69	0.85	0.85	NA	NA	5-17mo	0 yrs	None	0.5	0.69	0.85	0.85	NA	NA	None	NA	NA	NA	NA	NA	NA	NA	NA	0.4	Cases per 100,000 population	8594.12	8538.93	8485.77	8421.58	8430.62	8457.59	8402.48	8450.56	8415.23	8356.02	8422.42	8425.2	8450.2	8429.28	8384.6
9	PEV (Pre-Erythrocytic Vaccine)	3	0.35	2	0.1	Infants	6, 10, &, 14 weeks	None	0.498525	0.69	0.85	0.85	NA	NA	5-17mo	0 yrs	None	0.5	0.69	0.85	0.85	NA	NA	None	NA	NA	NA	NA	NA	NA	NA	NA	0.4	Severe Cases per 100,000 population	149.358	145.958	144.483	145.658	145.892	145.15	145.325	149.15	146.808	143.842	147.575	148.733	149.275	148.083	147.008
9	PEV (Pre-Erythrocytic Vaccine)	3	0.35	2	0.1	Infants	6, 10, &, 14 weeks	None	0.498525	0.69	0.85	0.85	NA	NA	5-17mo	0 yrs	None	0.5	0.69	0.85	0.85	NA	NA	None	NA	NA	NA	NA	NA	NA	NA	NA	0.4	Deaths per 100,000 population	30.75	31.6833	30.325	30.6667	30.325	30.4417	30.1	30.85	29.975	30.1833	29.95	30.2417	30.775	30.4333	29.8
9	PEV (Pre-Erythrocytic Vaccine)	3	0.35	2	0.1	Infants	6, 10, &, 14 weeks	None	0.498525	0.69	0.85	0.85	NA	NA	5-17mo	0 yrs	None	0.5	0.69	0.85	0.85	NA	NA	None	NA	NA	NA	NA	NA	NA	NA	NA	0.4	Cases in <5yo per 100,000 population	674.558	639.458	626.533	617.342	616.908	612.475	610.55	619.117	619.458	611.492	611.35	617.708	620.375	619.008	608.125
9	PEV (Pre-Erythrocytic Vaccine)	3	0.35	2	0.1	Infants	6, 10, &, 14 weeks	None	0.498525	0.69	0.85	0.85	NA	NA	5-17mo	0 yrs	None	0.5	0.69	0.85	0.85	NA	NA	None	NA	NA	NA	NA	NA	NA	NA	NA	0.4	Severe Cases in <5yo per 100,000 population	33.4083	31.9167	31.9417	32.3667	31.375	31.6667	31.4333	33.1167	31.7167	31.0167	32.1083	32.4167	32.0167	31.9417	31.8167
9	PEV (Pre-Erythrocytic Vaccine)	3	0.35	2	0.1	Infants	6, 10, &, 14 weeks	None	0.498525	0.69	0.85	0.85	NA	NA	5-17mo	0 yrs	None	0.5	0.69	0.85	0.85	NA	NA	None	NA	NA	NA	NA	NA	NA	NA	NA	0.4	Deaths in < 5yo per 100,000 population	8.16667	8.6	8.16667	7.9	7.90833	7.91667	7.84167	8.20833	7.425	7.64167	7.4	7.89167	7.80833	7.91667	7.48333
9	PEV (Pre-Erythrocytic Vaccine)	3	0.35	2	0.1	Infants	6, 10, &, 14 weeks	None	0.498525	0.69	0.85	0.85	NA	NA	5-17mo	0 yrs	None	0.5	0.69	0.85	0.85	NA	NA	None	NA	NA	NA	NA	NA	NA	NA	NA	0.4	DALYs per 100,000 population	781.906	804.29	772.482	782.47	773.449	775.819	769.129	786.793	762.635	766.188	765.572	769.148	783.269	775.923	759.449
9	PEV (Pre-Erythrocytic Vaccine)	3	0.35	2	0.1	Infants	6, 10, &, 14 weeks	None	0.498525	0.69	0.85	0.85	NA	NA	5-17mo	0 yrs	None	0.5	0.69	0.85	0.85	NA	NA	None	NA	NA	NA	NA	NA	NA	NA	NA	0.4	Income and productivity gains from delivering vaccine (US$ / dose)	-0.000391755	0.0182149	0.0352413	0.0549931	0.0537123	0.0444293	0.0627061	0.0407191	0.0515331	0.0743956	0.0515214	0.0502172	0.0420858	0.0498123	0.0628837
10	PEV (Pre-Erythrocytic Vaccine)	3	0.35	2	1	Infants	6, 10, &, 14 weeks	None	0.893855	0.95	0.97	0.97	NA	NA	5-17mo	0 yrs	None	0.89	0.95	0.97	0.97	NA	NA	None	NA	NA	NA	NA	NA	NA	NA	NA	0.4	Cases per 100,000 population	86159.8	85275.5	84833.7	84228.5	83355.1	83705.4	83803.5	82632.2	82431.7	83021.9	82790.1	82339.2	82414.5	81941.8	82481.9
10	PEV (Pre-Erythrocytic Vaccine)	3	0.35	2	1	Infants	6, 10, &, 14 weeks	None	0.893855	0.95	0.97	0.97	NA	NA	5-17mo	0 yrs	None	0.89	0.95	0.97	0.97	NA	NA	None	NA	NA	NA	NA	NA	NA	NA	NA	0.4	Severe Cases per 100,000 population	1490.82	1468.36	1458	1432.09	1417.09	1448.82	1443.36	1427.91	1436.82	1421.55	1402.82	1432.09	1420.18	1429.91	1454.27
10	PEV (Pre-Erythrocytic Vaccine)	3	0.35	2	1	Infants	6, 10, &, 14 weeks	None	0.893855	0.95	0.97	0.97	NA	NA	5-17mo	0 yrs	None	0.89	0.95	0.97	0.97	NA	NA	None	NA	NA	NA	NA	NA	NA	NA	NA	0.4	Deaths per 100,000 population	314.636	301.455	311.636	297.455	301.636	292.182	295.182	296.455	296.091	300.545	297.545	296.727	307.091	300	302.364
10	PEV (Pre-Erythrocytic Vaccine)	3	0.35	2	1	Infants	6, 10, &, 14 weeks	None	0.893855	0.95	0.97	0.97	NA	NA	5-17mo	0 yrs	None	0.89	0.95	0.97	0.97	NA	NA	None	NA	NA	NA	NA	NA	NA	NA	NA	0.4	Cases in <5yo per 100,000 population	6632.55	6196.73	5978.73	5780	5794.73	5734.45	5734.09	5655.73	5675.82	5645.18	5656.91	5647.73	5659.91	5593.09	5610.73
10	PEV (Pre-Erythrocytic Vaccine)	3	0.35	2	1	Infants	6, 10, &, 14 weeks	None	0.893855	0.95	0.97	0.97	NA	NA	5-17mo	0 yrs	None	0.89	0.95	0.97	0.97	NA	NA	None	NA	NA	NA	NA	NA	NA	NA	NA	0.4	Severe Cases in <5yo per 100,000 population	342.273	320.182	311.909	288.273	297.545	300.909	297.182	289.455	294.182	296.364	279.455	291.727	286.182	293.545	296.455
10	PEV (Pre-Erythrocytic Vaccine)	3	0.35	2	1	Infants	6, 10, &, 14 weeks	None	0.893855	0.95	0.97	0.97	NA	NA	5-17mo	0 yrs	None	0.89	0.95	0.97	0.97	NA	NA	None	NA	NA	NA	NA	NA	NA	NA	NA	0.4	Deaths in < 5yo per 100,000 population	78.7273	76.1818	81.7273	76.1818	73.8182	75.3636	72.5455	78.2727	72.3636	75.7273	74.4545	75.9091	76.7273	76.5455	75.6364
10	PEV (Pre-Erythrocytic Vaccine)	3	0.35	2	1	Infants	6, 10, &, 14 weeks	None	0.893855	0.95	0.97	0.97	NA	NA	5-17mo	0 yrs	None	0.89	0.95	0.97	0.97	NA	NA	None	NA	NA	NA	NA	NA	NA	NA	NA	0.4	DALYs per 100,000 population	7991.29	7685.65	7914.46	7598.5	7642.62	7466.89	7536.1	7578.25	7533.03	7678.21	7573.74	7605.68	7760.35	7635.36	7661.35
10	PEV (Pre-Erythrocytic Vaccine)	3	0.35	2	1	Infants	6, 10, &, 14 weeks	None	0.893855	0.95	0.97	0.97	NA	NA	5-17mo	0 yrs	None	0.89	0.95	0.97	0.97	NA	NA	None	NA	NA	NA	NA	NA	NA	NA	NA	0.4	Income and productivity gains from delivering vaccine (US$ / dose)	-0.0351314	0.112272	0.206037	0.337072	0.548622	0.433392	0.413568	0.65187	0.691315	0.565923	0.62898	0.725824	0.731497	0.804649	0.675564
11	PEV (Pre-Erythrocytic Vaccine)	3	0.35	2	1	Infants	6, 10, &, 14 weeks	None	0.893855	0.95	0.97	0.97	NA	NA	5-17mo	0 yrs	None	0.7	0.81	0.93	0.93	NA	NA	None	NA	NA	NA	NA	NA	NA	NA	NA	0.4	Cases per 100,000 population	85858.5	84422.9	84232.3	83884.6	83516.3	82708.8	82947.9	83856.6	82955.8	83005.5	83088	83070.5	82627.1	82843.4	82953.5
11	PEV (Pre-Erythrocytic Vaccine)	3	0.35	2	1	Infants	6, 10, &, 14 weeks	None	0.893855	0.95	0.97	0.97	NA	NA	5-17mo	0 yrs	None	0.7	0.81	0.93	0.93	NA	NA	None	NA	NA	NA	NA	NA	NA	NA	NA	0.4	Severe Cases per 100,000 population	1495.36	1455.91	1432.27	1439.82	1428.91	1418.82	1421.64	1436.55	1428.36	1455.64	1433.18	1458	1450.64	1447.73	1443.36
11	PEV (Pre-Erythrocytic Vaccine)	3	0.35	2	1	Infants	6, 10, &, 14 weeks	None	0.893855	0.95	0.97	0.97	NA	NA	5-17mo	0 yrs	None	0.7	0.81	0.93	0.93	NA	NA	None	NA	NA	NA	NA	NA	NA	NA	NA	0.4	Deaths per 100,000 population	306.636	291.727	305.909	303.818	299.364	297.727	292.182	304.909	301	302.364	300.909	307.545	289.818	303.364	300.909
11	PEV (Pre-Erythrocytic Vaccine)	3	0.35	2	1	Infants	6, 10, &, 14 weeks	None	0.893855	0.95	0.97	0.97	NA	NA	5-17mo	0 yrs	None	0.7	0.81	0.93	0.93	NA	NA	None	NA	NA	NA	NA	NA	NA	NA	NA	0.4	Cases in <5yo per 100,000 population	6684.64	6122.64	5946.45	5705.45	5721.36	5568.91	5633.55	5799	5699.91	5601	5725.36	5726.27	5620	5664.91	5685.36
11	PEV (Pre-Erythrocytic Vaccine)	3	0.35	2	1	Infants	6, 10, &, 14 weeks	None	0.893855	0.95	0.97	0.97	NA	NA	5-17mo	0 yrs	None	0.7	0.81	0.93	0.93	NA	NA	None	NA	NA	NA	NA	NA	NA	NA	NA	0.4	Severe Cases in <5yo per 100,000 population	342.455	314.818	300.273	304	288.364	287.545	287.455	292.545	297.273	299.273	296.818	303.818	301	294.182	297.636
11	PEV (Pre-Erythrocytic Vaccine)	3	0.35	2	1	Infants	6, 10, &, 14 weeks	None	0.893855	0.95	0.97	0.97	NA	NA	5-17mo	0 yrs	None	0.7	0.81	0.93	0.93	NA	NA	None	NA	NA	NA	NA	NA	NA	NA	NA	0.4	Deaths in < 5yo per 100,000 population	79.1818	72.3636	78.1818	80.2727	73.9091	74.5455	71.9091	74.4545	75.3636	74.8182	79.1818	80.0909	71.5455	75.2727	79.5455
11	PEV (Pre-Erythrocytic Vaccine)	3	0.35	2	1	Infants	6, 10, &, 14 weeks	None	0.893855	0.95	0.97	0.97	NA	NA	5-17mo	0 yrs	None	0.7	0.81	0.93	0.93	NA	NA	None	NA	NA	NA	NA	NA	NA	NA	NA	0.4	DALYs per 100,000 population	7815.89	7404	7759.59	7715.31	7583.5	7584.07	7444.02	7701.4	7645.81	7706.68	7661.65	7830.6	7381.45	7703.85	7675.56
11	PEV (Pre-Erythrocytic Vaccine)	3	0.35	2	1	Infants	6, 10, &, 14 weeks	None	0.893855	0.95	0.97	0.97	NA	NA	5-17mo	0 yrs	None	0.7	0.81	0.93	0.93	NA	NA	None	NA	NA	NA	NA	NA	NA	NA	NA	0.4	Income and productivity gains from delivering vaccine (US$ / dose)	0.00446819	0.305073	0.348562	0.405618	0.498505	0.660957	0.606977	0.383899	0.580632	0.542935	0.565928	0.565235	0.653926	0.595251	0.577119
12	PEV (Pre-Erythrocytic Vaccine)	3	0.35	2	1	Infants	6, 10, &, 14 weeks	None	0.893855	0.95	0.97	0.97	NA	NA	5-17mo	0 yrs	None	0.5	0.69	0.85	0.85	NA	NA	None	NA	NA	NA	NA	NA	NA	NA	NA	0.4	Cases per 100,000 population	85777	84466.6	83704.4	83515	83140.9	82292.3	83029.9	83076.7	83197.5	82925.2	83313.8	83602.2	83152.5	83366	83609.2
12	PEV (Pre-Erythrocytic Vaccine)	3	0.35	2	1	Infants	6, 10, &, 14 weeks	None	0.893855	0.95	0.97	0.97	NA	NA	5-17mo	0 yrs	None	0.5	0.69	0.85	0.85	NA	NA	None	NA	NA	NA	NA	NA	NA	NA	NA	0.4	Severe Cases per 100,000 population	1488.73	1459.91	1436.82	1444.82	1433.55	1410	1423.27	1410.36	1447.91	1457.73	1461.09	1461.73	1476.64	1445.64	1462.82
12	PEV (Pre-Erythrocytic Vaccine)	3	0.35	2	1	Infants	6, 10, &, 14 weeks	None	0.893855	0.95	0.97	0.97	NA	NA	5-17mo	0 yrs	None	0.5	0.69	0.85	0.85	NA	NA	None	NA	NA	NA	NA	NA	NA	NA	NA	0.4	Deaths per 100,000 population	307.091	305.727	302.182	302.273	296.545	299.182	290.364	291.545	303	306.455	302.636	298.273	306	300.636	304.455
12	PEV (Pre-Erythrocytic Vaccine)	3	0.35	2	1	Infants	6, 10, &, 14 weeks	None	0.893855	0.95	0.97	0.97	NA	NA	5-17mo	0 yrs	None	0.5	0.69	0.85	0.85	NA	NA	None	NA	NA	NA	NA	NA	NA	NA	NA	0.4	Cases in <5yo per 100,000 population	6660.64	6160	5857.64	5749.91	5719.09	5621.27	5651.27	5726.64	5670.82	5623.09	5731.73	5740.82	5689	5677	5721
12	PEV (Pre-Erythrocytic Vaccine)	3	0.35	2	1	Infants	6, 10, &, 14 weeks	None	0.893855	0.95	0.97	0.97	NA	NA	5-17mo	0 yrs	None	0.5	0.69	0.85	0.85	NA	NA	None	NA	NA	NA	NA	NA	NA	NA	NA	0.4	Severe Cases in <5yo per 100,000 population	342.182	317.273	300	299.455	304.182	280.182	299.364	281.727	302.273	298.364	304.909	307.909	313.182	294.091	298.545
12	PEV (Pre-Erythrocytic Vaccine)	3	0.35	2	1	Infants	6, 10, &, 14 weeks	None	0.893855	0.95	0.97	0.97	NA	NA	5-17mo	0 yrs	None	0.5	0.69	0.85	0.85	NA	NA	None	NA	NA	NA	NA	NA	NA	NA	NA	0.4	Deaths in < 5yo per 100,000 population	83.2727	77.9091	79.1818	78.8182	76.7273	72.7273	78.0909	79.6364	76.0909	72.4545	70.1818	76.2727	75.4545	73.2727	76.8182
12	PEV (Pre-Erythrocytic Vaccine)	3	0.35	2	1	Infants	6, 10, &, 14 weeks	None	0.893855	0.95	0.97	0.97	NA	NA	5-17mo	0 yrs	None	0.5	0.69	0.85	0.85	NA	NA	None	NA	NA	NA	NA	NA	NA	NA	NA	0.4	DALYs per 100,000 population	7799.48	7775.85	7714.63	7698.03	7574.07	7581.2	7451.44	7407.89	7707.56	7797.25	7665.91	7597.72	7738.58	7623.63	7714.87
12	PEV (Pre-Erythrocytic Vaccine)	3	0.35	2	1	Infants	6, 10, &, 14 weeks	None	0.893855	0.95	0.97	0.97	NA	NA	5-17mo	0 yrs	None	0.5	0.69	0.85	0.85	NA	NA	None	NA	NA	NA	NA	NA	NA	NA	NA	0.4	Income and productivity gains from delivering vaccine (US$ / dose)	0.0173689	0.309973	0.454989	0.480518	0.575478	0.758933	0.584025	0.584091	0.502922	0.566394	0.502843	0.428825	0.540024	0.490272	0.438722
13	PEV (Pre-Erythrocytic Vaccine)	3	0.35	2	1	Infants	6, 10, &, 14 weeks	None	0.700569	0.81	0.93	0.93	NA	NA	5-17mo	0 yrs	None	0.89	0.95	0.97	0.97	NA	NA	None	NA	NA	NA	NA	NA	NA	NA	NA	0.4	Cases per 100,000 population	86024.5	84940.2	84695.7	84196	84109.5	83435.2	83546	83803.9	83520.1	83543.9	83210	82712.8	83670.7	83511.1	84108.8
13	PEV (Pre-Erythrocytic Vaccine)	3	0.35	2	1	Infants	6, 10, &, 14 weeks	None	0.700569	0.81	0.93	0.93	NA	NA	5-17mo	0 yrs	None	0.89	0.95	0.97	0.97	NA	NA	None	NA	NA	NA	NA	NA	NA	NA	NA	0.4	Severe Cases per 100,000 population	1499.67	1457.42	1462.25	1471.75	1436.67	1434.58	1447.17	1434.17	1439.17	1441.58	1439.58	1437.67	1465.67	1473.25	1468.75
13	PEV (Pre-Erythrocytic Vaccine)	3	0.35	2	1	Infants	6, 10, &, 14 weeks	None	0.700569	0.81	0.93	0.93	NA	NA	5-17mo	0 yrs	None	0.89	0.95	0.97	0.97	NA	NA	None	NA	NA	NA	NA	NA	NA	NA	NA	0.4	Deaths per 100,000 population	307.5	303.417	310.417	306.25	296.917	296.75	305.083	301.25	305.5	297	306	305.667	300.167	304.5	308
13	PEV (Pre-Erythrocytic Vaccine)	3	0.35	2	1	Infants	6, 10, &, 14 weeks	None	0.700569	0.81	0.93	0.93	NA	NA	5-17mo	0 yrs	None	0.89	0.95	0.97	0.97	NA	NA	None	NA	NA	NA	NA	NA	NA	NA	NA	0.4	Cases in <5yo per 100,000 population	6600.5	6189	6034.17	6002.08	5958.42	5876.33	5932.92	5923.67	5910.08	5929.17	5875.83	5794.42	5909.92	5954.08	5950.83
13	PEV (Pre-Erythrocytic Vaccine)	3	0.35	2	1	Infants	6, 10, &, 14 weeks	None	0.700569	0.81	0.93	0.93	NA	NA	5-17mo	0 yrs	None	0.89	0.95	0.97	0.97	NA	NA	None	NA	NA	NA	NA	NA	NA	NA	NA	0.4	Severe Cases in <5yo per 100,000 population	338.667	320.917	307.667	316.75	312.667	306.5	307.917	299	303.083	301.083	306.333	300.583	313.167	313.75	311
13	PEV (Pre-Erythrocytic Vaccine)	3	0.35	2	1	Infants	6, 10, &, 14 weeks	None	0.700569	0.81	0.93	0.93	NA	NA	5-17mo	0 yrs	None	0.89	0.95	0.97	0.97	NA	NA	None	NA	NA	NA	NA	NA	NA	NA	NA	0.4	Deaths in < 5yo per 100,000 population	84.3333	81.0833	78.8333	76.6667	80.8333	74	76.0833	78.75	76.0833	75.9167	80.3333	72.25	79.3333	77.75	76.1667
13	PEV (Pre-Erythrocytic Vaccine)	3	0.35	2	1	Infants	6, 10, &, 14 weeks	None	0.700569	0.81	0.93	0.93	NA	NA	5-17mo	0 yrs	None	0.89	0.95	0.97	0.97	NA	NA	None	NA	NA	NA	NA	NA	NA	NA	NA	0.4	DALYs per 100,000 population	7848.19	7755.95	7861.89	7795.53	7576.97	7537.65	7757.76	7646.74	7757.57	7569.27	7793.08	7770.95	7647.87	7753.89	7824.06
13	PEV (Pre-Erythrocytic Vaccine)	3	0.35	2	1	Infants	6, 10, &, 14 weeks	None	0.700569	0.81	0.93	0.93	NA	NA	5-17mo	0 yrs	None	0.89	0.95	0.97	0.97	NA	NA	None	NA	NA	NA	NA	NA	NA	NA	NA	0.4	Income and productivity gains from delivering vaccine (US$ / dose)	-0.0336543	0.239775	0.284176	0.431292	0.464406	0.624714	0.608577	0.499036	0.578314	0.575313	0.674683	0.789111	0.551211	0.583266	0.422521
14	PEV (Pre-Erythrocytic Vaccine)	3	0.35	2	1	Infants	6, 10, &, 14 weeks	None	0.700569	0.81	0.93	0.93	NA	NA	5-17mo	0 yrs	None	0.7	0.81	0.93	0.93	NA	NA	None	NA	NA	NA	NA	NA	NA	NA	NA	0.4	Cases per 100,000 population	85959.4	85410.3	85075.2	83949.2	83909	83733.6	83603.3	83128	82780.3	82669.8	83274.2	83228.5	83318.5	83352.4	83192
14	PEV (Pre-Erythrocytic Vaccine)	3	0.35	2	1	Infants	6, 10, &, 14 weeks	None	0.700569	0.81	0.93	0.93	NA	NA	5-17mo	0 yrs	None	0.7	0.81	0.93	0.93	NA	NA	None	NA	NA	NA	NA	NA	NA	NA	NA	0.4	Severe Cases per 100,000 population	1495.55	1490.18	1478.18	1456.64	1450.91	1446.27	1458.91	1432.91	1422.82	1437.09	1454.09	1437	1453.36	1488.09	1473.09
14	PEV (Pre-Erythrocytic Vaccine)	3	0.35	2	1	Infants	6, 10, &, 14 weeks	None	0.700569	0.81	0.93	0.93	NA	NA	5-17mo	0 yrs	None	0.7	0.81	0.93	0.93	NA	NA	None	NA	NA	NA	NA	NA	NA	NA	NA	0.4	Deaths per 100,000 population	308.727	306.818	312.364	295.455	298.364	302.727	297.091	299.818	292.727	297.364	297.727	304.091	300.545	304.545	304.273
14	PEV (Pre-Erythrocytic Vaccine)	3	0.35	2	1	Infants	6, 10, &, 14 weeks	None	0.700569	0.81	0.93	0.93	NA	NA	5-17mo	0 yrs	None	0.7	0.81	0.93	0.93	NA	NA	None	NA	NA	NA	NA	NA	NA	NA	NA	0.4	Cases in <5yo per 100,000 population	6632.55	6324.91	6178.55	5973.64	5970.09	5926.91	5911.27	5903.09	5791.09	5772.45	5917.27	5846.55	5898	5896.09	5842.45
14	PEV (Pre-Erythrocytic Vaccine)	3	0.35	2	1	Infants	6, 10, &, 14 weeks	None	0.700569	0.81	0.93	0.93	NA	NA	5-17mo	0 yrs	None	0.7	0.81	0.93	0.93	NA	NA	None	NA	NA	NA	NA	NA	NA	NA	NA	0.4	Severe Cases in <5yo per 100,000 population	343.909	335	319.636	313.909	315	309.364	301.273	297.636	301.364	303	312.727	300.727	303.273	318.091	309.455
14	PEV (Pre-Erythrocytic Vaccine)	3	0.35	2	1	Infants	6, 10, &, 14 weeks	None	0.700569	0.81	0.93	0.93	NA	NA	5-17mo	0 yrs	None	0.7	0.81	0.93	0.93	NA	NA	None	NA	NA	NA	NA	NA	NA	NA	NA	0.4	Deaths in < 5yo per 100,000 population	81.7273	82	80.6364	76.9091	79.5455	79.4545	75.5455	73.6364	81.3636	77.2727	72.9091	78.6364	77.1818	74.4545	75.0909
14	PEV (Pre-Erythrocytic Vaccine)	3	0.35	2	1	Infants	6, 10, &, 14 weeks	None	0.700569	0.81	0.93	0.93	NA	NA	5-17mo	0 yrs	None	0.7	0.81	0.93	0.93	NA	NA	None	NA	NA	NA	NA	NA	NA	NA	NA	0.4	DALYs per 100,000 population	7839.77	7800.54	7972.12	7563.44	7627.35	7684.52	7555.75	7598.01	7494.93	7568	7597.87	7746.77	7675.68	7753.27	7718.34
14	PEV (Pre-Erythrocytic Vaccine)	3	0.35	2	1	Infants	6, 10, &, 14 weeks	None	0.700569	0.81	0.93	0.93	NA	NA	5-17mo	0 yrs	None	0.7	0.81	0.93	0.93	NA	NA	None	NA	NA	NA	NA	NA	NA	NA	NA	0.4	Income and productivity gains from delivering vaccine (US$ / dose)	-0.0229365	0.0989977	0.180032	0.47391	0.498583	0.554128	0.567779	0.69262	0.76947	0.768854	0.645676	0.662932	0.647001	0.597352	0.657467
15	PEV (Pre-Erythrocytic Vaccine)	3	0.35	2	1	Infants	6, 10, &, 14 weeks	None	0.700569	0.81	0.93	0.93	NA	NA	5-17mo	0 yrs	None	0.5	0.69	0.85	0.85	NA	NA	None	NA	NA	NA	NA	NA	NA	NA	NA	0.4	Cases per 100,000 population	85793.9	85614.8	85334.9	84529.5	84207	84242.8	83799.2	84218.2	83610.6	83299.5	83683	83443.7	84228	84435.3	83938.2
15	PEV (Pre-Erythrocytic Vaccine)	3	0.35	2	1	Infants	6, 10, &, 14 weeks	None	0.700569	0.81	0.93	0.93	NA	NA	5-17mo	0 yrs	None	0.5	0.69	0.85	0.85	NA	NA	None	NA	NA	NA	NA	NA	NA	NA	NA	0.4	Severe Cases per 100,000 population	1498.55	1485.18	1464.09	1471.45	1442.55	1472.09	1443.18	1453.36	1471.36	1450.64	1446.09	1441.73	1465.91	1479.64	1459.36
15	PEV (Pre-Erythrocytic Vaccine)	3	0.35	2	1	Infants	6, 10, &, 14 weeks	None	0.700569	0.81	0.93	0.93	NA	NA	5-17mo	0 yrs	None	0.5	0.69	0.85	0.85	NA	NA	None	NA	NA	NA	NA	NA	NA	NA	NA	0.4	Deaths per 100,000 population	313.364	305.364	300.727	312.545	294.455	305.455	292.273	301.727	299.545	304.545	300.545	301.727	303.818	301.818	301.727
15	PEV (Pre-Erythrocytic Vaccine)	3	0.35	2	1	Infants	6, 10, &, 14 weeks	None	0.700569	0.81	0.93	0.93	NA	NA	5-17mo	0 yrs	None	0.5	0.69	0.85	0.85	NA	NA	None	NA	NA	NA	NA	NA	NA	NA	NA	0.4	Cases in <5yo per 100,000 population	6660.45	6369.45	6199.91	6032	6006.55	6056	5974.73	6031.36	5895.18	5919.91	5940	5855	6040.36	5996.09	5907.27
15	PEV (Pre-Erythrocytic Vaccine)	3	0.35	2	1	Infants	6, 10, &, 14 weeks	None	0.700569	0.81	0.93	0.93	NA	NA	5-17mo	0 yrs	None	0.5	0.69	0.85	0.85	NA	NA	None	NA	NA	NA	NA	NA	NA	NA	NA	0.4	Severe Cases in <5yo per 100,000 population	344.364	324.455	318.818	309.091	311.545	309.182	314.636	316.273	317.091	311.727	311.636	310.455	306.455	310	300.273
15	PEV (Pre-Erythrocytic Vaccine)	3	0.35	2	1	Infants	6, 10, &, 14 weeks	None	0.700569	0.81	0.93	0.93	NA	NA	5-17mo	0 yrs	None	0.5	0.69	0.85	0.85	NA	NA	None	NA	NA	NA	NA	NA	NA	NA	NA	0.4	Deaths in < 5yo per 100,000 population	81.9091	77.6364	79.1818	79.0909	72.1818	81.3636	78.2727	74	73.7273	77.0909	78.1818	80.3636	74.2727	74.5455	77.9091
15	PEV (Pre-Erythrocytic Vaccine)	3	0.35	2	1	Infants	6, 10, &, 14 weeks	None	0.700569	0.81	0.93	0.93	NA	NA	5-17mo	0 yrs	None	0.5	0.69	0.85	0.85	NA	NA	None	NA	NA	NA	NA	NA	NA	NA	NA	0.4	DALYs per 100,000 population	7944.92	7800.55	7627.19	7988.22	7489.24	7792.48	7447.9	7710.11	7618.81	7762.56	7627.8	7682.05	7717.82	7685.99	7690.52
15	PEV (Pre-Erythrocytic Vaccine)	3	0.35	2	1	Infants	6, 10, &, 14 weeks	None	0.700569	0.81	0.93	0.93	NA	NA	5-17mo	0 yrs	None	0.5	0.69	0.85	0.85	NA	NA	None	NA	NA	NA	NA	NA	NA	NA	NA	0.4	Income and productivity gains from delivering vaccine (US$ / dose)	0.0264689	0.0600628	0.13046	0.322771	0.438553	0.415548	0.539551	0.398892	0.513346	0.636342	0.548577	0.598669	0.41049	0.327895	0.472421
16	PEV (Pre-Erythrocytic Vaccine)	3	0.35	2	1	Infants	6, 10, &, 14 weeks	None	0.498525	0.69	0.85	0.85	NA	NA	5-17mo	0 yrs	None	0.89	0.95	0.97	0.97	NA	NA	None	NA	NA	NA	NA	NA	NA	NA	NA	0.4	Cases per 100,000 population	85747.9	84842.8	84815.6	84237.2	84068.6	84582.9	84474.9	83896.1	83938.2	83806	84263.3	83604.2	84601.5	84981.8	84288.6
16	PEV (Pre-Erythrocytic Vaccine)	3	0.35	2	1	Infants	6, 10, &, 14 weeks	None	0.498525	0.69	0.85	0.85	NA	NA	5-17mo	0 yrs	None	0.89	0.95	0.97	0.97	NA	NA	None	NA	NA	NA	NA	NA	NA	NA	NA	0.4	Severe Cases per 100,000 population	1485.5	1458.25	1481.25	1461.42	1444.92	1468.92	1450.25	1447.75	1465.92	1455.17	1468.42	1456.42	1491.75	1502.42	1481.08
16	PEV (Pre-Erythrocytic Vaccine)	3	0.35	2	1	Infants	6, 10, &, 14 weeks	None	0.498525	0.69	0.85	0.85	NA	NA	5-17mo	0 yrs	None	0.89	0.95	0.97	0.97	NA	NA	None	NA	NA	NA	NA	NA	NA	NA	NA	0.4	Deaths per 100,000 population	302.833	293.083	305.5	301.333	298.667	302.333	300.333	300.667	299.667	297.5	301.667	301.667	301.583	306	311.667
16	PEV (Pre-Erythrocytic Vaccine)	3	0.35	2	1	Infants	6, 10, &, 14 weeks	None	0.498525	0.69	0.85	0.85	NA	NA	5-17mo	0 yrs	None	0.89	0.95	0.97	0.97	NA	NA	None	NA	NA	NA	NA	NA	NA	NA	NA	0.4	Cases in <5yo per 100,000 population	6589.92	6241.5	6229.5	6135.17	6169.17	6208.83	6180.08	6102.83	6125.83	6130.92	6154.25	6110.83	6146.83	6230.08	6106.58
16	PEV (Pre-Erythrocytic Vaccine)	3	0.35	2	1	Infants	6, 10, &, 14 weeks	None	0.498525	0.69	0.85	0.85	NA	NA	5-17mo	0 yrs	None	0.89	0.95	0.97	0.97	NA	NA	None	NA	NA	NA	NA	NA	NA	NA	NA	0.4	Severe Cases in <5yo per 100,000 population	339.917	333	314.583	322.417	316.167	318.167	311.083	312.5	325.5	314.583	317.417	312.75	309.083	330.5	314.167
16	PEV (Pre-Erythrocytic Vaccine)	3	0.35	2	1	Infants	6, 10, &, 14 weeks	None	0.498525	0.69	0.85	0.85	NA	NA	5-17mo	0 yrs	None	0.89	0.95	0.97	0.97	NA	NA	None	NA	NA	NA	NA	NA	NA	NA	NA	0.4	Deaths in < 5yo per 100,000 population	79.1667	79.25	76.8333	77.3333	80.6667	79.25	78.6667	77.0833	81.25	72.75	77.8333	82.1667	77.9167	77.6667	80
16	PEV (Pre-Erythrocytic Vaccine)	3	0.35	2	1	Infants	6, 10, &, 14 weeks	None	0.498525	0.69	0.85	0.85	NA	NA	5-17mo	0 yrs	None	0.89	0.95	0.97	0.97	NA	NA	None	NA	NA	NA	NA	NA	NA	NA	NA	0.4	DALYs per 100,000 population	7720.18	7449.14	7748.06	7663.24	7598.48	7666.66	7681.34	7626.77	7625.97	7581.01	7703.37	7716.37	7689.26	7811.8	7938.19
16	PEV (Pre-Erythrocytic Vaccine)	3	0.35	2	1	Infants	6, 10, &, 14 weeks	None	0.498525	0.69	0.85	0.85	NA	NA	5-17mo	0 yrs	None	0.89	0.95	0.97	0.97	NA	NA	None	NA	NA	NA	NA	NA	NA	NA	NA	0.4	Income and productivity gains from delivering vaccine (US$ / dose)	0.0187662	0.345436	0.32427	0.541585	0.636757	0.429344	0.467913	0.648274	0.579189	0.662802	0.510995	0.718415	0.381548	0.24452	0.477114
17	PEV (Pre-Erythrocytic Vaccine)	3	0.35	2	1	Infants	6, 10, &, 14 weeks	None	0.498525	0.69	0.85	0.85	NA	NA	5-17mo	0 yrs	None	0.7	0.81	0.93	0.93	NA	NA	None	NA	NA	NA	NA	NA	NA	NA	NA	0.4	Cases per 100,000 population	86027.3	85362.5	85204.5	84799.9	85339.5	85344.3	84792	84571	83736	83223.1	82912.8	83304.6	83207.4	83344.2	83313.8
17	PEV (Pre-Erythrocytic Vaccine)	3	0.35	2	1	Infants	6, 10, &, 14 weeks	None	0.498525	0.69	0.85	0.85	NA	NA	5-17mo	0 yrs	None	0.7	0.81	0.93	0.93	NA	NA	None	NA	NA	NA	NA	NA	NA	NA	NA	0.4	Severe Cases per 100,000 population	1496.5	1478.08	1471.33	1482	1462.42	1478	1463.17	1473.75	1439.08	1422.92	1445.42	1438.92	1443.83	1463.17	1463.67
17	PEV (Pre-Erythrocytic Vaccine)	3	0.35	2	1	Infants	6, 10, &, 14 weeks	None	0.498525	0.69	0.85	0.85	NA	NA	5-17mo	0 yrs	None	0.7	0.81	0.93	0.93	NA	NA	None	NA	NA	NA	NA	NA	NA	NA	NA	0.4	Deaths per 100,000 population	303.667	303.75	302.333	301.417	307.75	311.917	302.667	300	291.083	305.167	294	296.167	292.417	313.333	297
17	PEV (Pre-Erythrocytic Vaccine)	3	0.35	2	1	Infants	6, 10, &, 14 weeks	None	0.498525	0.69	0.85	0.85	NA	NA	5-17mo	0 yrs	None	0.7	0.81	0.93	0.93	NA	NA	None	NA	NA	NA	NA	NA	NA	NA	NA	0.4	Cases in <5yo per 100,000 population	6625.5	6349.5	6341.17	6181.67	6252.17	6236.5	6232.08	6222.67	6097.75	6032.17	6026.42	6091.58	6014.83	6058.33	6021.75
17	PEV (Pre-Erythrocytic Vaccine)	3	0.35	2	1	Infants	6, 10, &, 14 weeks	None	0.498525	0.69	0.85	0.85	NA	NA	5-17mo	0 yrs	None	0.7	0.81	0.93	0.93	NA	NA	None	NA	NA	NA	NA	NA	NA	NA	NA	0.4	Severe Cases in <5yo per 100,000 population	336.5	328.917	323.333	319.75	315.833	317.083	324.25	324.5	327.917	315	320.75	312.25	310.167	311.917	309.083
17	PEV (Pre-Erythrocytic Vaccine)	3	0.35	2	1	Infants	6, 10, &, 14 weeks	None	0.498525	0.69	0.85	0.85	NA	NA	5-17mo	0 yrs	None	0.7	0.81	0.93	0.93	NA	NA	None	NA	NA	NA	NA	NA	NA	NA	NA	0.4	Deaths in < 5yo per 100,000 population	81	76.4167	79.3333	80.25	81.0833	80.4167	77	77.6667	79	79.0833	76.3333	76.6667	77	80.8333	73.75
17	PEV (Pre-Erythrocytic Vaccine)	3	0.35	2	1	Infants	6, 10, &, 14 weeks	None	0.498525	0.69	0.85	0.85	NA	NA	5-17mo	0 yrs	None	0.7	0.81	0.93	0.93	NA	NA	None	NA	NA	NA	NA	NA	NA	NA	NA	0.4	DALYs per 100,000 population	7770.18	7743.22	7720.64	7687.65	7809.44	7959.35	7708.49	7663.11	7455.09	7770.41	7479.24	7546.07	7453.92	7934.47	7566.77
17	PEV (Pre-Erythrocytic Vaccine)	3	0.35	2	1	Infants	6, 10, &, 14 weeks	None	0.498525	0.69	0.85	0.85	NA	NA	5-17mo	0 yrs	None	0.7	0.81	0.93	0.93	NA	NA	None	NA	NA	NA	NA	NA	NA	NA	NA	0.4	Income and productivity gains from delivering vaccine (US$ / dose)	-0.037938	0.156086	0.222714	0.318572	0.214403	0.171667	0.369062	0.396004	0.677308	0.867448	0.946734	0.85874	0.875269	0.81742	0.818648
18	PEV (Pre-Erythrocytic Vaccine)	3	0.35	2	1	Infants	6, 10, &, 14 weeks	None	0.498525	0.69	0.85	0.85	NA	NA	5-17mo	0 yrs	None	0.5	0.69	0.85	0.85	NA	NA	None	NA	NA	NA	NA	NA	NA	NA	NA	0.4	Cases per 100,000 population	85941.2	85389.3	84857.7	84215.8	84306.2	84575.9	84024.8	84505.6	84152.3	83560.2	84224.2	84252	84502	84292.8	83846
18	PEV (Pre-Erythrocytic Vaccine)	3	0.35	2	1	Infants	6, 10, &, 14 weeks	None	0.498525	0.69	0.85	0.85	NA	NA	5-17mo	0 yrs	None	0.5	0.69	0.85	0.85	NA	NA	None	NA	NA	NA	NA	NA	NA	NA	NA	0.4	Severe Cases per 100,000 population	1493.58	1459.58	1444.83	1456.58	1458.92	1451.5	1453.25	1491.5	1468.08	1438.42	1475.75	1487.33	1492.75	1480.83	1470.08
18	PEV (Pre-Erythrocytic Vaccine)	3	0.35	2	1	Infants	6, 10, &, 14 weeks	None	0.498525	0.69	0.85	0.85	NA	NA	5-17mo	0 yrs	None	0.5	0.69	0.85	0.85	NA	NA	None	NA	NA	NA	NA	NA	NA	NA	NA	0.4	Deaths per 100,000 population	307.5	316.833	303.25	306.667	303.25	304.417	301	308.5	299.75	301.833	299.5	302.417	307.75	304.333	298
18	PEV (Pre-Erythrocytic Vaccine)	3	0.35	2	1	Infants	6, 10, &, 14 weeks	None	0.498525	0.69	0.85	0.85	NA	NA	5-17mo	0 yrs	None	0.5	0.69	0.85	0.85	NA	NA	None	NA	NA	NA	NA	NA	NA	NA	NA	0.4	Cases in <5yo per 100,000 population	6745.58	6394.58	6265.33	6173.42	6169.08	6124.75	6105.5	6191.17	6194.58	6114.92	6113.5	6177.08	6203.75	6190.08	6081.25
18	PEV (Pre-Erythrocytic Vaccine)	3	0.35	2	1	Infants	6, 10, &, 14 weeks	None	0.498525	0.69	0.85	0.85	NA	NA	5-17mo	0 yrs	None	0.5	0.69	0.85	0.85	NA	NA	None	NA	NA	NA	NA	NA	NA	NA	NA	0.4	Severe Cases in <5yo per 100,000 population	334.083	319.167	319.417	323.667	313.75	316.667	314.333	331.167	317.167	310.167	321.083	324.167	320.167	319.417	318.167
18	PEV (Pre-Erythrocytic Vaccine)	3	0.35	2	1	Infants	6, 10, &, 14 weeks	None	0.498525	0.69	0.85	0.85	NA	NA	5-17mo	0 yrs	None	0.5	0.69	0.85	0.85	NA	NA	None	NA	NA	NA	NA	NA	NA	NA	NA	0.4	Deaths in < 5yo per 100,000 population	81.6667	86	81.6667	79	79.0833	79.1667	78.4167	82.0833	74.25	76.4167	74	78.9167	78.0833	79.1667	74.8333
18	PEV (Pre-Erythrocytic Vaccine)	3	0.35	2	1	Infants	6, 10, &, 14 weeks	None	0.498525	0.69	0.85	0.85	NA	NA	5-17mo	0 yrs	None	0.5	0.69	0.85	0.85	NA	NA	None	NA	NA	NA	NA	NA	NA	NA	NA	0.4	DALYs per 100,000 population	7819.06	8042.9	7724.82	7824.7	7734.49	7758.19	7691.29	7867.93	7626.35	7661.88	7655.72	7691.48	7832.69	7759.23	7594.49
18	PEV (Pre-Erythrocytic Vaccine)	3	0.35	2	1	Infants	6, 10, &, 14 weeks	None	0.498525	0.69	0.85	0.85	NA	NA	5-17mo	0 yrs	None	0.5	0.69	0.85	0.85	NA	NA	None	NA	NA	NA	NA	NA	NA	NA	NA	0.4	Income and productivity gains from delivering vaccine (US$ / dose)	-0.00391755	0.182149	0.352413	0.549931	0.537123	0.444293	0.627061	0.407191	0.515331	0.743956	0.515214	0.502172	0.420858	0.498123	0.628837
19	PEV (Pre-Erythrocytic Vaccine)	3	0.35	2	10	Infants	6, 10, &, 14 weeks	None	0.893855	0.95	0.97	0.97	NA	NA	5-17mo	0 yrs	None	0.89	0.95	0.97	0.97	NA	NA	None	NA	NA	NA	NA	NA	NA	NA	NA	0.4	Cases per 100,000 population	138844	136985	136666	136377	136109	136248	136249	136508	136836	137083	137273	137517	137759	137844	138311
19	PEV (Pre-Erythrocytic Vaccine)	3	0.35	2	10	Infants	6, 10, &, 14 weeks	None	0.893855	0.95	0.97	0.97	NA	NA	5-17mo	0 yrs	None	0.89	0.95	0.97	0.97	NA	NA	None	NA	NA	NA	NA	NA	NA	NA	NA	0.4	Severe Cases per 100,000 population	1763.27	1716.36	1759	1745.82	1767.09	1754.82	1798.45	1781.45	1806.27	1814.55	1820.73	1846.64	1854.36	1827.64	1850.73
19	PEV (Pre-Erythrocytic Vaccine)	3	0.35	2	10	Infants	6, 10, &, 14 weeks	None	0.893855	0.95	0.97	0.97	NA	NA	5-17mo	0 yrs	None	0.89	0.95	0.97	0.97	NA	NA	None	NA	NA	NA	NA	NA	NA	NA	NA	0.4	Deaths per 100,000 population	360.273	343.727	343.636	342.545	340.818	337.636	353.545	349	343.909	352.909	355.636	360	365.636	355.909	364.273
19	PEV (Pre-Erythrocytic Vaccine)	3	0.35	2	10	Infants	6, 10, &, 14 weeks	None	0.893855	0.95	0.97	0.97	NA	NA	5-17mo	0 yrs	None	0.89	0.95	0.97	0.97	NA	NA	None	NA	NA	NA	NA	NA	NA	NA	NA	0.4	Cases in <5yo per 100,000 population	29196.7	27831.6	27388.3	27152.8	27043.9	27073.2	27022.9	27021.7	27068.7	27089.7	27145.8	27214.5	27077.4	27094.3	27048
19	PEV (Pre-Erythrocytic Vaccine)	3	0.35	2	10	Infants	6, 10, &, 14 weeks	None	0.893855	0.95	0.97	0.97	NA	NA	5-17mo	0 yrs	None	0.89	0.95	0.97	0.97	NA	NA	None	NA	NA	NA	NA	NA	NA	NA	NA	0.4	Severe Cases in <5yo per 100,000 population	1134.73	1086.55	1120.73	1113.36	1121.18	1103	1134.55	1114.55	1133.27	1124.36	1118.27	1129.45	1139.91	1122.55	1128.82
19	PEV (Pre-Erythrocytic Vaccine)	3	0.35	2	10	Infants	6, 10, &, 14 weeks	None	0.893855	0.95	0.97	0.97	NA	NA	5-17mo	0 yrs	None	0.89	0.95	0.97	0.97	NA	NA	None	NA	NA	NA	NA	NA	NA	NA	NA	0.4	Deaths in < 5yo per 100,000 population	231.909	215.727	218.818	217.364	214.364	211.818	221.909	214.636	210.182	218.182	219.727	218.727	223.273	218.364	218.636
19	PEV (Pre-Erythrocytic Vaccine)	3	0.35	2	10	Infants	6, 10, &, 14 weeks	None	0.893855	0.95	0.97	0.97	NA	NA	5-17mo	0 yrs	None	0.89	0.95	0.97	0.97	NA	NA	None	NA	NA	NA	NA	NA	NA	NA	NA	0.4	DALYs per 100,000 population	9775.92	9343.74	9383.52	9301.63	9289	9159.07	9614.72	9482.68	9335.06	9591.11	9648.71	9770.87	9935.39	9683.7	9856
19	PEV (Pre-Erythrocytic Vaccine)	3	0.35	2	10	Infants	6, 10, &, 14 weeks	None	0.893855	0.95	0.97	0.97	NA	NA	5-17mo	0 yrs	None	0.89	0.95	0.97	0.97	NA	NA	None	NA	NA	NA	NA	NA	NA	NA	NA	0.4	Income and productivity gains from delivering vaccine (US$ / dose)	0.155977	0.519096	0.528535	0.555708	0.588437	0.584456	0.531937	0.500299	0.409603	0.355478	0.318869	0.269743	0.179969	0.187611	0.0402825
20	PEV (Pre-Erythrocytic Vaccine)	3	0.35	2	10	Infants	6, 10, &, 14 weeks	None	0.893855	0.95	0.97	0.97	NA	NA	5-17mo	0 yrs	None	0.7	0.81	0.93	0.93	NA	NA	None	NA	NA	NA	NA	NA	NA	NA	NA	0.4	Cases per 100,000 population	138945	137224	136609	136505	136287	136042	136321	136413	136929	137041	137225	137388	137629	138014	138119
20	PEV (Pre-Erythrocytic Vaccine)	3	0.35	2	10	Infants	6, 10, &, 14 weeks	None	0.893855	0.95	0.97	0.97	NA	NA	5-17mo	0 yrs	None	0.7	0.81	0.93	0.93	NA	NA	None	NA	NA	NA	NA	NA	NA	NA	NA	0.4	Severe Cases per 100,000 population	1770.18	1738.36	1704.45	1736.73	1798	1776.18	1789.82	1815.45	1805.18	1807.45	1826.09	1855.18	1841.64	1849.27	1856.27
20	PEV (Pre-Erythrocytic Vaccine)	3	0.35	2	10	Infants	6, 10, &, 14 weeks	None	0.893855	0.95	0.97	0.97	NA	NA	5-17mo	0 yrs	None	0.7	0.81	0.93	0.93	NA	NA	None	NA	NA	NA	NA	NA	NA	NA	NA	0.4	Deaths per 100,000 population	354.727	340.182	343.364	331.545	349.455	354.091	346.455	348.364	355.818	348.545	352.636	363.091	356.182	358.818	359
20	PEV (Pre-Erythrocytic Vaccine)	3	0.35	2	10	Infants	6, 10, &, 14 weeks	None	0.893855	0.95	0.97	0.97	NA	NA	5-17mo	0 yrs	None	0.7	0.81	0.93	0.93	NA	NA	None	NA	NA	NA	NA	NA	NA	NA	NA	0.4	Cases in <5yo per 100,000 population	29311	27881.9	27391.6	27160.5	27117.5	26864.1	27107	26981.5	27162.4	27101.2	27102.6	27172.9	27102.8	27201.6	27227.3
20	PEV (Pre-Erythrocytic Vaccine)	3	0.35	2	10	Infants	6, 10, &, 14 weeks	None	0.893855	0.95	0.97	0.97	NA	NA	5-17mo	0 yrs	None	0.7	0.81	0.93	0.93	NA	NA	None	NA	NA	NA	NA	NA	NA	NA	NA	0.4	Severe Cases in <5yo per 100,000 population	1131	1106.09	1066.45	1108.09	1145.36	1119.18	1120.45	1145.09	1118.91	1114.45	1121.27	1140.73	1132	1132.36	1145.18
20	PEV (Pre-Erythrocytic Vaccine)	3	0.35	2	10	Infants	6, 10, &, 14 weeks	None	0.893855	0.95	0.97	0.97	NA	NA	5-17mo	0 yrs	None	0.7	0.81	0.93	0.93	NA	NA	None	NA	NA	NA	NA	NA	NA	NA	NA	0.4	Deaths in < 5yo per 100,000 population	227.364	211.727	213.091	212.364	225.818	220.091	213.273	218.727	222.364	213.273	214.818	222.727	214.818	220.545	219.455
20	PEV (Pre-Erythrocytic Vaccine)	3	0.35	2	10	Infants	6, 10, &, 14 weeks	None	0.893855	0.95	0.97	0.97	NA	NA	5-17mo	0 yrs	None	0.7	0.81	0.93	0.93	NA	NA	None	NA	NA	NA	NA	NA	NA	NA	NA	0.4	DALYs per 100,000 population	9636.53	9246.41	9345.17	9021.88	9477.2	9564.06	9425.04	9483.05	9658.19	9496.24	9597.88	9865.96	9657.89	9711.14	9731.8
20	PEV (Pre-Erythrocytic Vaccine)	3	0.35	2	10	Infants	6, 10, &, 14 weeks	None	0.893855	0.95	0.97	0.97	NA	NA	5-17mo	0 yrs	None	0.7	0.81	0.93	0.93	NA	NA	None	NA	NA	NA	NA	NA	NA	NA	NA	0.4	Income and productivity gains from delivering vaccine (US$ / dose)	0.150526	0.450056	0.553314	0.52182	0.551335	0.580917	0.528907	0.497375	0.395763	0.384728	0.316219	0.276929	0.218109	0.147056	0.11084
21	PEV (Pre-Erythrocytic Vaccine)	3	0.35	2	10	Infants	6, 10, &, 14 weeks	None	0.893855	0.95	0.97	0.97	NA	NA	5-17mo	0 yrs	None	0.5	0.69	0.85	0.85	NA	NA	None	NA	NA	NA	NA	NA	NA	NA	NA	0.4	Cases per 100,000 population	138964	137432	136542	136535	136064	136185	136067	136411	136589	136937	137376	137231	137596	138007	137955
21	PEV (Pre-Erythrocytic Vaccine)	3	0.35	2	10	Infants	6, 10, &, 14 weeks	None	0.893855	0.95	0.97	0.97	NA	NA	5-17mo	0 yrs	None	0.5	0.69	0.85	0.85	NA	NA	None	NA	NA	NA	NA	NA	NA	NA	NA	0.4	Severe Cases per 100,000 population	1790.82	1747.09	1750.45	1741.73	1749.45	1802.91	1783.18	1795.82	1796.36	1818.36	1838.73	1842.36	1831.64	1817.45	1836.82
21	PEV (Pre-Erythrocytic Vaccine)	3	0.35	2	10	Infants	6, 10, &, 14 weeks	None	0.893855	0.95	0.97	0.97	NA	NA	5-17mo	0 yrs	None	0.5	0.69	0.85	0.85	NA	NA	None	NA	NA	NA	NA	NA	NA	NA	NA	0.4	Deaths per 100,000 population	369	340.455	338.455	335.636	331.182	349.091	352.182	348.545	348.364	348	361.182	351.727	354.091	349.364	353.727
21	PEV (Pre-Erythrocytic Vaccine)	3	0.35	2	10	Infants	6, 10, &, 14 weeks	None	0.893855	0.95	0.97	0.97	NA	NA	5-17mo	0 yrs	None	0.5	0.69	0.85	0.85	NA	NA	None	NA	NA	NA	NA	NA	NA	NA	NA	0.4	Cases in <5yo per 100,000 population	29462.8	28028.5	27506.5	27195.5	26912.1	27126.5	27046.8	26954.5	26986.4	27015.4	27107.4	27125.9	27056.5	27082.5	27201.4
21	PEV (Pre-Erythrocytic Vaccine)	3	0.35	2	10	Infants	6, 10, &, 14 weeks	None	0.893855	0.95	0.97	0.97	NA	NA	5-17mo	0 yrs	None	0.5	0.69	0.85	0.85	NA	NA	None	NA	NA	NA	NA	NA	NA	NA	NA	0.4	Severe Cases in <5yo per 100,000 population	1154.82	1097.91	1111.36	1108	1115.55	1155.09	1119.64	1120.36	1115.45	1126	1132.27	1137.55	1124.45	1108.91	1123
21	PEV (Pre-Erythrocytic Vaccine)	3	0.35	2	10	Infants	6, 10, &, 14 weeks	None	0.893855	0.95	0.97	0.97	NA	NA	5-17mo	0 yrs	None	0.5	0.69	0.85	0.85	NA	NA	None	NA	NA	NA	NA	NA	NA	NA	NA	0.4	Deaths in < 5yo per 100,000 population	230.636	218.545	212.545	215.545	208.727	223	221	217.818	215.182	212.182	224.818	216.091	211.818	211.091	216.818
21	PEV (Pre-Erythrocytic Vaccine)	3	0.35	2	10	Infants	6, 10, &, 14 weeks	None	0.893855	0.95	0.97	0.97	NA	NA	5-17mo	0 yrs	None	0.5	0.69	0.85	0.85	NA	NA	None	NA	NA	NA	NA	NA	NA	NA	NA	0.4	DALYs per 100,000 population	9984.72	9251.9	9217.02	9120.93	9035.27	9484.11	9567.27	9486.62	9482.53	9454.14	9815.94	9540.62	9586.01	9474.52	9571.93
21	PEV (Pre-Erythrocytic Vaccine)	3	0.35	2	10	Infants	6, 10, &, 14 weeks	None	0.893855	0.95	0.97	0.97	NA	NA	5-17mo	0 yrs	None	0.5	0.69	0.85	0.85	NA	NA	None	NA	NA	NA	NA	NA	NA	NA	NA	0.4	Income and productivity gains from delivering vaccine (US$ / dose)	0.154257	0.426384	0.551711	0.522784	0.597773	0.56864	0.589687	0.516423	0.468586	0.375645	0.279667	0.317833	0.223025	0.127837	0.147714
22	PEV (Pre-Erythrocytic Vaccine)	3	0.35	2	10	Infants	6, 10, &, 14 weeks	None	0.700569	0.81	0.93	0.93	NA	NA	5-17mo	0 yrs	None	0.89	0.95	0.97	0.97	NA	NA	None	NA	NA	NA	NA	NA	NA	NA	NA	0.4	Cases per 100,000 population	138943	137376	137046	136998	137034	137090	137107	137049	137695	137665	137971	138317	138413	138452	138492
22	PEV (Pre-Erythrocytic Vaccine)	3	0.35	2	10	Infants	6, 10, &, 14 weeks	None	0.700569	0.81	0.93	0.93	NA	NA	5-17mo	0 yrs	None	0.89	0.95	0.97	0.97	NA	NA	None	NA	NA	NA	NA	NA	NA	NA	NA	0.4	Severe Cases per 100,000 population	1794.91	1750.18	1756.82	1768.45	1773.36	1804.27	1802.18	1804.27	1821.91	1844	1839.91	1833.55	1841.73	1850.82	1870.64
22	PEV (Pre-Erythrocytic Vaccine)	3	0.35	2	10	Infants	6, 10, &, 14 weeks	None	0.700569	0.81	0.93	0.93	NA	NA	5-17mo	0 yrs	None	0.89	0.95	0.97	0.97	NA	NA	None	NA	NA	NA	NA	NA	NA	NA	NA	0.4	Deaths per 100,000 population	360.818	343.364	349.636	359.091	355.364	349.364	355.091	353.455	361.545	358	366.273	350.818	372.818	352.727	351.636
22	PEV (Pre-Erythrocytic Vaccine)	3	0.35	2	10	Infants	6, 10, &, 14 weeks	None	0.700569	0.81	0.93	0.93	NA	NA	5-17mo	0 yrs	None	0.89	0.95	0.97	0.97	NA	NA	None	NA	NA	NA	NA	NA	NA	NA	NA	0.4	Cases in <5yo per 100,000 population	29255.5	28104.7	27823.4	27706.9	27778.3	27805	27851.3	27722.4	27811.9	27749.5	27826.8	27956.5	27841.1	27765.6	27798.3
22	PEV (Pre-Erythrocytic Vaccine)	3	0.35	2	10	Infants	6, 10, &, 14 weeks	None	0.700569	0.81	0.93	0.93	NA	NA	5-17mo	0 yrs	None	0.89	0.95	0.97	0.97	NA	NA	None	NA	NA	NA	NA	NA	NA	NA	NA	0.4	Severe Cases in <5yo per 100,000 population	1156	1105.82	1126.36	1132.45	1127.55	1152.82	1139.18	1146.55	1139.09	1148.45	1143.18	1142.82	1137.64	1145.18	1160.27
22	PEV (Pre-Erythrocytic Vaccine)	3	0.35	2	10	Infants	6, 10, &, 14 weeks	None	0.700569	0.81	0.93	0.93	NA	NA	5-17mo	0 yrs	None	0.89	0.95	0.97	0.97	NA	NA	None	NA	NA	NA	NA	NA	NA	NA	NA	0.4	Deaths in < 5yo per 100,000 population	229.364	216.455	222.182	228.182	223.364	222.182	227.182	222.364	230.455	223.273	225.273	214.636	231.909	218.091	219.273
22	PEV (Pre-Erythrocytic Vaccine)	3	0.35	2	10	Infants	6, 10, &, 14 weeks	None	0.700569	0.81	0.93	0.93	NA	NA	5-17mo	0 yrs	None	0.89	0.95	0.97	0.97	NA	NA	None	NA	NA	NA	NA	NA	NA	NA	NA	0.4	DALYs per 100,000 population	9765.04	9338.86	9517.84	9726.6	9621.18	9473.44	9674.45	9606.55	9794.47	9706.89	9952.15	9586.31	10065.2	9563.2	9548.82
22	PEV (Pre-Erythrocytic Vaccine)	3	0.35	2	10	Infants	6, 10, &, 14 weeks	None	0.700569	0.81	0.93	0.93	NA	NA	5-17mo	0 yrs	None	0.89	0.95	0.97	0.97	NA	NA	None	NA	NA	NA	NA	NA	NA	NA	NA	0.4	Income and productivity gains from delivering vaccine (US$ / dose)	0.146822	0.542466	0.574649	0.557716	0.573934	0.536778	0.521267	0.533175	0.363717	0.343273	0.266102	0.21388	0.155098	0.141743	0.0746805
23	PEV (Pre-Erythrocytic Vaccine)	3	0.35	2	10	Infants	6, 10, &, 14 weeks	None	0.700569	0.81	0.93	0.93	NA	NA	5-17mo	0 yrs	None	0.7	0.81	0.93	0.93	NA	NA	None	NA	NA	NA	NA	NA	NA	NA	NA	0.4	Cases per 100,000 population	138959	137573	137314	137054	137030	136854	137007	137145	137474	137847	137898	138105	138311	138588	138523
23	PEV (Pre-Erythrocytic Vaccine)	3	0.35	2	10	Infants	6, 10, &, 14 weeks	None	0.700569	0.81	0.93	0.93	NA	NA	5-17mo	0 yrs	None	0.7	0.81	0.93	0.93	NA	NA	None	NA	NA	NA	NA	NA	NA	NA	NA	0.4	Severe Cases per 100,000 population	1776	1742.91	1749.82	1778.73	1761.73	1791.09	1813.82	1819.27	1821.27	1817.91	1851.09	1820.45	1816.73	1849.45	1849.27
23	PEV (Pre-Erythrocytic Vaccine)	3	0.35	2	10	Infants	6, 10, &, 14 weeks	None	0.700569	0.81	0.93	0.93	NA	NA	5-17mo	0 yrs	None	0.7	0.81	0.93	0.93	NA	NA	None	NA	NA	NA	NA	NA	NA	NA	NA	0.4	Deaths per 100,000 population	358.364	355.455	346.727	353.636	346.091	341.455	364.455	347.545	349.455	358.091	368.545	359.091	346.636	356.818	347.727
23	PEV (Pre-Erythrocytic Vaccine)	3	0.35	2	10	Infants	6, 10, &, 14 weeks	None	0.700569	0.81	0.93	0.93	NA	NA	5-17mo	0 yrs	None	0.7	0.81	0.93	0.93	NA	NA	None	NA	NA	NA	NA	NA	NA	NA	NA	0.4	Cases in <5yo per 100,000 population	29334.8	28180.4	27957.8	27735	27754.7	27724.3	27702.5	27762.8	27806.5	27806.1	27725.9	27733.8	27881.9	27928.1	27886.7
23	PEV (Pre-Erythrocytic Vaccine)	3	0.35	2	10	Infants	6, 10, &, 14 weeks	None	0.700569	0.81	0.93	0.93	NA	NA	5-17mo	0 yrs	None	0.7	0.81	0.93	0.93	NA	NA	None	NA	NA	NA	NA	NA	NA	NA	NA	0.4	Severe Cases in <5yo per 100,000 population	1134.09	1112.18	1115	1147.09	1127.64	1133.27	1138.09	1148.82	1142.36	1128	1162.91	1131.55	1131.36	1145	1154.73
23	PEV (Pre-Erythrocytic Vaccine)	3	0.35	2	10	Infants	6, 10, &, 14 weeks	None	0.700569	0.81	0.93	0.93	NA	NA	5-17mo	0 yrs	None	0.7	0.81	0.93	0.93	NA	NA	None	NA	NA	NA	NA	NA	NA	NA	NA	0.4	Deaths in < 5yo per 100,000 population	233.091	223.545	220.364	222.909	223.182	215.455	228.091	221.818	215	224.182	229.818	221.455	217.364	222	212.909
23	PEV (Pre-Erythrocytic Vaccine)	3	0.35	2	10	Infants	6, 10, &, 14 weeks	None	0.700569	0.81	0.93	0.93	NA	NA	5-17mo	0 yrs	None	0.7	0.81	0.93	0.93	NA	NA	None	NA	NA	NA	NA	NA	NA	NA	NA	0.4	DALYs per 100,000 population	9676.6	9624.33	9412.17	9579.53	9404.54	9252.03	9872.29	9420	9486.17	9713.18	9982.6	9763.83	9414.87	9672.94	9462.53
23	PEV (Pre-Erythrocytic Vaccine)	3	0.35	2	10	Infants	6, 10, &, 14 weeks	None	0.700569	0.81	0.93	0.93	NA	NA	5-17mo	0 yrs	None	0.7	0.81	0.93	0.93	NA	NA	None	NA	NA	NA	NA	NA	NA	NA	NA	0.4	Income and productivity gains from delivering vaccine (US$ / dose)	0.155545	0.499369	0.530607	0.545977	0.568548	0.602056	0.539899	0.524266	0.413194	0.312955	0.277144	0.25708	0.205916	0.107827	0.11379
24	PEV (Pre-Erythrocytic Vaccine)	3	0.35	2	10	Infants	6, 10, &, 14 weeks	None	0.700569	0.81	0.93	0.93	NA	NA	5-17mo	0 yrs	None	0.5	0.69	0.85	0.85	NA	NA	None	NA	NA	NA	NA	NA	NA	NA	NA	0.4	Cases per 100,000 population	139155	137462	137331	137170	136836	137274	137052	137211	137357	137648	137953	138120	138412	138139	138600
24	PEV (Pre-Erythrocytic Vaccine)	3	0.35	2	10	Infants	6, 10, &, 14 weeks	None	0.700569	0.81	0.93	0.93	NA	NA	5-17mo	0 yrs	None	0.5	0.69	0.85	0.85	NA	NA	None	NA	NA	NA	NA	NA	NA	NA	NA	0.4	Severe Cases per 100,000 population	1767.45	1736.09	1763.45	1761.91	1773.91	1797.55	1800.91	1813.64	1842.45	1825.55	1841.64	1844.82	1855.27	1828.09	1843.36
24	PEV (Pre-Erythrocytic Vaccine)	3	0.35	2	10	Infants	6, 10, &, 14 weeks	None	0.700569	0.81	0.93	0.93	NA	NA	5-17mo	0 yrs	None	0.5	0.69	0.85	0.85	NA	NA	None	NA	NA	NA	NA	NA	NA	NA	NA	0.4	Deaths per 100,000 population	358.909	333	351.091	341.636	347	351.545	353.455	361	352.182	360.636	359.727	368	366	361.455	360.909
24	PEV (Pre-Erythrocytic Vaccine)	3	0.35	2	10	Infants	6, 10, &, 14 weeks	None	0.700569	0.81	0.93	0.93	NA	NA	5-17mo	0 yrs	None	0.5	0.69	0.85	0.85	NA	NA	None	NA	NA	NA	NA	NA	NA	NA	NA	0.4	Cases in <5yo per 100,000 population	29588.7	28275.5	28007.9	27779.1	27702.5	27835.1	27758.6	27712.2	27757.4	27745.7	27778.5	27887.1	27832.1	27831.5	27813.2
24	PEV (Pre-Erythrocytic Vaccine)	3	0.35	2	10	Infants	6, 10, &, 14 weeks	None	0.700569	0.81	0.93	0.93	NA	NA	5-17mo	0 yrs	None	0.5	0.69	0.85	0.85	NA	NA	None	NA	NA	NA	NA	NA	NA	NA	NA	0.4	Severe Cases in <5yo per 100,000 population	1139	1112.82	1138.91	1134.91	1132.82	1150.36	1128.09	1137.45	1154.27	1144.18	1147.55	1156.64	1149.36	1130.45	1152.45
24	PEV (Pre-Erythrocytic Vaccine)	3	0.35	2	10	Infants	6, 10, &, 14 weeks	None	0.700569	0.81	0.93	0.93	NA	NA	5-17mo	0 yrs	None	0.5	0.69	0.85	0.85	NA	NA	None	NA	NA	NA	NA	NA	NA	NA	NA	0.4	Deaths in < 5yo per 100,000 population	233.818	214	219.909	217.727	220.364	223.364	219.273	226.818	215.636	225.091	220.364	228.455	225.273	221.091	217.364
24	PEV (Pre-Erythrocytic Vaccine)	3	0.35	2	10	Infants	6, 10, &, 14 weeks	None	0.700569	0.81	0.93	0.93	NA	NA	5-17mo	0 yrs	None	0.5	0.69	0.85	0.85	NA	NA	None	NA	NA	NA	NA	NA	NA	NA	NA	0.4	DALYs per 100,000 population	9716.85	9042.16	9512.25	9268.92	9401.79	9581.48	9612.04	9800.94	9550.78	9772.05	9728.13	10000.7	9947.43	9776.56	9791.91
24	PEV (Pre-Erythrocytic Vaccine)	3	0.35	2	10	Infants	6, 10, &, 14 weeks	None	0.700569	0.81	0.93	0.93	NA	NA	5-17mo	0 yrs	None	0.5	0.69	0.85	0.85	NA	NA	None	NA	NA	NA	NA	NA	NA	NA	NA	0.4	Income and productivity gains from delivering vaccine (US$ / dose)	0.163638	0.544154	0.52979	0.535809	0.603112	0.493564	0.518769	0.497214	0.420398	0.34492	0.27739	0.245581	0.132786	0.23848	0.0869717
25	PEV (Pre-Erythrocytic Vaccine)	3	0.35	2	10	Infants	6, 10, &, 14 weeks	None	0.498525	0.69	0.85	0.85	NA	NA	5-17mo	0 yrs	None	0.89	0.95	0.97	0.97	NA	NA	None	NA	NA	NA	NA	NA	NA	NA	NA	0.4	Cases per 100,000 population	138843	137742	137668	137706	137689	137876	137667	138081	138270	138584	138656	138566	138922	138984	138981
25	PEV (Pre-Erythrocytic Vaccine)	3	0.35	2	10	Infants	6, 10, &, 14 weeks	None	0.498525	0.69	0.85	0.85	NA	NA	5-17mo	0 yrs	None	0.89	0.95	0.97	0.97	NA	NA	None	NA	NA	NA	NA	NA	NA	NA	NA	0.4	Severe Cases per 100,000 population	1771.64	1766.82	1758.09	1784.82	1794	1830.18	1843.18	1832.55	1836.64	1828.55	1838.55	1853.27	1840.91	1838.55	1846.45
25	PEV (Pre-Erythrocytic Vaccine)	3	0.35	2	10	Infants	6, 10, &, 14 weeks	None	0.498525	0.69	0.85	0.85	NA	NA	5-17mo	0 yrs	None	0.89	0.95	0.97	0.97	NA	NA	None	NA	NA	NA	NA	NA	NA	NA	NA	0.4	Deaths per 100,000 population	349.091	356.909	352	347.364	358.545	344.182	357.909	352	355.273	360.455	358.273	352.455	361.636	367.727	355.545
25	PEV (Pre-Erythrocytic Vaccine)	3	0.35	2	10	Infants	6, 10, &, 14 weeks	None	0.498525	0.69	0.85	0.85	NA	NA	5-17mo	0 yrs	None	0.89	0.95	0.97	0.97	NA	NA	None	NA	NA	NA	NA	NA	NA	NA	NA	0.4	Cases in <5yo per 100,000 population	29368.2	28524.1	28317.2	28373	28327.4	28413.4	28395.1	28441.6	28533.4	28547.5	28569.6	28496.5	28568.2	28489.5	28462.8
25	PEV (Pre-Erythrocytic Vaccine)	3	0.35	2	10	Infants	6, 10, &, 14 weeks	None	0.498525	0.69	0.85	0.85	NA	NA	5-17mo	0 yrs	None	0.89	0.95	0.97	0.97	NA	NA	None	NA	NA	NA	NA	NA	NA	NA	NA	0.4	Severe Cases in <5yo per 100,000 population	1141.55	1137.55	1132.64	1151.45	1150.55	1176.55	1178.73	1160.09	1159.64	1157.55	1159.82	1154.73	1151.91	1159.73	1164.18
25	PEV (Pre-Erythrocytic Vaccine)	3	0.35	2	10	Infants	6, 10, &, 14 weeks	None	0.498525	0.69	0.85	0.85	NA	NA	5-17mo	0 yrs	None	0.89	0.95	0.97	0.97	NA	NA	None	NA	NA	NA	NA	NA	NA	NA	NA	0.4	Deaths in < 5yo per 100,000 population	224.182	228.636	224.818	220.545	224.545	220.909	225.273	219.727	223	225.636	225	222.818	223.545	230.273	223.455
25	PEV (Pre-Erythrocytic Vaccine)	3	0.35	2	10	Infants	6, 10, &, 14 weeks	None	0.498525	0.69	0.85	0.85	NA	NA	5-17mo	0 yrs	None	0.89	0.95	0.97	0.97	NA	NA	None	NA	NA	NA	NA	NA	NA	NA	NA	0.4	DALYs per 100,000 population	9477.61	9675.12	9538.7	9436.8	9739.59	9376.6	9714.77	9549.91	9641	9781.56	9720.16	9582.93	9848.3	9987.07	9634.25
25	PEV (Pre-Erythrocytic Vaccine)	3	0.35	2	10	Infants	6, 10, &, 14 weeks	None	0.498525	0.69	0.85	0.85	NA	NA	5-17mo	0 yrs	None	0.89	0.95	0.97	0.97	NA	NA	None	NA	NA	NA	NA	NA	NA	NA	NA	0.4	Income and productivity gains from delivering vaccine (US$ / dose)	0.211758	0.615005	0.608504	0.569185	0.57793	0.502395	0.52052	0.442086	0.352865	0.262402	0.249507	0.233892	0.140786	0.103177	0.0865447
26	PEV (Pre-Erythrocytic Vaccine)	3	0.35	2	10	Infants	6, 10, &, 14 weeks	None	0.498525	0.69	0.85	0.85	NA	NA	5-17mo	0 yrs	None	0.7	0.81	0.93	0.93	NA	NA	None	NA	NA	NA	NA	NA	NA	NA	NA	0.4	Cases per 100,000 population	139270	137975	137558	137809	137662	137968	137930	137970	138133	138385	138560	138610	138509	138650	139103
26	PEV (Pre-Erythrocytic Vaccine)	3	0.35	2	10	Infants	6, 10, &, 14 weeks	None	0.498525	0.69	0.85	0.85	NA	NA	5-17mo	0 yrs	None	0.7	0.81	0.93	0.93	NA	NA	None	NA	NA	NA	NA	NA	NA	NA	NA	0.4	Severe Cases per 100,000 population	1770.27	1766	1749.18	1778.45	1799.27	1813.36	1804.45	1818.82	1837.18	1858.82	1836.36	1834.18	1850.73	1837.64	1838.73
26	PEV (Pre-Erythrocytic Vaccine)	3	0.35	2	10	Infants	6, 10, &, 14 weeks	None	0.498525	0.69	0.85	0.85	NA	NA	5-17mo	0 yrs	None	0.7	0.81	0.93	0.93	NA	NA	None	NA	NA	NA	NA	NA	NA	NA	NA	0.4	Deaths per 100,000 population	353.909	342.909	341	339.455	347.636	348	361.818	359.818	365.091	359.545	353.364	351.909	362.273	365.545	368.909
26	PEV (Pre-Erythrocytic Vaccine)	3	0.35	2	10	Infants	6, 10, &, 14 weeks	None	0.498525	0.69	0.85	0.85	NA	NA	5-17mo	0 yrs	None	0.7	0.81	0.93	0.93	NA	NA	None	NA	NA	NA	NA	NA	NA	NA	NA	0.4	Cases in <5yo per 100,000 population	29551.9	28535.5	28327.1	28228.4	28409.1	28507.4	28328.5	28352.7	28415.5	28543.5	28464.4	28506.5	28378.6	28426.8	28539.9
26	PEV (Pre-Erythrocytic Vaccine)	3	0.35	2	10	Infants	6, 10, &, 14 weeks	None	0.498525	0.69	0.85	0.85	NA	NA	5-17mo	0 yrs	None	0.7	0.81	0.93	0.93	NA	NA	None	NA	NA	NA	NA	NA	NA	NA	NA	0.4	Severe Cases in <5yo per 100,000 population	1147.18	1136.64	1117.55	1159.55	1162.64	1160.82	1150.45	1152.09	1162.27	1174.91	1162.45	1154.91	1163.91	1151	1160
26	PEV (Pre-Erythrocytic Vaccine)	3	0.35	2	10	Infants	6, 10, &, 14 weeks	None	0.498525	0.69	0.85	0.85	NA	NA	5-17mo	0 yrs	None	0.7	0.81	0.93	0.93	NA	NA	None	NA	NA	NA	NA	NA	NA	NA	NA	0.4	Deaths in < 5yo per 100,000 population	228.273	223.636	217.818	217.545	225.455	219.545	228.545	227.727	231.818	229.364	225.273	221.091	229.545	227.636	232.545
26	PEV (Pre-Erythrocytic Vaccine)	3	0.35	2	10	Infants	6, 10, &, 14 weeks	None	0.498525	0.69	0.85	0.85	NA	NA	5-17mo	0 yrs	None	0.7	0.81	0.93	0.93	NA	NA	None	NA	NA	NA	NA	NA	NA	NA	NA	0.4	DALYs per 100,000 population	9622.51	9334.93	9262.59	9243.15	9435.43	9457.54	9831.59	9738.51	9923.64	9792.65	9608.33	9559.71	9833.74	9913.54	10023.8
26	PEV (Pre-Erythrocytic Vaccine)	3	0.35	2	10	Infants	6, 10, &, 14 weeks	None	0.498525	0.69	0.85	0.85	NA	NA	5-17mo	0 yrs	None	0.7	0.81	0.93	0.93	NA	NA	None	NA	NA	NA	NA	NA	NA	NA	NA	0.4	Income and productivity gains from delivering vaccine (US$ / dose)	0.146236	0.541284	0.65063	0.525299	0.60149	0.503614	0.4527	0.465979	0.377852	0.320979	0.250247	0.267106	0.251826	0.240876	0.0593473
27	PEV (Pre-Erythrocytic Vaccine)	3	0.35	2	10	Infants	6, 10, &, 14 weeks	None	0.498525	0.69	0.85	0.85	NA	NA	5-17mo	0 yrs	None	0.5	0.69	0.85	0.85	NA	NA	None	NA	NA	NA	NA	NA	NA	NA	NA	0.4	Cases per 100,000 population	139012	138181	137811	137891	137966	137725	137763	137772	138130	138339	138587	138520	138812	138856	139102
27	PEV (Pre-Erythrocytic Vaccine)	3	0.35	2	10	Infants	6, 10, &, 14 weeks	None	0.498525	0.69	0.85	0.85	NA	NA	5-17mo	0 yrs	None	0.5	0.69	0.85	0.85	NA	NA	None	NA	NA	NA	NA	NA	NA	NA	NA	0.4	Severe Cases per 100,000 population	1814.36	1771.36	1787.55	1769.09	1810	1805.55	1805.82	1816	1850	1865.18	1849.36	1829.82	1839.73	1856	1875.73
27	PEV (Pre-Erythrocytic Vaccine)	3	0.35	2	10	Infants	6, 10, &, 14 weeks	None	0.498525	0.69	0.85	0.85	NA	NA	5-17mo	0 yrs	None	0.5	0.69	0.85	0.85	NA	NA	None	NA	NA	NA	NA	NA	NA	NA	NA	0.4	Deaths per 100,000 population	353.182	353.455	361.636	348	349.455	352.091	347.727	355.273	358.909	365.636	357	360.455	369.273	349.545	361.273
27	PEV (Pre-Erythrocytic Vaccine)	3	0.35	2	10	Infants	6, 10, &, 14 weeks	None	0.498525	0.69	0.85	0.85	NA	NA	5-17mo	0 yrs	None	0.5	0.69	0.85	0.85	NA	NA	None	NA	NA	NA	NA	NA	NA	NA	NA	0.4	Cases in <5yo per 100,000 population	29574.6	28701.6	28533	28429.7	28425.1	28476.4	28342.6	28380.9	28509.8	28371.4	28434.5	28484.2	28513.9	28463.9	28547.9
27	PEV (Pre-Erythrocytic Vaccine)	3	0.35	2	10	Infants	6, 10, &, 14 weeks	None	0.498525	0.69	0.85	0.85	NA	NA	5-17mo	0 yrs	None	0.5	0.69	0.85	0.85	NA	NA	None	NA	NA	NA	NA	NA	NA	NA	NA	0.4	Severe Cases in <5yo per 100,000 population	1167.91	1146.36	1143.91	1135.73	1173	1151.91	1159.45	1147.18	1163.64	1183.82	1163.82	1148.27	1161.64	1162.73	1186.27
27	PEV (Pre-Erythrocytic Vaccine)	3	0.35	2	10	Infants	6, 10, &, 14 weeks	None	0.498525	0.69	0.85	0.85	NA	NA	5-17mo	0 yrs	None	0.5	0.69	0.85	0.85	NA	NA	None	NA	NA	NA	NA	NA	NA	NA	NA	0.4	Deaths in < 5yo per 100,000 population	228.909	229.364	227.364	221.091	222.909	223.909	218.727	224.727	227.364	229.727	226.091	224.273	230.364	217.909	227.818
27	PEV (Pre-Erythrocytic Vaccine)	3	0.35	2	10	Infants	6, 10, &, 14 weeks	None	0.498525	0.69	0.85	0.85	NA	NA	5-17mo	0 yrs	None	0.5	0.69	0.85	0.85	NA	NA	None	NA	NA	NA	NA	NA	NA	NA	NA	0.4	DALYs per 100,000 population	9573.48	9579.54	9810.47	9446.59	9501.62	9560.06	9441.3	9666.62	9734.42	9902.83	9682.52	9795.49	10009.1	9509.95	9857.88
27	PEV (Pre-Erythrocytic Vaccine)	3	0.35	2	10	Infants	6, 10, &, 14 weeks	None	0.498525	0.69	0.85	0.85	NA	NA	5-17mo	0 yrs	None	0.5	0.69	0.85	0.85	NA	NA	None	NA	NA	NA	NA	NA	NA	NA	NA	0.4	Income and productivity gains from delivering vaccine (US$ / dose)	0.190111	0.512151	0.565657	0.523823	0.470598	0.562939	0.53461	0.528797	0.397096	0.301483	0.237826	0.275434	0.172269	0.126876	0.0300228
28	PEV (Pre-Erythrocytic Vaccine)	3	0.35	2	100	Infants	6, 10, &, 14 weeks	None	0.893855	0.95	0.97	0.97	NA	NA	5-17mo	0 yrs	None	0.89	0.95	0.97	0.97	NA	NA	None	NA	NA	NA	NA	NA	NA	NA	NA	0.4	Cases per 100,000 population	109339	108764	109295	110023	110916	111756	112427	113133	113591	114043	114378	114502	114511	114826	114878
28	PEV (Pre-Erythrocytic Vaccine)	3	0.35	2	100	Infants	6, 10, &, 14 weeks	None	0.893855	0.95	0.97	0.97	NA	NA	5-17mo	0 yrs	None	0.89	0.95	0.97	0.97	NA	NA	None	NA	NA	NA	NA	NA	NA	NA	NA	0.4	Severe Cases per 100,000 population	1432.67	1483.56	1542.5	1583.22	1603	1625.39	1629.22	1630.83	1628.61	1626.67	1610.89	1640.5	1618.17	1621.33	1629.94
28	PEV (Pre-Erythrocytic Vaccine)	3	0.35	2	100	Infants	6, 10, &, 14 weeks	None	0.893855	0.95	0.97	0.97	NA	NA	5-17mo	0 yrs	None	0.89	0.95	0.97	0.97	NA	NA	None	NA	NA	NA	NA	NA	NA	NA	NA	0.4	Deaths per 100,000 population	353	352.778	353.5	371.111	361.167	368.778	366.722	363.556	364.611	373.056	371.722	374.833	371.722	368.944	370.222
28	PEV (Pre-Erythrocytic Vaccine)	3	0.35	2	100	Infants	6, 10, &, 14 weeks	None	0.893855	0.95	0.97	0.97	NA	NA	5-17mo	0 yrs	None	0.89	0.95	0.97	0.97	NA	NA	None	NA	NA	NA	NA	NA	NA	NA	NA	0.4	Cases in <5yo per 100,000 population	50606.7	50025.2	50486.2	51182.3	51336.3	51575.5	51559.8	51612.3	51603.4	51602.3	51633.9	51575.6	51541.4	51635.8	51649.4
28	PEV (Pre-Erythrocytic Vaccine)	3	0.35	2	100	Infants	6, 10, &, 14 weeks	None	0.893855	0.95	0.97	0.97	NA	NA	5-17mo	0 yrs	None	0.89	0.95	0.97	0.97	NA	NA	None	NA	NA	NA	NA	NA	NA	NA	NA	0.4	Severe Cases in <5yo per 100,000 population	1313	1365.78	1422.44	1466.83	1473.72	1487.83	1485.61	1486.44	1477.22	1477.56	1467.06	1490.17	1468.67	1475.33	1481.44
28	PEV (Pre-Erythrocytic Vaccine)	3	0.35	2	100	Infants	6, 10, &, 14 weeks	None	0.893855	0.95	0.97	0.97	NA	NA	5-17mo	0 yrs	None	0.89	0.95	0.97	0.97	NA	NA	None	NA	NA	NA	NA	NA	NA	NA	NA	0.4	Deaths in < 5yo per 100,000 population	320.722	321.333	321.167	339.056	326.778	332.389	329.833	327.389	326.556	335.722	334.556	337.889	334.278	331.389	331.667
28	PEV (Pre-Erythrocytic Vaccine)	3	0.35	2	100	Infants	6, 10, &, 14 weeks	None	0.893855	0.95	0.97	0.97	NA	NA	5-17mo	0 yrs	None	0.89	0.95	0.97	0.97	NA	NA	None	NA	NA	NA	NA	NA	NA	NA	NA	0.4	DALYs per 100,000 population	9514.11	9529.21	9544.56	10004.5	9748.51	9946.67	9913.81	9819.36	9829.74	10061.1	10033.4	10117	10033.1	9954.7	9995.96
28	PEV (Pre-Erythrocytic Vaccine)	3	0.35	2	100	Infants	6, 10, &, 14 weeks	None	0.893855	0.95	0.97	0.97	NA	NA	5-17mo	0 yrs	None	0.89	0.95	0.97	0.97	NA	NA	None	NA	NA	NA	NA	NA	NA	NA	NA	0.4	Income and productivity gains from delivering vaccine (US$ / dose)	0.225468	0.37348	0.279926	0.192567	-0.0166196	-0.196894	-0.34656	-0.506379	-0.609986	-0.703452	-0.760986	-0.816714	-0.810069	-0.859484	-0.88574
29	PEV (Pre-Erythrocytic Vaccine)	3	0.35	2	100	Infants	6, 10, &, 14 weeks	None	0.893855	0.95	0.97	0.97	NA	NA	5-17mo	0 yrs	None	0.7	0.81	0.93	0.93	NA	NA	None	NA	NA	NA	NA	NA	NA	NA	NA	0.4	Cases per 100,000 population	109522	108885	109311	109950	110837	111681	112461	113110	113687	113976	114252	114532	114742	114946	114990
29	PEV (Pre-Erythrocytic Vaccine)	3	0.35	2	100	Infants	6, 10, &, 14 weeks	None	0.893855	0.95	0.97	0.97	NA	NA	5-17mo	0 yrs	None	0.7	0.81	0.93	0.93	NA	NA	None	NA	NA	NA	NA	NA	NA	NA	NA	0.4	Severe Cases per 100,000 population	1424.16	1477.95	1545.26	1591.11	1599.5	1608.26	1621.92	1623.87	1633.18	1634.32	1620.71	1633.03	1637.32	1635.08	1634.26
29	PEV (Pre-Erythrocytic Vaccine)	3	0.35	2	100	Infants	6, 10, &, 14 weeks	None	0.893855	0.95	0.97	0.97	NA	NA	5-17mo	0 yrs	None	0.7	0.81	0.93	0.93	NA	NA	None	NA	NA	NA	NA	NA	NA	NA	NA	0.4	Deaths per 100,000 population	346.105	350.368	354.868	365.816	361.789	369.184	375.211	367.079	370.211	369.763	370.763	369.947	374.553	371.289	377.026
29	PEV (Pre-Erythrocytic Vaccine)	3	0.35	2	100	Infants	6, 10, &, 14 weeks	None	0.893855	0.95	0.97	0.97	NA	NA	5-17mo	0 yrs	None	0.7	0.81	0.93	0.93	NA	NA	None	NA	NA	NA	NA	NA	NA	NA	NA	0.4	Cases in <5yo per 100,000 population	50774.8	50087.7	50480.3	51047.9	51376.7	51563	51626.4	51663.1	51644.8	51577.7	51553.3	51606.5	51635.4	51623.6	51602
29	PEV (Pre-Erythrocytic Vaccine)	3	0.35	2	100	Infants	6, 10, &, 14 weeks	None	0.893855	0.95	0.97	0.97	NA	NA	5-17mo	0 yrs	None	0.7	0.81	0.93	0.93	NA	NA	None	NA	NA	NA	NA	NA	NA	NA	NA	0.4	Severe Cases in <5yo per 100,000 population	1308.82	1360.18	1427.34	1475.66	1470.16	1474.21	1479.76	1479.08	1482.03	1485.63	1471.05	1479.03	1486.68	1483.39	1482.97
29	PEV (Pre-Erythrocytic Vaccine)	3	0.35	2	100	Infants	6, 10, &, 14 weeks	None	0.893855	0.95	0.97	0.97	NA	NA	5-17mo	0 yrs	None	0.7	0.81	0.93	0.93	NA	NA	None	NA	NA	NA	NA	NA	NA	NA	NA	0.4	Deaths in < 5yo per 100,000 population	314.368	317.789	323.184	334.579	328.842	336.421	339.158	330.421	331.658	332.658	333.684	331.763	336.658	332.658	338.789
29	PEV (Pre-Erythrocytic Vaccine)	3	0.35	2	100	Infants	6, 10, &, 14 weeks	None	0.893855	0.95	0.97	0.97	NA	NA	5-17mo	0 yrs	None	0.7	0.81	0.93	0.93	NA	NA	None	NA	NA	NA	NA	NA	NA	NA	NA	0.4	DALYs per 100,000 population	9341.21	9450.63	9568.62	9877.17	9759.87	9960.99	10118.3	9910.72	10001.9	9974.85	10015.1	9978.92	10103.2	10025	10177.5
29	PEV (Pre-Erythrocytic Vaccine)	3	0.35	2	100	Infants	6, 10, &, 14 weeks	None	0.893855	0.95	0.97	0.97	NA	NA	5-17mo	0 yrs	None	0.7	0.81	0.93	0.93	NA	NA	None	NA	NA	NA	NA	NA	NA	NA	NA	0.4	Income and productivity gains from delivering vaccine (US$ / dose)	0.223818	0.363693	0.272846	0.182532	0.00424709	-0.169199	-0.342696	-0.487141	-0.622472	-0.697743	-0.746987	-0.813174	-0.860222	-0.901307	-0.917047
30	PEV (Pre-Erythrocytic Vaccine)	3	0.35	2	100	Infants	6, 10, &, 14 weeks	None	0.893855	0.95	0.97	0.97	NA	NA	5-17mo	0 yrs	None	0.5	0.69	0.85	0.85	NA	NA	None	NA	NA	NA	NA	NA	NA	NA	NA	0.4	Cases per 100,000 population	109615	108889	109171	109886	110682	111571	112330	112998	113586	113895	114218	114334	114589	114707	114858
30	PEV (Pre-Erythrocytic Vaccine)	3	0.35	2	100	Infants	6, 10, &, 14 weeks	None	0.893855	0.95	0.97	0.97	NA	NA	5-17mo	0 yrs	None	0.5	0.69	0.85	0.85	NA	NA	None	NA	NA	NA	NA	NA	NA	NA	NA	0.4	Severe Cases per 100,000 population	1454.79	1469.58	1522.63	1575.47	1595.26	1607.74	1606.84	1627.11	1632.05	1617.21	1618.74	1645.58	1616.11	1636.79	1631.42
30	PEV (Pre-Erythrocytic Vaccine)	3	0.35	2	100	Infants	6, 10, &, 14 weeks	None	0.893855	0.95	0.97	0.97	NA	NA	5-17mo	0 yrs	None	0.5	0.69	0.85	0.85	NA	NA	None	NA	NA	NA	NA	NA	NA	NA	NA	0.4	Deaths per 100,000 population	353	353.947	355.053	357.579	365.053	370.842	365.316	374.842	373.579	368.474	367.316	373.947	365	376.632	366.947
30	PEV (Pre-Erythrocytic Vaccine)	3	0.35	2	100	Infants	6, 10, &, 14 weeks	None	0.893855	0.95	0.97	0.97	NA	NA	5-17mo	0 yrs	None	0.5	0.69	0.85	0.85	NA	NA	None	NA	NA	NA	NA	NA	NA	NA	NA	0.4	Cases in <5yo per 100,000 population	50878.4	50157.3	50422.9	51033.1	51345.1	51587.6	51587.3	51522.1	51641.1	51564.6	51636.3	51481.9	51609.7	51562.8	51604.5
30	PEV (Pre-Erythrocytic Vaccine)	3	0.35	2	100	Infants	6, 10, &, 14 weeks	None	0.893855	0.95	0.97	0.97	NA	NA	5-17mo	0 yrs	None	0.5	0.69	0.85	0.85	NA	NA	None	NA	NA	NA	NA	NA	NA	NA	NA	0.4	Severe Cases in <5yo per 100,000 population	1333.47	1355.63	1408.58	1454.37	1466.05	1472.21	1466	1484.63	1481.47	1471.68	1466.53	1492.47	1469.37	1480.63	1484.95
30	PEV (Pre-Erythrocytic Vaccine)	3	0.35	2	100	Infants	6, 10, &, 14 weeks	None	0.893855	0.95	0.97	0.97	NA	NA	5-17mo	0 yrs	None	0.5	0.69	0.85	0.85	NA	NA	None	NA	NA	NA	NA	NA	NA	NA	NA	0.4	Deaths in < 5yo per 100,000 population	322.263	322.421	324.474	326.579	331.684	335.895	331.053	336.105	335.105	332.895	328.053	334.842	325.737	336.421	329.737
30	PEV (Pre-Erythrocytic Vaccine)	3	0.35	2	100	Infants	6, 10, &, 14 weeks	None	0.893855	0.95	0.97	0.97	NA	NA	5-17mo	0 yrs	None	0.5	0.69	0.85	0.85	NA	NA	None	NA	NA	NA	NA	NA	NA	NA	NA	0.4	DALYs per 100,000 population	9517.2	9537.86	9591.83	9661.36	9865.82	9978.97	9874.15	10110.1	10083.6	9965.47	9933.91	10076.8	9874.09	10150.5	9920.98
30	PEV (Pre-Erythrocytic Vaccine)	3	0.35	2	100	Infants	6, 10, &, 14 weeks	None	0.893855	0.95	0.97	0.97	NA	NA	5-17mo	0 yrs	None	0.5	0.69	0.85	0.85	NA	NA	None	NA	NA	NA	NA	NA	NA	NA	NA	0.4	Income and productivity gains from delivering vaccine (US$ / dose)	0.210355	0.367354	0.310348	0.201024	0.0349354	-0.140719	-0.306298	-0.478075	-0.598258	-0.676453	-0.723943	-0.793777	-0.819972	-0.84511	-0.885579
31	PEV (Pre-Erythrocytic Vaccine)	3	0.35	2	100	Infants	6, 10, &, 14 weeks	None	0.700569	0.81	0.93	0.93	NA	NA	5-17mo	0 yrs	None	0.89	0.95	0.97	0.97	NA	NA	None	NA	NA	NA	NA	NA	NA	NA	NA	0.4	Cases per 100,000 population	109503	109137	109796	110480	111099	111880	112479	112897	113330	113602	113866	114025	114081	114168	114259
31	PEV (Pre-Erythrocytic Vaccine)	3	0.35	2	100	Infants	6, 10, &, 14 weeks	None	0.700569	0.81	0.93	0.93	NA	NA	5-17mo	0 yrs	None	0.89	0.95	0.97	0.97	NA	NA	None	NA	NA	NA	NA	NA	NA	NA	NA	0.4	Severe Cases per 100,000 population	1439.11	1496.89	1554.28	1574.11	1597.17	1594.39	1605.72	1629.83	1604.78	1590.06	1609.5	1602.56	1614.5	1617.44	1623.89
31	PEV (Pre-Erythrocytic Vaccine)	3	0.35	2	100	Infants	6, 10, &, 14 weeks	None	0.700569	0.81	0.93	0.93	NA	NA	5-17mo	0 yrs	None	0.89	0.95	0.97	0.97	NA	NA	None	NA	NA	NA	NA	NA	NA	NA	NA	0.4	Deaths per 100,000 population	344.333	349.056	358.222	370.944	369.111	356.444	370.667	367.778	373.889	367.611	364.778	370.833	371.944	371.167	371.667
31	PEV (Pre-Erythrocytic Vaccine)	3	0.35	2	100	Infants	6, 10, &, 14 weeks	None	0.700569	0.81	0.93	0.93	NA	NA	5-17mo	0 yrs	None	0.89	0.95	0.97	0.97	NA	NA	None	NA	NA	NA	NA	NA	NA	NA	NA	0.4	Cases in <5yo per 100,000 population	50716.5	50432.7	51031.5	51601.8	51665.2	51847	51786.9	51838.1	51870.9	51862.8	51975.1	51894	51853.2	51889.5	51885
31	PEV (Pre-Erythrocytic Vaccine)	3	0.35	2	100	Infants	6, 10, &, 14 weeks	None	0.700569	0.81	0.93	0.93	NA	NA	5-17mo	0 yrs	None	0.89	0.95	0.97	0.97	NA	NA	None	NA	NA	NA	NA	NA	NA	NA	NA	0.4	Severe Cases in <5yo per 100,000 population	1326.39	1378.06	1441.44	1459.33	1467.22	1461	1466.56	1490.17	1461.33	1448.5	1462.67	1459.61	1472.78	1471.44	1476.5
31	PEV (Pre-Erythrocytic Vaccine)	3	0.35	2	100	Infants	6, 10, &, 14 weeks	None	0.700569	0.81	0.93	0.93	NA	NA	5-17mo	0 yrs	None	0.89	0.95	0.97	0.97	NA	NA	None	NA	NA	NA	NA	NA	NA	NA	NA	0.4	Deaths in < 5yo per 100,000 population	312.944	317.278	326.722	339.611	334.944	321.722	336.389	329.778	337.056	330.444	326.167	333.056	337.778	335.611	335
31	PEV (Pre-Erythrocytic Vaccine)	3	0.35	2	100	Infants	6, 10, &, 14 weeks	None	0.700569	0.81	0.93	0.93	NA	NA	5-17mo	0 yrs	None	0.89	0.95	0.97	0.97	NA	NA	None	NA	NA	NA	NA	NA	NA	NA	NA	0.4	DALYs per 100,000 population	9278.13	9400.39	9645.97	9984.41	9954.1	9622.37	9987.96	9916.18	10083.5	9920.3	9849.79	10012.3	10034.9	10028	10009.6
31	PEV (Pre-Erythrocytic Vaccine)	3	0.35	2	100	Infants	6, 10, &, 14 weeks	None	0.700569	0.81	0.93	0.93	NA	NA	5-17mo	0 yrs	None	0.89	0.95	0.97	0.97	NA	NA	None	NA	NA	NA	NA	NA	NA	NA	NA	0.4	Income and productivity gains from delivering vaccine (US$ / dose)	0.236576	0.400283	0.268328	0.160175	-0.0149255	-0.217214	-0.385667	-0.510379	-0.608017	-0.686843	-0.737586	-0.795936	-0.814607	-0.833652	-0.865571
32	PEV (Pre-Erythrocytic Vaccine)	3	0.35	2	100	Infants	6, 10, &, 14 weeks	None	0.700569	0.81	0.93	0.93	NA	NA	5-17mo	0 yrs	None	0.7	0.81	0.93	0.93	NA	NA	None	NA	NA	NA	NA	NA	NA	NA	NA	0.4	Cases per 100,000 population	109577	109168	109710	110393	111196	111809	112316	112937	113200	113677	113813	113914	114136	114221	114269
32	PEV (Pre-Erythrocytic Vaccine)	3	0.35	2	100	Infants	6, 10, &, 14 weeks	None	0.700569	0.81	0.93	0.93	NA	NA	5-17mo	0 yrs	None	0.7	0.81	0.93	0.93	NA	NA	None	NA	NA	NA	NA	NA	NA	NA	NA	0.4	Severe Cases per 100,000 population	1462	1507.89	1551.11	1584.07	1600.11	1601.96	1601.37	1615.37	1615.04	1598.3	1596.74	1601.59	1610.56	1598.96	1614.15
32	PEV (Pre-Erythrocytic Vaccine)	3	0.35	2	100	Infants	6, 10, &, 14 weeks	None	0.700569	0.81	0.93	0.93	NA	NA	5-17mo	0 yrs	None	0.7	0.81	0.93	0.93	NA	NA	None	NA	NA	NA	NA	NA	NA	NA	NA	0.4	Deaths per 100,000 population	350.481	355.481	364.963	366.296	365.037	365.481	364.148	364.259	373.259	367.852	368.852	365.148	371.444	362.593	369.815
32	PEV (Pre-Erythrocytic Vaccine)	3	0.35	2	100	Infants	6, 10, &, 14 weeks	None	0.700569	0.81	0.93	0.93	NA	NA	5-17mo	0 yrs	None	0.7	0.81	0.93	0.93	NA	NA	None	NA	NA	NA	NA	NA	NA	NA	NA	0.4	Cases in <5yo per 100,000 population	50899.1	50474.5	50895.5	51502	51739.8	51829.8	51762.6	51801.4	51802.6	51856.2	51855.4	51813.9	51936.1	51860.6	51906.4
32	PEV (Pre-Erythrocytic Vaccine)	3	0.35	2	100	Infants	6, 10, &, 14 weeks	None	0.700569	0.81	0.93	0.93	NA	NA	5-17mo	0 yrs	None	0.7	0.81	0.93	0.93	NA	NA	None	NA	NA	NA	NA	NA	NA	NA	NA	0.4	Severe Cases in <5yo per 100,000 population	1344.22	1388.7	1432.15	1464.15	1475	1470.48	1464.22	1474.67	1473.74	1452.41	1454.04	1456.56	1467.85	1457.41	1465.81
32	PEV (Pre-Erythrocytic Vaccine)	3	0.35	2	100	Infants	6, 10, &, 14 weeks	None	0.700569	0.81	0.93	0.93	NA	NA	5-17mo	0 yrs	None	0.7	0.81	0.93	0.93	NA	NA	None	NA	NA	NA	NA	NA	NA	NA	NA	0.4	Deaths in < 5yo per 100,000 population	319.296	324.926	332.519	334.519	331.37	331.704	327.37	328.037	336.519	330.963	333.259	328.444	336.556	325.333	331.704
32	PEV (Pre-Erythrocytic Vaccine)	3	0.35	2	100	Infants	6, 10, &, 14 weeks	None	0.700569	0.81	0.93	0.93	NA	NA	5-17mo	0 yrs	None	0.7	0.81	0.93	0.93	NA	NA	None	NA	NA	NA	NA	NA	NA	NA	NA	0.4	DALYs per 100,000 population	9453.15	9585.99	9849.12	9866.6	9851.73	9867.81	9829.17	9833.17	10076.1	9933.55	9953.53	9860.83	10016.5	9784.51	9985.66
32	PEV (Pre-Erythrocytic Vaccine)	3	0.35	2	100	Infants	6, 10, &, 14 weeks	None	0.700569	0.81	0.93	0.93	NA	NA	5-17mo	0 yrs	None	0.7	0.81	0.93	0.93	NA	NA	None	NA	NA	NA	NA	NA	NA	NA	NA	0.4	Income and productivity gains from delivering vaccine (US$ / dose)	0.236698	0.394882	0.274926	0.166054	-0.0420054	-0.200022	-0.34103	-0.52386	-0.581751	-0.703275	-0.737614	-0.776422	-0.820047	-0.832537	-0.871906
33	PEV (Pre-Erythrocytic Vaccine)	3	0.35	2	100	Infants	6, 10, &, 14 weeks	None	0.700569	0.81	0.93	0.93	NA	NA	5-17mo	0 yrs	None	0.5	0.69	0.85	0.85	NA	NA	None	NA	NA	NA	NA	NA	NA	NA	NA	0.4	Cases per 100,000 population	109787	109308	109793	110454	111004	111828	112520	113037	113365	113648	113747	114051	114211	114177	114376
33	PEV (Pre-Erythrocytic Vaccine)	3	0.35	2	100	Infants	6, 10, &, 14 weeks	None	0.700569	0.81	0.93	0.93	NA	NA	5-17mo	0 yrs	None	0.5	0.69	0.85	0.85	NA	NA	None	NA	NA	NA	NA	NA	NA	NA	NA	0.4	Severe Cases per 100,000 population	1440.67	1504.78	1545.78	1574.67	1604.78	1603.61	1608.78	1592.78	1611.06	1619.94	1632.06	1601.56	1614.22	1627.22	1606.94
33	PEV (Pre-Erythrocytic Vaccine)	3	0.35	2	100	Infants	6, 10, &, 14 weeks	None	0.700569	0.81	0.93	0.93	NA	NA	5-17mo	0 yrs	None	0.5	0.69	0.85	0.85	NA	NA	None	NA	NA	NA	NA	NA	NA	NA	NA	0.4	Deaths per 100,000 population	352.278	352.667	354.222	363.667	370.111	368.611	376.278	370.5	368.778	364.611	372.389	367.611	373.611	376.611	363.889
33	PEV (Pre-Erythrocytic Vaccine)	3	0.35	2	100	Infants	6, 10, &, 14 weeks	None	0.700569	0.81	0.93	0.93	NA	NA	5-17mo	0 yrs	None	0.5	0.69	0.85	0.85	NA	NA	None	NA	NA	NA	NA	NA	NA	NA	NA	0.4	Cases in <5yo per 100,000 population	51031.7	50544.3	51053.6	51566.9	51625.7	51879.8	51939.4	52002.1	51922.5	51897.3	51849.3	51960.2	51921.8	51855.3	51924.6
33	PEV (Pre-Erythrocytic Vaccine)	3	0.35	2	100	Infants	6, 10, &, 14 weeks	None	0.700569	0.81	0.93	0.93	NA	NA	5-17mo	0 yrs	None	0.5	0.69	0.85	0.85	NA	NA	None	NA	NA	NA	NA	NA	NA	NA	NA	0.4	Severe Cases in <5yo per 100,000 population	1328.94	1387.5	1428.28	1457.39	1477.22	1470.56	1469.39	1451.94	1465.06	1472.06	1488.72	1458.17	1471.78	1483.56	1462.78
33	PEV (Pre-Erythrocytic Vaccine)	3	0.35	2	100	Infants	6, 10, &, 14 weeks	None	0.700569	0.81	0.93	0.93	NA	NA	5-17mo	0 yrs	None	0.5	0.69	0.85	0.85	NA	NA	None	NA	NA	NA	NA	NA	NA	NA	NA	0.4	Deaths in < 5yo per 100,000 population	321.833	324.056	324.5	332.111	336.056	332.389	340.167	334.667	330.722	328.889	338.333	331.056	336.111	336.833	325.444
33	PEV (Pre-Erythrocytic Vaccine)	3	0.35	2	100	Infants	6, 10, &, 14 weeks	None	0.700569	0.81	0.93	0.93	NA	NA	5-17mo	0 yrs	None	0.5	0.69	0.85	0.85	NA	NA	None	NA	NA	NA	NA	NA	NA	NA	NA	0.4	DALYs per 100,000 population	9488.93	9530.35	9547.34	9806.09	10003.4	9949.31	10159.5	10009.4	9952.07	9834.87	10041.1	9911.05	10073.7	10157.8	9809.24
33	PEV (Pre-Erythrocytic Vaccine)	3	0.35	2	100	Infants	6, 10, &, 14 weeks	None	0.700569	0.81	0.93	0.93	NA	NA	5-17mo	0 yrs	None	0.5	0.69	0.85	0.85	NA	NA	None	NA	NA	NA	NA	NA	NA	NA	NA	0.4	Income and productivity gains from delivering vaccine (US$ / dose)	0.230015	0.363285	0.277612	0.169994	0.00723256	-0.207464	-0.393493	-0.499228	-0.611038	-0.700945	-0.734731	-0.783735	-0.842926	-0.840821	-0.88314
34	PEV (Pre-Erythrocytic Vaccine)	3	0.35	2	100	Infants	6, 10, &, 14 weeks	None	0.498525	0.69	0.85	0.85	NA	NA	5-17mo	0 yrs	None	0.89	0.95	0.97	0.97	NA	NA	None	NA	NA	NA	NA	NA	NA	NA	NA	0.4	Cases per 100,000 population	109625	109506	110262	110903	111547	112004	112585	112928	113232	113410	113649	113706	113669	113906	113862
34	PEV (Pre-Erythrocytic Vaccine)	3	0.35	2	100	Infants	6, 10, &, 14 weeks	None	0.498525	0.69	0.85	0.85	NA	NA	5-17mo	0 yrs	None	0.89	0.95	0.97	0.97	NA	NA	None	NA	NA	NA	NA	NA	NA	NA	NA	0.4	Severe Cases per 100,000 population	1436.33	1507.46	1559.83	1585.17	1580.88	1594.38	1588.38	1601.58	1598.33	1578.83	1590.17	1595.46	1592.29	1603.04	1576.46
34	PEV (Pre-Erythrocytic Vaccine)	3	0.35	2	100	Infants	6, 10, &, 14 weeks	None	0.498525	0.69	0.85	0.85	NA	NA	5-17mo	0 yrs	None	0.89	0.95	0.97	0.97	NA	NA	None	NA	NA	NA	NA	NA	NA	NA	NA	0.4	Deaths per 100,000 population	355.75	359.083	365.708	364.917	361.375	372.542	367.708	372.417	373.625	370.125	369.417	367.75	367.875	365.042	371.5
34	PEV (Pre-Erythrocytic Vaccine)	3	0.35	2	100	Infants	6, 10, &, 14 weeks	None	0.498525	0.69	0.85	0.85	NA	NA	5-17mo	0 yrs	None	0.89	0.95	0.97	0.97	NA	NA	None	NA	NA	NA	NA	NA	NA	NA	NA	0.4	Cases in <5yo per 100,000 population	50908.2	50858.8	51507.5	52041.5	52101.4	52094.6	52180.1	52192.9	52161.5	52223.4	52192.3	52118.8	52134.4	52173.3	52164
34	PEV (Pre-Erythrocytic Vaccine)	3	0.35	2	100	Infants	6, 10, &, 14 weeks	None	0.498525	0.69	0.85	0.85	NA	NA	5-17mo	0 yrs	None	0.89	0.95	0.97	0.97	NA	NA	None	NA	NA	NA	NA	NA	NA	NA	NA	0.4	Severe Cases in <5yo per 100,000 population	1321.75	1388.29	1440.46	1465.25	1451.33	1463.92	1455.17	1461.04	1461.21	1441.88	1454.62	1456.71	1452.21	1464.21	1437.96
34	PEV (Pre-Erythrocytic Vaccine)	3	0.35	2	100	Infants	6, 10, &, 14 weeks	None	0.498525	0.69	0.85	0.85	NA	NA	5-17mo	0 yrs	None	0.89	0.95	0.97	0.97	NA	NA	None	NA	NA	NA	NA	NA	NA	NA	NA	0.4	Deaths in < 5yo per 100,000 population	325	326.5	333.083	333.667	329.542	339.208	332.292	335.917	337.583	333.5	333.458	329.458	333.167	329.417	335.708
34	PEV (Pre-Erythrocytic Vaccine)	3	0.35	2	100	Infants	6, 10, &, 14 weeks	None	0.498525	0.69	0.85	0.85	NA	NA	5-17mo	0 yrs	None	0.89	0.95	0.97	0.97	NA	NA	None	NA	NA	NA	NA	NA	NA	NA	NA	0.4	DALYs per 100,000 population	9573.87	9665.12	9862.78	9864.56	9760.83	10037.3	9922.03	10034.7	10057.8	9982.65	9981.97	9906.67	9921.92	9864.62	10016.9
34	PEV (Pre-Erythrocytic Vaccine)	3	0.35	2	100	Infants	6, 10, &, 14 weeks	None	0.498525	0.69	0.85	0.85	NA	NA	5-17mo	0 yrs	None	0.89	0.95	0.97	0.97	NA	NA	None	NA	NA	NA	NA	NA	NA	NA	NA	0.4	Income and productivity gains from delivering vaccine (US$ / dose)	0.265398	0.445704	0.256713	0.127427	-0.0948071	-0.263365	-0.442623	-0.567417	-0.673965	-0.712121	-0.798126	-0.837681	-0.841172	-0.906425	-0.863665
35	PEV (Pre-Erythrocytic Vaccine)	3	0.35	2	100	Infants	6, 10, &, 14 weeks	None	0.498525	0.69	0.85	0.85	NA	NA	5-17mo	0 yrs	None	0.7	0.81	0.93	0.93	NA	NA	None	NA	NA	NA	NA	NA	NA	NA	NA	0.4	Cases per 100,000 population	109738	109606	110280	110868	111447	112088	112516	112895	113223	113402	113514	113623	113770	113859	113840
35	PEV (Pre-Erythrocytic Vaccine)	3	0.35	2	100	Infants	6, 10, &, 14 weeks	None	0.498525	0.69	0.85	0.85	NA	NA	5-17mo	0 yrs	None	0.7	0.81	0.93	0.93	NA	NA	None	NA	NA	NA	NA	NA	NA	NA	NA	0.4	Severe Cases per 100,000 population	1444.42	1507.03	1557.43	1576.08	1584.08	1584.98	1596.6	1595.48	1604.68	1588.4	1593.55	1596.22	1601.12	1596.98	1600.2
35	PEV (Pre-Erythrocytic Vaccine)	3	0.35	2	100	Infants	6, 10, &, 14 weeks	None	0.498525	0.69	0.85	0.85	NA	NA	5-17mo	0 yrs	None	0.7	0.81	0.93	0.93	NA	NA	None	NA	NA	NA	NA	NA	NA	NA	NA	0.4	Deaths per 100,000 population	349.846	360.615	364.231	363.415	363.908	364.369	371.323	367.046	369.462	371.938	369.554	369.615	368.046	369.138	372.169
35	PEV (Pre-Erythrocytic Vaccine)	3	0.35	2	100	Infants	6, 10, &, 14 weeks	None	0.498525	0.69	0.85	0.85	NA	NA	5-17mo	0 yrs	None	0.7	0.81	0.93	0.93	NA	NA	None	NA	NA	NA	NA	NA	NA	NA	NA	0.4	Cases in <5yo per 100,000 population	51022.7	50882.8	51476	52010.4	52032.3	52180	52178.6	52162.8	52202.9	52197.8	52183	52161.7	52203.6	52191.1	52157.8
35	PEV (Pre-Erythrocytic Vaccine)	3	0.35	2	100	Infants	6, 10, &, 14 weeks	None	0.498525	0.69	0.85	0.85	NA	NA	5-17mo	0 yrs	None	0.7	0.81	0.93	0.93	NA	NA	None	NA	NA	NA	NA	NA	NA	NA	NA	0.4	Severe Cases in <5yo per 100,000 population	1327.69	1389.77	1438.63	1457.89	1456.92	1454.35	1460.03	1456.31	1467.55	1450.38	1455.02	1458.11	1462.14	1461.29	1463.89
35	PEV (Pre-Erythrocytic Vaccine)	3	0.35	2	100	Infants	6, 10, &, 14 weeks	None	0.498525	0.69	0.85	0.85	NA	NA	5-17mo	0 yrs	None	0.7	0.81	0.93	0.93	NA	NA	None	NA	NA	NA	NA	NA	NA	NA	NA	0.4	Deaths in < 5yo per 100,000 population	316.815	327.862	331.477	331.415	330.862	330.385	336.554	331.123	333.6	336.754	333.646	334.569	332.8	334.508	336.462
35	PEV (Pre-Erythrocytic Vaccine)	3	0.35	2	100	Infants	6, 10, &, 14 weeks	None	0.498525	0.69	0.85	0.85	NA	NA	5-17mo	0 yrs	None	0.7	0.81	0.93	0.93	NA	NA	None	NA	NA	NA	NA	NA	NA	NA	NA	0.4	DALYs per 100,000 population	9433.71	9726.3	9816.06	9805.38	9823.16	9832.33	10005.7	9903.59	9970.17	10023.6	9965.18	9979.71	9936.42	9952.78	10039.4
35	PEV (Pre-Erythrocytic Vaccine)	3	0.35	2	100	Infants	6, 10, &, 14 weeks	None	0.498525	0.69	0.85	0.85	NA	NA	5-17mo	0 yrs	None	0.7	0.81	0.93	0.93	NA	NA	None	NA	NA	NA	NA	NA	NA	NA	NA	0.4	Income and productivity gains from delivering vaccine (US$ / dose)	0.260704	0.417704	0.247559	0.139361	-0.0718048	-0.270912	-0.43295	-0.56002	-0.675551	-0.723618	-0.753631	-0.806733	-0.842137	-0.870188	-0.884098
36	PEV (Pre-Erythrocytic Vaccine)	3	0.35	2	100	Infants	6, 10, &, 14 weeks	None	0.498525	0.69	0.85	0.85	NA	NA	5-17mo	0 yrs	None	0.5	0.69	0.85	0.85	NA	NA	None	NA	NA	NA	NA	NA	NA	NA	NA	0.4	Cases per 100,000 population	109923	109806	110309	110855	111416	111973	112463	112835	113110	113441	113542	113710	113773	113930	113909
36	PEV (Pre-Erythrocytic Vaccine)	3	0.35	2	100	Infants	6, 10, &, 14 weeks	None	0.498525	0.69	0.85	0.85	NA	NA	5-17mo	0 yrs	None	0.5	0.69	0.85	0.85	NA	NA	None	NA	NA	NA	NA	NA	NA	NA	NA	0.4	Severe Cases per 100,000 population	1453.78	1502.1	1539.73	1570.71	1574.12	1598.61	1595.27	1594.46	1596.34	1595.46	1591.41	1596.98	1589.24	1587.59	1598.98
36	PEV (Pre-Erythrocytic Vaccine)	3	0.35	2	100	Infants	6, 10, &, 14 weeks	None	0.498525	0.69	0.85	0.85	NA	NA	5-17mo	0 yrs	None	0.5	0.69	0.85	0.85	NA	NA	None	NA	NA	NA	NA	NA	NA	NA	NA	0.4	Deaths per 100,000 population	352.659	352.756	354.366	364.171	364.756	367.122	371.902	366.659	370.805	369.927	364.878	364.805	374.317	369.268	371.22
36	PEV (Pre-Erythrocytic Vaccine)	3	0.35	2	100	Infants	6, 10, &, 14 weeks	None	0.498525	0.69	0.85	0.85	NA	NA	5-17mo	0 yrs	None	0.5	0.69	0.85	0.85	NA	NA	None	NA	NA	NA	NA	NA	NA	NA	NA	0.4	Cases in <5yo per 100,000 population	51195.7	51037.6	51461	51982	52010.3	52107.5	52187.7	52174.9	52185.2	52216.1	52150.5	52166.1	52162.5	52240.7	52203
36	PEV (Pre-Erythrocytic Vaccine)	3	0.35	2	100	Infants	6, 10, &, 14 weeks	None	0.498525	0.69	0.85	0.85	NA	NA	5-17mo	0 yrs	None	0.5	0.69	0.85	0.85	NA	NA	None	NA	NA	NA	NA	NA	NA	NA	NA	0.4	Severe Cases in <5yo per 100,000 population	1338.78	1386.02	1421.2	1451.85	1446.66	1464.17	1460.71	1458.51	1457.32	1457.29	1452.59	1458.49	1452.56	1450.93	1460.54
36	PEV (Pre-Erythrocytic Vaccine)	3	0.35	2	100	Infants	6, 10, &, 14 weeks	None	0.498525	0.69	0.85	0.85	NA	NA	5-17mo	0 yrs	None	0.5	0.69	0.85	0.85	NA	NA	None	NA	NA	NA	NA	NA	NA	NA	NA	0.4	Deaths in < 5yo per 100,000 population	321.317	321.707	321.171	332.341	330.317	334.122	336.073	334	335.585	335.073	329.293	328.878	338.244	334.707	335.78
36	PEV (Pre-Erythrocytic Vaccine)	3	0.35	2	100	Infants	6, 10, &, 14 weeks	None	0.498525	0.69	0.85	0.85	NA	NA	5-17mo	0 yrs	None	0.5	0.69	0.85	0.85	NA	NA	None	NA	NA	NA	NA	NA	NA	NA	NA	0.4	DALYs per 100,000 population	9499.74	9514.26	9557.45	9834.22	9836.61	9899.34	10010	9883.62	10010.4	9971.7	9845.2	9848.17	10085.5	9961.95	10003.3
36	PEV (Pre-Erythrocytic Vaccine)	3	0.35	2	100	Infants	6, 10, &, 14 weeks	None	0.498525	0.69	0.85	0.85	NA	NA	5-17mo	0 yrs	None	0.5	0.69	0.85	0.85	NA	NA	None	NA	NA	NA	NA	NA	NA	NA	NA	0.4	Income and productivity gains from delivering vaccine (US$ / dose)	0.244479	0.376236	0.247754	0.142144	-0.0627786	-0.263713	-0.410648	-0.530809	-0.639797	-0.743568	-0.776488	-0.834673	-0.84491	-0.877533	-0.896291
37	PEV (Pre-Erythrocytic Vaccine)	3	0.35	4	0.1	Infants	6, 10, &, 14 weeks	None	0.893855	0.95	0.97	0.97	NA	NA	5-17mo	0 yrs	None	0.89	0.95	0.97	0.97	NA	NA	None	NA	NA	NA	NA	NA	NA	NA	NA	0.4	Cases per 100,000 population	8609.27	8536.29	8483.68	8371.72	8327.7	8290.84	8198.5	8122.91	8048.35	7989.22	7959.28	7932.63	7924.58	7972.36	7889.38
37	PEV (Pre-Erythrocytic Vaccine)	3	0.35	4	0.1	Infants	6, 10, &, 14 weeks	None	0.893855	0.95	0.97	0.97	NA	NA	5-17mo	0 yrs	None	0.89	0.95	0.97	0.97	NA	NA	None	NA	NA	NA	NA	NA	NA	NA	NA	0.4	Severe Cases per 100,000 population	149.491	146.182	144.191	144.082	142.145	138.755	139.082	135.418	138.236	135.682	136.391	136.545	134.764	138.245	139.127
37	PEV (Pre-Erythrocytic Vaccine)	3	0.35	4	0.1	Infants	6, 10, &, 14 weeks	None	0.893855	0.95	0.97	0.97	NA	NA	5-17mo	0 yrs	None	0.89	0.95	0.97	0.97	NA	NA	None	NA	NA	NA	NA	NA	NA	NA	NA	0.4	Deaths per 100,000 population	30.8545	29.4	30.5545	30.2545	29.4545	29.3	29.4818	29.1636	28.9091	28.1364	28.0273	28.7455	28.6	28.6	28.1091
37	PEV (Pre-Erythrocytic Vaccine)	3	0.35	4	0.1	Infants	6, 10, &, 14 weeks	None	0.893855	0.95	0.97	0.97	NA	NA	5-17mo	0 yrs	None	0.89	0.95	0.97	0.97	NA	NA	None	NA	NA	NA	NA	NA	NA	NA	NA	0.4	Cases in <5yo per 100,000 population	661.655	610.545	575.209	537.627	534.6	522.291	520.536	518.027	512.918	506.536	503.436	501.055	500.973	509.055	505.673
37	PEV (Pre-Erythrocytic Vaccine)	3	0.35	4	0.1	Infants	6, 10, &, 14 weeks	None	0.893855	0.95	0.97	0.97	NA	NA	5-17mo	0 yrs	None	0.89	0.95	0.97	0.97	NA	NA	None	NA	NA	NA	NA	NA	NA	NA	NA	0.4	Severe Cases in <5yo per 100,000 population	34.1727	32.0182	29.7182	28.6909	27.1818	26.6	26.3455	26.6	27.0545	26.1545	26.9545	26.8455	26.2273	26.9	27.2273
37	PEV (Pre-Erythrocytic Vaccine)	3	0.35	4	0.1	Infants	6, 10, &, 14 weeks	None	0.893855	0.95	0.97	0.97	NA	NA	5-17mo	0 yrs	None	0.89	0.95	0.97	0.97	NA	NA	None	NA	NA	NA	NA	NA	NA	NA	NA	0.4	Deaths in < 5yo per 100,000 population	8.03636	7.96364	7.47273	7.61818	7.30909	6.92727	7.43636	7.12727	7.33636	7.20909	7.14545	7.53636	7.17273	6.88182	7.14545
37	PEV (Pre-Erythrocytic Vaccine)	3	0.35	4	0.1	Infants	6, 10, &, 14 weeks	None	0.893855	0.95	0.97	0.97	NA	NA	5-17mo	0 yrs	None	0.89	0.95	0.97	0.97	NA	NA	None	NA	NA	NA	NA	NA	NA	NA	NA	0.4	DALYs per 100,000 population	782.701	751.293	780.918	772.355	747.398	744.902	752.459	741.629	736.898	715.63	711.23	730.341	727.761	726.082	714.617
37	PEV (Pre-Erythrocytic Vaccine)	3	0.35	4	0.1	Infants	6, 10, &, 14 weeks	None	0.893855	0.95	0.97	0.97	NA	NA	5-17mo	0 yrs	None	0.89	0.95	0.97	0.97	NA	NA	None	NA	NA	NA	NA	NA	NA	NA	NA	0.4	Income and productivity gains from delivering vaccine (US$ / dose)	-0.0026646	0.00752691	0.0177941	0.0396352	0.0509684	0.0588848	0.0795834	0.0965981	0.109784	0.123674	0.130904	0.135968	0.141627	0.128848	0.145393
38	PEV (Pre-Erythrocytic Vaccine)	3	0.35	4	0.1	Infants	6, 10, &, 14 weeks	None	0.893855	0.95	0.97	0.97	NA	NA	5-17mo	0 yrs	None	0.7	0.81	0.93	0.93	NA	NA	None	NA	NA	NA	NA	NA	NA	NA	NA	0.4	Cases per 100,000 population	8564.46	8470.55	8441.76	8394.33	8325.98	8251.57	8173.65	8177.8	8003.55	8063.8	8054.77	7958.22	7896.28	7937.29	7853.59
38	PEV (Pre-Erythrocytic Vaccine)	3	0.35	4	0.1	Infants	6, 10, &, 14 weeks	None	0.893855	0.95	0.97	0.97	NA	NA	5-17mo	0 yrs	None	0.7	0.81	0.93	0.93	NA	NA	None	NA	NA	NA	NA	NA	NA	NA	NA	0.4	Severe Cases per 100,000 population	148.809	145.836	145.918	141.9	142.418	140.118	138.882	137.555	134.845	137.436	137.809	136.109	136.373	138.182	136.791
38	PEV (Pre-Erythrocytic Vaccine)	3	0.35	4	0.1	Infants	6, 10, &, 14 weeks	None	0.893855	0.95	0.97	0.97	NA	NA	5-17mo	0 yrs	None	0.7	0.81	0.93	0.93	NA	NA	None	NA	NA	NA	NA	NA	NA	NA	NA	0.4	Deaths per 100,000 population	30.4545	30.8364	30.7364	29.5455	29.2182	28.8273	29.0273	28.2182	28.4	28.9273	28.9727	27.9	29.7909	28.4273	29.1273
38	PEV (Pre-Erythrocytic Vaccine)	3	0.35	4	0.1	Infants	6, 10, &, 14 weeks	None	0.893855	0.95	0.97	0.97	NA	NA	5-17mo	0 yrs	None	0.7	0.81	0.93	0.93	NA	NA	None	NA	NA	NA	NA	NA	NA	NA	NA	0.4	Cases in <5yo per 100,000 population	665.245	608.627	571.973	541.873	536.3	524.245	520.264	522.818	505.991	515	513.173	506.364	497.182	504.318	493.991
38	PEV (Pre-Erythrocytic Vaccine)	3	0.35	4	0.1	Infants	6, 10, &, 14 weeks	None	0.893855	0.95	0.97	0.97	NA	NA	5-17mo	0 yrs	None	0.7	0.81	0.93	0.93	NA	NA	None	NA	NA	NA	NA	NA	NA	NA	NA	0.4	Severe Cases in <5yo per 100,000 population	34.4818	30.9818	29.0636	27.8545	28.2364	27.2818	28.2182	27.0091	26.1	27.2	27.5091	26.8091	27.0909	26.9	25.7364
38	PEV (Pre-Erythrocytic Vaccine)	3	0.35	4	0.1	Infants	6, 10, &, 14 weeks	None	0.893855	0.95	0.97	0.97	NA	NA	5-17mo	0 yrs	None	0.7	0.81	0.93	0.93	NA	NA	None	NA	NA	NA	NA	NA	NA	NA	NA	0.4	Deaths in < 5yo per 100,000 population	8.05455	7.55455	7.84545	7.23636	7.48182	7.14545	7.58182	7.08182	7.18182	6.92727	7.22727	6.92727	7.51818	7.33636	6.97273
38	PEV (Pre-Erythrocytic Vaccine)	3	0.35	4	0.1	Infants	6, 10, &, 14 weeks	None	0.893855	0.95	0.97	0.97	NA	NA	5-17mo	0 yrs	None	0.7	0.81	0.93	0.93	NA	NA	None	NA	NA	NA	NA	NA	NA	NA	NA	0.4	DALYs per 100,000 population	775.849	781.914	781.346	752.68	745.558	733.458	739.464	715.854	720.477	733.358	734.975	709.978	752.891	725.999	736.137
38	PEV (Pre-Erythrocytic Vaccine)	3	0.35	4	0.1	Infants	6, 10, &, 14 weeks	None	0.893855	0.95	0.97	0.97	NA	NA	5-17mo	0 yrs	None	0.7	0.81	0.93	0.93	NA	NA	None	NA	NA	NA	NA	NA	NA	NA	NA	0.4	Income and productivity gains from delivering vaccine (US$ / dose)	0.00369081	0.0234077	0.0267624	0.0353242	0.0510761	0.0678947	0.0849575	0.0832316	0.119385	0.106212	0.109787	0.131449	0.145899	0.133802	0.154338
39	PEV (Pre-Erythrocytic Vaccine)	3	0.35	4	0.1	Infants	6, 10, &, 14 weeks	None	0.893855	0.95	0.97	0.97	NA	NA	5-17mo	0 yrs	None	0.5	0.69	0.85	0.85	NA	NA	None	NA	NA	NA	NA	NA	NA	NA	NA	0.4	Cases per 100,000 population	8588.3	8475.15	8423.79	8381.9	8336.94	8272.95	8175.27	8150.85	8110.21	8076.63	8074.93	8032.34	7933.28	7949.8	7885.16
39	PEV (Pre-Erythrocytic Vaccine)	3	0.35	4	0.1	Infants	6, 10, &, 14 weeks	None	0.893855	0.95	0.97	0.97	NA	NA	5-17mo	0 yrs	None	0.5	0.69	0.85	0.85	NA	NA	None	NA	NA	NA	NA	NA	NA	NA	NA	0.4	Severe Cases per 100,000 population	149.564	147.345	143.255	142.282	142.118	140.109	138.318	137.482	137.1	137.073	138.155	140.127	137.8	137.691	138.173
39	PEV (Pre-Erythrocytic Vaccine)	3	0.35	4	0.1	Infants	6, 10, &, 14 weeks	None	0.893855	0.95	0.97	0.97	NA	NA	5-17mo	0 yrs	None	0.5	0.69	0.85	0.85	NA	NA	None	NA	NA	NA	NA	NA	NA	NA	NA	0.4	Deaths per 100,000 population	31.0818	29.9818	29.8727	29.5182	29.0636	29.9091	28.2091	28.0545	29.0455	29.1545	29.0818	28.5455	28.8455	29.6	28.7727
39	PEV (Pre-Erythrocytic Vaccine)	3	0.35	4	0.1	Infants	6, 10, &, 14 weeks	None	0.893855	0.95	0.97	0.97	NA	NA	5-17mo	0 yrs	None	0.5	0.69	0.85	0.85	NA	NA	None	NA	NA	NA	NA	NA	NA	NA	NA	0.4	Cases in <5yo per 100,000 population	665.145	619.773	576.836	546.818	531.736	525.527	518.436	522.545	517.145	517.2	513.045	514.473	501.409	510.391	502.9
39	PEV (Pre-Erythrocytic Vaccine)	3	0.35	4	0.1	Infants	6, 10, &, 14 weeks	None	0.893855	0.95	0.97	0.97	NA	NA	5-17mo	0 yrs	None	0.5	0.69	0.85	0.85	NA	NA	None	NA	NA	NA	NA	NA	NA	NA	NA	0.4	Severe Cases in <5yo per 100,000 population	34.6273	31.8909	29.5545	28.0909	27.9818	26.5364	27.6455	26.8273	27.1545	26.9273	26.2364	26.3	26.1818	25.7	26.6818
39	PEV (Pre-Erythrocytic Vaccine)	3	0.35	4	0.1	Infants	6, 10, &, 14 weeks	None	0.893855	0.95	0.97	0.97	NA	NA	5-17mo	0 yrs	None	0.5	0.69	0.85	0.85	NA	NA	None	NA	NA	NA	NA	NA	NA	NA	NA	0.4	Deaths in < 5yo per 100,000 population	8.03636	7.90909	7.51818	6.65455	7.14545	7.17273	7.14545	6.75455	6.71818	7.10909	7	6.77273	6.9	7.24545	7.11818
39	PEV (Pre-Erythrocytic Vaccine)	3	0.35	4	0.1	Infants	6, 10, &, 14 weeks	None	0.893855	0.95	0.97	0.97	NA	NA	5-17mo	0 yrs	None	0.5	0.69	0.85	0.85	NA	NA	None	NA	NA	NA	NA	NA	NA	NA	NA	0.4	DALYs per 100,000 population	788.641	768.335	762.978	749.78	737.64	757.385	720.909	716.155	734.433	743.205	737.321	724.766	733.54	749.016	730.868
39	PEV (Pre-Erythrocytic Vaccine)	3	0.35	4	0.1	Infants	6, 10, &, 14 weeks	None	0.893855	0.95	0.97	0.97	NA	NA	5-17mo	0 yrs	None	0.5	0.69	0.85	0.85	NA	NA	None	NA	NA	NA	NA	NA	NA	NA	NA	0.4	Income and productivity gains from delivering vaccine (US$ / dose)	-0.000517226	0.021876	0.0325124	0.0392796	0.0485413	0.0636844	0.0844555	0.0895984	0.0972675	0.103804	0.104408	0.113411	0.137856	0.133898	0.146139
40	PEV (Pre-Erythrocytic Vaccine)	3	0.35	4	0.1	Infants	6, 10, &, 14 weeks	None	0.700569	0.81	0.93	0.93	NA	NA	5-17mo	0 yrs	None	0.89	0.95	0.97	0.97	NA	NA	None	NA	NA	NA	NA	NA	NA	NA	NA	0.4	Cases per 100,000 population	8594.58	8491.65	8454.22	8386.12	8347.47	8351.33	8311.35	8222.92	8141.01	8089.91	8065.32	8074.89	8077.34	8032.02	8016.35
40	PEV (Pre-Erythrocytic Vaccine)	3	0.35	4	0.1	Infants	6, 10, &, 14 weeks	None	0.700569	0.81	0.93	0.93	NA	NA	5-17mo	0 yrs	None	0.89	0.95	0.97	0.97	NA	NA	None	NA	NA	NA	NA	NA	NA	NA	NA	0.4	Severe Cases per 100,000 population	150.127	147.045	145.264	143.282	140.655	143.2	142.264	140.455	141.009	137.045	138.109	140.936	138.1	142.282	139.245
40	PEV (Pre-Erythrocytic Vaccine)	3	0.35	4	0.1	Infants	6, 10, &, 14 weeks	None	0.700569	0.81	0.93	0.93	NA	NA	5-17mo	0 yrs	None	0.89	0.95	0.97	0.97	NA	NA	None	NA	NA	NA	NA	NA	NA	NA	NA	0.4	Deaths per 100,000 population	31.4	30.0727	29.5818	29.9	30.2909	29.7091	29.6636	29.4	29.6091	28.0818	28.2364	29.0182	29.5091	29.8909	29.5727
40	PEV (Pre-Erythrocytic Vaccine)	3	0.35	4	0.1	Infants	6, 10, &, 14 weeks	None	0.700569	0.81	0.93	0.93	NA	NA	5-17mo	0 yrs	None	0.89	0.95	0.97	0.97	NA	NA	None	NA	NA	NA	NA	NA	NA	NA	NA	0.4	Cases in <5yo per 100,000 population	653.945	608.018	587.982	564.891	560.173	557.327	554.982	554.373	543.1	535.118	535.245	536.564	542.136	535.4	538.1
40	PEV (Pre-Erythrocytic Vaccine)	3	0.35	4	0.1	Infants	6, 10, &, 14 weeks	None	0.700569	0.81	0.93	0.93	NA	NA	5-17mo	0 yrs	None	0.89	0.95	0.97	0.97	NA	NA	None	NA	NA	NA	NA	NA	NA	NA	NA	0.4	Severe Cases in <5yo per 100,000 population	34.4091	31	30.1636	29.7727	28.8727	29.6545	28.5	29.1727	28.1818	28.8091	28.4	28.0818	27.2	28.6182	28.1091
40	PEV (Pre-Erythrocytic Vaccine)	3	0.35	4	0.1	Infants	6, 10, &, 14 weeks	None	0.700569	0.81	0.93	0.93	NA	NA	5-17mo	0 yrs	None	0.89	0.95	0.97	0.97	NA	NA	None	NA	NA	NA	NA	NA	NA	NA	NA	0.4	Deaths in < 5yo per 100,000 population	8.41818	7.60909	7.55455	7.73636	7.65455	7.32727	7.29091	7.24545	7.28182	7.38182	7.27273	7.37273	6.94545	7.01818	7.52727
40	PEV (Pre-Erythrocytic Vaccine)	3	0.35	4	0.1	Infants	6, 10, &, 14 weeks	None	0.700569	0.81	0.93	0.93	NA	NA	5-17mo	0 yrs	None	0.89	0.95	0.97	0.97	NA	NA	None	NA	NA	NA	NA	NA	NA	NA	NA	0.4	DALYs per 100,000 population	798.992	764.566	758.421	760.652	764.997	753.218	751.008	747.14	750.212	713.034	718.184	731.918	747.871	754.528	752.707
40	PEV (Pre-Erythrocytic Vaccine)	3	0.35	4	0.1	Infants	6, 10, &, 14 weeks	None	0.700569	0.81	0.93	0.93	NA	NA	5-17mo	0 yrs	None	0.89	0.95	0.97	0.97	NA	NA	None	NA	NA	NA	NA	NA	NA	NA	NA	0.4	Income and productivity gains from delivering vaccine (US$ / dose)	-0.00282441	0.0222994	0.0313345	0.0493978	0.0631213	0.0561015	0.0691846	0.0902721	0.108495	0.125896	0.133499	0.129802	0.13262	0.139279	0.146682
41	PEV (Pre-Erythrocytic Vaccine)	3	0.35	4	0.1	Infants	6, 10, &, 14 weeks	None	0.700569	0.81	0.93	0.93	NA	NA	5-17mo	0 yrs	None	0.7	0.81	0.93	0.93	NA	NA	None	NA	NA	NA	NA	NA	NA	NA	NA	0.4	Cases per 100,000 population	8594.5	8525.77	8445.11	8344.89	8270.06	8276.72	8310.23	8129.99	8154.66	8123.48	8063.8	8038.73	8030.47	8058.98	8082.06
41	PEV (Pre-Erythrocytic Vaccine)	3	0.35	4	0.1	Infants	6, 10, &, 14 weeks	None	0.700569	0.81	0.93	0.93	NA	NA	5-17mo	0 yrs	None	0.7	0.81	0.93	0.93	NA	NA	None	NA	NA	NA	NA	NA	NA	NA	NA	0.4	Severe Cases per 100,000 population	149.545	147.882	144.473	144.555	141.355	141.745	142.336	137.209	138.655	141.191	138.809	138.6	139	140.291	141.482
41	PEV (Pre-Erythrocytic Vaccine)	3	0.35	4	0.1	Infants	6, 10, &, 14 weeks	None	0.700569	0.81	0.93	0.93	NA	NA	5-17mo	0 yrs	None	0.7	0.81	0.93	0.93	NA	NA	None	NA	NA	NA	NA	NA	NA	NA	NA	0.4	Deaths per 100,000 population	31.8364	30.5273	29.7273	29.4364	29.5182	29.8909	29.8636	28.9	29.7364	29.2545	28.9636	29.3364	28.9364	28.4909	30.0182
41	PEV (Pre-Erythrocytic Vaccine)	3	0.35	4	0.1	Infants	6, 10, &, 14 weeks	None	0.700569	0.81	0.93	0.93	NA	NA	5-17mo	0 yrs	None	0.7	0.81	0.93	0.93	NA	NA	None	NA	NA	NA	NA	NA	NA	NA	NA	0.4	Cases in <5yo per 100,000 population	660.382	613.991	589.555	558.791	559.445	551.464	559.055	543.145	547.964	547.191	535.473	538.509	536.382	540.582	536.964
41	PEV (Pre-Erythrocytic Vaccine)	3	0.35	4	0.1	Infants	6, 10, &, 14 weeks	None	0.700569	0.81	0.93	0.93	NA	NA	5-17mo	0 yrs	None	0.7	0.81	0.93	0.93	NA	NA	None	NA	NA	NA	NA	NA	NA	NA	NA	0.4	Severe Cases in <5yo per 100,000 population	33.3364	31.6091	30.4545	29.9818	28.7545	28.1545	29.0091	27.7091	28.4909	29.4818	28.1909	28.1182	28.4	28.3	28.4273
41	PEV (Pre-Erythrocytic Vaccine)	3	0.35	4	0.1	Infants	6, 10, &, 14 weeks	None	0.700569	0.81	0.93	0.93	NA	NA	5-17mo	0 yrs	None	0.7	0.81	0.93	0.93	NA	NA	None	NA	NA	NA	NA	NA	NA	NA	NA	0.4	Deaths in < 5yo per 100,000 population	8.56364	7.48182	7.54545	7.65455	7.45455	7.53636	7.42727	8.05455	7.61818	7.49091	7.43636	7.32727	6.98182	6.95455	7.42727
41	PEV (Pre-Erythrocytic Vaccine)	3	0.35	4	0.1	Infants	6, 10, &, 14 weeks	None	0.700569	0.81	0.93	0.93	NA	NA	5-17mo	0 yrs	None	0.7	0.81	0.93	0.93	NA	NA	None	NA	NA	NA	NA	NA	NA	NA	NA	0.4	DALYs per 100,000 population	810.387	774.342	756.977	748.63	751.791	762.815	756.233	734.134	758.998	743.005	736.398	747.357	732.7	726.088	764.006
41	PEV (Pre-Erythrocytic Vaccine)	3	0.35	4	0.1	Infants	6, 10, &, 14 weeks	None	0.700569	0.81	0.93	0.93	NA	NA	5-17mo	0 yrs	None	0.7	0.81	0.93	0.93	NA	NA	None	NA	NA	NA	NA	NA	NA	NA	NA	0.4	Income and productivity gains from delivering vaccine (US$ / dose)	-0.00156875	0.012635	0.0335609	0.0573263	0.0828374	0.0772841	0.0699113	0.117989	0.109187	0.116002	0.133226	0.141329	0.142832	0.133486	0.127803
42	PEV (Pre-Erythrocytic Vaccine)	3	0.35	4	0.1	Infants	6, 10, &, 14 weeks	None	0.700569	0.81	0.93	0.93	NA	NA	5-17mo	0 yrs	None	0.5	0.69	0.85	0.85	NA	NA	None	NA	NA	NA	NA	NA	NA	NA	NA	0.4	Cases per 100,000 population	8565.47	8538.17	8498.79	8428.95	8349.07	8272.71	8211.94	8159.34	8104.08	8053.66	8037.57	8030.97	8061.94	8087.59	8075.62
42	PEV (Pre-Erythrocytic Vaccine)	3	0.35	4	0.1	Infants	6, 10, &, 14 weeks	None	0.700569	0.81	0.93	0.93	NA	NA	5-17mo	0 yrs	None	0.5	0.69	0.85	0.85	NA	NA	None	NA	NA	NA	NA	NA	NA	NA	NA	0.4	Severe Cases per 100,000 population	150.155	149.109	144.273	145.691	142.636	140.327	138.491	137.882	139.291	138.427	137.527	138.873	138.491	138.918	140.418
42	PEV (Pre-Erythrocytic Vaccine)	3	0.35	4	0.1	Infants	6, 10, &, 14 weeks	None	0.700569	0.81	0.93	0.93	NA	NA	5-17mo	0 yrs	None	0.5	0.69	0.85	0.85	NA	NA	None	NA	NA	NA	NA	NA	NA	NA	NA	0.4	Deaths per 100,000 population	31.6182	30.2091	30.0091	30.4545	29.7909	29.2	29.1545	29.5818	29.2727	29.7636	28.1727	28.2636	28.9636	28.8455	29.6
42	PEV (Pre-Erythrocytic Vaccine)	3	0.35	4	0.1	Infants	6, 10, &, 14 weeks	None	0.700569	0.81	0.93	0.93	NA	NA	5-17mo	0 yrs	None	0.5	0.69	0.85	0.85	NA	NA	None	NA	NA	NA	NA	NA	NA	NA	NA	0.4	Cases in <5yo per 100,000 population	668.218	628.464	598.436	566.755	565.755	550.027	553.164	546.536	541.7	540.036	532.936	539.973	539.655	538	540.836
42	PEV (Pre-Erythrocytic Vaccine)	3	0.35	4	0.1	Infants	6, 10, &, 14 weeks	None	0.700569	0.81	0.93	0.93	NA	NA	5-17mo	0 yrs	None	0.5	0.69	0.85	0.85	NA	NA	None	NA	NA	NA	NA	NA	NA	NA	NA	0.4	Severe Cases in <5yo per 100,000 population	34.5455	32.6182	30.8182	29.9636	29.0818	28.6636	28.6545	27.4545	28.5727	28.3727	27.6818	28.4909	28.0727	28.8545	28.2545
42	PEV (Pre-Erythrocytic Vaccine)	3	0.35	4	0.1	Infants	6, 10, &, 14 weeks	None	0.700569	0.81	0.93	0.93	NA	NA	5-17mo	0 yrs	None	0.5	0.69	0.85	0.85	NA	NA	None	NA	NA	NA	NA	NA	NA	NA	NA	0.4	Deaths in < 5yo per 100,000 population	8.52727	7.70909	8.07273	7.46364	7.7	7.36364	7.92727	7.39091	7.28182	7.55455	7.50909	7.38182	7.05455	7.30909	7.36364
42	PEV (Pre-Erythrocytic Vaccine)	3	0.35	4	0.1	Infants	6, 10, &, 14 weeks	None	0.700569	0.81	0.93	0.93	NA	NA	5-17mo	0 yrs	None	0.5	0.69	0.85	0.85	NA	NA	None	NA	NA	NA	NA	NA	NA	NA	NA	0.4	DALYs per 100,000 population	804.094	772.11	767.714	779.835	754.942	739.274	740.157	747.126	740.765	755.541	720.698	720.46	734.495	731.066	751.309
42	PEV (Pre-Erythrocytic Vaccine)	3	0.35	4	0.1	Infants	6, 10, &, 14 weeks	None	0.700569	0.81	0.93	0.93	NA	NA	5-17mo	0 yrs	None	0.5	0.69	0.85	0.85	NA	NA	None	NA	NA	NA	NA	NA	NA	NA	NA	0.4	Income and productivity gains from delivering vaccine (US$ / dose)	0.00452459	0.0105167	0.0206592	0.0342274	0.0591139	0.0793994	0.0992395	0.108961	0.1204	0.134325	0.139636	0.143483	0.135007	0.126794	0.129612
43	PEV (Pre-Erythrocytic Vaccine)	3	0.35	4	0.1	Infants	6, 10, &, 14 weeks	None	0.498525	0.69	0.85	0.85	NA	NA	5-17mo	0 yrs	None	0.89	0.95	0.97	0.97	NA	NA	None	NA	NA	NA	NA	NA	NA	NA	NA	0.4	Cases per 100,000 population	8546.85	8456.3	8415.11	8363.46	8334.86	8373.57	8330.48	8316.37	8251.7	8174.89	8156.62	8190.56	8192.46	8173.49	8158.11
43	PEV (Pre-Erythrocytic Vaccine)	3	0.35	4	0.1	Infants	6, 10, &, 14 weeks	None	0.498525	0.69	0.85	0.85	NA	NA	5-17mo	0 yrs	None	0.89	0.95	0.97	0.97	NA	NA	None	NA	NA	NA	NA	NA	NA	NA	NA	0.4	Severe Cases per 100,000 population	149.909	145.736	147.218	142.509	142.655	142.973	144.455	142.264	141.355	142.982	140.136	143.527	142.873	141.882	142.627
43	PEV (Pre-Erythrocytic Vaccine)	3	0.35	4	0.1	Infants	6, 10, &, 14 weeks	None	0.498525	0.69	0.85	0.85	NA	NA	5-17mo	0 yrs	None	0.89	0.95	0.97	0.97	NA	NA	None	NA	NA	NA	NA	NA	NA	NA	NA	0.4	Deaths per 100,000 population	30.3091	31.1545	31.3182	30.2455	30.1636	29.9182	30	30.4182	29.8	30.1909	29.3909	29.9273	29.3364	30.2182	29.5
43	PEV (Pre-Erythrocytic Vaccine)	3	0.35	4	0.1	Infants	6, 10, &, 14 weeks	None	0.498525	0.69	0.85	0.85	NA	NA	5-17mo	0 yrs	None	0.89	0.95	0.97	0.97	NA	NA	None	NA	NA	NA	NA	NA	NA	NA	NA	0.4	Cases in <5yo per 100,000 population	659.955	617.527	595.091	573.318	586.509	579.627	583.173	585.273	577.273	568.073	569.245	577.609	568.855	567.964	566.755
43	PEV (Pre-Erythrocytic Vaccine)	3	0.35	4	0.1	Infants	6, 10, &, 14 weeks	None	0.498525	0.69	0.85	0.85	NA	NA	5-17mo	0 yrs	None	0.89	0.95	0.97	0.97	NA	NA	None	NA	NA	NA	NA	NA	NA	NA	NA	0.4	Severe Cases in <5yo per 100,000 population	34.2636	31.3455	31.1364	29.4182	30.4818	30.4727	31.4818	30.2636	29.6273	30.1273	28.8091	30.7182	29.8273	29.4545	29.1727
43	PEV (Pre-Erythrocytic Vaccine)	3	0.35	4	0.1	Infants	6, 10, &, 14 weeks	None	0.498525	0.69	0.85	0.85	NA	NA	5-17mo	0 yrs	None	0.89	0.95	0.97	0.97	NA	NA	None	NA	NA	NA	NA	NA	NA	NA	NA	0.4	Deaths in < 5yo per 100,000 population	7.74545	8.08182	7.8	7.68182	7.65455	7.63636	7.74545	7.47273	7.38182	7.89091	7.3	8.04545	7.45455	7.41818	7.63636
43	PEV (Pre-Erythrocytic Vaccine)	3	0.35	4	0.1	Infants	6, 10, &, 14 weeks	None	0.498525	0.69	0.85	0.85	NA	NA	5-17mo	0 yrs	None	0.89	0.95	0.97	0.97	NA	NA	None	NA	NA	NA	NA	NA	NA	NA	NA	0.4	DALYs per 100,000 population	773.695	789.508	792.822	765.164	763.418	759.983	765.961	770.489	760.05	762.859	745.664	762.497	744.232	764.067	752.569
43	PEV (Pre-Erythrocytic Vaccine)	3	0.35	4	0.1	Infants	6, 10, &, 14 weeks	None	0.498525	0.69	0.85	0.85	NA	NA	5-17mo	0 yrs	None	0.89	0.95	0.97	0.97	NA	NA	None	NA	NA	NA	NA	NA	NA	NA	NA	0.4	Income and productivity gains from delivering vaccine (US$ / dose)	0.00597415	0.0419183	0.052372	0.0711241	0.0863619	0.0694041	0.081486	0.0879642	0.10522	0.128771	0.139565	0.128107	0.128708	0.134157	0.140224
44	PEV (Pre-Erythrocytic Vaccine)	3	0.35	4	0.1	Infants	6, 10, &, 14 weeks	None	0.498525	0.69	0.85	0.85	NA	NA	5-17mo	0 yrs	None	0.7	0.81	0.93	0.93	NA	NA	None	NA	NA	NA	NA	NA	NA	NA	NA	0.4	Cases per 100,000 population	8599.57	8573.45	8524.62	8485.2	8484.67	8474.05	8402.09	8346.19	8284.28	8269.72	8226.15	8210.26	8154.19	8151.87	8131.55
44	PEV (Pre-Erythrocytic Vaccine)	3	0.35	4	0.1	Infants	6, 10, &, 14 weeks	None	0.498525	0.69	0.85	0.85	NA	NA	5-17mo	0 yrs	None	0.7	0.81	0.93	0.93	NA	NA	None	NA	NA	NA	NA	NA	NA	NA	NA	0.4	Severe Cases per 100,000 population	151.736	146.318	146.082	146.345	146.4	145.082	144.155	143.982	143.027	141.636	140.282	141.527	141.227	142.509	140.518
44	PEV (Pre-Erythrocytic Vaccine)	3	0.35	4	0.1	Infants	6, 10, &, 14 weeks	None	0.498525	0.69	0.85	0.85	NA	NA	5-17mo	0 yrs	None	0.7	0.81	0.93	0.93	NA	NA	None	NA	NA	NA	NA	NA	NA	NA	NA	0.4	Deaths per 100,000 population	31.1	30.3455	30.6364	30.0727	29.8727	29.8091	29.8818	30.7091	29.8818	29.5364	29.5	28.9273	29.8091	29.6273	29.8455
44	PEV (Pre-Erythrocytic Vaccine)	3	0.35	4	0.1	Infants	6, 10, &, 14 weeks	None	0.498525	0.69	0.85	0.85	NA	NA	5-17mo	0 yrs	None	0.7	0.81	0.93	0.93	NA	NA	None	NA	NA	NA	NA	NA	NA	NA	NA	0.4	Cases in <5yo per 100,000 population	660.218	631.018	615.491	590.491	602.973	588.555	588.173	588.991	582.409	576.682	580.673	578.027	565.755	572.855	572.027
44	PEV (Pre-Erythrocytic Vaccine)	3	0.35	4	0.1	Infants	6, 10, &, 14 weeks	None	0.498525	0.69	0.85	0.85	NA	NA	5-17mo	0 yrs	None	0.7	0.81	0.93	0.93	NA	NA	None	NA	NA	NA	NA	NA	NA	NA	NA	0.4	Severe Cases in <5yo per 100,000 population	34.8273	32.0091	31.4	30.7	31.1636	31.6273	30.4273	30.5545	30.9182	30.1727	30.2909	30.1455	29.3273	29.4909	29.2
44	PEV (Pre-Erythrocytic Vaccine)	3	0.35	4	0.1	Infants	6, 10, &, 14 weeks	None	0.498525	0.69	0.85	0.85	NA	NA	5-17mo	0 yrs	None	0.7	0.81	0.93	0.93	NA	NA	None	NA	NA	NA	NA	NA	NA	NA	NA	0.4	Deaths in < 5yo per 100,000 population	8.67273	7.85455	7.97273	7.93636	7.94545	7.80909	7.39091	8	7.84545	7.63636	7.69091	7.67273	7.39091	7.95455	7.60909
44	PEV (Pre-Erythrocytic Vaccine)	3	0.35	4	0.1	Infants	6, 10, &, 14 weeks	None	0.498525	0.69	0.85	0.85	NA	NA	5-17mo	0 yrs	None	0.7	0.81	0.93	0.93	NA	NA	None	NA	NA	NA	NA	NA	NA	NA	NA	0.4	DALYs per 100,000 population	795.182	772.624	782.284	769.088	759.477	759.72	759.002	781.864	759.719	750.798	747.342	737.552	755.175	755.071	757.148
44	PEV (Pre-Erythrocytic Vaccine)	3	0.35	4	0.1	Infants	6, 10, &, 14 weeks	None	0.498525	0.69	0.85	0.85	NA	NA	5-17mo	0 yrs	None	0.7	0.81	0.93	0.93	NA	NA	None	NA	NA	NA	NA	NA	NA	NA	NA	0.4	Income and productivity gains from delivering vaccine (US$ / dose)	-0.00405772	0.00439184	0.0194168	0.0297781	0.033031	0.03442	0.0610788	0.0775261	0.0946714	0.0991583	0.11907	0.12177	0.142725	0.140748	0.148906
45	PEV (Pre-Erythrocytic Vaccine)	3	0.35	4	0.1	Infants	6, 10, &, 14 weeks	None	0.498525	0.69	0.85	0.85	NA	NA	5-17mo	0 yrs	None	0.5	0.69	0.85	0.85	NA	NA	None	NA	NA	NA	NA	NA	NA	NA	NA	0.4	Cases per 100,000 population	8592.69	8521.89	8507.44	8404.5	8308.92	8330.09	8257.54	8228.13	8220.37	8287.55	8310.4	8218.66	8222.29	8242.01	8120.39
45	PEV (Pre-Erythrocytic Vaccine)	3	0.35	4	0.1	Infants	6, 10, &, 14 weeks	None	0.498525	0.69	0.85	0.85	NA	NA	5-17mo	0 yrs	None	0.5	0.69	0.85	0.85	NA	NA	None	NA	NA	NA	NA	NA	NA	NA	NA	0.4	Severe Cases per 100,000 population	150.118	148.218	148.091	144.555	142.355	142.255	139.464	143.545	142.318	142.955	145.427	140.545	142.991	143.691	142.245
45	PEV (Pre-Erythrocytic Vaccine)	3	0.35	4	0.1	Infants	6, 10, &, 14 weeks	None	0.498525	0.69	0.85	0.85	NA	NA	5-17mo	0 yrs	None	0.5	0.69	0.85	0.85	NA	NA	None	NA	NA	NA	NA	NA	NA	NA	NA	0.4	Deaths per 100,000 population	30.4182	30.2364	30.6	30.3455	29.4091	28.8818	29.1545	29.6727	28.9	29.5455	31.0727	28.8364	29.6909	29.2636	30.2364
45	PEV (Pre-Erythrocytic Vaccine)	3	0.35	4	0.1	Infants	6, 10, &, 14 weeks	None	0.498525	0.69	0.85	0.85	NA	NA	5-17mo	0 yrs	None	0.5	0.69	0.85	0.85	NA	NA	None	NA	NA	NA	NA	NA	NA	NA	NA	0.4	Cases in <5yo per 100,000 population	667.2	630.409	608.745	586.455	584.073	574.764	574.945	577.036	575.473	584.509	585.473	572.027	581.173	578.464	568.6
45	PEV (Pre-Erythrocytic Vaccine)	3	0.35	4	0.1	Infants	6, 10, &, 14 weeks	None	0.498525	0.69	0.85	0.85	NA	NA	5-17mo	0 yrs	None	0.5	0.69	0.85	0.85	NA	NA	None	NA	NA	NA	NA	NA	NA	NA	NA	0.4	Severe Cases in <5yo per 100,000 population	34.4909	31.6636	31.2636	30.4091	30.4636	30.1909	28.7727	30.1091	30.1455	30.0364	30.2818	29.9909	30.1182	30.7727	30.1
45	PEV (Pre-Erythrocytic Vaccine)	3	0.35	4	0.1	Infants	6, 10, &, 14 weeks	None	0.498525	0.69	0.85	0.85	NA	NA	5-17mo	0 yrs	None	0.5	0.69	0.85	0.85	NA	NA	None	NA	NA	NA	NA	NA	NA	NA	NA	0.4	Deaths in < 5yo per 100,000 population	8.00909	7.55455	7.56364	7.74545	7.47273	7.4	7.54545	7.57273	7.58182	7.56364	7.84545	7.47273	7.45455	7.12727	7.88182
45	PEV (Pre-Erythrocytic Vaccine)	3	0.35	4	0.1	Infants	6, 10, &, 14 weeks	None	0.498525	0.69	0.85	0.85	NA	NA	5-17mo	0 yrs	None	0.5	0.69	0.85	0.85	NA	NA	None	NA	NA	NA	NA	NA	NA	NA	NA	0.4	DALYs per 100,000 population	776.671	771.9	776.995	772.181	745.61	737.597	740.933	751.723	737.426	751.184	787.908	735.618	753.469	746.044	768.596
45	PEV (Pre-Erythrocytic Vaccine)	3	0.35	4	0.1	Infants	6, 10, &, 14 weeks	None	0.498525	0.69	0.85	0.85	NA	NA	5-17mo	0 yrs	None	0.5	0.69	0.85	0.85	NA	NA	None	NA	NA	NA	NA	NA	NA	NA	NA	0.4	Income and productivity gains from delivering vaccine (US$ / dose)	-0.00262182	0.0211403	0.0208366	0.0570711	0.0940808	0.0835773	0.111739	0.114638	0.115658	0.0957697	0.086923	0.120269	0.120179	0.111316	0.151416
46	PEV (Pre-Erythrocytic Vaccine)	3	0.35	4	1	Infants	6, 10, &, 14 weeks	None	0.893855	0.95	0.97	0.97	NA	NA	5-17mo	0 yrs	None	0.89	0.95	0.97	0.97	NA	NA	None	NA	NA	NA	NA	NA	NA	NA	NA	0.4	Cases per 100,000 population	86092.7	85362.9	84836.8	83717.2	83277	82908.4	81985	81229.1	80483.5	79892.2	79592.8	79326.3	79245.8	79723.6	78893.8
46	PEV (Pre-Erythrocytic Vaccine)	3	0.35	4	1	Infants	6, 10, &, 14 weeks	None	0.893855	0.95	0.97	0.97	NA	NA	5-17mo	0 yrs	None	0.89	0.95	0.97	0.97	NA	NA	None	NA	NA	NA	NA	NA	NA	NA	NA	0.4	Severe Cases per 100,000 population	1494.91	1461.82	1441.91	1440.82	1421.45	1387.55	1390.82	1354.18	1382.36	1356.82	1363.91	1365.45	1347.64	1382.45	1391.27
46	PEV (Pre-Erythrocytic Vaccine)	3	0.35	4	1	Infants	6, 10, &, 14 weeks	None	0.893855	0.95	0.97	0.97	NA	NA	5-17mo	0 yrs	None	0.89	0.95	0.97	0.97	NA	NA	None	NA	NA	NA	NA	NA	NA	NA	NA	0.4	Deaths per 100,000 population	308.545	294	305.545	302.545	294.545	293	294.818	291.636	289.091	281.364	280.273	287.455	286	286	281.091
46	PEV (Pre-Erythrocytic Vaccine)	3	0.35	4	1	Infants	6, 10, &, 14 weeks	None	0.893855	0.95	0.97	0.97	NA	NA	5-17mo	0 yrs	None	0.89	0.95	0.97	0.97	NA	NA	None	NA	NA	NA	NA	NA	NA	NA	NA	0.4	Cases in <5yo per 100,000 population	6616.55	6105.45	5752.09	5376.27	5346	5222.91	5205.36	5180.27	5129.18	5065.36	5034.36	5010.55	5009.73	5090.55	5056.73
46	PEV (Pre-Erythrocytic Vaccine)	3	0.35	4	1	Infants	6, 10, &, 14 weeks	None	0.893855	0.95	0.97	0.97	NA	NA	5-17mo	0 yrs	None	0.89	0.95	0.97	0.97	NA	NA	None	NA	NA	NA	NA	NA	NA	NA	NA	0.4	Severe Cases in <5yo per 100,000 population	341.727	320.182	297.182	286.909	271.818	266	263.455	266	270.545	261.545	269.545	268.455	262.273	269	272.273
46	PEV (Pre-Erythrocytic Vaccine)	3	0.35	4	1	Infants	6, 10, &, 14 weeks	None	0.893855	0.95	0.97	0.97	NA	NA	5-17mo	0 yrs	None	0.89	0.95	0.97	0.97	NA	NA	None	NA	NA	NA	NA	NA	NA	NA	NA	0.4	Deaths in < 5yo per 100,000 population	80.3636	79.6364	74.7273	76.1818	73.0909	69.2727	74.3636	71.2727	73.3636	72.0909	71.4545	75.3636	71.7273	68.8182	71.4545
46	PEV (Pre-Erythrocytic Vaccine)	3	0.35	4	1	Infants	6, 10, &, 14 weeks	None	0.893855	0.95	0.97	0.97	NA	NA	5-17mo	0 yrs	None	0.89	0.95	0.97	0.97	NA	NA	None	NA	NA	NA	NA	NA	NA	NA	NA	0.4	DALYs per 100,000 population	7827.01	7512.93	7809.18	7723.55	7473.98	7449.02	7524.59	7416.29	7368.98	7156.3	7112.3	7303.41	7277.61	7260.82	7146.17
46	PEV (Pre-Erythrocytic Vaccine)	3	0.35	4	1	Infants	6, 10, &, 14 weeks	None	0.893855	0.95	0.97	0.97	NA	NA	5-17mo	0 yrs	None	0.89	0.95	0.97	0.97	NA	NA	None	NA	NA	NA	NA	NA	NA	NA	NA	0.4	Income and productivity gains from delivering vaccine (US$ / dose)	-0.026646	0.0752691	0.177941	0.396352	0.509684	0.588848	0.795834	0.965981	1.09784	1.23674	1.30904	1.35968	1.41627	1.28848	1.45393
47	PEV (Pre-Erythrocytic Vaccine)	3	0.35	4	1	Infants	6, 10, &, 14 weeks	None	0.893855	0.95	0.97	0.97	NA	NA	5-17mo	0 yrs	None	0.7	0.81	0.93	0.93	NA	NA	None	NA	NA	NA	NA	NA	NA	NA	NA	0.4	Cases per 100,000 population	85644.6	84705.5	84417.6	83943.3	83259.8	82515.7	81736.5	81778	80035.5	80638	80547.7	79582.2	78962.8	79372.9	78535.9
47	PEV (Pre-Erythrocytic Vaccine)	3	0.35	4	1	Infants	6, 10, &, 14 weeks	None	0.893855	0.95	0.97	0.97	NA	NA	5-17mo	0 yrs	None	0.7	0.81	0.93	0.93	NA	NA	None	NA	NA	NA	NA	NA	NA	NA	NA	0.4	Severe Cases per 100,000 population	1488.09	1458.36	1459.18	1419	1424.18	1401.18	1388.82	1375.55	1348.45	1374.36	1378.09	1361.09	1363.73	1381.82	1367.91
47	PEV (Pre-Erythrocytic Vaccine)	3	0.35	4	1	Infants	6, 10, &, 14 weeks	None	0.893855	0.95	0.97	0.97	NA	NA	5-17mo	0 yrs	None	0.7	0.81	0.93	0.93	NA	NA	None	NA	NA	NA	NA	NA	NA	NA	NA	0.4	Deaths per 100,000 population	304.545	308.364	307.364	295.455	292.182	288.273	290.273	282.182	284	289.273	289.727	279	297.909	284.273	291.273
47	PEV (Pre-Erythrocytic Vaccine)	3	0.35	4	1	Infants	6, 10, &, 14 weeks	None	0.893855	0.95	0.97	0.97	NA	NA	5-17mo	0 yrs	None	0.7	0.81	0.93	0.93	NA	NA	None	NA	NA	NA	NA	NA	NA	NA	NA	0.4	Cases in <5yo per 100,000 population	6652.45	6086.27	5719.73	5418.73	5363	5242.45	5202.64	5228.18	5059.91	5150	5131.73	5063.64	4971.82	5043.18	4939.91
47	PEV (Pre-Erythrocytic Vaccine)	3	0.35	4	1	Infants	6, 10, &, 14 weeks	None	0.893855	0.95	0.97	0.97	NA	NA	5-17mo	0 yrs	None	0.7	0.81	0.93	0.93	NA	NA	None	NA	NA	NA	NA	NA	NA	NA	NA	0.4	Severe Cases in <5yo per 100,000 population	344.818	309.818	290.636	278.545	282.364	272.818	282.182	270.091	261	272	275.091	268.091	270.909	269	257.364
47	PEV (Pre-Erythrocytic Vaccine)	3	0.35	4	1	Infants	6, 10, &, 14 weeks	None	0.893855	0.95	0.97	0.97	NA	NA	5-17mo	0 yrs	None	0.7	0.81	0.93	0.93	NA	NA	None	NA	NA	NA	NA	NA	NA	NA	NA	0.4	Deaths in < 5yo per 100,000 population	80.5455	75.5455	78.4545	72.3636	74.8182	71.4545	75.8182	70.8182	71.8182	69.2727	72.2727	69.2727	75.1818	73.3636	69.7273
47	PEV (Pre-Erythrocytic Vaccine)	3	0.35	4	1	Infants	6, 10, &, 14 weeks	None	0.893855	0.95	0.97	0.97	NA	NA	5-17mo	0 yrs	None	0.7	0.81	0.93	0.93	NA	NA	None	NA	NA	NA	NA	NA	NA	NA	NA	0.4	DALYs per 100,000 population	7758.49	7819.14	7813.46	7526.8	7455.58	7334.58	7394.64	7158.54	7204.77	7333.58	7349.75	7099.78	7528.91	7259.99	7361.37
47	PEV (Pre-Erythrocytic Vaccine)	3	0.35	4	1	Infants	6, 10, &, 14 weeks	None	0.893855	0.95	0.97	0.97	NA	NA	5-17mo	0 yrs	None	0.7	0.81	0.93	0.93	NA	NA	None	NA	NA	NA	NA	NA	NA	NA	NA	0.4	Income and productivity gains from delivering vaccine (US$ / dose)	0.0369081	0.234077	0.267624	0.353242	0.510761	0.678947	0.849575	0.832316	1.19385	1.06212	1.09787	1.31449	1.45899	1.33802	1.54338
48	PEV (Pre-Erythrocytic Vaccine)	3	0.35	4	1	Infants	6, 10, &, 14 weeks	None	0.893855	0.95	0.97	0.97	NA	NA	5-17mo	0 yrs	None	0.5	0.69	0.85	0.85	NA	NA	None	NA	NA	NA	NA	NA	NA	NA	NA	0.4	Cases per 100,000 population	85883	84751.5	84237.9	83819	83369.4	82729.5	81752.7	81508.5	81102.1	80766.3	80749.3	80323.4	79332.8	79498	78851.6
48	PEV (Pre-Erythrocytic Vaccine)	3	0.35	4	1	Infants	6, 10, &, 14 weeks	None	0.893855	0.95	0.97	0.97	NA	NA	5-17mo	0 yrs	None	0.5	0.69	0.85	0.85	NA	NA	None	NA	NA	NA	NA	NA	NA	NA	NA	0.4	Severe Cases per 100,000 population	1495.64	1473.45	1432.55	1422.82	1421.18	1401.09	1383.18	1374.82	1371	1370.73	1381.55	1401.27	1378	1376.91	1381.73
48	PEV (Pre-Erythrocytic Vaccine)	3	0.35	4	1	Infants	6, 10, &, 14 weeks	None	0.893855	0.95	0.97	0.97	NA	NA	5-17mo	0 yrs	None	0.5	0.69	0.85	0.85	NA	NA	None	NA	NA	NA	NA	NA	NA	NA	NA	0.4	Deaths per 100,000 population	310.818	299.818	298.727	295.182	290.636	299.091	282.091	280.545	290.455	291.545	290.818	285.455	288.455	296	287.727
48	PEV (Pre-Erythrocytic Vaccine)	3	0.35	4	1	Infants	6, 10, &, 14 weeks	None	0.893855	0.95	0.97	0.97	NA	NA	5-17mo	0 yrs	None	0.5	0.69	0.85	0.85	NA	NA	None	NA	NA	NA	NA	NA	NA	NA	NA	0.4	Cases in <5yo per 100,000 population	6651.45	6197.73	5768.36	5468.18	5317.36	5255.27	5184.36	5225.45	5171.45	5172	5130.45	5144.73	5014.09	5103.91	5029
48	PEV (Pre-Erythrocytic Vaccine)	3	0.35	4	1	Infants	6, 10, &, 14 weeks	None	0.893855	0.95	0.97	0.97	NA	NA	5-17mo	0 yrs	None	0.5	0.69	0.85	0.85	NA	NA	None	NA	NA	NA	NA	NA	NA	NA	NA	0.4	Severe Cases in <5yo per 100,000 population	346.273	318.909	295.545	280.909	279.818	265.364	276.455	268.273	271.545	269.273	262.364	263	261.818	257	266.818
48	PEV (Pre-Erythrocytic Vaccine)	3	0.35	4	1	Infants	6, 10, &, 14 weeks	None	0.893855	0.95	0.97	0.97	NA	NA	5-17mo	0 yrs	None	0.5	0.69	0.85	0.85	NA	NA	None	NA	NA	NA	NA	NA	NA	NA	NA	0.4	Deaths in < 5yo per 100,000 population	80.3636	79.0909	75.1818	66.5455	71.4545	71.7273	71.4545	67.5455	67.1818	71.0909	70	67.7273	69	72.4545	71.1818
48	PEV (Pre-Erythrocytic Vaccine)	3	0.35	4	1	Infants	6, 10, &, 14 weeks	None	0.893855	0.95	0.97	0.97	NA	NA	5-17mo	0 yrs	None	0.5	0.69	0.85	0.85	NA	NA	None	NA	NA	NA	NA	NA	NA	NA	NA	0.4	DALYs per 100,000 population	7886.41	7683.35	7629.78	7497.8	7376.4	7573.85	7209.09	7161.55	7344.33	7432.05	7373.21	7247.66	7335.4	7490.16	7308.68
48	PEV (Pre-Erythrocytic Vaccine)	3	0.35	4	1	Infants	6, 10, &, 14 weeks	None	0.893855	0.95	0.97	0.97	NA	NA	5-17mo	0 yrs	None	0.5	0.69	0.85	0.85	NA	NA	None	NA	NA	NA	NA	NA	NA	NA	NA	0.4	Income and productivity gains from delivering vaccine (US$ / dose)	-0.00517226	0.21876	0.325124	0.392796	0.485413	0.636844	0.844555	0.895984	0.972675	1.03804	1.04408	1.13411	1.37856	1.33898	1.46139
49	PEV (Pre-Erythrocytic Vaccine)	3	0.35	4	1	Infants	6, 10, &, 14 weeks	None	0.700569	0.81	0.93	0.93	NA	NA	5-17mo	0 yrs	None	0.89	0.95	0.97	0.97	NA	NA	None	NA	NA	NA	NA	NA	NA	NA	NA	0.4	Cases per 100,000 population	85945.8	84916.5	84542.2	83861.2	83474.7	83513.3	83113.5	82229.2	81410.1	80899.1	80653.2	80748.9	80773.4	80320.2	80163.5
49	PEV (Pre-Erythrocytic Vaccine)	3	0.35	4	1	Infants	6, 10, &, 14 weeks	None	0.700569	0.81	0.93	0.93	NA	NA	5-17mo	0 yrs	None	0.89	0.95	0.97	0.97	NA	NA	None	NA	NA	NA	NA	NA	NA	NA	NA	0.4	Severe Cases per 100,000 population	1501.27	1470.45	1452.64	1432.82	1406.55	1432	1422.64	1404.55	1410.09	1370.45	1381.09	1409.36	1381	1422.82	1392.45
49	PEV (Pre-Erythrocytic Vaccine)	3	0.35	4	1	Infants	6, 10, &, 14 weeks	None	0.700569	0.81	0.93	0.93	NA	NA	5-17mo	0 yrs	None	0.89	0.95	0.97	0.97	NA	NA	None	NA	NA	NA	NA	NA	NA	NA	NA	0.4	Deaths per 100,000 population	314	300.727	295.818	299	302.909	297.091	296.636	294	296.091	280.818	282.364	290.182	295.091	298.909	295.727
49	PEV (Pre-Erythrocytic Vaccine)	3	0.35	4	1	Infants	6, 10, &, 14 weeks	None	0.700569	0.81	0.93	0.93	NA	NA	5-17mo	0 yrs	None	0.89	0.95	0.97	0.97	NA	NA	None	NA	NA	NA	NA	NA	NA	NA	NA	0.4	Cases in <5yo per 100,000 population	6539.45	6080.18	5879.82	5648.91	5601.73	5573.27	5549.82	5543.73	5431	5351.18	5352.45	5365.64	5421.36	5354	5381
49	PEV (Pre-Erythrocytic Vaccine)	3	0.35	4	1	Infants	6, 10, &, 14 weeks	None	0.700569	0.81	0.93	0.93	NA	NA	5-17mo	0 yrs	None	0.89	0.95	0.97	0.97	NA	NA	None	NA	NA	NA	NA	NA	NA	NA	NA	0.4	Severe Cases in <5yo per 100,000 population	344.091	310	301.636	297.727	288.727	296.545	285	291.727	281.818	288.091	284	280.818	272	286.182	281.091
49	PEV (Pre-Erythrocytic Vaccine)	3	0.35	4	1	Infants	6, 10, &, 14 weeks	None	0.700569	0.81	0.93	0.93	NA	NA	5-17mo	0 yrs	None	0.89	0.95	0.97	0.97	NA	NA	None	NA	NA	NA	NA	NA	NA	NA	NA	0.4	Deaths in < 5yo per 100,000 population	84.1818	76.0909	75.5455	77.3636	76.5455	73.2727	72.9091	72.4545	72.8182	73.8182	72.7273	73.7273	69.4545	70.1818	75.2727
49	PEV (Pre-Erythrocytic Vaccine)	3	0.35	4	1	Infants	6, 10, &, 14 weeks	None	0.700569	0.81	0.93	0.93	NA	NA	5-17mo	0 yrs	None	0.89	0.95	0.97	0.97	NA	NA	None	NA	NA	NA	NA	NA	NA	NA	NA	0.4	DALYs per 100,000 population	7989.92	7645.66	7584.21	7606.52	7649.97	7532.18	7510.08	7471.4	7502.12	7130.34	7181.84	7319.18	7478.71	7545.28	7527.07
49	PEV (Pre-Erythrocytic Vaccine)	3	0.35	4	1	Infants	6, 10, &, 14 weeks	None	0.700569	0.81	0.93	0.93	NA	NA	5-17mo	0 yrs	None	0.89	0.95	0.97	0.97	NA	NA	None	NA	NA	NA	NA	NA	NA	NA	NA	0.4	Income and productivity gains from delivering vaccine (US$ / dose)	-0.0282441	0.222994	0.313345	0.493978	0.631213	0.561015	0.691846	0.902721	1.08495	1.25896	1.33499	1.29802	1.3262	1.39279	1.46682
50	PEV (Pre-Erythrocytic Vaccine)	3	0.35	4	1	Infants	6, 10, &, 14 weeks	None	0.700569	0.81	0.93	0.93	NA	NA	5-17mo	0 yrs	None	0.7	0.81	0.93	0.93	NA	NA	None	NA	NA	NA	NA	NA	NA	NA	NA	0.4	Cases per 100,000 population	85945	85257.7	84451.1	83448.9	82700.6	82767.2	83102.3	81299.9	81546.6	81234.8	80638	80387.3	80304.7	80589.8	80820.6
50	PEV (Pre-Erythrocytic Vaccine)	3	0.35	4	1	Infants	6, 10, &, 14 weeks	None	0.700569	0.81	0.93	0.93	NA	NA	5-17mo	0 yrs	None	0.7	0.81	0.93	0.93	NA	NA	None	NA	NA	NA	NA	NA	NA	NA	NA	0.4	Severe Cases per 100,000 population	1495.45	1478.82	1444.73	1445.55	1413.55	1417.45	1423.36	1372.09	1386.55	1411.91	1388.09	1386	1390	1402.91	1414.82
50	PEV (Pre-Erythrocytic Vaccine)	3	0.35	4	1	Infants	6, 10, &, 14 weeks	None	0.700569	0.81	0.93	0.93	NA	NA	5-17mo	0 yrs	None	0.7	0.81	0.93	0.93	NA	NA	None	NA	NA	NA	NA	NA	NA	NA	NA	0.4	Deaths per 100,000 population	318.364	305.273	297.273	294.364	295.182	298.909	298.636	289	297.364	292.545	289.636	293.364	289.364	284.909	300.182
50	PEV (Pre-Erythrocytic Vaccine)	3	0.35	4	1	Infants	6, 10, &, 14 weeks	None	0.700569	0.81	0.93	0.93	NA	NA	5-17mo	0 yrs	None	0.7	0.81	0.93	0.93	NA	NA	None	NA	NA	NA	NA	NA	NA	NA	NA	0.4	Cases in <5yo per 100,000 population	6603.82	6139.91	5895.55	5587.91	5594.45	5514.64	5590.55	5431.45	5479.64	5471.91	5354.73	5385.09	5363.82	5405.82	5369.64
50	PEV (Pre-Erythrocytic Vaccine)	3	0.35	4	1	Infants	6, 10, &, 14 weeks	None	0.700569	0.81	0.93	0.93	NA	NA	5-17mo	0 yrs	None	0.7	0.81	0.93	0.93	NA	NA	None	NA	NA	NA	NA	NA	NA	NA	NA	0.4	Severe Cases in <5yo per 100,000 population	333.364	316.091	304.545	299.818	287.545	281.545	290.091	277.091	284.909	294.818	281.909	281.182	284	283	284.273
50	PEV (Pre-Erythrocytic Vaccine)	3	0.35	4	1	Infants	6, 10, &, 14 weeks	None	0.700569	0.81	0.93	0.93	NA	NA	5-17mo	0 yrs	None	0.7	0.81	0.93	0.93	NA	NA	None	NA	NA	NA	NA	NA	NA	NA	NA	0.4	Deaths in < 5yo per 100,000 population	85.6364	74.8182	75.4545	76.5455	74.5455	75.3636	74.2727	80.5455	76.1818	74.9091	74.3636	73.2727	69.8182	69.5455	74.2727
50	PEV (Pre-Erythrocytic Vaccine)	3	0.35	4	1	Infants	6, 10, &, 14 weeks	None	0.700569	0.81	0.93	0.93	NA	NA	5-17mo	0 yrs	None	0.7	0.81	0.93	0.93	NA	NA	None	NA	NA	NA	NA	NA	NA	NA	NA	0.4	DALYs per 100,000 population	8103.87	7743.42	7569.77	7486.3	7517.91	7628.15	7562.33	7341.34	7589.98	7430.05	7363.98	7473.57	7327	7260.88	7640.06
50	PEV (Pre-Erythrocytic Vaccine)	3	0.35	4	1	Infants	6, 10, &, 14 weeks	None	0.700569	0.81	0.93	0.93	NA	NA	5-17mo	0 yrs	None	0.7	0.81	0.93	0.93	NA	NA	None	NA	NA	NA	NA	NA	NA	NA	NA	0.4	Income and productivity gains from delivering vaccine (US$ / dose)	-0.0156875	0.12635	0.335609	0.573263	0.828374	0.772841	0.699113	1.17989	1.09187	1.16002	1.33226	1.41329	1.42832	1.33486	1.27803
51	PEV (Pre-Erythrocytic Vaccine)	3	0.35	4	1	Infants	6, 10, &, 14 weeks	None	0.700569	0.81	0.93	0.93	NA	NA	5-17mo	0 yrs	None	0.5	0.69	0.85	0.85	NA	NA	None	NA	NA	NA	NA	NA	NA	NA	NA	0.4	Cases per 100,000 population	85654.7	85381.7	84987.9	84289.5	83490.7	82727.1	82119.4	81593.4	81040.8	80536.6	80375.7	80309.7	80619.4	80875.9	80756.2
51	PEV (Pre-Erythrocytic Vaccine)	3	0.35	4	1	Infants	6, 10, &, 14 weeks	None	0.700569	0.81	0.93	0.93	NA	NA	5-17mo	0 yrs	None	0.5	0.69	0.85	0.85	NA	NA	None	NA	NA	NA	NA	NA	NA	NA	NA	0.4	Severe Cases per 100,000 population	1501.55	1491.09	1442.73	1456.91	1426.36	1403.27	1384.91	1378.82	1392.91	1384.27	1375.27	1388.73	1384.91	1389.18	1404.18
51	PEV (Pre-Erythrocytic Vaccine)	3	0.35	4	1	Infants	6, 10, &, 14 weeks	None	0.700569	0.81	0.93	0.93	NA	NA	5-17mo	0 yrs	None	0.5	0.69	0.85	0.85	NA	NA	None	NA	NA	NA	NA	NA	NA	NA	NA	0.4	Deaths per 100,000 population	316.182	302.091	300.091	304.545	297.909	292	291.545	295.818	292.727	297.636	281.727	282.636	289.636	288.455	296
51	PEV (Pre-Erythrocytic Vaccine)	3	0.35	4	1	Infants	6, 10, &, 14 weeks	None	0.700569	0.81	0.93	0.93	NA	NA	5-17mo	0 yrs	None	0.5	0.69	0.85	0.85	NA	NA	None	NA	NA	NA	NA	NA	NA	NA	NA	0.4	Cases in <5yo per 100,000 population	6682.18	6284.64	5984.36	5667.55	5657.55	5500.27	5531.64	5465.36	5417	5400.36	5329.36	5399.73	5396.55	5380	5408.36
51	PEV (Pre-Erythrocytic Vaccine)	3	0.35	4	1	Infants	6, 10, &, 14 weeks	None	0.700569	0.81	0.93	0.93	NA	NA	5-17mo	0 yrs	None	0.5	0.69	0.85	0.85	NA	NA	None	NA	NA	NA	NA	NA	NA	NA	NA	0.4	Severe Cases in <5yo per 100,000 population	345.455	326.182	308.182	299.636	290.818	286.636	286.545	274.545	285.727	283.727	276.818	284.909	280.727	288.545	282.545
51	PEV (Pre-Erythrocytic Vaccine)	3	0.35	4	1	Infants	6, 10, &, 14 weeks	None	0.700569	0.81	0.93	0.93	NA	NA	5-17mo	0 yrs	None	0.5	0.69	0.85	0.85	NA	NA	None	NA	NA	NA	NA	NA	NA	NA	NA	0.4	Deaths in < 5yo per 100,000 population	85.2727	77.0909	80.7273	74.6364	77	73.6364	79.2727	73.9091	72.8182	75.5455	75.0909	73.8182	70.5455	73.0909	73.6364
51	PEV (Pre-Erythrocytic Vaccine)	3	0.35	4	1	Infants	6, 10, &, 14 weeks	None	0.700569	0.81	0.93	0.93	NA	NA	5-17mo	0 yrs	None	0.5	0.69	0.85	0.85	NA	NA	None	NA	NA	NA	NA	NA	NA	NA	NA	0.4	DALYs per 100,000 population	8040.94	7721.1	7677.14	7798.35	7549.42	7392.74	7401.57	7471.26	7407.65	7555.41	7206.98	7204.6	7344.95	7310.66	7513.09
51	PEV (Pre-Erythrocytic Vaccine)	3	0.35	4	1	Infants	6, 10, &, 14 weeks	None	0.700569	0.81	0.93	0.93	NA	NA	5-17mo	0 yrs	None	0.5	0.69	0.85	0.85	NA	NA	None	NA	NA	NA	NA	NA	NA	NA	NA	0.4	Income and productivity gains from delivering vaccine (US$ / dose)	0.0452459	0.105167	0.206592	0.342274	0.591139	0.793994	0.992395	1.08961	1.204	1.34325	1.39636	1.43483	1.35007	1.26794	1.29612
52	PEV (Pre-Erythrocytic Vaccine)	3	0.35	4	1	Infants	6, 10, &, 14 weeks	None	0.498525	0.69	0.85	0.85	NA	NA	5-17mo	0 yrs	None	0.89	0.95	0.97	0.97	NA	NA	None	NA	NA	NA	NA	NA	NA	NA	NA	0.4	Cases per 100,000 population	85468.5	84563	84151.1	83634.6	83348.6	83735.7	83304.8	83163.7	82517	81748.9	81566.2	81905.6	81924.6	81734.9	81581.1
52	PEV (Pre-Erythrocytic Vaccine)	3	0.35	4	1	Infants	6, 10, &, 14 weeks	None	0.498525	0.69	0.85	0.85	NA	NA	5-17mo	0 yrs	None	0.89	0.95	0.97	0.97	NA	NA	None	NA	NA	NA	NA	NA	NA	NA	NA	0.4	Severe Cases per 100,000 population	1499.09	1457.36	1472.18	1425.09	1426.55	1429.73	1444.55	1422.64	1413.55	1429.82	1401.36	1435.27	1428.73	1418.82	1426.27
52	PEV (Pre-Erythrocytic Vaccine)	3	0.35	4	1	Infants	6, 10, &, 14 weeks	None	0.498525	0.69	0.85	0.85	NA	NA	5-17mo	0 yrs	None	0.89	0.95	0.97	0.97	NA	NA	None	NA	NA	NA	NA	NA	NA	NA	NA	0.4	Deaths per 100,000 population	303.091	311.545	313.182	302.455	301.636	299.182	300	304.182	298	301.909	293.909	299.273	293.364	302.182	295
52	PEV (Pre-Erythrocytic Vaccine)	3	0.35	4	1	Infants	6, 10, &, 14 weeks	None	0.498525	0.69	0.85	0.85	NA	NA	5-17mo	0 yrs	None	0.89	0.95	0.97	0.97	NA	NA	None	NA	NA	NA	NA	NA	NA	NA	NA	0.4	Cases in <5yo per 100,000 population	6599.55	6175.27	5950.91	5733.18	5865.09	5796.27	5831.73	5852.73	5772.73	5680.73	5692.45	5776.09	5688.55	5679.64	5667.55
52	PEV (Pre-Erythrocytic Vaccine)	3	0.35	4	1	Infants	6, 10, &, 14 weeks	None	0.498525	0.69	0.85	0.85	NA	NA	5-17mo	0 yrs	None	0.89	0.95	0.97	0.97	NA	NA	None	NA	NA	NA	NA	NA	NA	NA	NA	0.4	Severe Cases in <5yo per 100,000 population	342.636	313.455	311.364	294.182	304.818	304.727	314.818	302.636	296.273	301.273	288.091	307.182	298.273	294.545	291.727
52	PEV (Pre-Erythrocytic Vaccine)	3	0.35	4	1	Infants	6, 10, &, 14 weeks	None	0.498525	0.69	0.85	0.85	NA	NA	5-17mo	0 yrs	None	0.89	0.95	0.97	0.97	NA	NA	None	NA	NA	NA	NA	NA	NA	NA	NA	0.4	Deaths in < 5yo per 100,000 population	77.4545	80.8182	78	76.8182	76.5455	76.3636	77.4545	74.7273	73.8182	78.9091	73	80.4545	74.5455	74.1818	76.3636
52	PEV (Pre-Erythrocytic Vaccine)	3	0.35	4	1	Infants	6, 10, &, 14 weeks	None	0.498525	0.69	0.85	0.85	NA	NA	5-17mo	0 yrs	None	0.89	0.95	0.97	0.97	NA	NA	None	NA	NA	NA	NA	NA	NA	NA	NA	0.4	DALYs per 100,000 population	7736.95	7895.08	7928.22	7651.64	7634.18	7599.83	7659.61	7704.89	7600.5	7628.59	7456.64	7624.97	7442.32	7640.67	7525.69
52	PEV (Pre-Erythrocytic Vaccine)	3	0.35	4	1	Infants	6, 10, &, 14 weeks	None	0.498525	0.69	0.85	0.85	NA	NA	5-17mo	0 yrs	None	0.89	0.95	0.97	0.97	NA	NA	None	NA	NA	NA	NA	NA	NA	NA	NA	0.4	Income and productivity gains from delivering vaccine (US$ / dose)	0.0597415	0.419183	0.52372	0.711241	0.863619	0.694041	0.81486	0.879642	1.0522	1.28771	1.39565	1.28107	1.28708	1.34157	1.40224
53	PEV (Pre-Erythrocytic Vaccine)	3	0.35	4	1	Infants	6, 10, &, 14 weeks	None	0.498525	0.69	0.85	0.85	NA	NA	5-17mo	0 yrs	None	0.7	0.81	0.93	0.93	NA	NA	None	NA	NA	NA	NA	NA	NA	NA	NA	0.4	Cases per 100,000 population	85995.7	85734.5	85246.2	84852	84846.7	84740.5	84020.9	83461.9	82842.8	82697.2	82261.5	82102.6	81541.9	81518.7	81315.5
53	PEV (Pre-Erythrocytic Vaccine)	3	0.35	4	1	Infants	6, 10, &, 14 weeks	None	0.498525	0.69	0.85	0.85	NA	NA	5-17mo	0 yrs	None	0.7	0.81	0.93	0.93	NA	NA	None	NA	NA	NA	NA	NA	NA	NA	NA	0.4	Severe Cases per 100,000 population	1517.36	1463.18	1460.82	1463.45	1464	1450.82	1441.55	1439.82	1430.27	1416.36	1402.82	1415.27	1412.27	1425.09	1405.18
53	PEV (Pre-Erythrocytic Vaccine)	3	0.35	4	1	Infants	6, 10, &, 14 weeks	None	0.498525	0.69	0.85	0.85	NA	NA	5-17mo	0 yrs	None	0.7	0.81	0.93	0.93	NA	NA	None	NA	NA	NA	NA	NA	NA	NA	NA	0.4	Deaths per 100,000 population	311	303.455	306.364	300.727	298.727	298.091	298.818	307.091	298.818	295.364	295	289.273	298.091	296.273	298.455
53	PEV (Pre-Erythrocytic Vaccine)	3	0.35	4	1	Infants	6, 10, &, 14 weeks	None	0.498525	0.69	0.85	0.85	NA	NA	5-17mo	0 yrs	None	0.7	0.81	0.93	0.93	NA	NA	None	NA	NA	NA	NA	NA	NA	NA	NA	0.4	Cases in <5yo per 100,000 population	6602.18	6310.18	6154.91	5904.91	6029.73	5885.55	5881.73	5889.91	5824.09	5766.82	5806.73	5780.27	5657.55	5728.55	5720.27
53	PEV (Pre-Erythrocytic Vaccine)	3	0.35	4	1	Infants	6, 10, &, 14 weeks	None	0.498525	0.69	0.85	0.85	NA	NA	5-17mo	0 yrs	None	0.7	0.81	0.93	0.93	NA	NA	None	NA	NA	NA	NA	NA	NA	NA	NA	0.4	Severe Cases in <5yo per 100,000 population	348.273	320.091	314	307	311.636	316.273	304.273	305.545	309.182	301.727	302.909	301.455	293.273	294.909	292
53	PEV (Pre-Erythrocytic Vaccine)	3	0.35	4	1	Infants	6, 10, &, 14 weeks	None	0.498525	0.69	0.85	0.85	NA	NA	5-17mo	0 yrs	None	0.7	0.81	0.93	0.93	NA	NA	None	NA	NA	NA	NA	NA	NA	NA	NA	0.4	Deaths in < 5yo per 100,000 population	86.7273	78.5455	79.7273	79.3636	79.4545	78.0909	73.9091	80	78.4545	76.3636	76.9091	76.7273	73.9091	79.5455	76.0909
53	PEV (Pre-Erythrocytic Vaccine)	3	0.35	4	1	Infants	6, 10, &, 14 weeks	None	0.498525	0.69	0.85	0.85	NA	NA	5-17mo	0 yrs	None	0.7	0.81	0.93	0.93	NA	NA	None	NA	NA	NA	NA	NA	NA	NA	NA	0.4	DALYs per 100,000 population	7951.82	7726.24	7822.84	7690.88	7594.77	7597.2	7590.02	7818.64	7597.19	7507.98	7473.42	7375.52	7551.75	7550.71	7571.48
53	PEV (Pre-Erythrocytic Vaccine)	3	0.35	4	1	Infants	6, 10, &, 14 weeks	None	0.498525	0.69	0.85	0.85	NA	NA	5-17mo	0 yrs	None	0.7	0.81	0.93	0.93	NA	NA	None	NA	NA	NA	NA	NA	NA	NA	NA	0.4	Income and productivity gains from delivering vaccine (US$ / dose)	-0.0405772	0.0439184	0.194168	0.297781	0.33031	0.3442	0.610788	0.775261	0.946714	0.991583	1.1907	1.2177	1.42725	1.40748	1.48906
54	PEV (Pre-Erythrocytic Vaccine)	3	0.35	4	1	Infants	6, 10, &, 14 weeks	None	0.498525	0.69	0.85	0.85	NA	NA	5-17mo	0 yrs	None	0.5	0.69	0.85	0.85	NA	NA	None	NA	NA	NA	NA	NA	NA	NA	NA	0.4	Cases per 100,000 population	85926.9	85218.9	85074.4	84045	83089.2	83300.9	82575.4	82281.3	82203.7	82875.5	83104	82186.6	82222.9	82420.1	81203.9
54	PEV (Pre-Erythrocytic Vaccine)	3	0.35	4	1	Infants	6, 10, &, 14 weeks	None	0.498525	0.69	0.85	0.85	NA	NA	5-17mo	0 yrs	None	0.5	0.69	0.85	0.85	NA	NA	None	NA	NA	NA	NA	NA	NA	NA	NA	0.4	Severe Cases per 100,000 population	1501.18	1482.18	1480.91	1445.55	1423.55	1422.55	1394.64	1435.45	1423.18	1429.55	1454.27	1405.45	1429.91	1436.91	1422.45
54	PEV (Pre-Erythrocytic Vaccine)	3	0.35	4	1	Infants	6, 10, &, 14 weeks	None	0.498525	0.69	0.85	0.85	NA	NA	5-17mo	0 yrs	None	0.5	0.69	0.85	0.85	NA	NA	None	NA	NA	NA	NA	NA	NA	NA	NA	0.4	Deaths per 100,000 population	304.182	302.364	306	303.455	294.091	288.818	291.545	296.727	289	295.455	310.727	288.364	296.909	292.636	302.364
54	PEV (Pre-Erythrocytic Vaccine)	3	0.35	4	1	Infants	6, 10, &, 14 weeks	None	0.498525	0.69	0.85	0.85	NA	NA	5-17mo	0 yrs	None	0.5	0.69	0.85	0.85	NA	NA	None	NA	NA	NA	NA	NA	NA	NA	NA	0.4	Cases in <5yo per 100,000 population	6672	6304.09	6087.45	5864.55	5840.73	5747.64	5749.45	5770.36	5754.73	5845.09	5854.73	5720.27	5811.73	5784.64	5686
54	PEV (Pre-Erythrocytic Vaccine)	3	0.35	4	1	Infants	6, 10, &, 14 weeks	None	0.498525	0.69	0.85	0.85	NA	NA	5-17mo	0 yrs	None	0.5	0.69	0.85	0.85	NA	NA	None	NA	NA	NA	NA	NA	NA	NA	NA	0.4	Severe Cases in <5yo per 100,000 population	344.909	316.636	312.636	304.091	304.636	301.909	287.727	301.091	301.455	300.364	302.818	299.909	301.182	307.727	301
54	PEV (Pre-Erythrocytic Vaccine)	3	0.35	4	1	Infants	6, 10, &, 14 weeks	None	0.498525	0.69	0.85	0.85	NA	NA	5-17mo	0 yrs	None	0.5	0.69	0.85	0.85	NA	NA	None	NA	NA	NA	NA	NA	NA	NA	NA	0.4	Deaths in < 5yo per 100,000 population	80.0909	75.5455	75.6364	77.4545	74.7273	74	75.4545	75.7273	75.8182	75.6364	78.4545	74.7273	74.5455	71.2727	78.8182
54	PEV (Pre-Erythrocytic Vaccine)	3	0.35	4	1	Infants	6, 10, &, 14 weeks	None	0.498525	0.69	0.85	0.85	NA	NA	5-17mo	0 yrs	None	0.5	0.69	0.85	0.85	NA	NA	None	NA	NA	NA	NA	NA	NA	NA	NA	0.4	DALYs per 100,000 population	7766.71	7719	7769.95	7721.81	7456.1	7375.97	7409.33	7517.23	7374.26	7511.84	7879.08	7356.18	7534.69	7460.44	7685.96
54	PEV (Pre-Erythrocytic Vaccine)	3	0.35	4	1	Infants	6, 10, &, 14 weeks	None	0.498525	0.69	0.85	0.85	NA	NA	5-17mo	0 yrs	None	0.5	0.69	0.85	0.85	NA	NA	None	NA	NA	NA	NA	NA	NA	NA	NA	0.4	Income and productivity gains from delivering vaccine (US$ / dose)	-0.0262182	0.211403	0.208366	0.570711	0.940808	0.835773	1.11739	1.14638	1.15658	0.957697	0.86923	1.20269	1.20179	1.11316	1.51416
55	PEV (Pre-Erythrocytic Vaccine)	3	0.35	4	10	Infants	6, 10, &, 14 weeks	None	0.893855	0.95	0.97	0.97	NA	NA	5-17mo	0 yrs	None	0.89	0.95	0.97	0.97	NA	NA	None	NA	NA	NA	NA	NA	NA	NA	NA	0.4	Cases per 100,000 population	138816	136527	135382	134574	133991	133866	133441	133534	133804	134212	134572	134518	135293	135687	135903
55	PEV (Pre-Erythrocytic Vaccine)	3	0.35	4	10	Infants	6, 10, &, 14 weeks	None	0.893855	0.95	0.97	0.97	NA	NA	5-17mo	0 yrs	None	0.89	0.95	0.97	0.97	NA	NA	None	NA	NA	NA	NA	NA	NA	NA	NA	0.4	Severe Cases per 100,000 population	1779.64	1700.73	1670.45	1679.09	1686.45	1724.27	1730.82	1770	1799.45	1784.45	1795.73	1784	1821	1822.64	1836.45
55	PEV (Pre-Erythrocytic Vaccine)	3	0.35	4	10	Infants	6, 10, &, 14 weeks	None	0.893855	0.95	0.97	0.97	NA	NA	5-17mo	0 yrs	None	0.89	0.95	0.97	0.97	NA	NA	None	NA	NA	NA	NA	NA	NA	NA	NA	0.4	Deaths per 100,000 population	367.909	333	337.636	332.182	325.727	329.364	335.727	346.545	336.727	337.636	348.091	348	354.818	344.636	351.727
55	PEV (Pre-Erythrocytic Vaccine)	3	0.35	4	10	Infants	6, 10, &, 14 weeks	None	0.893855	0.95	0.97	0.97	NA	NA	5-17mo	0 yrs	None	0.89	0.95	0.97	0.97	NA	NA	None	NA	NA	NA	NA	NA	NA	NA	NA	0.4	Cases in <5yo per 100,000 population	29162.1	27284.2	26252.2	25658.4	25484	25330	25302.8	25349.3	25405.7	25435.6	25512.6	25309.2	25438.2	25433	25452.8
55	PEV (Pre-Erythrocytic Vaccine)	3	0.35	4	10	Infants	6, 10, &, 14 weeks	None	0.893855	0.95	0.97	0.97	NA	NA	5-17mo	0 yrs	None	0.89	0.95	0.97	0.97	NA	NA	None	NA	NA	NA	NA	NA	NA	NA	NA	0.4	Severe Cases in <5yo per 100,000 population	1133.82	1074	1044.91	1055.55	1062.64	1079.27	1065	1081.27	1087.36	1066.36	1075.82	1053.09	1080.27	1082.64	1074.27
55	PEV (Pre-Erythrocytic Vaccine)	3	0.35	4	10	Infants	6, 10, &, 14 weeks	None	0.893855	0.95	0.97	0.97	NA	NA	5-17mo	0 yrs	None	0.89	0.95	0.97	0.97	NA	NA	None	NA	NA	NA	NA	NA	NA	NA	NA	0.4	Deaths in < 5yo per 100,000 population	234.909	209.727	209.182	203.909	204.455	205.364	206.727	212.636	205.182	205.636	204.091	204.182	210.455	200.455	207.273
55	PEV (Pre-Erythrocytic Vaccine)	3	0.35	4	10	Infants	6, 10, &, 14 weeks	None	0.893855	0.95	0.97	0.97	NA	NA	5-17mo	0 yrs	None	0.89	0.95	0.97	0.97	NA	NA	None	NA	NA	NA	NA	NA	NA	NA	NA	0.4	DALYs per 100,000 population	9945.1	9038.16	9161.96	8991.25	8826.84	8971.15	9098.08	9405.61	9155.72	9212.7	9485.45	9452.58	9595.29	9362.74	9551.05
55	PEV (Pre-Erythrocytic Vaccine)	3	0.35	4	10	Infants	6, 10, &, 14 weeks	None	0.893855	0.95	0.97	0.97	NA	NA	5-17mo	0 yrs	None	0.89	0.95	0.97	0.97	NA	NA	None	NA	NA	NA	NA	NA	NA	NA	NA	0.4	Income and productivity gains from delivering vaccine (US$ / dose)	0.147453	0.563175	0.72225	0.819916	0.927382	0.926785	1.0039	0.990974	0.90332	0.839305	0.747009	0.750214	0.580504	0.478853	0.394324
56	PEV (Pre-Erythrocytic Vaccine)	3	0.35	4	10	Infants	6, 10, &, 14 weeks	None	0.893855	0.95	0.97	0.97	NA	NA	5-17mo	0 yrs	None	0.7	0.81	0.93	0.93	NA	NA	None	NA	NA	NA	NA	NA	NA	NA	NA	0.4	Cases per 100,000 population	138889	136567	135625	134492	134578	133886	133601	133960	133706	133941	134350	134473	134488	135506	135982
56	PEV (Pre-Erythrocytic Vaccine)	3	0.35	4	10	Infants	6, 10, &, 14 weeks	None	0.893855	0.95	0.97	0.97	NA	NA	5-17mo	0 yrs	None	0.7	0.81	0.93	0.93	NA	NA	None	NA	NA	NA	NA	NA	NA	NA	NA	0.4	Severe Cases per 100,000 population	1765.27	1695.45	1686.64	1689.73	1682	1727.64	1743	1771.91	1759.91	1803.27	1789.55	1800.64	1816.73	1839.18	1841.55
56	PEV (Pre-Erythrocytic Vaccine)	3	0.35	4	10	Infants	6, 10, &, 14 weeks	None	0.893855	0.95	0.97	0.97	NA	NA	5-17mo	0 yrs	None	0.7	0.81	0.93	0.93	NA	NA	None	NA	NA	NA	NA	NA	NA	NA	NA	0.4	Deaths per 100,000 population	363.273	338.636	343.273	333.455	331	338.636	323.364	346.182	348.636	355.455	344.727	342.909	355.818	359	341.909
56	PEV (Pre-Erythrocytic Vaccine)	3	0.35	4	10	Infants	6, 10, &, 14 weeks	None	0.893855	0.95	0.97	0.97	NA	NA	5-17mo	0 yrs	None	0.7	0.81	0.93	0.93	NA	NA	None	NA	NA	NA	NA	NA	NA	NA	NA	0.4	Cases in <5yo per 100,000 population	29324.8	27433.3	26363.5	25701.7	25654.1	25431	25338.9	25430.9	25259.9	25354.7	25419.8	25296	25174	25387.9	25490.3
56	PEV (Pre-Erythrocytic Vaccine)	3	0.35	4	10	Infants	6, 10, &, 14 weeks	None	0.893855	0.95	0.97	0.97	NA	NA	5-17mo	0 yrs	None	0.7	0.81	0.93	0.93	NA	NA	None	NA	NA	NA	NA	NA	NA	NA	NA	0.4	Severe Cases in <5yo per 100,000 population	1122.18	1073.91	1054	1058.45	1057.64	1075.91	1069.64	1078.64	1061.18	1082.55	1073.27	1072.36	1067.82	1077.18	1088
56	PEV (Pre-Erythrocytic Vaccine)	3	0.35	4	10	Infants	6, 10, &, 14 weeks	None	0.893855	0.95	0.97	0.97	NA	NA	5-17mo	0 yrs	None	0.7	0.81	0.93	0.93	NA	NA	None	NA	NA	NA	NA	NA	NA	NA	NA	0.4	Deaths in < 5yo per 100,000 population	229	212.364	216.636	208.545	205.818	209.455	195.091	215.818	211	209.364	208.909	204.818	209.455	209.091	202
56	PEV (Pre-Erythrocytic Vaccine)	3	0.35	4	10	Infants	6, 10, &, 14 weeks	None	0.893855	0.95	0.97	0.97	NA	NA	5-17mo	0 yrs	None	0.7	0.81	0.93	0.93	NA	NA	None	NA	NA	NA	NA	NA	NA	NA	NA	0.4	DALYs per 100,000 population	9809.87	9195.36	9328.57	9051.03	8985.61	9207.72	8832.07	9405.08	9483.09	9654.1	9362.82	9349.61	9638.76	9730.86	9294.93
56	PEV (Pre-Erythrocytic Vaccine)	3	0.35	4	10	Infants	6, 10, &, 14 weeks	None	0.893855	0.95	0.97	0.97	NA	NA	5-17mo	0 yrs	None	0.7	0.81	0.93	0.93	NA	NA	None	NA	NA	NA	NA	NA	NA	NA	NA	0.4	Income and productivity gains from delivering vaccine (US$ / dose)	0.167375	0.580443	0.666167	0.839645	0.812408	0.923436	0.954236	0.88841	0.937501	0.873309	0.782193	0.737992	0.713193	0.500555	0.382565
57	PEV (Pre-Erythrocytic Vaccine)	3	0.35	4	10	Infants	6, 10, &, 14 weeks	None	0.893855	0.95	0.97	0.97	NA	NA	5-17mo	0 yrs	None	0.5	0.69	0.85	0.85	NA	NA	None	NA	NA	NA	NA	NA	NA	NA	NA	0.4	Cases per 100,000 population	138784	136922	135802	134858	134146	133909	133807	133708	133765	134052	134436	134518	135083	135317	135600
57	PEV (Pre-Erythrocytic Vaccine)	3	0.35	4	10	Infants	6, 10, &, 14 weeks	None	0.893855	0.95	0.97	0.97	NA	NA	5-17mo	0 yrs	None	0.5	0.69	0.85	0.85	NA	NA	None	NA	NA	NA	NA	NA	NA	NA	NA	0.4	Severe Cases per 100,000 population	1769.91	1703.27	1707.55	1699.45	1703	1723.18	1735.55	1762.45	1752.82	1801.09	1790.27	1784.64	1816.73	1848.55	1822.18
57	PEV (Pre-Erythrocytic Vaccine)	3	0.35	4	10	Infants	6, 10, &, 14 weeks	None	0.893855	0.95	0.97	0.97	NA	NA	5-17mo	0 yrs	None	0.5	0.69	0.85	0.85	NA	NA	None	NA	NA	NA	NA	NA	NA	NA	NA	0.4	Deaths per 100,000 population	356.909	328.273	340.909	341.182	330.818	322.636	336.182	334.818	346.182	344.182	355.364	337.636	351.818	350.455	353.818
57	PEV (Pre-Erythrocytic Vaccine)	3	0.35	4	10	Infants	6, 10, &, 14 weeks	None	0.893855	0.95	0.97	0.97	NA	NA	5-17mo	0 yrs	None	0.5	0.69	0.85	0.85	NA	NA	None	NA	NA	NA	NA	NA	NA	NA	NA	0.4	Cases in <5yo per 100,000 population	29344	27612.9	26518.5	25853.9	25659	25381	25330.7	25376.8	25337.9	25358.5	25345.6	25338.5	25429	25487.1	25502.8
57	PEV (Pre-Erythrocytic Vaccine)	3	0.35	4	10	Infants	6, 10, &, 14 weeks	None	0.893855	0.95	0.97	0.97	NA	NA	5-17mo	0 yrs	None	0.5	0.69	0.85	0.85	NA	NA	None	NA	NA	NA	NA	NA	NA	NA	NA	0.4	Severe Cases in <5yo per 100,000 population	1148.36	1076.82	1087.91	1063.55	1076.64	1068.55	1059.45	1082.36	1062.73	1082.64	1067.27	1057.91	1082.09	1085.73	1074.82
57	PEV (Pre-Erythrocytic Vaccine)	3	0.35	4	10	Infants	6, 10, &, 14 weeks	None	0.893855	0.95	0.97	0.97	NA	NA	5-17mo	0 yrs	None	0.5	0.69	0.85	0.85	NA	NA	None	NA	NA	NA	NA	NA	NA	NA	NA	0.4	Deaths in < 5yo per 100,000 population	231.273	202	212.091	216	205.727	199.455	204.636	205.273	206.727	208.909	213.182	196.364	213	203	212.273
57	PEV (Pre-Erythrocytic Vaccine)	3	0.35	4	10	Infants	6, 10, &, 14 weeks	None	0.893855	0.95	0.97	0.97	NA	NA	5-17mo	0 yrs	None	0.5	0.69	0.85	0.85	NA	NA	None	NA	NA	NA	NA	NA	NA	NA	NA	0.4	DALYs per 100,000 population	9696.2	8954.72	9258.97	9258.25	9001.74	8798.25	9137.36	9109.07	9385.79	9351.81	9624.88	9203.62	9530.8	9520.39	9603
57	PEV (Pre-Erythrocytic Vaccine)	3	0.35	4	10	Infants	6, 10, &, 14 weeks	None	0.893855	0.95	0.97	0.97	NA	NA	5-17mo	0 yrs	None	0.5	0.69	0.85	0.85	NA	NA	None	NA	NA	NA	NA	NA	NA	NA	NA	0.4	Income and productivity gains from delivering vaccine (US$ / dose)	0.188801	0.508964	0.631548	0.77539	0.914561	0.91529	0.921481	0.94712	0.92776	0.843183	0.742157	0.739513	0.595476	0.538346	0.484334
58	PEV (Pre-Erythrocytic Vaccine)	3	0.35	4	10	Infants	6, 10, &, 14 weeks	None	0.700569	0.81	0.93	0.93	NA	NA	5-17mo	0 yrs	None	0.89	0.95	0.97	0.97	NA	NA	None	NA	NA	NA	NA	NA	NA	NA	NA	0.4	Cases per 100,000 population	138979	136938	136406	135428	135048	134786	134810	134872	135115	135300	135618	135821	136090	136670	136692
58	PEV (Pre-Erythrocytic Vaccine)	3	0.35	4	10	Infants	6, 10, &, 14 weeks	None	0.700569	0.81	0.93	0.93	NA	NA	5-17mo	0 yrs	None	0.89	0.95	0.97	0.97	NA	NA	None	NA	NA	NA	NA	NA	NA	NA	NA	0.4	Severe Cases per 100,000 population	1790.45	1702.55	1709.91	1709.82	1734.82	1760.64	1763.64	1795.64	1789.18	1801.64	1833.09	1836.27	1834.36	1833.55	1852.36
58	PEV (Pre-Erythrocytic Vaccine)	3	0.35	4	10	Infants	6, 10, &, 14 weeks	None	0.700569	0.81	0.93	0.93	NA	NA	5-17mo	0 yrs	None	0.89	0.95	0.97	0.97	NA	NA	None	NA	NA	NA	NA	NA	NA	NA	NA	0.4	Deaths per 100,000 population	363.545	343.273	341.818	339.909	343.182	343	352.727	344.182	353.727	343.818	366.455	354.545	352.455	360.455	359.273
58	PEV (Pre-Erythrocytic Vaccine)	3	0.35	4	10	Infants	6, 10, &, 14 weeks	None	0.700569	0.81	0.93	0.93	NA	NA	5-17mo	0 yrs	None	0.89	0.95	0.97	0.97	NA	NA	None	NA	NA	NA	NA	NA	NA	NA	NA	0.4	Cases in <5yo per 100,000 population	29231.2	27649.2	26971.2	26531.9	26456.9	26288.6	26280.6	26305.8	26395.9	26384.4	26445.4	26382.2	26434.3	26557.6	26432.8
58	PEV (Pre-Erythrocytic Vaccine)	3	0.35	4	10	Infants	6, 10, &, 14 weeks	None	0.700569	0.81	0.93	0.93	NA	NA	5-17mo	0 yrs	None	0.89	0.95	0.97	0.97	NA	NA	None	NA	NA	NA	NA	NA	NA	NA	NA	0.4	Severe Cases in <5yo per 100,000 population	1157.27	1069.27	1087.18	1089.64	1101.73	1104.82	1099.55	1099.18	1097.55	1088.55	1108.45	1103.18	1108.73	1103.64	1102.64
58	PEV (Pre-Erythrocytic Vaccine)	3	0.35	4	10	Infants	6, 10, &, 14 weeks	None	0.700569	0.81	0.93	0.93	NA	NA	5-17mo	0 yrs	None	0.89	0.95	0.97	0.97	NA	NA	None	NA	NA	NA	NA	NA	NA	NA	NA	0.4	Deaths in < 5yo per 100,000 population	230.091	213.909	218.091	209.727	215.091	212.273	224.455	210.636	217.091	206.182	224.909	219.364	219	214.273	216.273
58	PEV (Pre-Erythrocytic Vaccine)	3	0.35	4	10	Infants	6, 10, &, 14 weeks	None	0.700569	0.81	0.93	0.93	NA	NA	5-17mo	0 yrs	None	0.89	0.95	0.97	0.97	NA	NA	None	NA	NA	NA	NA	NA	NA	NA	NA	0.4	DALYs per 100,000 population	9849.57	9333.3	9283.5	9200.32	9301.96	9282.28	9567.49	9331.03	9574.36	9348.05	9960.61	9644.67	9579.06	9806.88	9735.3
58	PEV (Pre-Erythrocytic Vaccine)	3	0.35	4	10	Infants	6, 10, &, 14 weeks	None	0.700569	0.81	0.93	0.93	NA	NA	5-17mo	0 yrs	None	0.89	0.95	0.97	0.97	NA	NA	None	NA	NA	NA	NA	NA	NA	NA	NA	0.4	Income and productivity gains from delivering vaccine (US$ / dose)	0.149812	0.62783	0.665671	0.876918	0.945126	0.985388	0.958781	0.933435	0.900298	0.812272	0.732136	0.661116	0.596701	0.452487	0.404159
59	PEV (Pre-Erythrocytic Vaccine)	3	0.35	4	10	Infants	6, 10, &, 14 weeks	None	0.700569	0.81	0.93	0.93	NA	NA	5-17mo	0 yrs	None	0.7	0.81	0.93	0.93	NA	NA	None	NA	NA	NA	NA	NA	NA	NA	NA	0.4	Cases per 100,000 population	138848	137040	136366	135631	135313	134881	134846	134857	135057	135402	135610	135662	136130	136652	136605
59	PEV (Pre-Erythrocytic Vaccine)	3	0.35	4	10	Infants	6, 10, &, 14 weeks	None	0.700569	0.81	0.93	0.93	NA	NA	5-17mo	0 yrs	None	0.7	0.81	0.93	0.93	NA	NA	None	NA	NA	NA	NA	NA	NA	NA	NA	0.4	Severe Cases per 100,000 population	1766.73	1740.55	1714.09	1734.64	1722	1739.09	1779.18	1762.82	1807.18	1817.73	1789.73	1822.18	1836.91	1863.27	1840.82
59	PEV (Pre-Erythrocytic Vaccine)	3	0.35	4	10	Infants	6, 10, &, 14 weeks	None	0.700569	0.81	0.93	0.93	NA	NA	5-17mo	0 yrs	None	0.7	0.81	0.93	0.93	NA	NA	None	NA	NA	NA	NA	NA	NA	NA	NA	0.4	Deaths per 100,000 population	352.273	342.818	346.727	339	340.818	343.273	352.455	339.818	350.636	353.727	353.818	355.364	368.909	363.455	360.091
59	PEV (Pre-Erythrocytic Vaccine)	3	0.35	4	10	Infants	6, 10, &, 14 weeks	None	0.700569	0.81	0.93	0.93	NA	NA	5-17mo	0 yrs	None	0.7	0.81	0.93	0.93	NA	NA	None	NA	NA	NA	NA	NA	NA	NA	NA	0.4	Cases in <5yo per 100,000 population	29307.1	27756	26991.4	26512	26458.9	26342.3	26360.7	26355.5	26413.9	26424.7	26442.7	26318.2	26440.5	26498.4	26414.6
59	PEV (Pre-Erythrocytic Vaccine)	3	0.35	4	10	Infants	6, 10, &, 14 weeks	None	0.700569	0.81	0.93	0.93	NA	NA	5-17mo	0 yrs	None	0.7	0.81	0.93	0.93	NA	NA	None	NA	NA	NA	NA	NA	NA	NA	NA	0.4	Severe Cases in <5yo per 100,000 population	1147.82	1101.82	1084.73	1102.27	1084.18	1092.91	1104.18	1089.36	1118.09	1115	1084.73	1093	1114	1118.91	1096.73
59	PEV (Pre-Erythrocytic Vaccine)	3	0.35	4	10	Infants	6, 10, &, 14 weeks	None	0.700569	0.81	0.93	0.93	NA	NA	5-17mo	0 yrs	None	0.7	0.81	0.93	0.93	NA	NA	None	NA	NA	NA	NA	NA	NA	NA	NA	0.4	Deaths in < 5yo per 100,000 population	229.273	218.182	219.182	217.818	209.182	209.545	218	213.182	217.909	218.182	213.182	215.273	222.636	219.182	216.818
59	PEV (Pre-Erythrocytic Vaccine)	3	0.35	4	10	Infants	6, 10, &, 14 weeks	None	0.700569	0.81	0.93	0.93	NA	NA	5-17mo	0 yrs	None	0.7	0.81	0.93	0.93	NA	NA	None	NA	NA	NA	NA	NA	NA	NA	NA	0.4	DALYs per 100,000 population	9560.98	9304.91	9417.86	9225.86	9215.64	9341.11	9572.35	9237.76	9535.14	9619.06	9591.55	9664.29	9969.35	9828.84	9780.12
59	PEV (Pre-Erythrocytic Vaccine)	3	0.35	4	10	Infants	6, 10, &, 14 weeks	None	0.700569	0.81	0.93	0.93	NA	NA	5-17mo	0 yrs	None	0.7	0.81	0.93	0.93	NA	NA	None	NA	NA	NA	NA	NA	NA	NA	NA	0.4	Income and productivity gains from delivering vaccine (US$ / dose)	0.186588	0.585025	0.690301	0.771611	0.87896	0.994871	0.963505	0.981338	0.901671	0.782888	0.770336	0.700025	0.589974	0.424723	0.435889
60	PEV (Pre-Erythrocytic Vaccine)	3	0.35	4	10	Infants	6, 10, &, 14 weeks	None	0.700569	0.81	0.93	0.93	NA	NA	5-17mo	0 yrs	None	0.5	0.69	0.85	0.85	NA	NA	None	NA	NA	NA	NA	NA	NA	NA	NA	0.4	Cases per 100,000 population	138777	137327	136116	135636	135410	135131	134820	134894	135201	135395	135448	135609	136305	136410	136820
60	PEV (Pre-Erythrocytic Vaccine)	3	0.35	4	10	Infants	6, 10, &, 14 weeks	None	0.700569	0.81	0.93	0.93	NA	NA	5-17mo	0 yrs	None	0.5	0.69	0.85	0.85	NA	NA	None	NA	NA	NA	NA	NA	NA	NA	NA	0.4	Severe Cases per 100,000 population	1820.64	1730.73	1733.09	1719.27	1696.45	1739.91	1777.82	1780.18	1776.45	1814	1807.45	1811.73	1850.82	1815.91	1827
60	PEV (Pre-Erythrocytic Vaccine)	3	0.35	4	10	Infants	6, 10, &, 14 weeks	None	0.700569	0.81	0.93	0.93	NA	NA	5-17mo	0 yrs	None	0.5	0.69	0.85	0.85	NA	NA	None	NA	NA	NA	NA	NA	NA	NA	NA	0.4	Deaths per 100,000 population	367	344.455	344.091	344.455	331.364	340	345	344.182	342.273	351.636	359.455	350.636	348.727	358	353.818
60	PEV (Pre-Erythrocytic Vaccine)	3	0.35	4	10	Infants	6, 10, &, 14 weeks	None	0.700569	0.81	0.93	0.93	NA	NA	5-17mo	0 yrs	None	0.5	0.69	0.85	0.85	NA	NA	None	NA	NA	NA	NA	NA	NA	NA	NA	0.4	Cases in <5yo per 100,000 population	29396.8	27919.8	27125.8	26594.2	26565.3	26373.7	26342.5	26335.2	26376.8	26490.5	26400.9	26385.6	26518.4	26444.7	26465.1
60	PEV (Pre-Erythrocytic Vaccine)	3	0.35	4	10	Infants	6, 10, &, 14 weeks	None	0.700569	0.81	0.93	0.93	NA	NA	5-17mo	0 yrs	None	0.5	0.69	0.85	0.85	NA	NA	None	NA	NA	NA	NA	NA	NA	NA	NA	0.4	Severe Cases in <5yo per 100,000 population	1174.82	1097.36	1098.91	1102	1076.18	1102	1114.73	1089	1095.45	1093.45	1100	1104.09	1108.27	1077.36	1098
60	PEV (Pre-Erythrocytic Vaccine)	3	0.35	4	10	Infants	6, 10, &, 14 weeks	None	0.700569	0.81	0.93	0.93	NA	NA	5-17mo	0 yrs	None	0.5	0.69	0.85	0.85	NA	NA	None	NA	NA	NA	NA	NA	NA	NA	NA	0.4	Deaths in < 5yo per 100,000 population	232.182	213.091	217.091	218.545	208.909	207.091	218.364	212.545	211.091	214.273	219.818	212.818	211.182	207.182	214.909
60	PEV (Pre-Erythrocytic Vaccine)	3	0.35	4	10	Infants	6, 10, &, 14 weeks	None	0.700569	0.81	0.93	0.93	NA	NA	5-17mo	0 yrs	None	0.5	0.69	0.85	0.85	NA	NA	None	NA	NA	NA	NA	NA	NA	NA	NA	0.4	DALYs per 100,000 population	9954.33	9308.17	9339.24	9346.44	8993.06	9244.88	9369.99	9355.34	9301.81	9534.56	9695.58	9511.04	9475.85	9697.78	9567.15
60	PEV (Pre-Erythrocytic Vaccine)	3	0.35	4	10	Infants	6, 10, &, 14 weeks	None	0.700569	0.81	0.93	0.93	NA	NA	5-17mo	0 yrs	None	0.5	0.69	0.85	0.85	NA	NA	None	NA	NA	NA	NA	NA	NA	NA	NA	0.4	Income and productivity gains from delivering vaccine (US$ / dose)	0.18975	0.555924	0.758067	0.818056	0.89155	0.926946	0.970221	0.952137	0.880412	0.799208	0.79293	0.746827	0.531637	0.517804	0.396595
61	PEV (Pre-Erythrocytic Vaccine)	3	0.35	4	10	Infants	6, 10, &, 14 weeks	None	0.498525	0.69	0.85	0.85	NA	NA	5-17mo	0 yrs	None	0.89	0.95	0.97	0.97	NA	NA	None	NA	NA	NA	NA	NA	NA	NA	NA	0.4	Cases per 100,000 population	138932	137424	136634	136532	136409	135819	135964	136132	135914	136565	136764	136833	137391	137427	137522
61	PEV (Pre-Erythrocytic Vaccine)	3	0.35	4	10	Infants	6, 10, &, 14 weeks	None	0.498525	0.69	0.85	0.85	NA	NA	5-17mo	0 yrs	None	0.89	0.95	0.97	0.97	NA	NA	None	NA	NA	NA	NA	NA	NA	NA	NA	0.4	Severe Cases per 100,000 population	1764.45	1728	1727.64	1766	1770.18	1762.27	1791.27	1783.55	1813	1830.73	1843.27	1830.55	1834.91	1850	1850.27
61	PEV (Pre-Erythrocytic Vaccine)	3	0.35	4	10	Infants	6, 10, &, 14 weeks	None	0.498525	0.69	0.85	0.85	NA	NA	5-17mo	0 yrs	None	0.89	0.95	0.97	0.97	NA	NA	None	NA	NA	NA	NA	NA	NA	NA	NA	0.4	Deaths per 100,000 population	354.364	353	335.182	337.364	351.727	340.727	366.818	354.182	356.091	365.273	360.091	351.545	360.273	360.182	364.636
61	PEV (Pre-Erythrocytic Vaccine)	3	0.35	4	10	Infants	6, 10, &, 14 weeks	None	0.498525	0.69	0.85	0.85	NA	NA	5-17mo	0 yrs	None	0.89	0.95	0.97	0.97	NA	NA	None	NA	NA	NA	NA	NA	NA	NA	NA	0.4	Cases in <5yo per 100,000 population	29280.7	28002.3	27485.3	27232.5	27459.9	27255.9	27297.9	27295.7	27349.8	27340.7	27374.8	27352.2	27484.4	27387.5	27322.3
61	PEV (Pre-Erythrocytic Vaccine)	3	0.35	4	10	Infants	6, 10, &, 14 weeks	None	0.498525	0.69	0.85	0.85	NA	NA	5-17mo	0 yrs	None	0.89	0.95	0.97	0.97	NA	NA	None	NA	NA	NA	NA	NA	NA	NA	NA	0.4	Severe Cases in <5yo per 100,000 population	1140.36	1103.45	1094.27	1139.18	1136.27	1102.55	1120	1123.27	1132.73	1136.55	1149.45	1136	1132.73	1137.09	1131.18
61	PEV (Pre-Erythrocytic Vaccine)	3	0.35	4	10	Infants	6, 10, &, 14 weeks	None	0.498525	0.69	0.85	0.85	NA	NA	5-17mo	0 yrs	None	0.89	0.95	0.97	0.97	NA	NA	None	NA	NA	NA	NA	NA	NA	NA	NA	0.4	Deaths in < 5yo per 100,000 population	229.455	221.909	212	211.818	220.636	210.455	231	218.091	222	223.364	226	221.364	219.182	217.727	223.818
61	PEV (Pre-Erythrocytic Vaccine)	3	0.35	4	10	Infants	6, 10, &, 14 weeks	None	0.498525	0.69	0.85	0.85	NA	NA	5-17mo	0 yrs	None	0.89	0.95	0.97	0.97	NA	NA	None	NA	NA	NA	NA	NA	NA	NA	NA	0.4	DALYs per 100,000 population	9599.79	9582.31	9120.14	9169.41	9546.09	9253.89	9941.4	9579.88	9652.6	9905.41	9769.07	9567.41	9784.23	9810.28	9870.34
61	PEV (Pre-Erythrocytic Vaccine)	3	0.35	4	10	Infants	6, 10, &, 14 weeks	None	0.498525	0.69	0.85	0.85	NA	NA	5-17mo	0 yrs	None	0.89	0.95	0.97	0.97	NA	NA	None	NA	NA	NA	NA	NA	NA	NA	NA	0.4	Income and productivity gains from delivering vaccine (US$ / dose)	0.184333	0.668793	0.848694	0.799316	0.868257	1.04676	0.974685	0.946335	0.983949	0.755178	0.675983	0.662025	0.482061	0.441144	0.396755
62	PEV (Pre-Erythrocytic Vaccine)	3	0.35	4	10	Infants	6, 10, &, 14 weeks	None	0.498525	0.69	0.85	0.85	NA	NA	5-17mo	0 yrs	None	0.7	0.81	0.93	0.93	NA	NA	None	NA	NA	NA	NA	NA	NA	NA	NA	0.4	Cases per 100,000 population	138954	137369	136882	136640	136226	136248	135937	136085	136299	136683	136741	136762	137337	137394	137774
62	PEV (Pre-Erythrocytic Vaccine)	3	0.35	4	10	Infants	6, 10, &, 14 weeks	None	0.498525	0.69	0.85	0.85	NA	NA	5-17mo	0 yrs	None	0.7	0.81	0.93	0.93	NA	NA	None	NA	NA	NA	NA	NA	NA	NA	NA	0.4	Severe Cases per 100,000 population	1776.09	1754.36	1747.73	1767.09	1780.09	1781.36	1782.91	1785.18	1819.27	1822.55	1817.45	1830.27	1829.36	1815.55	1866.36
62	PEV (Pre-Erythrocytic Vaccine)	3	0.35	4	10	Infants	6, 10, &, 14 weeks	None	0.498525	0.69	0.85	0.85	NA	NA	5-17mo	0 yrs	None	0.7	0.81	0.93	0.93	NA	NA	None	NA	NA	NA	NA	NA	NA	NA	NA	0.4	Deaths per 100,000 population	364	356.455	348.091	360.091	341.636	342.091	349.273	346.091	349.364	358.364	345.818	362.545	358	362.727	381.091
62	PEV (Pre-Erythrocytic Vaccine)	3	0.35	4	10	Infants	6, 10, &, 14 weeks	None	0.498525	0.69	0.85	0.85	NA	NA	5-17mo	0 yrs	None	0.7	0.81	0.93	0.93	NA	NA	None	NA	NA	NA	NA	NA	NA	NA	NA	0.4	Cases in <5yo per 100,000 population	29339.3	28081.8	27675.8	27319.7	27396.6	27462.8	27269.8	27366.8	27323	27447.3	27423.3	27317.8	27458.5	27375	27246.8
62	PEV (Pre-Erythrocytic Vaccine)	3	0.35	4	10	Infants	6, 10, &, 14 weeks	None	0.498525	0.69	0.85	0.85	NA	NA	5-17mo	0 yrs	None	0.7	0.81	0.93	0.93	NA	NA	None	NA	NA	NA	NA	NA	NA	NA	NA	0.4	Severe Cases in <5yo per 100,000 population	1136.55	1125.09	1117.73	1131.73	1138.18	1127.18	1129.18	1120.91	1130.64	1122.09	1137.55	1117.09	1126.64	1127.36	1135.73
62	PEV (Pre-Erythrocytic Vaccine)	3	0.35	4	10	Infants	6, 10, &, 14 weeks	None	0.498525	0.69	0.85	0.85	NA	NA	5-17mo	0 yrs	None	0.7	0.81	0.93	0.93	NA	NA	None	NA	NA	NA	NA	NA	NA	NA	NA	0.4	Deaths in < 5yo per 100,000 population	233.273	225	223.364	225.364	219.273	218.545	222.455	221.273	218.636	218	215.455	222.273	221	222.545	231
62	PEV (Pre-Erythrocytic Vaccine)	3	0.35	4	10	Infants	6, 10, &, 14 weeks	None	0.498525	0.69	0.85	0.85	NA	NA	5-17mo	0 yrs	None	0.7	0.81	0.93	0.93	NA	NA	None	NA	NA	NA	NA	NA	NA	NA	NA	0.4	DALYs per 100,000 population	9897.97	9670.66	9446.5	9721.93	9295.98	9325	9479.22	9426.82	9509.34	9714.15	9401.58	9831.33	9683.19	9829.32	10313
62	PEV (Pre-Erythrocytic Vaccine)	3	0.35	4	10	Infants	6, 10, &, 14 weeks	None	0.498525	0.69	0.85	0.85	NA	NA	5-17mo	0 yrs	None	0.7	0.81	0.93	0.93	NA	NA	None	NA	NA	NA	NA	NA	NA	NA	NA	0.4	Income and productivity gains from delivering vaccine (US$ / dose)	0.191894	0.692962	0.77189	0.771921	0.895246	0.931262	0.967177	0.961166	0.831956	0.734626	0.701715	0.697154	0.511847	0.488696	0.251447
63	PEV (Pre-Erythrocytic Vaccine)	3	0.35	4	10	Infants	6, 10, &, 14 weeks	None	0.498525	0.69	0.85	0.85	NA	NA	5-17mo	0 yrs	None	0.5	0.69	0.85	0.85	NA	NA	None	NA	NA	NA	NA	NA	NA	NA	NA	0.4	Cases per 100,000 population	139079	137628	137035	136543	136235	136110	136018	135891	136459	136646	136778	136792	137306	137368	137792
63	PEV (Pre-Erythrocytic Vaccine)	3	0.35	4	10	Infants	6, 10, &, 14 weeks	None	0.498525	0.69	0.85	0.85	NA	NA	5-17mo	0 yrs	None	0.5	0.69	0.85	0.85	NA	NA	None	NA	NA	NA	NA	NA	NA	NA	NA	0.4	Severe Cases per 100,000 population	1786.55	1767.45	1733.45	1736	1771.82	1763.55	1801.36	1798.27	1807.82	1808.82	1821.82	1830.36	1855.64	1862.91	1856.64
63	PEV (Pre-Erythrocytic Vaccine)	3	0.35	4	10	Infants	6, 10, &, 14 weeks	None	0.498525	0.69	0.85	0.85	NA	NA	5-17mo	0 yrs	None	0.5	0.69	0.85	0.85	NA	NA	None	NA	NA	NA	NA	NA	NA	NA	NA	0.4	Deaths per 100,000 population	358.727	345.818	345.818	347.636	345.182	338.545	352.636	344.455	365.727	355.273	357.818	363.636	365.636	363	355.909
63	PEV (Pre-Erythrocytic Vaccine)	3	0.35	4	10	Infants	6, 10, &, 14 weeks	None	0.498525	0.69	0.85	0.85	NA	NA	5-17mo	0 yrs	None	0.5	0.69	0.85	0.85	NA	NA	None	NA	NA	NA	NA	NA	NA	NA	NA	0.4	Cases in <5yo per 100,000 population	29521.3	28318.9	27808	27393.2	27309.7	27337.5	27372.1	27325.7	27419.4	27432.6	27442.8	27349.3	27397	27408.4	27470.9
63	PEV (Pre-Erythrocytic Vaccine)	3	0.35	4	10	Infants	6, 10, &, 14 weeks	None	0.498525	0.69	0.85	0.85	NA	NA	5-17mo	0 yrs	None	0.5	0.69	0.85	0.85	NA	NA	None	NA	NA	NA	NA	NA	NA	NA	NA	0.4	Severe Cases in <5yo per 100,000 population	1154.27	1124.36	1111.36	1129.73	1123.55	1119.36	1142	1132.45	1125.82	1121	1127.64	1141.09	1143.18	1137.27	1135.09
63	PEV (Pre-Erythrocytic Vaccine)	3	0.35	4	10	Infants	6, 10, &, 14 weeks	None	0.498525	0.69	0.85	0.85	NA	NA	5-17mo	0 yrs	None	0.5	0.69	0.85	0.85	NA	NA	None	NA	NA	NA	NA	NA	NA	NA	NA	0.4	Deaths in < 5yo per 100,000 population	231.091	221.909	220.273	223.273	217.364	212.273	220.545	217.545	230.727	218	224.364	225	226.636	225.091	220.909
63	PEV (Pre-Erythrocytic Vaccine)	3	0.35	4	10	Infants	6, 10, &, 14 weeks	None	0.498525	0.69	0.85	0.85	NA	NA	5-17mo	0 yrs	None	0.5	0.69	0.85	0.85	NA	NA	None	NA	NA	NA	NA	NA	NA	NA	NA	0.4	DALYs per 100,000 population	9733.49	9383.46	9378.41	9401.81	9365.26	9216.52	9572.19	9401.48	9906.74	9707.92	9712.44	9819.8	9923.15	9848.43	9657.07
63	PEV (Pre-Erythrocytic Vaccine)	3	0.35	4	10	Infants	6, 10, &, 14 weeks	None	0.498525	0.69	0.85	0.85	NA	NA	5-17mo	0 yrs	None	0.5	0.69	0.85	0.85	NA	NA	None	NA	NA	NA	NA	NA	NA	NA	NA	0.4	Income and productivity gains from delivering vaccine (US$ / dose)	0.181885	0.622574	0.753639	0.845958	0.909795	0.96781	0.965268	1.0033	0.805646	0.750818	0.688008	0.684694	0.485136	0.472233	0.306472
64	PEV (Pre-Erythrocytic Vaccine)	3	0.35	4	100	Infants	6, 10, &, 14 weeks	None	0.893855	0.95	0.97	0.97	NA	NA	5-17mo	0 yrs	None	0.89	0.95	0.97	0.97	NA	NA	None	NA	NA	NA	NA	NA	NA	NA	NA	0.4	Cases per 100,000 population	109259	108097	108261	108751	109746	110848	112033	113012	113922	114650	115335	115765	116191	116432	116723
64	PEV (Pre-Erythrocytic Vaccine)	3	0.35	4	100	Infants	6, 10, &, 14 weeks	None	0.893855	0.95	0.97	0.97	NA	NA	5-17mo	0 yrs	None	0.89	0.95	0.97	0.97	NA	NA	None	NA	NA	NA	NA	NA	NA	NA	NA	0.4	Severe Cases per 100,000 population	1415.06	1455.89	1521.28	1571.33	1592.94	1616.67	1658.17	1650.11	1658.17	1654.78	1652.39	1668.17	1645.83	1655.89	1656.44
64	PEV (Pre-Erythrocytic Vaccine)	3	0.35	4	100	Infants	6, 10, &, 14 weeks	None	0.893855	0.95	0.97	0.97	NA	NA	5-17mo	0 yrs	None	0.89	0.95	0.97	0.97	NA	NA	None	NA	NA	NA	NA	NA	NA	NA	NA	0.4	Deaths per 100,000 population	346.556	343.389	354.111	361.222	363.333	362.333	374.889	369.222	371.389	371.556	372.833	373.722	374.889	374.444	369.056
64	PEV (Pre-Erythrocytic Vaccine)	3	0.35	4	100	Infants	6, 10, &, 14 weeks	None	0.893855	0.95	0.97	0.97	NA	NA	5-17mo	0 yrs	None	0.89	0.95	0.97	0.97	NA	NA	None	NA	NA	NA	NA	NA	NA	NA	NA	0.4	Cases in <5yo per 100,000 population	50464.9	49329	49480.5	49857.8	50186.8	50435.8	50497.6	50486.4	50439.3	50484.7	50571.8	50476.4	50560	50519.9	50527.8
64	PEV (Pre-Erythrocytic Vaccine)	3	0.35	4	100	Infants	6, 10, &, 14 weeks	None	0.893855	0.95	0.97	0.97	NA	NA	5-17mo	0 yrs	None	0.89	0.95	0.97	0.97	NA	NA	None	NA	NA	NA	NA	NA	NA	NA	NA	0.4	Severe Cases in <5yo per 100,000 population	1298.61	1338.33	1400.67	1452.61	1457.22	1469.67	1498.78	1485.61	1492.72	1480.22	1479.33	1494	1470.22	1479.22	1482
64	PEV (Pre-Erythrocytic Vaccine)	3	0.35	4	100	Infants	6, 10, &, 14 weeks	None	0.893855	0.95	0.97	0.97	NA	NA	5-17mo	0 yrs	None	0.89	0.95	0.97	0.97	NA	NA	None	NA	NA	NA	NA	NA	NA	NA	NA	0.4	Deaths in < 5yo per 100,000 population	315.556	309.889	321.5	329	332.722	327.056	337.111	328.722	333.667	331.389	333.667	328.944	331.889	330.111	325.5
64	PEV (Pre-Erythrocytic Vaccine)	3	0.35	4	100	Infants	6, 10, &, 14 weeks	None	0.893855	0.95	0.97	0.97	NA	NA	5-17mo	0 yrs	None	0.89	0.95	0.97	0.97	NA	NA	None	NA	NA	NA	NA	NA	NA	NA	NA	0.4	DALYs per 100,000 population	9332.97	9253.94	9537.13	9775.18	9828.3	9786.65	10118.1	9962.04	10042.7	10034.1	10075.3	10085.5	10123.4	10133.5	9968.59
64	PEV (Pre-Erythrocytic Vaccine)	3	0.35	4	100	Infants	6, 10, &, 14 weeks	None	0.893855	0.95	0.97	0.97	NA	NA	5-17mo	0 yrs	None	0.89	0.95	0.97	0.97	NA	NA	None	NA	NA	NA	NA	NA	NA	NA	NA	0.4	Income and productivity gains from delivering vaccine (US$ / dose)	0.236255	0.458043	0.41048	0.316139	0.124268	-0.116077	-0.396851	-0.608242	-0.826385	-0.971755	-1.11522	-1.24224	-1.31899	-1.37208	-1.44637
65	PEV (Pre-Erythrocytic Vaccine)	3	0.35	4	100	Infants	6, 10, &, 14 weeks	None	0.893855	0.95	0.97	0.97	NA	NA	5-17mo	0 yrs	None	0.7	0.81	0.93	0.93	NA	NA	None	NA	NA	NA	NA	NA	NA	NA	NA	0.4	Cases per 100,000 population	109301	108083	108238	108665	109769	110798	111799	112901	113862	114625	115288	115861	116160	116483	116722
65	PEV (Pre-Erythrocytic Vaccine)	3	0.35	4	100	Infants	6, 10, &, 14 weeks	None	0.893855	0.95	0.97	0.97	NA	NA	5-17mo	0 yrs	None	0.7	0.81	0.93	0.93	NA	NA	None	NA	NA	NA	NA	NA	NA	NA	NA	0.4	Severe Cases per 100,000 population	1428.7	1453.87	1525.7	1576	1602.7	1621.87	1649.22	1636.35	1648.22	1666.65	1662.13	1651.35	1664.09	1645.39	1640.57
65	PEV (Pre-Erythrocytic Vaccine)	3	0.35	4	100	Infants	6, 10, &, 14 weeks	None	0.893855	0.95	0.97	0.97	NA	NA	5-17mo	0 yrs	None	0.7	0.81	0.93	0.93	NA	NA	None	NA	NA	NA	NA	NA	NA	NA	NA	0.4	Deaths per 100,000 population	351.652	339.043	352.739	360.391	362.696	363.261	365.522	372.217	362.739	372.565	369.957	368	373	368.435	370.478
65	PEV (Pre-Erythrocytic Vaccine)	3	0.35	4	100	Infants	6, 10, &, 14 weeks	None	0.893855	0.95	0.97	0.97	NA	NA	5-17mo	0 yrs	None	0.7	0.81	0.93	0.93	NA	NA	None	NA	NA	NA	NA	NA	NA	NA	NA	0.4	Cases in <5yo per 100,000 population	50645.8	49352.7	49440.1	49852	50234.3	50420.8	50438	50394.9	50456.2	50402.4	50528	50573.3	50525.5	50539.9	50573.2
65	PEV (Pre-Erythrocytic Vaccine)	3	0.35	4	100	Infants	6, 10, &, 14 weeks	None	0.893855	0.95	0.97	0.97	NA	NA	5-17mo	0 yrs	None	0.7	0.81	0.93	0.93	NA	NA	None	NA	NA	NA	NA	NA	NA	NA	NA	0.4	Severe Cases in <5yo per 100,000 population	1310.87	1336.26	1406.7	1453	1472.96	1475.35	1490.65	1470.39	1481.43	1493.04	1488.61	1476.7	1486.74	1469.7	1467.43
65	PEV (Pre-Erythrocytic Vaccine)	3	0.35	4	100	Infants	6, 10, &, 14 weeks	None	0.893855	0.95	0.97	0.97	NA	NA	5-17mo	0 yrs	None	0.7	0.81	0.93	0.93	NA	NA	None	NA	NA	NA	NA	NA	NA	NA	NA	0.4	Deaths in < 5yo per 100,000 population	321.174	308.087	321.304	327.391	329.217	325.913	328.957	334.783	322.913	329.217	328.348	325.043	330.261	323.174	327.13
65	PEV (Pre-Erythrocytic Vaccine)	3	0.35	4	100	Infants	6, 10, &, 14 weeks	None	0.893855	0.95	0.97	0.97	NA	NA	5-17mo	0 yrs	None	0.7	0.81	0.93	0.93	NA	NA	None	NA	NA	NA	NA	NA	NA	NA	NA	0.4	DALYs per 100,000 population	9469.25	9131.23	9489.59	9718.61	9779.35	9796.79	9871.33	10060.1	9820.68	10058.2	9991.74	9957.35	10069.5	9961.29	10003.4
65	PEV (Pre-Erythrocytic Vaccine)	3	0.35	4	100	Infants	6, 10, &, 14 weeks	None	0.893855	0.95	0.97	0.97	NA	NA	5-17mo	0 yrs	None	0.7	0.81	0.93	0.93	NA	NA	None	NA	NA	NA	NA	NA	NA	NA	NA	0.4	Income and productivity gains from delivering vaccine (US$ / dose)	0.245286	0.463941	0.409048	0.345525	0.114174	-0.110122	-0.340426	-0.590186	-0.806668	-0.992283	-1.11481	-1.23822	-1.31736	-1.37652	-1.42206
66	PEV (Pre-Erythrocytic Vaccine)	3	0.35	4	100	Infants	6, 10, &, 14 weeks	None	0.893855	0.95	0.97	0.97	NA	NA	5-17mo	0 yrs	None	0.5	0.69	0.85	0.85	NA	NA	None	NA	NA	NA	NA	NA	NA	NA	NA	0.4	Cases per 100,000 population	109560	108187	108214	108679	109600	110762	111864	112872	113792	114636	115289	115826	116155	116517	116707
66	PEV (Pre-Erythrocytic Vaccine)	3	0.35	4	100	Infants	6, 10, &, 14 weeks	None	0.893855	0.95	0.97	0.97	NA	NA	5-17mo	0 yrs	None	0.5	0.69	0.85	0.85	NA	NA	None	NA	NA	NA	NA	NA	NA	NA	NA	0.4	Severe Cases per 100,000 population	1441.31	1454.21	1522.41	1568.67	1603.41	1619.26	1622.03	1642.08	1653.21	1641.85	1649.31	1643.31	1651.56	1650.13	1652.72
66	PEV (Pre-Erythrocytic Vaccine)	3	0.35	4	100	Infants	6, 10, &, 14 weeks	None	0.893855	0.95	0.97	0.97	NA	NA	5-17mo	0 yrs	None	0.5	0.69	0.85	0.85	NA	NA	None	NA	NA	NA	NA	NA	NA	NA	NA	0.4	Deaths per 100,000 population	356.128	342.923	350.897	357.846	362.641	367.103	364.974	368.795	367.359	370.231	370.564	371.179	371.769	371.897	372.282
66	PEV (Pre-Erythrocytic Vaccine)	3	0.35	4	100	Infants	6, 10, &, 14 weeks	None	0.893855	0.95	0.97	0.97	NA	NA	5-17mo	0 yrs	None	0.5	0.69	0.85	0.85	NA	NA	None	NA	NA	NA	NA	NA	NA	NA	NA	0.4	Cases in <5yo per 100,000 population	50804.9	49476.8	49430.2	49805	50165.2	50443.3	50423.6	50512.8	50481.4	50506.5	50564.8	50548.1	50531.4	50550.3	50567.8
66	PEV (Pre-Erythrocytic Vaccine)	3	0.35	4	100	Infants	6, 10, &, 14 weeks	None	0.893855	0.95	0.97	0.97	NA	NA	5-17mo	0 yrs	None	0.5	0.69	0.85	0.85	NA	NA	None	NA	NA	NA	NA	NA	NA	NA	NA	0.4	Severe Cases in <5yo per 100,000 population	1322.74	1337.62	1403.1	1448.64	1473.26	1477.64	1468.49	1479.05	1481.97	1472.36	1473.92	1468.18	1476.9	1476.72	1474
66	PEV (Pre-Erythrocytic Vaccine)	3	0.35	4	100	Infants	6, 10, &, 14 weeks	None	0.893855	0.95	0.97	0.97	NA	NA	5-17mo	0 yrs	None	0.5	0.69	0.85	0.85	NA	NA	None	NA	NA	NA	NA	NA	NA	NA	NA	0.4	Deaths in < 5yo per 100,000 population	324.846	313.59	318.513	324.59	329	330.538	326.923	328.359	326.077	328.59	328	329.487	328.949	330.846	329.385
66	PEV (Pre-Erythrocytic Vaccine)	3	0.35	4	100	Infants	6, 10, &, 14 weeks	None	0.893855	0.95	0.97	0.97	NA	NA	5-17mo	0 yrs	None	0.5	0.69	0.85	0.85	NA	NA	None	NA	NA	NA	NA	NA	NA	NA	NA	0.4	DALYs per 100,000 population	9579.92	9241.33	9461.31	9665.83	9785.59	9910.86	9850.32	9963.62	9935.95	9996.46	10015.9	10042.2	10039.7	10040.8	10056.6
66	PEV (Pre-Erythrocytic Vaccine)	3	0.35	4	100	Infants	6, 10, &, 14 weeks	None	0.893855	0.95	0.97	0.97	NA	NA	5-17mo	0 yrs	None	0.5	0.69	0.85	0.85	NA	NA	None	NA	NA	NA	NA	NA	NA	NA	NA	0.4	Income and productivity gains from delivering vaccine (US$ / dose)	0.218188	0.456776	0.41062	0.33708	0.146239	-0.0952957	-0.345544	-0.573099	-0.794027	-0.968831	-1.10427	-1.22742	-1.30756	-1.38548	-1.43831
67	PEV (Pre-Erythrocytic Vaccine)	3	0.35	4	100	Infants	6, 10, &, 14 weeks	None	0.700569	0.81	0.93	0.93	NA	NA	5-17mo	0 yrs	None	0.89	0.95	0.97	0.97	NA	NA	None	NA	NA	NA	NA	NA	NA	NA	NA	0.4	Cases per 100,000 population	109306	108531	108727	109459	110458	111226	112241	113116	113799	114162	114774	115268	115341	115852	115852
67	PEV (Pre-Erythrocytic Vaccine)	3	0.35	4	100	Infants	6, 10, &, 14 weeks	None	0.700569	0.81	0.93	0.93	NA	NA	5-17mo	0 yrs	None	0.89	0.95	0.97	0.97	NA	NA	None	NA	NA	NA	NA	NA	NA	NA	NA	0.4	Severe Cases per 100,000 population	1423.76	1482.71	1521.76	1569.06	1590.47	1605.29	1641.35	1615.41	1629.53	1636.71	1645.88	1637	1619.41	1626.59	1629.29
67	PEV (Pre-Erythrocytic Vaccine)	3	0.35	4	100	Infants	6, 10, &, 14 weeks	None	0.700569	0.81	0.93	0.93	NA	NA	5-17mo	0 yrs	None	0.89	0.95	0.97	0.97	NA	NA	None	NA	NA	NA	NA	NA	NA	NA	NA	0.4	Deaths per 100,000 population	338.882	350.412	357.647	353.294	360.294	369.529	367.412	367.235	361.824	361.882	372.118	366.647	375.647	364	374.824
67	PEV (Pre-Erythrocytic Vaccine)	3	0.35	4	100	Infants	6, 10, &, 14 weeks	None	0.700569	0.81	0.93	0.93	NA	NA	5-17mo	0 yrs	None	0.89	0.95	0.97	0.97	NA	NA	None	NA	NA	NA	NA	NA	NA	NA	NA	0.4	Cases in <5yo per 100,000 population	50562.2	49779.9	50032.2	50501.5	50836.8	50886.9	50954.1	51000.7	50981.1	50892.1	50932.7	50992.2	50992.7	51215.3	51021.4
67	PEV (Pre-Erythrocytic Vaccine)	3	0.35	4	100	Infants	6, 10, &, 14 weeks	None	0.700569	0.81	0.93	0.93	NA	NA	5-17mo	0 yrs	None	0.89	0.95	0.97	0.97	NA	NA	None	NA	NA	NA	NA	NA	NA	NA	NA	0.4	Severe Cases in <5yo per 100,000 population	1311.06	1366.65	1406.12	1451.12	1455.24	1461.47	1484.47	1460.24	1471.24	1474.88	1486.76	1472	1460.47	1464.24	1469.41
67	PEV (Pre-Erythrocytic Vaccine)	3	0.35	4	100	Infants	6, 10, &, 14 weeks	None	0.700569	0.81	0.93	0.93	NA	NA	5-17mo	0 yrs	None	0.89	0.95	0.97	0.97	NA	NA	None	NA	NA	NA	NA	NA	NA	NA	NA	0.4	Deaths in < 5yo per 100,000 population	308	316.882	326.176	319.471	326.588	332.588	329.176	329.412	322.941	322.765	333.765	327.529	334.647	323.824	334.118
67	PEV (Pre-Erythrocytic Vaccine)	3	0.35	4	100	Infants	6, 10, &, 14 weeks	None	0.700569	0.81	0.93	0.93	NA	NA	5-17mo	0 yrs	None	0.89	0.95	0.97	0.97	NA	NA	None	NA	NA	NA	NA	NA	NA	NA	NA	0.4	DALYs per 100,000 population	9174.65	9445.12	9653.34	9560.09	9725.64	9951.85	9925.61	9922.91	9776.29	9800.93	10047.7	9905.85	10124.4	9842.1	10083.9
67	PEV (Pre-Erythrocytic Vaccine)	3	0.35	4	100	Infants	6, 10, &, 14 weeks	None	0.700569	0.81	0.93	0.93	NA	NA	5-17mo	0 yrs	None	0.89	0.95	0.97	0.97	NA	NA	None	NA	NA	NA	NA	NA	NA	NA	NA	0.4	Income and productivity gains from delivering vaccine (US$ / dose)	0.267372	0.491264	0.443406	0.289106	0.0398207	-0.171581	-0.461033	-0.670556	-0.88144	-0.99898	-1.14658	-1.27955	-1.28002	-1.39876	-1.4228
68	PEV (Pre-Erythrocytic Vaccine)	3	0.35	4	100	Infants	6, 10, &, 14 weeks	None	0.700569	0.81	0.93	0.93	NA	NA	5-17mo	0 yrs	None	0.7	0.81	0.93	0.93	NA	NA	None	NA	NA	NA	NA	NA	NA	NA	NA	0.4	Cases per 100,000 population	109288	108597	108765	109455	110259	111249	112102	112975	113702	114381	114723	115203	115525	115579	115897
68	PEV (Pre-Erythrocytic Vaccine)	3	0.35	4	100	Infants	6, 10, &, 14 weeks	None	0.700569	0.81	0.93	0.93	NA	NA	5-17mo	0 yrs	None	0.7	0.81	0.93	0.93	NA	NA	None	NA	NA	NA	NA	NA	NA	NA	NA	0.4	Severe Cases per 100,000 population	1438.43	1469.95	1525.95	1559.19	1593.76	1597.48	1625.05	1607.29	1628.24	1626.05	1634.1	1635.48	1636.86	1630.71	1637.48
68	PEV (Pre-Erythrocytic Vaccine)	3	0.35	4	100	Infants	6, 10, &, 14 weeks	None	0.700569	0.81	0.93	0.93	NA	NA	5-17mo	0 yrs	None	0.7	0.81	0.93	0.93	NA	NA	None	NA	NA	NA	NA	NA	NA	NA	NA	0.4	Deaths per 100,000 population	345.286	346.952	350.333	361.381	370.476	365.667	373.714	366.667	369.524	368.952	367.19	379.714	376.524	368.333	369.81
68	PEV (Pre-Erythrocytic Vaccine)	3	0.35	4	100	Infants	6, 10, &, 14 weeks	None	0.700569	0.81	0.93	0.93	NA	NA	5-17mo	0 yrs	None	0.7	0.81	0.93	0.93	NA	NA	None	NA	NA	NA	NA	NA	NA	NA	NA	0.4	Cases in <5yo per 100,000 population	50672.2	49881.1	50010.1	50587.5	50760.5	50967.9	50961.8	50937.3	50987.4	51042.8	50921.9	51063.3	51065.2	50938.8	51064
68	PEV (Pre-Erythrocytic Vaccine)	3	0.35	4	100	Infants	6, 10, &, 14 weeks	None	0.700569	0.81	0.93	0.93	NA	NA	5-17mo	0 yrs	None	0.7	0.81	0.93	0.93	NA	NA	None	NA	NA	NA	NA	NA	NA	NA	NA	0.4	Severe Cases in <5yo per 100,000 population	1319.95	1352.52	1410.48	1442.76	1461.52	1458	1471.14	1451.52	1467.86	1463.19	1473	1470.57	1468.76	1459.43	1473.76
68	PEV (Pre-Erythrocytic Vaccine)	3	0.35	4	100	Infants	6, 10, &, 14 weeks	None	0.700569	0.81	0.93	0.93	NA	NA	5-17mo	0 yrs	None	0.7	0.81	0.93	0.93	NA	NA	None	NA	NA	NA	NA	NA	NA	NA	NA	0.4	Deaths in < 5yo per 100,000 population	312.238	315.429	320.19	329.905	336.19	330.476	335.905	327.429	330.19	330.048	325.667	338.429	335.571	325.619	330.048
68	PEV (Pre-Erythrocytic Vaccine)	3	0.35	4	100	Infants	6, 10, &, 14 weeks	None	0.700569	0.81	0.93	0.93	NA	NA	5-17mo	0 yrs	None	0.7	0.81	0.93	0.93	NA	NA	None	NA	NA	NA	NA	NA	NA	NA	NA	0.4	DALYs per 100,000 population	9327.22	9365.94	9451.79	9743.68	9969.98	9873.72	10090.5	9899.29	9980.79	9971.56	9901.54	10256.9	10173.7	9946.9	9977.82
68	PEV (Pre-Erythrocytic Vaccine)	3	0.35	4	100	Infants	6, 10, &, 14 weeks	None	0.700569	0.81	0.93	0.93	NA	NA	5-17mo	0 yrs	None	0.7	0.81	0.93	0.93	NA	NA	None	NA	NA	NA	NA	NA	NA	NA	NA	0.4	Income and productivity gains from delivering vaccine (US$ / dose)	0.280018	0.487722	0.424422	0.312244	0.0838903	-0.166788	-0.418885	-0.648002	-0.851012	-1.03303	-1.13885	-1.2458	-1.34503	-1.35961	-1.43713
69	PEV (Pre-Erythrocytic Vaccine)	3	0.35	4	100	Infants	6, 10, &, 14 weeks	None	0.700569	0.81	0.93	0.93	NA	NA	5-17mo	0 yrs	None	0.5	0.69	0.85	0.85	NA	NA	None	NA	NA	NA	NA	NA	NA	NA	NA	0.4	Cases per 100,000 population	109590	108658	108945	109382	110057	111124	111993	112951	113567	114196	114647	115182	115405	115618	115855
69	PEV (Pre-Erythrocytic Vaccine)	3	0.35	4	100	Infants	6, 10, &, 14 weeks	None	0.700569	0.81	0.93	0.93	NA	NA	5-17mo	0 yrs	None	0.5	0.69	0.85	0.85	NA	NA	None	NA	NA	NA	NA	NA	NA	NA	NA	0.4	Severe Cases per 100,000 population	1445.06	1481	1536.67	1574.39	1592.06	1606.78	1614.17	1648.83	1639.72	1621.22	1631.5	1619.17	1627.11	1623.61	1637.11
69	PEV (Pre-Erythrocytic Vaccine)	3	0.35	4	100	Infants	6, 10, &, 14 weeks	None	0.700569	0.81	0.93	0.93	NA	NA	5-17mo	0 yrs	None	0.5	0.69	0.85	0.85	NA	NA	None	NA	NA	NA	NA	NA	NA	NA	NA	0.4	Deaths per 100,000 population	348.667	350.333	357	359.778	367.056	362.278	357.5	371.444	378.333	376.833	373.778	364.222	365.056	366.778	371.5
69	PEV (Pre-Erythrocytic Vaccine)	3	0.35	4	100	Infants	6, 10, &, 14 weeks	None	0.700569	0.81	0.93	0.93	NA	NA	5-17mo	0 yrs	None	0.5	0.69	0.85	0.85	NA	NA	None	NA	NA	NA	NA	NA	NA	NA	NA	0.4	Cases in <5yo per 100,000 population	50934.1	49988.8	50181.3	50484.4	50716.5	50989.4	50865.1	51023.6	50995.1	50992.8	50901.1	51014.8	51050.3	51000.6	51025.4
69	PEV (Pre-Erythrocytic Vaccine)	3	0.35	4	100	Infants	6, 10, &, 14 weeks	None	0.700569	0.81	0.93	0.93	NA	NA	5-17mo	0 yrs	None	0.5	0.69	0.85	0.85	NA	NA	None	NA	NA	NA	NA	NA	NA	NA	NA	0.4	Severe Cases in <5yo per 100,000 population	1328.11	1365.28	1415.33	1458.39	1458.56	1470.28	1467.11	1494.78	1482.06	1459.56	1474.28	1453	1467.28	1460	1473.89
69	PEV (Pre-Erythrocytic Vaccine)	3	0.35	4	100	Infants	6, 10, &, 14 weeks	None	0.700569	0.81	0.93	0.93	NA	NA	5-17mo	0 yrs	None	0.5	0.69	0.85	0.85	NA	NA	None	NA	NA	NA	NA	NA	NA	NA	NA	0.4	Deaths in < 5yo per 100,000 population	317.778	319	323.778	328.611	336.889	327.278	321.833	333.611	338.222	337.389	332.889	325.833	326.611	328	331.5
69	PEV (Pre-Erythrocytic Vaccine)	3	0.35	4	100	Infants	6, 10, &, 14 weeks	None	0.700569	0.81	0.93	0.93	NA	NA	5-17mo	0 yrs	None	0.5	0.69	0.85	0.85	NA	NA	None	NA	NA	NA	NA	NA	NA	NA	NA	0.4	DALYs per 100,000 population	9400.57	9442.56	9607.27	9703.46	9899.06	9784.59	9642.54	10044	10204	10166	10066.7	9848.32	9861.96	9903.25	10036.9
69	PEV (Pre-Erythrocytic Vaccine)	3	0.35	4	100	Infants	6, 10, &, 14 weeks	None	0.700569	0.81	0.93	0.93	NA	NA	5-17mo	0 yrs	None	0.5	0.69	0.85	0.85	NA	NA	None	NA	NA	NA	NA	NA	NA	NA	NA	0.4	Income and productivity gains from delivering vaccine (US$ / dose)	0.255406	0.479421	0.391696	0.311666	0.134782	-0.133394	-0.396415	-0.646197	-0.817484	-0.979147	-1.10846	-1.24691	-1.30091	-1.33914	-1.44193
70	PEV (Pre-Erythrocytic Vaccine)	3	0.35	4	100	Infants	6, 10, &, 14 weeks	None	0.498525	0.69	0.85	0.85	NA	NA	5-17mo	0 yrs	None	0.89	0.95	0.97	0.97	NA	NA	None	NA	NA	NA	NA	NA	NA	NA	NA	0.4	Cases per 100,000 population	109515	108953	109397	110054	110921	111709	112568	112995	113667	114079	114247	114554	114737	114894	115085
70	PEV (Pre-Erythrocytic Vaccine)	3	0.35	4	100	Infants	6, 10, &, 14 weeks	None	0.498525	0.69	0.85	0.85	NA	NA	5-17mo	0 yrs	None	0.89	0.95	0.97	0.97	NA	NA	None	NA	NA	NA	NA	NA	NA	NA	NA	0.4	Severe Cases per 100,000 population	1439.55	1480.95	1535.95	1578.05	1564.75	1589.5	1598.55	1614.15	1602.15	1614.75	1603.7	1615.25	1611.1	1612.55	1599.9
70	PEV (Pre-Erythrocytic Vaccine)	3	0.35	4	100	Infants	6, 10, &, 14 weeks	None	0.498525	0.69	0.85	0.85	NA	NA	5-17mo	0 yrs	None	0.89	0.95	0.97	0.97	NA	NA	None	NA	NA	NA	NA	NA	NA	NA	NA	0.4	Deaths per 100,000 population	350.45	345.2	359.15	358.35	358.8	371.95	374.4	374.2	367.6	373.15	365.75	372.35	374.8	370.05	373.3
70	PEV (Pre-Erythrocytic Vaccine)	3	0.35	4	100	Infants	6, 10, &, 14 weeks	None	0.498525	0.69	0.85	0.85	NA	NA	5-17mo	0 yrs	None	0.89	0.95	0.97	0.97	NA	NA	None	NA	NA	NA	NA	NA	NA	NA	NA	0.4	Cases in <5yo per 100,000 population	50756.3	50226.3	50632.7	51219.2	51347.8	51477	51494.5	51477.6	51496.9	51565.8	51401	51517.7	51538.1	51452.6	51525.7
70	PEV (Pre-Erythrocytic Vaccine)	3	0.35	4	100	Infants	6, 10, &, 14 weeks	None	0.498525	0.69	0.85	0.85	NA	NA	5-17mo	0 yrs	None	0.89	0.95	0.97	0.97	NA	NA	None	NA	NA	NA	NA	NA	NA	NA	NA	0.4	Severe Cases in <5yo per 100,000 population	1323.3	1361	1421.75	1460.8	1435.7	1444.75	1453.1	1466.85	1451.8	1459.4	1456.3	1461.5	1456.6	1462.05	1450.65
70	PEV (Pre-Erythrocytic Vaccine)	3	0.35	4	100	Infants	6, 10, &, 14 weeks	None	0.498525	0.69	0.85	0.85	NA	NA	5-17mo	0 yrs	None	0.89	0.95	0.97	0.97	NA	NA	None	NA	NA	NA	NA	NA	NA	NA	NA	0.4	Deaths in < 5yo per 100,000 population	319.3	313.25	328.75	324.7	325.9	335	336.6	337.15	332.05	335.1	330.7	333.65	337.05	330.15	335.45
70	PEV (Pre-Erythrocytic Vaccine)	3	0.35	4	100	Infants	6, 10, &, 14 weeks	None	0.498525	0.69	0.85	0.85	NA	NA	5-17mo	0 yrs	None	0.89	0.95	0.97	0.97	NA	NA	None	NA	NA	NA	NA	NA	NA	NA	NA	0.4	DALYs per 100,000 population	9450.71	9303.02	9702.63	9677.09	9674.71	10041.3	10095.5	10101.2	9935.83	10066.8	9879.17	10043.2	10108.7	9982.71	10062.8
70	PEV (Pre-Erythrocytic Vaccine)	3	0.35	4	100	Infants	6, 10, &, 14 weeks	None	0.498525	0.69	0.85	0.85	NA	NA	5-17mo	0 yrs	None	0.89	0.95	0.97	0.97	NA	NA	None	NA	NA	NA	NA	NA	NA	NA	NA	0.4	Income and productivity gains from delivering vaccine (US$ / dose)	0.273918	0.544798	0.41761	0.280277	0.00273474	-0.275532	-0.568635	-0.731789	-0.93133	-1.09957	-1.16248	-1.26693	-1.31945	-1.34488	-1.40922
71	PEV (Pre-Erythrocytic Vaccine)	3	0.35	4	100	Infants	6, 10, &, 14 weeks	None	0.498525	0.69	0.85	0.85	NA	NA	5-17mo	0 yrs	None	0.7	0.81	0.93	0.93	NA	NA	None	NA	NA	NA	NA	NA	NA	NA	NA	0.4	Cases per 100,000 population	109504	109143	109411	110022	110823	111588	112306	112923	113529	113975	114279	114476	114793	114903	114991
71	PEV (Pre-Erythrocytic Vaccine)	3	0.35	4	100	Infants	6, 10, &, 14 weeks	None	0.498525	0.69	0.85	0.85	NA	NA	5-17mo	0 yrs	None	0.7	0.81	0.93	0.93	NA	NA	None	NA	NA	NA	NA	NA	NA	NA	NA	0.4	Severe Cases per 100,000 population	1443.12	1509.42	1540.62	1571.35	1593.77	1585.04	1590	1603.77	1608.62	1607.88	1604	1598.96	1597.62	1602.58	1620.27
71	PEV (Pre-Erythrocytic Vaccine)	3	0.35	4	100	Infants	6, 10, &, 14 weeks	None	0.498525	0.69	0.85	0.85	NA	NA	5-17mo	0 yrs	None	0.7	0.81	0.93	0.93	NA	NA	None	NA	NA	NA	NA	NA	NA	NA	NA	0.4	Deaths per 100,000 population	354.346	346.923	361.077	356.923	368.308	368.077	362.308	366.615	374.808	372.269	363.615	373.846	373.769	364.308	376.154
71	PEV (Pre-Erythrocytic Vaccine)	3	0.35	4	100	Infants	6, 10, &, 14 weeks	None	0.498525	0.69	0.85	0.85	NA	NA	5-17mo	0 yrs	None	0.7	0.81	0.93	0.93	NA	NA	None	NA	NA	NA	NA	NA	NA	NA	NA	0.4	Cases in <5yo per 100,000 population	50828.7	50404.5	50662.5	51233.6	51348.3	51480.5	51470.3	51435	51554.1	51484.8	51461.8	51434	51537.3	51588	51490.2
71	PEV (Pre-Erythrocytic Vaccine)	3	0.35	4	100	Infants	6, 10, &, 14 weeks	None	0.498525	0.69	0.85	0.85	NA	NA	5-17mo	0 yrs	None	0.7	0.81	0.93	0.93	NA	NA	None	NA	NA	NA	NA	NA	NA	NA	NA	0.4	Severe Cases in <5yo per 100,000 population	1322.65	1392.42	1419.81	1453.65	1461.5	1450.77	1445.62	1453.92	1454.58	1457.12	1449.35	1449.92	1445.42	1451.35	1464.73
71	PEV (Pre-Erythrocytic Vaccine)	3	0.35	4	100	Infants	6, 10, &, 14 weeks	None	0.498525	0.69	0.85	0.85	NA	NA	5-17mo	0 yrs	None	0.7	0.81	0.93	0.93	NA	NA	None	NA	NA	NA	NA	NA	NA	NA	NA	0.4	Deaths in < 5yo per 100,000 population	320.769	316.346	328.846	324.731	334.538	332.846	329.269	328.923	335.462	333.385	326.962	334.038	334.077	326.846	336
71	PEV (Pre-Erythrocytic Vaccine)	3	0.35	4	100	Infants	6, 10, &, 14 weeks	None	0.498525	0.69	0.85	0.85	NA	NA	5-17mo	0 yrs	None	0.7	0.81	0.93	0.93	NA	NA	None	NA	NA	NA	NA	NA	NA	NA	NA	0.4	DALYs per 100,000 population	9550.6	9356.77	9731.64	9636.84	9922.12	9915.69	9799.43	9876.1	10125.5	10029.9	9826.41	10080.9	10081.6	9842.9	10145.8
71	PEV (Pre-Erythrocytic Vaccine)	3	0.35	4	100	Infants	6, 10, &, 14 weeks	None	0.498525	0.69	0.85	0.85	NA	NA	5-17mo	0 yrs	None	0.7	0.81	0.93	0.93	NA	NA	None	NA	NA	NA	NA	NA	NA	NA	NA	0.4	Income and productivity gains from delivering vaccine (US$ / dose)	0.290922	0.480242	0.427704	0.296775	0.0121044	-0.222143	-0.478711	-0.694013	-0.884018	-1.07019	-1.15098	-1.24318	-1.33036	-1.33592	-1.42933
72	PEV (Pre-Erythrocytic Vaccine)	3	0.35	4	100	Infants	6, 10, &, 14 weeks	None	0.498525	0.69	0.85	0.85	NA	NA	5-17mo	0 yrs	None	0.5	0.69	0.85	0.85	NA	NA	None	NA	NA	NA	NA	NA	NA	NA	NA	0.4	Cases per 100,000 population	109825	109210	109600	110109	110838	111462	112258	112988	113395	113852	114259	114554	114712	114897	115149
72	PEV (Pre-Erythrocytic Vaccine)	3	0.35	4	100	Infants	6, 10, &, 14 weeks	None	0.498525	0.69	0.85	0.85	NA	NA	5-17mo	0 yrs	None	0.5	0.69	0.85	0.85	NA	NA	None	NA	NA	NA	NA	NA	NA	NA	NA	0.4	Severe Cases per 100,000 population	1450.82	1485.65	1533.53	1561	1584.65	1578.24	1627.65	1614.71	1617.35	1616.18	1599.24	1626.41	1604.82	1593.88	1599.47
72	PEV (Pre-Erythrocytic Vaccine)	3	0.35	4	100	Infants	6, 10, &, 14 weeks	None	0.498525	0.69	0.85	0.85	NA	NA	5-17mo	0 yrs	None	0.5	0.69	0.85	0.85	NA	NA	None	NA	NA	NA	NA	NA	NA	NA	NA	0.4	Deaths per 100,000 population	351.059	347.294	359.176	360.353	363.882	366.176	369.235	372.412	370.529	367.235	366.471	368.353	365.353	363.882	363.471
72	PEV (Pre-Erythrocytic Vaccine)	3	0.35	4	100	Infants	6, 10, &, 14 weeks	None	0.498525	0.69	0.85	0.85	NA	NA	5-17mo	0 yrs	None	0.5	0.69	0.85	0.85	NA	NA	None	NA	NA	NA	NA	NA	NA	NA	NA	0.4	Cases in <5yo per 100,000 population	51058.2	50492.4	50745.5	51237.7	51384.9	51413.2	51439.2	51537.9	51495.8	51447.5	51521.4	51471	51487.7	51510.7	51581.9
72	PEV (Pre-Erythrocytic Vaccine)	3	0.35	4	100	Infants	6, 10, &, 14 weeks	None	0.498525	0.69	0.85	0.85	NA	NA	5-17mo	0 yrs	None	0.5	0.69	0.85	0.85	NA	NA	None	NA	NA	NA	NA	NA	NA	NA	NA	0.4	Severe Cases in <5yo per 100,000 population	1338.18	1367.53	1411.06	1443.59	1455.12	1443.47	1478.82	1465.82	1461.18	1457.12	1447.59	1472.59	1453.88	1445.29	1451.94
72	PEV (Pre-Erythrocytic Vaccine)	3	0.35	4	100	Infants	6, 10, &, 14 weeks	None	0.498525	0.69	0.85	0.85	NA	NA	5-17mo	0 yrs	None	0.5	0.69	0.85	0.85	NA	NA	None	NA	NA	NA	NA	NA	NA	NA	NA	0.4	Deaths in < 5yo per 100,000 population	321.765	315.059	326.765	329.824	330.588	332.471	333.353	336.412	333.588	329.882	328.588	331.059	325.941	326	326.765
72	PEV (Pre-Erythrocytic Vaccine)	3	0.35	4	100	Infants	6, 10, &, 14 weeks	None	0.498525	0.69	0.85	0.85	NA	NA	5-17mo	0 yrs	None	0.5	0.69	0.85	0.85	NA	NA	None	NA	NA	NA	NA	NA	NA	NA	NA	0.4	DALYs per 100,000 population	9465.24	9370.12	9681.08	9715.58	9815.41	9877.8	9951.98	10040.4	9992.34	9921.2	9890.22	9943.18	9847.41	9826.22	9837.15
72	PEV (Pre-Erythrocytic Vaccine)	3	0.35	4	100	Infants	6, 10, &, 14 weeks	None	0.498525	0.69	0.85	0.85	NA	NA	5-17mo	0 yrs	None	0.5	0.69	0.85	0.85	NA	NA	None	NA	NA	NA	NA	NA	NA	NA	NA	0.4	Income and productivity gains from delivering vaccine (US$ / dose)	0.247733	0.510081	0.373972	0.276115	0.0361312	-0.174445	-0.478829	-0.712025	-0.864119	-1.02241	-1.12553	-1.26713	-1.29496	-1.33422	-1.43121
73	PEV (Pre-Erythrocytic Vaccine)	3	0.35	10	0.1	Infants	6, 10, &, 14 weeks	None	0.893855	0.95	0.97	0.97	NA	NA	5-17mo	0 yrs	None	0.89	0.95	0.97	0.97	NA	NA	None	NA	NA	NA	NA	NA	NA	NA	NA	0.4	Cases per 100,000 population	8581.89	8510.07	8436.83	8346.52	8290.86	8182.41	7950.91	7866.63	7804.39	7657.85	7620.81	7453.15	7366.81	7290.95	7213.63
73	PEV (Pre-Erythrocytic Vaccine)	3	0.35	10	0.1	Infants	6, 10, &, 14 weeks	None	0.893855	0.95	0.97	0.97	NA	NA	5-17mo	0 yrs	None	0.89	0.95	0.97	0.97	NA	NA	None	NA	NA	NA	NA	NA	NA	NA	NA	0.4	Severe Cases per 100,000 population	148.982	144.582	143.464	140.845	139.527	136.855	131.764	131.782	130.073	126.636	128.155	127.2	124.945	123.109	123.664
73	PEV (Pre-Erythrocytic Vaccine)	3	0.35	10	0.1	Infants	6, 10, &, 14 weeks	None	0.893855	0.95	0.97	0.97	NA	NA	5-17mo	0 yrs	None	0.89	0.95	0.97	0.97	NA	NA	None	NA	NA	NA	NA	NA	NA	NA	NA	0.4	Deaths per 100,000 population	30.8455	29.9364	29.6727	29.9	29.4636	29.3455	28.4091	27.9636	27.0818	27.7636	27.2545	27.1	27.7182	25.9273	26.5
73	PEV (Pre-Erythrocytic Vaccine)	3	0.35	10	0.1	Infants	6, 10, &, 14 weeks	None	0.893855	0.95	0.97	0.97	NA	NA	5-17mo	0 yrs	None	0.89	0.95	0.97	0.97	NA	NA	None	NA	NA	NA	NA	NA	NA	NA	NA	0.4	Cases in <5yo per 100,000 population	662.255	599.464	557.755	509.7	502.2	483.591	468.473	460.336	463.027	450.227	450.273	446.373	438.409	430.155	429.364
73	PEV (Pre-Erythrocytic Vaccine)	3	0.35	10	0.1	Infants	6, 10, &, 14 weeks	None	0.893855	0.95	0.97	0.97	NA	NA	5-17mo	0 yrs	None	0.89	0.95	0.97	0.97	NA	NA	None	NA	NA	NA	NA	NA	NA	NA	NA	0.4	Severe Cases in <5yo per 100,000 population	34.4364	30.9636	28.7091	26.6182	26.3909	25.3545	24.5455	23.6636	24.4	23.3364	24.4273	23.8364	23.1273	22.7545	22.6455
73	PEV (Pre-Erythrocytic Vaccine)	3	0.35	10	0.1	Infants	6, 10, &, 14 weeks	None	0.893855	0.95	0.97	0.97	NA	NA	5-17mo	0 yrs	None	0.89	0.95	0.97	0.97	NA	NA	None	NA	NA	NA	NA	NA	NA	NA	NA	0.4	Deaths in < 5yo per 100,000 population	8.04545	7.6	7.1	6.71818	7.02727	7.12727	6.75455	6.83636	6.71818	6.84545	6.75455	6.64545	6.7	6.76364	6.6
73	PEV (Pre-Erythrocytic Vaccine)	3	0.35	10	0.1	Infants	6, 10, &, 14 weeks	None	0.893855	0.95	0.97	0.97	NA	NA	5-17mo	0 yrs	None	0.89	0.95	0.97	0.97	NA	NA	None	NA	NA	NA	NA	NA	NA	NA	NA	0.4	DALYs per 100,000 population	786.635	759.954	753.833	761.622	748.695	744.581	718.916	711.083	688.014	702.545	691.165	684.674	697.663	654.801	669.339
73	PEV (Pre-Erythrocytic Vaccine)	3	0.35	10	0.1	Infants	6, 10, &, 14 weeks	None	0.893855	0.95	0.97	0.97	NA	NA	5-17mo	0 yrs	None	0.89	0.95	0.97	0.97	NA	NA	None	NA	NA	NA	NA	NA	NA	NA	NA	0.4	Income and productivity gains from delivering vaccine (US$ / dose)	0.000555737	0.0145149	0.0265856	0.0432892	0.0572497	0.0813384	0.133286	0.148405	0.162175	0.196373	0.204345	0.243233	0.263995	0.27953	0.297501
74	PEV (Pre-Erythrocytic Vaccine)	3	0.35	10	0.1	Infants	6, 10, &, 14 weeks	None	0.893855	0.95	0.97	0.97	NA	NA	5-17mo	0 yrs	None	0.7	0.81	0.93	0.93	NA	NA	None	NA	NA	NA	NA	NA	NA	NA	NA	0.4	Cases per 100,000 population	8598.35	8522.44	8418.53	8337.82	8273.26	8205.49	8063.45	7945.06	7756.5	7707.58	7554.12	7460.78	7326.01	7297.85	7232.29
74	PEV (Pre-Erythrocytic Vaccine)	3	0.35	10	0.1	Infants	6, 10, &, 14 weeks	None	0.893855	0.95	0.97	0.97	NA	NA	5-17mo	0 yrs	None	0.7	0.81	0.93	0.93	NA	NA	None	NA	NA	NA	NA	NA	NA	NA	NA	0.4	Severe Cases per 100,000 population	149.7	146.882	140.864	139.8	140.245	135.791	134.164	132.973	127.236	128.136	127.782	125.764	124.891	124.045	122.918
74	PEV (Pre-Erythrocytic Vaccine)	3	0.35	10	0.1	Infants	6, 10, &, 14 weeks	None	0.893855	0.95	0.97	0.97	NA	NA	5-17mo	0 yrs	None	0.7	0.81	0.93	0.93	NA	NA	None	NA	NA	NA	NA	NA	NA	NA	NA	0.4	Deaths per 100,000 population	31.0364	31.9909	29.3727	28.6273	30.2636	28.2818	28.5182	28.0545	27.7818	27.7364	27.5	26.6818	26.2727	26.3	26.5182
74	PEV (Pre-Erythrocytic Vaccine)	3	0.35	10	0.1	Infants	6, 10, &, 14 weeks	None	0.893855	0.95	0.97	0.97	NA	NA	5-17mo	0 yrs	None	0.7	0.81	0.93	0.93	NA	NA	None	NA	NA	NA	NA	NA	NA	NA	NA	0.4	Cases in <5yo per 100,000 population	664.036	604.409	554.791	510.664	497.791	485.018	472.655	471.855	460.936	457.109	442.045	443.618	436.1	428.182	430.073
74	PEV (Pre-Erythrocytic Vaccine)	3	0.35	10	0.1	Infants	6, 10, &, 14 weeks	None	0.893855	0.95	0.97	0.97	NA	NA	5-17mo	0 yrs	None	0.7	0.81	0.93	0.93	NA	NA	None	NA	NA	NA	NA	NA	NA	NA	NA	0.4	Severe Cases in <5yo per 100,000 population	33.4	30.7545	28.4727	26.2091	26.2455	25.2636	25.6364	24.5818	23.9	24.5364	23.5364	23.9818	23.6273	22.6909	22.1273
74	PEV (Pre-Erythrocytic Vaccine)	3	0.35	10	0.1	Infants	6, 10, &, 14 weeks	None	0.893855	0.95	0.97	0.97	NA	NA	5-17mo	0 yrs	None	0.7	0.81	0.93	0.93	NA	NA	None	NA	NA	NA	NA	NA	NA	NA	NA	0.4	Deaths in < 5yo per 100,000 population	8.15455	8.14545	7.69091	6.93636	7.53636	6.77273	6.93636	6.80909	7.00909	6.67273	6.62727	6.66364	6.60909	6.68182	6.29091
74	PEV (Pre-Erythrocytic Vaccine)	3	0.35	10	0.1	Infants	6, 10, &, 14 weeks	None	0.893855	0.95	0.97	0.97	NA	NA	5-17mo	0 yrs	None	0.7	0.81	0.93	0.93	NA	NA	None	NA	NA	NA	NA	NA	NA	NA	NA	0.4	DALYs per 100,000 population	791.124	811.137	749.085	731.346	767.709	719.16	723.035	712.823	707.427	702.382	696.145	677.494	664.589	665.779	671.508
74	PEV (Pre-Erythrocytic Vaccine)	3	0.35	10	0.1	Infants	6, 10, &, 14 weeks	None	0.893855	0.95	0.97	0.97	NA	NA	5-17mo	0 yrs	None	0.7	0.81	0.93	0.93	NA	NA	None	NA	NA	NA	NA	NA	NA	NA	NA	0.4	Income and productivity gains from delivering vaccine (US$ / dose)	-0.00175711	0.0115095	0.0333537	0.0467772	0.0607255	0.0757887	0.10655	0.133221	0.174119	0.185796	0.21926	0.242001	0.272433	0.277787	0.294102
75	PEV (Pre-Erythrocytic Vaccine)	3	0.35	10	0.1	Infants	6, 10, &, 14 weeks	None	0.893855	0.95	0.97	0.97	NA	NA	5-17mo	0 yrs	None	0.5	0.69	0.85	0.85	NA	NA	None	NA	NA	NA	NA	NA	NA	NA	NA	0.4	Cases per 100,000 population	8609.23	8520.3	8448.73	8421.58	8313.28	8170.15	8032.43	7910.59	7716.95	7636.78	7527.32	7438.28	7346.46	7271.27	7239.5
75	PEV (Pre-Erythrocytic Vaccine)	3	0.35	10	0.1	Infants	6, 10, &, 14 weeks	None	0.893855	0.95	0.97	0.97	NA	NA	5-17mo	0 yrs	None	0.5	0.69	0.85	0.85	NA	NA	None	NA	NA	NA	NA	NA	NA	NA	NA	0.4	Severe Cases per 100,000 population	149.136	147	144.855	143.136	139.591	136.391	133.773	131.573	128.291	126.109	126.745	125.955	123.964	122.973	124.127
75	PEV (Pre-Erythrocytic Vaccine)	3	0.35	10	0.1	Infants	6, 10, &, 14 weeks	None	0.893855	0.95	0.97	0.97	NA	NA	5-17mo	0 yrs	None	0.5	0.69	0.85	0.85	NA	NA	None	NA	NA	NA	NA	NA	NA	NA	NA	0.4	Deaths per 100,000 population	31.2545	31.0091	29.2909	29.3727	29.2273	28.9273	27.4455	27.7273	27.1727	26.6273	27.7	27.0182	26.4818	26.0455	26.2182
75	PEV (Pre-Erythrocytic Vaccine)	3	0.35	10	0.1	Infants	6, 10, &, 14 weeks	None	0.893855	0.95	0.97	0.97	NA	NA	5-17mo	0 yrs	None	0.5	0.69	0.85	0.85	NA	NA	None	NA	NA	NA	NA	NA	NA	NA	NA	0.4	Cases in <5yo per 100,000 population	660.309	611.191	566.273	525.973	505.327	489.236	474.764	470.6	452.745	448.582	448.127	440.645	433.191	425.291	429.236
75	PEV (Pre-Erythrocytic Vaccine)	3	0.35	10	0.1	Infants	6, 10, &, 14 weeks	None	0.893855	0.95	0.97	0.97	NA	NA	5-17mo	0 yrs	None	0.5	0.69	0.85	0.85	NA	NA	None	NA	NA	NA	NA	NA	NA	NA	NA	0.4	Severe Cases in <5yo per 100,000 population	34.4455	30.8	29.7182	26.9273	26.4636	25.7727	24.3636	24.0909	23.4	23.6909	23.2	23.6364	22.5818	22.4182	22.1545
75	PEV (Pre-Erythrocytic Vaccine)	3	0.35	10	0.1	Infants	6, 10, &, 14 weeks	None	0.893855	0.95	0.97	0.97	NA	NA	5-17mo	0 yrs	None	0.5	0.69	0.85	0.85	NA	NA	None	NA	NA	NA	NA	NA	NA	NA	NA	0.4	Deaths in < 5yo per 100,000 population	8.25455	7.67273	6.87273	7.16364	6.66364	7.22727	6.36364	6.74545	6.61818	6.29091	6.60909	6.78182	6.66364	6.35455	6.15455
75	PEV (Pre-Erythrocytic Vaccine)	3	0.35	10	0.1	Infants	6, 10, &, 14 weeks	None	0.893855	0.95	0.97	0.97	NA	NA	5-17mo	0 yrs	None	0.5	0.69	0.85	0.85	NA	NA	None	NA	NA	NA	NA	NA	NA	NA	NA	0.4	DALYs per 100,000 population	794.486	787.733	744.056	745.761	740.586	735.906	694.061	705.652	688.687	673.757	701.661	683.505	669.113	657.257	662.306
75	PEV (Pre-Erythrocytic Vaccine)	3	0.35	10	0.1	Infants	6, 10, &, 14 weeks	None	0.893855	0.95	0.97	0.97	NA	NA	5-17mo	0 yrs	None	0.5	0.69	0.85	0.85	NA	NA	None	NA	NA	NA	NA	NA	NA	NA	NA	0.4	Income and productivity gains from delivering vaccine (US$ / dose)	-0.00360719	0.0123331	0.0239667	0.0273796	0.0516152	0.0832491	0.113126	0.141502	0.182152	0.201779	0.22768	0.24649	0.267885	0.284345	0.292615
76	PEV (Pre-Erythrocytic Vaccine)	3	0.35	10	0.1	Infants	6, 10, &, 14 weeks	None	0.700569	0.81	0.93	0.93	NA	NA	5-17mo	0 yrs	None	0.89	0.95	0.97	0.97	NA	NA	None	NA	NA	NA	NA	NA	NA	NA	NA	0.4	Cases per 100,000 population	8598	8493.23	8414.58	8300.92	8258.72	8169.93	8088.29	7987.98	7918.55	7799.87	7765.97	7650.75	7529.09	7454.51	7401
76	PEV (Pre-Erythrocytic Vaccine)	3	0.35	10	0.1	Infants	6, 10, &, 14 weeks	None	0.700569	0.81	0.93	0.93	NA	NA	5-17mo	0 yrs	None	0.89	0.95	0.97	0.97	NA	NA	None	NA	NA	NA	NA	NA	NA	NA	NA	0.4	Severe Cases per 100,000 population	147.745	144.818	142.209	138.909	140.427	137.818	137.418	133.682	134.673	132.927	132.727	130.027	127.027	129.318	128.327
76	PEV (Pre-Erythrocytic Vaccine)	3	0.35	10	0.1	Infants	6, 10, &, 14 weeks	None	0.700569	0.81	0.93	0.93	NA	NA	5-17mo	0 yrs	None	0.89	0.95	0.97	0.97	NA	NA	None	NA	NA	NA	NA	NA	NA	NA	NA	0.4	Deaths per 100,000 population	30.7	29.5273	29.4909	29.4364	30.5818	29.5455	28.5273	28.1	27.4455	27.7091	28.2727	27.5	27.5182	27.2909	27.9545
76	PEV (Pre-Erythrocytic Vaccine)	3	0.35	10	0.1	Infants	6, 10, &, 14 weeks	None	0.700569	0.81	0.93	0.93	NA	NA	5-17mo	0 yrs	None	0.89	0.95	0.97	0.97	NA	NA	None	NA	NA	NA	NA	NA	NA	NA	NA	0.4	Cases in <5yo per 100,000 population	661.264	605.355	558.136	527.573	526.155	510.855	509.573	504.382	502.4	493.982	493.173	485.545	474.155	466.682	463.109
76	PEV (Pre-Erythrocytic Vaccine)	3	0.35	10	0.1	Infants	6, 10, &, 14 weeks	None	0.700569	0.81	0.93	0.93	NA	NA	5-17mo	0 yrs	None	0.89	0.95	0.97	0.97	NA	NA	None	NA	NA	NA	NA	NA	NA	NA	NA	0.4	Severe Cases in <5yo per 100,000 population	33.4091	31.3727	29.6182	27.1545	27.6727	26.5091	27.7273	26.2727	26.4545	26.5455	25.6091	24.3545	25	25.2455	25.0455
76	PEV (Pre-Erythrocytic Vaccine)	3	0.35	10	0.1	Infants	6, 10, &, 14 weeks	None	0.700569	0.81	0.93	0.93	NA	NA	5-17mo	0 yrs	None	0.89	0.95	0.97	0.97	NA	NA	None	NA	NA	NA	NA	NA	NA	NA	NA	0.4	Deaths in < 5yo per 100,000 population	8.00909	7.6	7.86364	7.43636	7.81818	6.93636	7.42727	6.94545	6.90909	7.08182	7.21818	6.51818	6.54545	6.95455	7.08182
76	PEV (Pre-Erythrocytic Vaccine)	3	0.35	10	0.1	Infants	6, 10, &, 14 weeks	None	0.700569	0.81	0.93	0.93	NA	NA	5-17mo	0 yrs	None	0.89	0.95	0.97	0.97	NA	NA	None	NA	NA	NA	NA	NA	NA	NA	NA	0.4	DALYs per 100,000 population	783	754.569	752.752	747.926	772.766	750.669	727.48	715.065	696.107	703.94	714.421	698.476	695.208	688.913	704.858
76	PEV (Pre-Erythrocytic Vaccine)	3	0.35	10	0.1	Infants	6, 10, &, 14 weeks	None	0.700569	0.81	0.93	0.93	NA	NA	5-17mo	0 yrs	None	0.89	0.95	0.97	0.97	NA	NA	None	NA	NA	NA	NA	NA	NA	NA	NA	0.4	Income and productivity gains from delivering vaccine (US$ / dose)	-0.00129865	0.0228344	0.0396241	0.0701004	0.0816593	0.106244	0.125482	0.151661	0.16917	0.203085	0.212513	0.244675	0.280653	0.296109	0.312914
77	PEV (Pre-Erythrocytic Vaccine)	3	0.35	10	0.1	Infants	6, 10, &, 14 weeks	None	0.700569	0.81	0.93	0.93	NA	NA	5-17mo	0 yrs	None	0.7	0.81	0.93	0.93	NA	NA	None	NA	NA	NA	NA	NA	NA	NA	NA	0.4	Cases per 100,000 population	8578.05	8456.65	8404.49	8321.43	8247.04	8146.47	8070.55	8013.77	7881.85	7777.14	7629.95	7593.5	7560.96	7486.49	7437.26
77	PEV (Pre-Erythrocytic Vaccine)	3	0.35	10	0.1	Infants	6, 10, &, 14 weeks	None	0.700569	0.81	0.93	0.93	NA	NA	5-17mo	0 yrs	None	0.7	0.81	0.93	0.93	NA	NA	None	NA	NA	NA	NA	NA	NA	NA	NA	0.4	Severe Cases per 100,000 population	148.855	143.518	143.073	140.845	138.773	138.809	137.373	134.8	133.973	132.727	126.855	130.018	130.582	128.782	128.491
77	PEV (Pre-Erythrocytic Vaccine)	3	0.35	10	0.1	Infants	6, 10, &, 14 weeks	None	0.700569	0.81	0.93	0.93	NA	NA	5-17mo	0 yrs	None	0.7	0.81	0.93	0.93	NA	NA	None	NA	NA	NA	NA	NA	NA	NA	NA	0.4	Deaths per 100,000 population	30.8273	29.5182	29.8909	29.4273	29.3364	29.5273	28.3273	28.3909	27.9909	27.2909	26.7364	27.1545	26.8273	27.6091	27.7545
77	PEV (Pre-Erythrocytic Vaccine)	3	0.35	10	0.1	Infants	6, 10, &, 14 weeks	None	0.700569	0.81	0.93	0.93	NA	NA	5-17mo	0 yrs	None	0.7	0.81	0.93	0.93	NA	NA	None	NA	NA	NA	NA	NA	NA	NA	NA	0.4	Cases in <5yo per 100,000 population	657.482	601.718	569.991	537.845	524.409	516.927	507.882	508.091	498.873	494.855	486.082	476.173	479.173	472.818	466.282
77	PEV (Pre-Erythrocytic Vaccine)	3	0.35	10	0.1	Infants	6, 10, &, 14 weeks	None	0.700569	0.81	0.93	0.93	NA	NA	5-17mo	0 yrs	None	0.7	0.81	0.93	0.93	NA	NA	None	NA	NA	NA	NA	NA	NA	NA	NA	0.4	Severe Cases in <5yo per 100,000 population	33.9364	30.1273	29.9727	27.7273	26.8818	27.1818	27.3455	26.5636	26.6273	26.9273	24.0909	25.6545	25.7455	24.4727	24.3727
77	PEV (Pre-Erythrocytic Vaccine)	3	0.35	10	0.1	Infants	6, 10, &, 14 weeks	None	0.700569	0.81	0.93	0.93	NA	NA	5-17mo	0 yrs	None	0.7	0.81	0.93	0.93	NA	NA	None	NA	NA	NA	NA	NA	NA	NA	NA	0.4	Deaths in < 5yo per 100,000 population	8.56364	7.15455	7.36364	7.06364	7.53636	7.48182	6.90909	6.78182	7.32727	6.84545	6.68182	6.57273	6.28182	6.81818	7.01818
77	PEV (Pre-Erythrocytic Vaccine)	3	0.35	10	0.1	Infants	6, 10, &, 14 weeks	None	0.700569	0.81	0.93	0.93	NA	NA	5-17mo	0 yrs	None	0.7	0.81	0.93	0.93	NA	NA	None	NA	NA	NA	NA	NA	NA	NA	NA	0.4	DALYs per 100,000 population	786.397	750.801	759.743	748.256	744.188	748.418	718.166	716.429	714.219	692.282	680.277	686.37	680.005	696.431	702.929
77	PEV (Pre-Erythrocytic Vaccine)	3	0.35	10	0.1	Infants	6, 10, &, 14 weeks	None	0.700569	0.81	0.93	0.93	NA	NA	5-17mo	0 yrs	None	0.7	0.81	0.93	0.93	NA	NA	None	NA	NA	NA	NA	NA	NA	NA	NA	0.4	Income and productivity gains from delivering vaccine (US$ / dose)	0.00110054	0.0338406	0.0435033	0.0646196	0.0857634	0.110124	0.131165	0.145898	0.178402	0.208436	0.252923	0.259659	0.267763	0.288247	0.303103
78	PEV (Pre-Erythrocytic Vaccine)	3	0.35	10	0.1	Infants	6, 10, &, 14 weeks	None	0.700569	0.81	0.93	0.93	NA	NA	5-17mo	0 yrs	None	0.5	0.69	0.85	0.85	NA	NA	None	NA	NA	NA	NA	NA	NA	NA	NA	0.4	Cases per 100,000 population	8574.84	8455.26	8477.78	8314.15	8253.35	8209.57	8089.88	8006.64	7876.21	7831.3	7731.14	7628.23	7556.83	7479.09	7425.72
78	PEV (Pre-Erythrocytic Vaccine)	3	0.35	10	0.1	Infants	6, 10, &, 14 weeks	None	0.700569	0.81	0.93	0.93	NA	NA	5-17mo	0 yrs	None	0.5	0.69	0.85	0.85	NA	NA	None	NA	NA	NA	NA	NA	NA	NA	NA	0.4	Severe Cases per 100,000 population	150.027	144.891	144.464	143.536	139.664	138.509	133.845	134.027	132.718	131.645	131.636	130.436	129.591	126.891	129.673
78	PEV (Pre-Erythrocytic Vaccine)	3	0.35	10	0.1	Infants	6, 10, &, 14 weeks	None	0.700569	0.81	0.93	0.93	NA	NA	5-17mo	0 yrs	None	0.5	0.69	0.85	0.85	NA	NA	None	NA	NA	NA	NA	NA	NA	NA	NA	0.4	Deaths per 100,000 population	31.8091	30.5818	29.7545	29.9	30.0818	28.9636	28.4	28.1455	27.1727	27.5545	27.9	27.1091	28	27.2091	27.1
78	PEV (Pre-Erythrocytic Vaccine)	3	0.35	10	0.1	Infants	6, 10, &, 14 weeks	None	0.700569	0.81	0.93	0.93	NA	NA	5-17mo	0 yrs	None	0.5	0.69	0.85	0.85	NA	NA	None	NA	NA	NA	NA	NA	NA	NA	NA	0.4	Cases in <5yo per 100,000 population	666.282	608.236	581.873	536.627	525.027	522.255	512.745	501.182	498.282	492.7	485.5	479.673	484.236	474.291	468.636
78	PEV (Pre-Erythrocytic Vaccine)	3	0.35	10	0.1	Infants	6, 10, &, 14 weeks	None	0.700569	0.81	0.93	0.93	NA	NA	5-17mo	0 yrs	None	0.5	0.69	0.85	0.85	NA	NA	None	NA	NA	NA	NA	NA	NA	NA	NA	0.4	Severe Cases in <5yo per 100,000 population	33.8455	31.8818	30.3909	28.1273	26.4727	26.9273	26.4182	25.8636	25.6	26.1545	24.7273	25.4364	25.1455	24.2545	24.7455
78	PEV (Pre-Erythrocytic Vaccine)	3	0.35	10	0.1	Infants	6, 10, &, 14 weeks	None	0.700569	0.81	0.93	0.93	NA	NA	5-17mo	0 yrs	None	0.5	0.69	0.85	0.85	NA	NA	None	NA	NA	NA	NA	NA	NA	NA	NA	0.4	Deaths in < 5yo per 100,000 population	8.17273	7.97273	7.75455	7.89091	7.22727	6.81818	7.47273	7.2	6.70909	6.68182	6.91818	7.04545	7.13636	6.8	6.71818
78	PEV (Pre-Erythrocytic Vaccine)	3	0.35	10	0.1	Infants	6, 10, &, 14 weeks	None	0.700569	0.81	0.93	0.93	NA	NA	5-17mo	0 yrs	None	0.5	0.69	0.85	0.85	NA	NA	None	NA	NA	NA	NA	NA	NA	NA	NA	0.4	DALYs per 100,000 population	807.352	774.532	759.055	760.762	762.458	737.129	722.618	717.3	689.876	699.602	709.141	692.184	710.141	688.75	687.011
78	PEV (Pre-Erythrocytic Vaccine)	3	0.35	10	0.1	Infants	6, 10, &, 14 weeks	None	0.700569	0.81	0.93	0.93	NA	NA	5-17mo	0 yrs	None	0.5	0.69	0.85	0.85	NA	NA	None	NA	NA	NA	NA	NA	NA	NA	NA	0.4	Income and productivity gains from delivering vaccine (US$ / dose)	0.00277955	0.0326559	0.023375	0.0635399	0.0844982	0.0960651	0.128142	0.146722	0.181288	0.193769	0.220785	0.24962	0.271382	0.291534	0.303244
79	PEV (Pre-Erythrocytic Vaccine)	3	0.35	10	0.1	Infants	6, 10, &, 14 weeks	None	0.498525	0.69	0.85	0.85	NA	NA	5-17mo	0 yrs	None	0.89	0.95	0.97	0.97	NA	NA	None	NA	NA	NA	NA	NA	NA	NA	NA	0.4	Cases per 100,000 population	8564.96	8434.12	8370.24	8320.5	8279.88	8290.65	8177.64	8152.13	8024.66	7925.36	7893.42	7791.52	7717.79	7629.35	7625.91
79	PEV (Pre-Erythrocytic Vaccine)	3	0.35	10	0.1	Infants	6, 10, &, 14 weeks	None	0.498525	0.69	0.85	0.85	NA	NA	5-17mo	0 yrs	None	0.89	0.95	0.97	0.97	NA	NA	None	NA	NA	NA	NA	NA	NA	NA	NA	0.4	Severe Cases per 100,000 population	149.182	145.973	146.091	140.036	140.918	141.591	139.836	138.945	136.918	135.727	135.609	133.2	133.527	130.173	133.873
79	PEV (Pre-Erythrocytic Vaccine)	3	0.35	10	0.1	Infants	6, 10, &, 14 weeks	None	0.498525	0.69	0.85	0.85	NA	NA	5-17mo	0 yrs	None	0.89	0.95	0.97	0.97	NA	NA	None	NA	NA	NA	NA	NA	NA	NA	NA	0.4	Deaths per 100,000 population	30.2909	30.2545	29.3636	29.0909	28.9636	28.2364	28.9818	30.3545	27.7091	28.0455	28.0455	28.2455	28.2818	27.3455	28.8636
79	PEV (Pre-Erythrocytic Vaccine)	3	0.35	10	0.1	Infants	6, 10, &, 14 weeks	None	0.498525	0.69	0.85	0.85	NA	NA	5-17mo	0 yrs	None	0.89	0.95	0.97	0.97	NA	NA	None	NA	NA	NA	NA	NA	NA	NA	NA	0.4	Cases in <5yo per 100,000 population	657.227	608.264	575.9	551.209	558.664	554.755	552.427	545.218	539.364	533.791	527.927	518.936	512.009	508.645	511.209
79	PEV (Pre-Erythrocytic Vaccine)	3	0.35	10	0.1	Infants	6, 10, &, 14 weeks	None	0.498525	0.69	0.85	0.85	NA	NA	5-17mo	0 yrs	None	0.89	0.95	0.97	0.97	NA	NA	None	NA	NA	NA	NA	NA	NA	NA	NA	0.4	Severe Cases in <5yo per 100,000 population	33.6182	32.4182	30.1727	28.7818	28.8545	29.3636	29.1455	28.3273	29.1545	27.1727	28.3	28.0091	27.5455	26.5818	27.4
79	PEV (Pre-Erythrocytic Vaccine)	3	0.35	10	0.1	Infants	6, 10, &, 14 weeks	None	0.498525	0.69	0.85	0.85	NA	NA	5-17mo	0 yrs	None	0.89	0.95	0.97	0.97	NA	NA	None	NA	NA	NA	NA	NA	NA	NA	NA	0.4	Deaths in < 5yo per 100,000 population	8.37273	8.09091	7.4	7.68182	7.40909	7.52727	7.38182	8.10909	7.3	6.92727	6.95455	7.53636	7.67273	7.50909	7.28182
79	PEV (Pre-Erythrocytic Vaccine)	3	0.35	10	0.1	Infants	6, 10, &, 14 weeks	None	0.498525	0.69	0.85	0.85	NA	NA	5-17mo	0 yrs	None	0.89	0.95	0.97	0.97	NA	NA	None	NA	NA	NA	NA	NA	NA	NA	NA	0.4	DALYs per 100,000 population	774.505	765.811	747.457	739.994	735.994	718.996	737.244	770.227	704.125	711.617	711.414	715.242	720.638	692.041	732.608
79	PEV (Pre-Erythrocytic Vaccine)	3	0.35	10	0.1	Infants	6, 10, &, 14 weeks	None	0.498525	0.69	0.85	0.85	NA	NA	5-17mo	0 yrs	None	0.89	0.95	0.97	0.97	NA	NA	None	NA	NA	NA	NA	NA	NA	NA	NA	0.4	Income and productivity gains from delivering vaccine (US$ / dose)	0.00406432	0.0484539	0.0637561	0.0819771	0.099956	0.0943535	0.134019	0.139692	0.179278	0.213913	0.23059	0.265033	0.288843	0.318121	0.318515
80	PEV (Pre-Erythrocytic Vaccine)	3	0.35	10	0.1	Infants	6, 10, &, 14 weeks	None	0.498525	0.69	0.85	0.85	NA	NA	5-17mo	0 yrs	None	0.7	0.81	0.93	0.93	NA	NA	None	NA	NA	NA	NA	NA	NA	NA	NA	0.4	Cases per 100,000 population	8626.95	8476.39	8412.45	8294.34	8328.12	8289.62	8258.25	8152.74	8031.14	7960.24	7920.83	7853.52	7832.95	7809.48	7742.3
80	PEV (Pre-Erythrocytic Vaccine)	3	0.35	10	0.1	Infants	6, 10, &, 14 weeks	None	0.498525	0.69	0.85	0.85	NA	NA	5-17mo	0 yrs	None	0.7	0.81	0.93	0.93	NA	NA	None	NA	NA	NA	NA	NA	NA	NA	NA	0.4	Severe Cases per 100,000 population	151.482	143.973	144.245	141.645	143.055	140.473	139.9	139.6	137.573	135.345	134.536	135.7	134.827	134.936	135.709
80	PEV (Pre-Erythrocytic Vaccine)	3	0.35	10	0.1	Infants	6, 10, &, 14 weeks	None	0.498525	0.69	0.85	0.85	NA	NA	5-17mo	0 yrs	None	0.7	0.81	0.93	0.93	NA	NA	None	NA	NA	NA	NA	NA	NA	NA	NA	0.4	Deaths per 100,000 population	31.2091	30.3909	30.3545	29.3091	30.8	29.4455	29.1273	28.6273	28.3909	28.7182	28.8545	28.2	28.1636	28.1545	29
80	PEV (Pre-Erythrocytic Vaccine)	3	0.35	10	0.1	Infants	6, 10, &, 14 weeks	None	0.498525	0.69	0.85	0.85	NA	NA	5-17mo	0 yrs	None	0.7	0.81	0.93	0.93	NA	NA	None	NA	NA	NA	NA	NA	NA	NA	NA	0.4	Cases in <5yo per 100,000 population	662.355	611.636	593.155	549.527	554.4	554.136	562.545	549.127	538.845	536.227	534.2	531.573	526.545	523.109	517.027
80	PEV (Pre-Erythrocytic Vaccine)	3	0.35	10	0.1	Infants	6, 10, &, 14 weeks	None	0.498525	0.69	0.85	0.85	NA	NA	5-17mo	0 yrs	None	0.7	0.81	0.93	0.93	NA	NA	None	NA	NA	NA	NA	NA	NA	NA	NA	0.4	Severe Cases in <5yo per 100,000 population	34.8182	31.3	30.1818	28.8182	29.1909	28.2545	29.0909	28.8818	28.7273	27.7	27.2545	27.6	27.3273	27.9273	27.1091
80	PEV (Pre-Erythrocytic Vaccine)	3	0.35	10	0.1	Infants	6, 10, &, 14 weeks	None	0.498525	0.69	0.85	0.85	NA	NA	5-17mo	0 yrs	None	0.7	0.81	0.93	0.93	NA	NA	None	NA	NA	NA	NA	NA	NA	NA	NA	0.4	Deaths in < 5yo per 100,000 population	8.49091	7.70909	7.71818	7.33636	7.68182	7.06364	7.71818	7.28182	7.48182	7.63636	7.29091	6.99091	7.10909	7.02727	7.56364
80	PEV (Pre-Erythrocytic Vaccine)	3	0.35	10	0.1	Infants	6, 10, &, 14 weeks	None	0.498525	0.69	0.85	0.85	NA	NA	5-17mo	0 yrs	None	0.7	0.81	0.93	0.93	NA	NA	None	NA	NA	NA	NA	NA	NA	NA	NA	0.4	DALYs per 100,000 population	794.952	772.834	774.653	745.878	780.647	746.894	742.872	728.248	723.661	730.101	731.299	718.236	711.617	717.763	735.784
80	PEV (Pre-Erythrocytic Vaccine)	3	0.35	10	0.1	Infants	6, 10, &, 14 weeks	None	0.498525	0.69	0.85	0.85	NA	NA	5-17mo	0 yrs	None	0.7	0.81	0.93	0.93	NA	NA	None	NA	NA	NA	NA	NA	NA	NA	NA	0.4	Income and productivity gains from delivering vaccine (US$ / dose)	-0.00996686	0.0370187	0.0553544	0.0926505	0.0809363	0.0955741	0.107586	0.13867	0.178037	0.206079	0.218488	0.243909	0.251792	0.255201	0.277071
81	PEV (Pre-Erythrocytic Vaccine)	3	0.35	10	0.1	Infants	6, 10, &, 14 weeks	None	0.498525	0.69	0.85	0.85	NA	NA	5-17mo	0 yrs	None	0.5	0.69	0.85	0.85	NA	NA	None	NA	NA	NA	NA	NA	NA	NA	NA	0.4	Cases per 100,000 population	8606.2	8498.62	8429.78	8365.63	8307.07	8299.13	8213.2	8097.88	8085.21	8001.99	7967.34	7925.91	7799.44	7747.8	7730.69
81	PEV (Pre-Erythrocytic Vaccine)	3	0.35	10	0.1	Infants	6, 10, &, 14 weeks	None	0.498525	0.69	0.85	0.85	NA	NA	5-17mo	0 yrs	None	0.5	0.69	0.85	0.85	NA	NA	None	NA	NA	NA	NA	NA	NA	NA	NA	0.4	Severe Cases per 100,000 population	148.855	145.673	145.018	142.045	140.318	140.8	139.973	136.818	137.382	136.618	138.6	136.218	133.436	132.364	133.373
81	PEV (Pre-Erythrocytic Vaccine)	3	0.35	10	0.1	Infants	6, 10, &, 14 weeks	None	0.498525	0.69	0.85	0.85	NA	NA	5-17mo	0 yrs	None	0.5	0.69	0.85	0.85	NA	NA	None	NA	NA	NA	NA	NA	NA	NA	NA	0.4	Deaths per 100,000 population	30.9182	30.4182	29.5273	29.4727	29.1091	29.1364	30.4455	28.5364	28.9818	29.3818	28.9364	28.8364	27.9364	27.5727	28.7818
81	PEV (Pre-Erythrocytic Vaccine)	3	0.35	10	0.1	Infants	6, 10, &, 14 weeks	None	0.498525	0.69	0.85	0.85	NA	NA	5-17mo	0 yrs	None	0.5	0.69	0.85	0.85	NA	NA	None	NA	NA	NA	NA	NA	NA	NA	NA	0.4	Cases in <5yo per 100,000 population	669.345	624.5	593.373	559.936	559.3	561.273	555.291	540.145	538.155	542.536	537.018	542.573	525.564	517.836	521.9
81	PEV (Pre-Erythrocytic Vaccine)	3	0.35	10	0.1	Infants	6, 10, &, 14 weeks	None	0.498525	0.69	0.85	0.85	NA	NA	5-17mo	0 yrs	None	0.5	0.69	0.85	0.85	NA	NA	None	NA	NA	NA	NA	NA	NA	NA	NA	0.4	Severe Cases in <5yo per 100,000 population	33.7	30.9091	31.4091	28.8182	28.7091	29.7545	28.5909	27.7364	28.2273	28.1455	28.6364	28.6364	27.4182	27.3909	26.8182
81	PEV (Pre-Erythrocytic Vaccine)	3	0.35	10	0.1	Infants	6, 10, &, 14 weeks	None	0.498525	0.69	0.85	0.85	NA	NA	5-17mo	0 yrs	None	0.5	0.69	0.85	0.85	NA	NA	None	NA	NA	NA	NA	NA	NA	NA	NA	0.4	Deaths in < 5yo per 100,000 population	8.35455	7.76364	7.72727	6.96364	7.57273	7.36364	8.14545	6.97273	7.59091	7.44545	7.3	7.70909	6.96364	7.04545	7.62727
81	PEV (Pre-Erythrocytic Vaccine)	3	0.35	10	0.1	Infants	6, 10, &, 14 weeks	None	0.498525	0.69	0.85	0.85	NA	NA	5-17mo	0 yrs	None	0.5	0.69	0.85	0.85	NA	NA	None	NA	NA	NA	NA	NA	NA	NA	NA	0.4	DALYs per 100,000 population	783.439	771.326	753.813	749.492	741.574	742.879	771.965	730.299	735.876	744.635	733.043	734.213	707.139	701.022	732.535
81	PEV (Pre-Erythrocytic Vaccine)	3	0.35	10	0.1	Infants	6, 10, &, 14 weeks	None	0.498525	0.69	0.85	0.85	NA	NA	5-17mo	0 yrs	None	0.5	0.69	0.85	0.85	NA	NA	None	NA	NA	NA	NA	NA	NA	NA	NA	0.4	Income and productivity gains from delivering vaccine (US$ / dose)	-0.00335464	0.0278043	0.0500331	0.0671954	0.0913179	0.092923	0.124492	0.158834	0.16181	0.191946	0.201935	0.22044	0.266293	0.279762	0.286668
82	PEV (Pre-Erythrocytic Vaccine)	3	0.35	10	1	Infants	6, 10, &, 14 weeks	None	0.893855	0.95	0.97	0.97	NA	NA	5-17mo	0 yrs	None	0.89	0.95	0.97	0.97	NA	NA	None	NA	NA	NA	NA	NA	NA	NA	NA	0.4	Cases per 100,000 population	85818.9	85100.7	84368.3	83465.2	82908.6	81824.1	79509.1	78666.3	78043.9	76578.5	76208.1	74531.5	73668.1	72909.5	72136.3
82	PEV (Pre-Erythrocytic Vaccine)	3	0.35	10	1	Infants	6, 10, &, 14 weeks	None	0.893855	0.95	0.97	0.97	NA	NA	5-17mo	0 yrs	None	0.89	0.95	0.97	0.97	NA	NA	None	NA	NA	NA	NA	NA	NA	NA	NA	0.4	Severe Cases per 100,000 population	1489.82	1445.82	1434.64	1408.45	1395.27	1368.55	1317.64	1317.82	1300.73	1266.36	1281.55	1272	1249.45	1231.09	1236.64
82	PEV (Pre-Erythrocytic Vaccine)	3	0.35	10	1	Infants	6, 10, &, 14 weeks	None	0.893855	0.95	0.97	0.97	NA	NA	5-17mo	0 yrs	None	0.89	0.95	0.97	0.97	NA	NA	None	NA	NA	NA	NA	NA	NA	NA	NA	0.4	Deaths per 100,000 population	308.455	299.364	296.727	299	294.636	293.455	284.091	279.636	270.818	277.636	272.545	271	277.182	259.273	265
82	PEV (Pre-Erythrocytic Vaccine)	3	0.35	10	1	Infants	6, 10, &, 14 weeks	None	0.893855	0.95	0.97	0.97	NA	NA	5-17mo	0 yrs	None	0.89	0.95	0.97	0.97	NA	NA	None	NA	NA	NA	NA	NA	NA	NA	NA	0.4	Cases in <5yo per 100,000 population	6622.55	5994.64	5577.55	5097	5022	4835.91	4684.73	4603.36	4630.27	4502.27	4502.73	4463.73	4384.09	4301.55	4293.64
82	PEV (Pre-Erythrocytic Vaccine)	3	0.35	10	1	Infants	6, 10, &, 14 weeks	None	0.893855	0.95	0.97	0.97	NA	NA	5-17mo	0 yrs	None	0.89	0.95	0.97	0.97	NA	NA	None	NA	NA	NA	NA	NA	NA	NA	NA	0.4	Severe Cases in <5yo per 100,000 population	344.364	309.636	287.091	266.182	263.909	253.545	245.455	236.636	244	233.364	244.273	238.364	231.273	227.545	226.455
82	PEV (Pre-Erythrocytic Vaccine)	3	0.35	10	1	Infants	6, 10, &, 14 weeks	None	0.893855	0.95	0.97	0.97	NA	NA	5-17mo	0 yrs	None	0.89	0.95	0.97	0.97	NA	NA	None	NA	NA	NA	NA	NA	NA	NA	NA	0.4	Deaths in < 5yo per 100,000 population	80.4545	76	71	67.1818	70.2727	71.2727	67.5455	68.3636	67.1818	68.4545	67.5455	66.4545	67	67.6364	66
82	PEV (Pre-Erythrocytic Vaccine)	3	0.35	10	1	Infants	6, 10, &, 14 weeks	None	0.893855	0.95	0.97	0.97	NA	NA	5-17mo	0 yrs	None	0.89	0.95	0.97	0.97	NA	NA	None	NA	NA	NA	NA	NA	NA	NA	NA	0.4	DALYs per 100,000 population	7866.35	7599.54	7538.33	7616.22	7486.95	7445.81	7189.16	7110.83	6880.14	7025.45	6911.65	6846.74	6976.63	6548.01	6693.39
82	PEV (Pre-Erythrocytic Vaccine)	3	0.35	10	1	Infants	6, 10, &, 14 weeks	None	0.893855	0.95	0.97	0.97	NA	NA	5-17mo	0 yrs	None	0.89	0.95	0.97	0.97	NA	NA	None	NA	NA	NA	NA	NA	NA	NA	NA	0.4	Income and productivity gains from delivering vaccine (US$ / dose)	0.00555737	0.145149	0.265856	0.432892	0.572497	0.813384	1.33286	1.48405	1.62175	1.96373	2.04345	2.43233	2.63995	2.7953	2.97501
83	PEV (Pre-Erythrocytic Vaccine)	3	0.35	10	1	Infants	6, 10, &, 14 weeks	None	0.893855	0.95	0.97	0.97	NA	NA	5-17mo	0 yrs	None	0.7	0.81	0.93	0.93	NA	NA	None	NA	NA	NA	NA	NA	NA	NA	NA	0.4	Cases per 100,000 population	85983.5	85224.4	84185.3	83378.2	82732.6	82054.9	80634.5	79450.6	77565	77075.8	75541.2	74607.8	73260.1	72978.5	72322.9
83	PEV (Pre-Erythrocytic Vaccine)	3	0.35	10	1	Infants	6, 10, &, 14 weeks	None	0.893855	0.95	0.97	0.97	NA	NA	5-17mo	0 yrs	None	0.7	0.81	0.93	0.93	NA	NA	None	NA	NA	NA	NA	NA	NA	NA	NA	0.4	Severe Cases per 100,000 population	1497	1468.82	1408.64	1398	1402.45	1357.91	1341.64	1329.73	1272.36	1281.36	1277.82	1257.64	1248.91	1240.45	1229.18
83	PEV (Pre-Erythrocytic Vaccine)	3	0.35	10	1	Infants	6, 10, &, 14 weeks	None	0.893855	0.95	0.97	0.97	NA	NA	5-17mo	0 yrs	None	0.7	0.81	0.93	0.93	NA	NA	None	NA	NA	NA	NA	NA	NA	NA	NA	0.4	Deaths per 100,000 population	310.364	319.909	293.727	286.273	302.636	282.818	285.182	280.545	277.818	277.364	275	266.818	262.727	263	265.182
83	PEV (Pre-Erythrocytic Vaccine)	3	0.35	10	1	Infants	6, 10, &, 14 weeks	None	0.893855	0.95	0.97	0.97	NA	NA	5-17mo	0 yrs	None	0.7	0.81	0.93	0.93	NA	NA	None	NA	NA	NA	NA	NA	NA	NA	NA	0.4	Cases in <5yo per 100,000 population	6640.36	6044.09	5547.91	5106.64	4977.91	4850.18	4726.55	4718.55	4609.36	4571.09	4420.45	4436.18	4361	4281.82	4300.73
83	PEV (Pre-Erythrocytic Vaccine)	3	0.35	10	1	Infants	6, 10, &, 14 weeks	None	0.893855	0.95	0.97	0.97	NA	NA	5-17mo	0 yrs	None	0.7	0.81	0.93	0.93	NA	NA	None	NA	NA	NA	NA	NA	NA	NA	NA	0.4	Severe Cases in <5yo per 100,000 population	334	307.545	284.727	262.091	262.455	252.636	256.364	245.818	239	245.364	235.364	239.818	236.273	226.909	221.273
83	PEV (Pre-Erythrocytic Vaccine)	3	0.35	10	1	Infants	6, 10, &, 14 weeks	None	0.893855	0.95	0.97	0.97	NA	NA	5-17mo	0 yrs	None	0.7	0.81	0.93	0.93	NA	NA	None	NA	NA	NA	NA	NA	NA	NA	NA	0.4	Deaths in < 5yo per 100,000 population	81.5455	81.4545	76.9091	69.3636	75.3636	67.7273	69.3636	68.0909	70.0909	66.7273	66.2727	66.6364	66.0909	66.8182	62.9091
83	PEV (Pre-Erythrocytic Vaccine)	3	0.35	10	1	Infants	6, 10, &, 14 weeks	None	0.893855	0.95	0.97	0.97	NA	NA	5-17mo	0 yrs	None	0.7	0.81	0.93	0.93	NA	NA	None	NA	NA	NA	NA	NA	NA	NA	NA	0.4	DALYs per 100,000 population	7911.24	8111.37	7490.85	7313.46	7677.09	7191.6	7230.35	7128.23	7074.27	7023.82	6961.45	6774.94	6645.89	6657.79	6715.08
83	PEV (Pre-Erythrocytic Vaccine)	3	0.35	10	1	Infants	6, 10, &, 14 weeks	None	0.893855	0.95	0.97	0.97	NA	NA	5-17mo	0 yrs	None	0.7	0.81	0.93	0.93	NA	NA	None	NA	NA	NA	NA	NA	NA	NA	NA	0.4	Income and productivity gains from delivering vaccine (US$ / dose)	-0.0175711	0.115095	0.333537	0.467772	0.607255	0.757887	1.0655	1.33221	1.74119	1.85796	2.1926	2.42001	2.72433	2.77787	2.94102
84	PEV (Pre-Erythrocytic Vaccine)	3	0.35	10	1	Infants	6, 10, &, 14 weeks	None	0.893855	0.95	0.97	0.97	NA	NA	5-17mo	0 yrs	None	0.5	0.69	0.85	0.85	NA	NA	None	NA	NA	NA	NA	NA	NA	NA	NA	0.4	Cases per 100,000 population	86092.3	85203	84487.3	84215.8	83132.8	81701.5	80324.3	79105.9	77169.5	76367.8	75273.2	74382.8	73464.6	72712.7	72395
84	PEV (Pre-Erythrocytic Vaccine)	3	0.35	10	1	Infants	6, 10, &, 14 weeks	None	0.893855	0.95	0.97	0.97	NA	NA	5-17mo	0 yrs	None	0.5	0.69	0.85	0.85	NA	NA	None	NA	NA	NA	NA	NA	NA	NA	NA	0.4	Severe Cases per 100,000 population	1491.36	1470	1448.55	1431.36	1395.91	1363.91	1337.73	1315.73	1282.91	1261.09	1267.45	1259.55	1239.64	1229.73	1241.27
84	PEV (Pre-Erythrocytic Vaccine)	3	0.35	10	1	Infants	6, 10, &, 14 weeks	None	0.893855	0.95	0.97	0.97	NA	NA	5-17mo	0 yrs	None	0.5	0.69	0.85	0.85	NA	NA	None	NA	NA	NA	NA	NA	NA	NA	NA	0.4	Deaths per 100,000 population	312.545	310.091	292.909	293.727	292.273	289.273	274.455	277.273	271.727	266.273	277	270.182	264.818	260.455	262.182
84	PEV (Pre-Erythrocytic Vaccine)	3	0.35	10	1	Infants	6, 10, &, 14 weeks	None	0.893855	0.95	0.97	0.97	NA	NA	5-17mo	0 yrs	None	0.5	0.69	0.85	0.85	NA	NA	None	NA	NA	NA	NA	NA	NA	NA	NA	0.4	Cases in <5yo per 100,000 population	6603.09	6111.91	5662.73	5259.73	5053.27	4892.36	4747.64	4706	4527.45	4485.82	4481.27	4406.45	4331.91	4252.91	4292.36
84	PEV (Pre-Erythrocytic Vaccine)	3	0.35	10	1	Infants	6, 10, &, 14 weeks	None	0.893855	0.95	0.97	0.97	NA	NA	5-17mo	0 yrs	None	0.5	0.69	0.85	0.85	NA	NA	None	NA	NA	NA	NA	NA	NA	NA	NA	0.4	Severe Cases in <5yo per 100,000 population	344.455	308	297.182	269.273	264.636	257.727	243.636	240.909	234	236.909	232	236.364	225.818	224.182	221.545
84	PEV (Pre-Erythrocytic Vaccine)	3	0.35	10	1	Infants	6, 10, &, 14 weeks	None	0.893855	0.95	0.97	0.97	NA	NA	5-17mo	0 yrs	None	0.5	0.69	0.85	0.85	NA	NA	None	NA	NA	NA	NA	NA	NA	NA	NA	0.4	Deaths in < 5yo per 100,000 population	82.5455	76.7273	68.7273	71.6364	66.6364	72.2727	63.6364	67.4545	66.1818	62.9091	66.0909	67.8182	66.6364	63.5455	61.5455
84	PEV (Pre-Erythrocytic Vaccine)	3	0.35	10	1	Infants	6, 10, &, 14 weeks	None	0.893855	0.95	0.97	0.97	NA	NA	5-17mo	0 yrs	None	0.5	0.69	0.85	0.85	NA	NA	None	NA	NA	NA	NA	NA	NA	NA	NA	0.4	DALYs per 100,000 population	7944.86	7877.33	7440.56	7457.61	7405.86	7359.06	6940.61	7056.52	6886.87	6737.57	7016.61	6835.05	6691.13	6572.57	6623.06
84	PEV (Pre-Erythrocytic Vaccine)	3	0.35	10	1	Infants	6, 10, &, 14 weeks	None	0.893855	0.95	0.97	0.97	NA	NA	5-17mo	0 yrs	None	0.5	0.69	0.85	0.85	NA	NA	None	NA	NA	NA	NA	NA	NA	NA	NA	0.4	Income and productivity gains from delivering vaccine (US$ / dose)	-0.0360719	0.123331	0.239667	0.273796	0.516152	0.832491	1.13126	1.41502	1.82152	2.01779	2.2768	2.4649	2.67885	2.84345	2.92615
85	PEV (Pre-Erythrocytic Vaccine)	3	0.35	10	1	Infants	6, 10, &, 14 weeks	None	0.700569	0.81	0.93	0.93	NA	NA	5-17mo	0 yrs	None	0.89	0.95	0.97	0.97	NA	NA	None	NA	NA	NA	NA	NA	NA	NA	NA	0.4	Cases per 100,000 population	85980	84932.3	84145.8	83009.2	82587.2	81699.3	80882.9	79879.8	79185.5	77998.7	77659.7	76507.5	75290.9	74545.1	74010
85	PEV (Pre-Erythrocytic Vaccine)	3	0.35	10	1	Infants	6, 10, &, 14 weeks	None	0.700569	0.81	0.93	0.93	NA	NA	5-17mo	0 yrs	None	0.89	0.95	0.97	0.97	NA	NA	None	NA	NA	NA	NA	NA	NA	NA	NA	0.4	Severe Cases per 100,000 population	1477.45	1448.18	1422.09	1389.09	1404.27	1378.18	1374.18	1336.82	1346.73	1329.27	1327.27	1300.27	1270.27	1293.18	1283.27
85	PEV (Pre-Erythrocytic Vaccine)	3	0.35	10	1	Infants	6, 10, &, 14 weeks	None	0.700569	0.81	0.93	0.93	NA	NA	5-17mo	0 yrs	None	0.89	0.95	0.97	0.97	NA	NA	None	NA	NA	NA	NA	NA	NA	NA	NA	0.4	Deaths per 100,000 population	307	295.273	294.909	294.364	305.818	295.455	285.273	281	274.455	277.091	282.727	275	275.182	272.909	279.545
85	PEV (Pre-Erythrocytic Vaccine)	3	0.35	10	1	Infants	6, 10, &, 14 weeks	None	0.700569	0.81	0.93	0.93	NA	NA	5-17mo	0 yrs	None	0.89	0.95	0.97	0.97	NA	NA	None	NA	NA	NA	NA	NA	NA	NA	NA	0.4	Cases in <5yo per 100,000 population	6612.64	6053.55	5581.36	5275.73	5261.55	5108.55	5095.73	5043.82	5024	4939.82	4931.73	4855.45	4741.55	4666.82	4631.09
85	PEV (Pre-Erythrocytic Vaccine)	3	0.35	10	1	Infants	6, 10, &, 14 weeks	None	0.700569	0.81	0.93	0.93	NA	NA	5-17mo	0 yrs	None	0.89	0.95	0.97	0.97	NA	NA	None	NA	NA	NA	NA	NA	NA	NA	NA	0.4	Severe Cases in <5yo per 100,000 population	334.091	313.727	296.182	271.545	276.727	265.091	277.273	262.727	264.545	265.455	256.091	243.545	250	252.455	250.455
85	PEV (Pre-Erythrocytic Vaccine)	3	0.35	10	1	Infants	6, 10, &, 14 weeks	None	0.700569	0.81	0.93	0.93	NA	NA	5-17mo	0 yrs	None	0.89	0.95	0.97	0.97	NA	NA	None	NA	NA	NA	NA	NA	NA	NA	NA	0.4	Deaths in < 5yo per 100,000 population	80.0909	76	78.6364	74.3636	78.1818	69.3636	74.2727	69.4545	69.0909	70.8182	72.1818	65.1818	65.4545	69.5455	70.8182
85	PEV (Pre-Erythrocytic Vaccine)	3	0.35	10	1	Infants	6, 10, &, 14 weeks	None	0.700569	0.81	0.93	0.93	NA	NA	5-17mo	0 yrs	None	0.89	0.95	0.97	0.97	NA	NA	None	NA	NA	NA	NA	NA	NA	NA	NA	0.4	DALYs per 100,000 population	7830	7545.69	7527.52	7479.26	7727.66	7506.69	7274.8	7150.65	6961.07	7039.4	7144.21	6984.76	6952.08	6889.13	7048.58
85	PEV (Pre-Erythrocytic Vaccine)	3	0.35	10	1	Infants	6, 10, &, 14 weeks	None	0.700569	0.81	0.93	0.93	NA	NA	5-17mo	0 yrs	None	0.89	0.95	0.97	0.97	NA	NA	None	NA	NA	NA	NA	NA	NA	NA	NA	0.4	Income and productivity gains from delivering vaccine (US$ / dose)	-0.0129865	0.228344	0.396241	0.701004	0.816593	1.06244	1.25482	1.51661	1.6917	2.03085	2.12513	2.44675	2.80653	2.96109	3.12914
86	PEV (Pre-Erythrocytic Vaccine)	3	0.35	10	1	Infants	6, 10, &, 14 weeks	None	0.700569	0.81	0.93	0.93	NA	NA	5-17mo	0 yrs	None	0.7	0.81	0.93	0.93	NA	NA	None	NA	NA	NA	NA	NA	NA	NA	NA	0.4	Cases per 100,000 population	85780.5	84566.5	84044.9	83214.3	82470.4	81464.7	80705.5	80137.7	78818.5	77771.4	76299.5	75935	75609.6	74864.9	74372.6
86	PEV (Pre-Erythrocytic Vaccine)	3	0.35	10	1	Infants	6, 10, &, 14 weeks	None	0.700569	0.81	0.93	0.93	NA	NA	5-17mo	0 yrs	None	0.7	0.81	0.93	0.93	NA	NA	None	NA	NA	NA	NA	NA	NA	NA	NA	0.4	Severe Cases per 100,000 population	1488.55	1435.18	1430.73	1408.45	1387.73	1388.09	1373.73	1348	1339.73	1327.27	1268.55	1300.18	1305.82	1287.82	1284.91
86	PEV (Pre-Erythrocytic Vaccine)	3	0.35	10	1	Infants	6, 10, &, 14 weeks	None	0.700569	0.81	0.93	0.93	NA	NA	5-17mo	0 yrs	None	0.7	0.81	0.93	0.93	NA	NA	None	NA	NA	NA	NA	NA	NA	NA	NA	0.4	Deaths per 100,000 population	308.273	295.182	298.909	294.273	293.364	295.273	283.273	283.909	279.909	272.909	267.364	271.545	268.273	276.091	277.545
86	PEV (Pre-Erythrocytic Vaccine)	3	0.35	10	1	Infants	6, 10, &, 14 weeks	None	0.700569	0.81	0.93	0.93	NA	NA	5-17mo	0 yrs	None	0.7	0.81	0.93	0.93	NA	NA	None	NA	NA	NA	NA	NA	NA	NA	NA	0.4	Cases in <5yo per 100,000 population	6574.82	6017.18	5699.91	5378.45	5244.09	5169.27	5078.82	5080.91	4988.73	4948.55	4860.82	4761.73	4791.73	4728.18	4662.82
86	PEV (Pre-Erythrocytic Vaccine)	3	0.35	10	1	Infants	6, 10, &, 14 weeks	None	0.700569	0.81	0.93	0.93	NA	NA	5-17mo	0 yrs	None	0.7	0.81	0.93	0.93	NA	NA	None	NA	NA	NA	NA	NA	NA	NA	NA	0.4	Severe Cases in <5yo per 100,000 population	339.364	301.273	299.727	277.273	268.818	271.818	273.455	265.636	266.273	269.273	240.909	256.545	257.455	244.727	243.727
86	PEV (Pre-Erythrocytic Vaccine)	3	0.35	10	1	Infants	6, 10, &, 14 weeks	None	0.700569	0.81	0.93	0.93	NA	NA	5-17mo	0 yrs	None	0.7	0.81	0.93	0.93	NA	NA	None	NA	NA	NA	NA	NA	NA	NA	NA	0.4	Deaths in < 5yo per 100,000 population	85.6364	71.5455	73.6364	70.6364	75.3636	74.8182	69.0909	67.8182	73.2727	68.4545	66.8182	65.7273	62.8182	68.1818	70.1818
86	PEV (Pre-Erythrocytic Vaccine)	3	0.35	10	1	Infants	6, 10, &, 14 weeks	None	0.700569	0.81	0.93	0.93	NA	NA	5-17mo	0 yrs	None	0.7	0.81	0.93	0.93	NA	NA	None	NA	NA	NA	NA	NA	NA	NA	NA	0.4	DALYs per 100,000 population	7863.97	7508.01	7597.43	7482.56	7441.88	7484.18	7181.66	7164.29	7142.19	6922.82	6802.77	6863.7	6800.05	6964.31	7029.29
86	PEV (Pre-Erythrocytic Vaccine)	3	0.35	10	1	Infants	6, 10, &, 14 weeks	None	0.700569	0.81	0.93	0.93	NA	NA	5-17mo	0 yrs	None	0.7	0.81	0.93	0.93	NA	NA	None	NA	NA	NA	NA	NA	NA	NA	NA	0.4	Income and productivity gains from delivering vaccine (US$ / dose)	0.0110054	0.338406	0.435033	0.646196	0.857634	1.10124	1.31165	1.45898	1.78402	2.08436	2.52923	2.59659	2.67763	2.88247	3.03103
87	PEV (Pre-Erythrocytic Vaccine)	3	0.35	10	1	Infants	6, 10, &, 14 weeks	None	0.700569	0.81	0.93	0.93	NA	NA	5-17mo	0 yrs	None	0.5	0.69	0.85	0.85	NA	NA	None	NA	NA	NA	NA	NA	NA	NA	NA	0.4	Cases per 100,000 population	85748.4	84552.6	84777.8	83141.5	82533.5	82095.7	80898.8	80066.4	78762.1	78313	77311.4	76282.3	75568.3	74790.9	74257.2
87	PEV (Pre-Erythrocytic Vaccine)	3	0.35	10	1	Infants	6, 10, &, 14 weeks	None	0.700569	0.81	0.93	0.93	NA	NA	5-17mo	0 yrs	None	0.5	0.69	0.85	0.85	NA	NA	None	NA	NA	NA	NA	NA	NA	NA	NA	0.4	Severe Cases per 100,000 population	1500.27	1448.91	1444.64	1435.36	1396.64	1385.09	1338.45	1340.27	1327.18	1316.45	1316.36	1304.36	1295.91	1268.91	1296.73
87	PEV (Pre-Erythrocytic Vaccine)	3	0.35	10	1	Infants	6, 10, &, 14 weeks	None	0.700569	0.81	0.93	0.93	NA	NA	5-17mo	0 yrs	None	0.5	0.69	0.85	0.85	NA	NA	None	NA	NA	NA	NA	NA	NA	NA	NA	0.4	Deaths per 100,000 population	318.091	305.818	297.545	299	300.818	289.636	284	281.455	271.727	275.545	279	271.091	280	272.091	271
87	PEV (Pre-Erythrocytic Vaccine)	3	0.35	10	1	Infants	6, 10, &, 14 weeks	None	0.700569	0.81	0.93	0.93	NA	NA	5-17mo	0 yrs	None	0.5	0.69	0.85	0.85	NA	NA	None	NA	NA	NA	NA	NA	NA	NA	NA	0.4	Cases in <5yo per 100,000 population	6662.82	6082.36	5818.73	5366.27	5250.27	5222.55	5127.45	5011.82	4982.82	4927	4855	4796.73	4842.36	4742.91	4686.36
87	PEV (Pre-Erythrocytic Vaccine)	3	0.35	10	1	Infants	6, 10, &, 14 weeks	None	0.700569	0.81	0.93	0.93	NA	NA	5-17mo	0 yrs	None	0.5	0.69	0.85	0.85	NA	NA	None	NA	NA	NA	NA	NA	NA	NA	NA	0.4	Severe Cases in <5yo per 100,000 population	338.455	318.818	303.909	281.273	264.727	269.273	264.182	258.636	256	261.545	247.273	254.364	251.455	242.545	247.455
87	PEV (Pre-Erythrocytic Vaccine)	3	0.35	10	1	Infants	6, 10, &, 14 weeks	None	0.700569	0.81	0.93	0.93	NA	NA	5-17mo	0 yrs	None	0.5	0.69	0.85	0.85	NA	NA	None	NA	NA	NA	NA	NA	NA	NA	NA	0.4	Deaths in < 5yo per 100,000 population	81.7273	79.7273	77.5455	78.9091	72.2727	68.1818	74.7273	72	67.0909	66.8182	69.1818	70.4545	71.3636	68	67.1818
87	PEV (Pre-Erythrocytic Vaccine)	3	0.35	10	1	Infants	6, 10, &, 14 weeks	None	0.700569	0.81	0.93	0.93	NA	NA	5-17mo	0 yrs	None	0.5	0.69	0.85	0.85	NA	NA	None	NA	NA	NA	NA	NA	NA	NA	NA	0.4	DALYs per 100,000 population	8073.52	7745.32	7590.55	7607.62	7624.58	7371.29	7226.18	7173	6898.76	6996.02	7091.41	6921.84	7101.41	6887.5	6870.11
87	PEV (Pre-Erythrocytic Vaccine)	3	0.35	10	1	Infants	6, 10, &, 14 weeks	None	0.700569	0.81	0.93	0.93	NA	NA	5-17mo	0 yrs	None	0.5	0.69	0.85	0.85	NA	NA	None	NA	NA	NA	NA	NA	NA	NA	NA	0.4	Income and productivity gains from delivering vaccine (US$ / dose)	0.0277955	0.326559	0.23375	0.635399	0.844982	0.960651	1.28142	1.46722	1.81288	1.93769	2.20785	2.4962	2.71382	2.91534	3.03244
88	PEV (Pre-Erythrocytic Vaccine)	3	0.35	10	1	Infants	6, 10, &, 14 weeks	None	0.498525	0.69	0.85	0.85	NA	NA	5-17mo	0 yrs	None	0.89	0.95	0.97	0.97	NA	NA	None	NA	NA	NA	NA	NA	NA	NA	NA	0.4	Cases per 100,000 population	85649.6	84341.2	83702.4	83205	82798.8	82906.5	81776.4	81521.3	80246.6	79253.6	78934.2	77915.2	77177.9	76293.5	76259.1
88	PEV (Pre-Erythrocytic Vaccine)	3	0.35	10	1	Infants	6, 10, &, 14 weeks	None	0.498525	0.69	0.85	0.85	NA	NA	5-17mo	0 yrs	None	0.89	0.95	0.97	0.97	NA	NA	None	NA	NA	NA	NA	NA	NA	NA	NA	0.4	Severe Cases per 100,000 population	1491.82	1459.73	1460.91	1400.36	1409.18	1415.91	1398.36	1389.45	1369.18	1357.27	1356.09	1332	1335.27	1301.73	1338.73
88	PEV (Pre-Erythrocytic Vaccine)	3	0.35	10	1	Infants	6, 10, &, 14 weeks	None	0.498525	0.69	0.85	0.85	NA	NA	5-17mo	0 yrs	None	0.89	0.95	0.97	0.97	NA	NA	None	NA	NA	NA	NA	NA	NA	NA	NA	0.4	Deaths per 100,000 population	302.909	302.545	293.636	290.909	289.636	282.364	289.818	303.545	277.091	280.455	280.455	282.455	282.818	273.455	288.636
88	PEV (Pre-Erythrocytic Vaccine)	3	0.35	10	1	Infants	6, 10, &, 14 weeks	None	0.498525	0.69	0.85	0.85	NA	NA	5-17mo	0 yrs	None	0.89	0.95	0.97	0.97	NA	NA	None	NA	NA	NA	NA	NA	NA	NA	NA	0.4	Cases in <5yo per 100,000 population	6572.27	6082.64	5759	5512.09	5586.64	5547.55	5524.27	5452.18	5393.64	5337.91	5279.27	5189.36	5120.09	5086.45	5112.09
88	PEV (Pre-Erythrocytic Vaccine)	3	0.35	10	1	Infants	6, 10, &, 14 weeks	None	0.498525	0.69	0.85	0.85	NA	NA	5-17mo	0 yrs	None	0.89	0.95	0.97	0.97	NA	NA	None	NA	NA	NA	NA	NA	NA	NA	NA	0.4	Severe Cases in <5yo per 100,000 population	336.182	324.182	301.727	287.818	288.545	293.636	291.455	283.273	291.545	271.727	283	280.091	275.455	265.818	274
88	PEV (Pre-Erythrocytic Vaccine)	3	0.35	10	1	Infants	6, 10, &, 14 weeks	None	0.498525	0.69	0.85	0.85	NA	NA	5-17mo	0 yrs	None	0.89	0.95	0.97	0.97	NA	NA	None	NA	NA	NA	NA	NA	NA	NA	NA	0.4	Deaths in < 5yo per 100,000 population	83.7273	80.9091	74	76.8182	74.0909	75.2727	73.8182	81.0909	73	69.2727	69.5455	75.3636	76.7273	75.0909	72.8182
88	PEV (Pre-Erythrocytic Vaccine)	3	0.35	10	1	Infants	6, 10, &, 14 weeks	None	0.498525	0.69	0.85	0.85	NA	NA	5-17mo	0 yrs	None	0.89	0.95	0.97	0.97	NA	NA	None	NA	NA	NA	NA	NA	NA	NA	NA	0.4	DALYs per 100,000 population	7745.05	7658.11	7474.57	7399.94	7359.94	7189.96	7372.44	7702.27	7041.25	7116.17	7114.14	7152.42	7206.38	6920.41	7326.08
88	PEV (Pre-Erythrocytic Vaccine)	3	0.35	10	1	Infants	6, 10, &, 14 weeks	None	0.498525	0.69	0.85	0.85	NA	NA	5-17mo	0 yrs	None	0.89	0.95	0.97	0.97	NA	NA	None	NA	NA	NA	NA	NA	NA	NA	NA	0.4	Income and productivity gains from delivering vaccine (US$ / dose)	0.0406432	0.484539	0.637561	0.819771	0.99956	0.943535	1.34019	1.39692	1.79278	2.13913	2.3059	2.65033	2.88843	3.18121	3.18515
89	PEV (Pre-Erythrocytic Vaccine)	3	0.35	10	1	Infants	6, 10, &, 14 weeks	None	0.498525	0.69	0.85	0.85	NA	NA	5-17mo	0 yrs	None	0.7	0.81	0.93	0.93	NA	NA	None	NA	NA	NA	NA	NA	NA	NA	NA	0.4	Cases per 100,000 population	86269.5	84763.9	84124.5	82943.4	83281.2	82896.2	82582.5	81527.4	80311.4	79602.4	79208.3	78535.2	78329.5	78094.8	77423
89	PEV (Pre-Erythrocytic Vaccine)	3	0.35	10	1	Infants	6, 10, &, 14 weeks	None	0.498525	0.69	0.85	0.85	NA	NA	5-17mo	0 yrs	None	0.7	0.81	0.93	0.93	NA	NA	None	NA	NA	NA	NA	NA	NA	NA	NA	0.4	Severe Cases per 100,000 population	1514.82	1439.73	1442.45	1416.45	1430.55	1404.73	1399	1396	1375.73	1353.45	1345.36	1357	1348.27	1349.36	1357.09
89	PEV (Pre-Erythrocytic Vaccine)	3	0.35	10	1	Infants	6, 10, &, 14 weeks	None	0.498525	0.69	0.85	0.85	NA	NA	5-17mo	0 yrs	None	0.7	0.81	0.93	0.93	NA	NA	None	NA	NA	NA	NA	NA	NA	NA	NA	0.4	Deaths per 100,000 population	312.091	303.909	303.545	293.091	308	294.455	291.273	286.273	283.909	287.182	288.545	282	281.636	281.545	290
89	PEV (Pre-Erythrocytic Vaccine)	3	0.35	10	1	Infants	6, 10, &, 14 weeks	None	0.498525	0.69	0.85	0.85	NA	NA	5-17mo	0 yrs	None	0.7	0.81	0.93	0.93	NA	NA	None	NA	NA	NA	NA	NA	NA	NA	NA	0.4	Cases in <5yo per 100,000 population	6623.55	6116.36	5931.55	5495.27	5544	5541.36	5625.45	5491.27	5388.45	5362.27	5342	5315.73	5265.45	5231.09	5170.27
89	PEV (Pre-Erythrocytic Vaccine)	3	0.35	10	1	Infants	6, 10, &, 14 weeks	None	0.498525	0.69	0.85	0.85	NA	NA	5-17mo	0 yrs	None	0.7	0.81	0.93	0.93	NA	NA	None	NA	NA	NA	NA	NA	NA	NA	NA	0.4	Severe Cases in <5yo per 100,000 population	348.182	313	301.818	288.182	291.909	282.545	290.909	288.818	287.273	277	272.545	276	273.273	279.273	271.091
89	PEV (Pre-Erythrocytic Vaccine)	3	0.35	10	1	Infants	6, 10, &, 14 weeks	None	0.498525	0.69	0.85	0.85	NA	NA	5-17mo	0 yrs	None	0.7	0.81	0.93	0.93	NA	NA	None	NA	NA	NA	NA	NA	NA	NA	NA	0.4	Deaths in < 5yo per 100,000 population	84.9091	77.0909	77.1818	73.3636	76.8182	70.6364	77.1818	72.8182	74.8182	76.3636	72.9091	69.9091	71.0909	70.2727	75.6364
89	PEV (Pre-Erythrocytic Vaccine)	3	0.35	10	1	Infants	6, 10, &, 14 weeks	None	0.498525	0.69	0.85	0.85	NA	NA	5-17mo	0 yrs	None	0.7	0.81	0.93	0.93	NA	NA	None	NA	NA	NA	NA	NA	NA	NA	NA	0.4	DALYs per 100,000 population	7949.52	7728.34	7746.53	7458.78	7806.47	7468.94	7428.72	7282.48	7236.61	7301.01	7312.99	7182.36	7116.17	7177.63	7357.84
89	PEV (Pre-Erythrocytic Vaccine)	3	0.35	10	1	Infants	6, 10, &, 14 weeks	None	0.498525	0.69	0.85	0.85	NA	NA	5-17mo	0 yrs	None	0.7	0.81	0.93	0.93	NA	NA	None	NA	NA	NA	NA	NA	NA	NA	NA	0.4	Income and productivity gains from delivering vaccine (US$ / dose)	-0.0996686	0.370187	0.553544	0.926505	0.809363	0.955741	1.07586	1.3867	1.78037	2.06079	2.18488	2.43909	2.51792	2.55201	2.77071
90	PEV (Pre-Erythrocytic Vaccine)	3	0.35	10	1	Infants	6, 10, &, 14 weeks	None	0.498525	0.69	0.85	0.85	NA	NA	5-17mo	0 yrs	None	0.5	0.69	0.85	0.85	NA	NA	None	NA	NA	NA	NA	NA	NA	NA	NA	0.4	Cases per 100,000 population	86062	84986.2	84297.8	83656.3	83070.7	82991.3	82132	80978.8	80852.1	80019.9	79673.4	79259.1	77994.4	77478	77306.9
90	PEV (Pre-Erythrocytic Vaccine)	3	0.35	10	1	Infants	6, 10, &, 14 weeks	None	0.498525	0.69	0.85	0.85	NA	NA	5-17mo	0 yrs	None	0.5	0.69	0.85	0.85	NA	NA	None	NA	NA	NA	NA	NA	NA	NA	NA	0.4	Severe Cases per 100,000 population	1488.55	1456.73	1450.18	1420.45	1403.18	1408	1399.73	1368.18	1373.82	1366.18	1386	1362.18	1334.36	1323.64	1333.73
90	PEV (Pre-Erythrocytic Vaccine)	3	0.35	10	1	Infants	6, 10, &, 14 weeks	None	0.498525	0.69	0.85	0.85	NA	NA	5-17mo	0 yrs	None	0.5	0.69	0.85	0.85	NA	NA	None	NA	NA	NA	NA	NA	NA	NA	NA	0.4	Deaths per 100,000 population	309.182	304.182	295.273	294.727	291.091	291.364	304.455	285.364	289.818	293.818	289.364	288.364	279.364	275.727	287.818
90	PEV (Pre-Erythrocytic Vaccine)	3	0.35	10	1	Infants	6, 10, &, 14 weeks	None	0.498525	0.69	0.85	0.85	NA	NA	5-17mo	0 yrs	None	0.5	0.69	0.85	0.85	NA	NA	None	NA	NA	NA	NA	NA	NA	NA	NA	0.4	Cases in <5yo per 100,000 population	6693.45	6245	5933.73	5599.36	5593	5612.73	5552.91	5401.45	5381.55	5425.36	5370.18	5425.73	5255.64	5178.36	5219
90	PEV (Pre-Erythrocytic Vaccine)	3	0.35	10	1	Infants	6, 10, &, 14 weeks	None	0.498525	0.69	0.85	0.85	NA	NA	5-17mo	0 yrs	None	0.5	0.69	0.85	0.85	NA	NA	None	NA	NA	NA	NA	NA	NA	NA	NA	0.4	Severe Cases in <5yo per 100,000 population	337	309.091	314.091	288.182	287.091	297.545	285.909	277.364	282.273	281.455	286.364	286.364	274.182	273.909	268.182
90	PEV (Pre-Erythrocytic Vaccine)	3	0.35	10	1	Infants	6, 10, &, 14 weeks	None	0.498525	0.69	0.85	0.85	NA	NA	5-17mo	0 yrs	None	0.5	0.69	0.85	0.85	NA	NA	None	NA	NA	NA	NA	NA	NA	NA	NA	0.4	Deaths in < 5yo per 100,000 population	83.5455	77.6364	77.2727	69.6364	75.7273	73.6364	81.4545	69.7273	75.9091	74.4545	73	77.0909	69.6364	70.4545	76.2727
90	PEV (Pre-Erythrocytic Vaccine)	3	0.35	10	1	Infants	6, 10, &, 14 weeks	None	0.498525	0.69	0.85	0.85	NA	NA	5-17mo	0 yrs	None	0.5	0.69	0.85	0.85	NA	NA	None	NA	NA	NA	NA	NA	NA	NA	NA	0.4	DALYs per 100,000 population	7834.39	7713.26	7538.13	7494.92	7415.74	7428.79	7719.65	7302.99	7358.76	7446.35	7330.43	7342.13	7071.39	7010.22	7325.35
90	PEV (Pre-Erythrocytic Vaccine)	3	0.35	10	1	Infants	6, 10, &, 14 weeks	None	0.498525	0.69	0.85	0.85	NA	NA	5-17mo	0 yrs	None	0.5	0.69	0.85	0.85	NA	NA	None	NA	NA	NA	NA	NA	NA	NA	NA	0.4	Income and productivity gains from delivering vaccine (US$ / dose)	-0.0335464	0.278043	0.500331	0.671954	0.913179	0.92923	1.24492	1.58834	1.6181	1.91946	2.01935	2.2044	2.66293	2.79762	2.86668
91	PEV (Pre-Erythrocytic Vaccine)	3	0.35	10	10	Infants	6, 10, &, 14 weeks	None	0.893855	0.95	0.97	0.97	NA	NA	5-17mo	0 yrs	None	0.89	0.95	0.97	0.97	NA	NA	None	NA	NA	NA	NA	NA	NA	NA	NA	0.4	Cases per 100,000 population	138610	136024	134471	133320	132236	131112	130441	130250	130202	129812	129752	129905	130003	130510	131079
91	PEV (Pre-Erythrocytic Vaccine)	3	0.35	10	10	Infants	6, 10, &, 14 weeks	None	0.893855	0.95	0.97	0.97	NA	NA	5-17mo	0 yrs	None	0.89	0.95	0.97	0.97	NA	NA	None	NA	NA	NA	NA	NA	NA	NA	NA	0.4	Severe Cases per 100,000 population	1778.82	1690	1656	1632.82	1639.91	1657.82	1656.27	1698.91	1725.91	1735.27	1749.45	1763.45	1768.64	1787.55	1768.91
91	PEV (Pre-Erythrocytic Vaccine)	3	0.35	10	10	Infants	6, 10, &, 14 weeks	None	0.893855	0.95	0.97	0.97	NA	NA	5-17mo	0 yrs	None	0.89	0.95	0.97	0.97	NA	NA	None	NA	NA	NA	NA	NA	NA	NA	NA	0.4	Deaths per 100,000 population	359	338.273	329.273	326.909	322.182	326	318.455	334	335.455	337.545	341.545	339	342.273	347.455	353.727
91	PEV (Pre-Erythrocytic Vaccine)	3	0.35	10	10	Infants	6, 10, &, 14 weeks	None	0.893855	0.95	0.97	0.97	NA	NA	5-17mo	0 yrs	None	0.89	0.95	0.97	0.97	NA	NA	None	NA	NA	NA	NA	NA	NA	NA	NA	0.4	Cases in <5yo per 100,000 population	29013	26946.8	25491.8	24442.7	24150.1	23776	23708.5	23724	23721.4	23660.9	23545.7	23581.3	23466.5	23540.8	23491.1
91	PEV (Pre-Erythrocytic Vaccine)	3	0.35	10	10	Infants	6, 10, &, 14 weeks	None	0.893855	0.95	0.97	0.97	NA	NA	5-17mo	0 yrs	None	0.89	0.95	0.97	0.97	NA	NA	None	NA	NA	NA	NA	NA	NA	NA	NA	0.4	Severe Cases in <5yo per 100,000 population	1136.73	1061.18	1033.73	1009.64	1016.55	1013.45	992.545	1015.45	1007.91	1008.36	1014.09	1007.91	997.182	1008.09	987.636
91	PEV (Pre-Erythrocytic Vaccine)	3	0.35	10	10	Infants	6, 10, &, 14 weeks	None	0.893855	0.95	0.97	0.97	NA	NA	5-17mo	0 yrs	None	0.89	0.95	0.97	0.97	NA	NA	None	NA	NA	NA	NA	NA	NA	NA	NA	0.4	Deaths in < 5yo per 100,000 population	228.364	211.182	201.818	202	206.364	196.273	187.455	200.636	203.636	199.182	198.909	194.455	196.455	198	199.909
91	PEV (Pre-Erythrocytic Vaccine)	3	0.35	10	10	Infants	6, 10, &, 14 weeks	None	0.893855	0.95	0.97	0.97	NA	NA	5-17mo	0 yrs	None	0.89	0.95	0.97	0.97	NA	NA	None	NA	NA	NA	NA	NA	NA	NA	NA	0.4	DALYs per 100,000 population	9717.74	9176.23	8931.51	8883.73	8795.6	8846.39	8643.87	9081.08	9087.69	9161.41	9258.19	9177.27	9250.35	9427.27	9562.83
91	PEV (Pre-Erythrocytic Vaccine)	3	0.35	10	10	Infants	6, 10, &, 14 weeks	None	0.893855	0.95	0.97	0.97	NA	NA	5-17mo	0 yrs	None	0.89	0.95	0.97	0.97	NA	NA	None	NA	NA	NA	NA	NA	NA	NA	NA	0.4	Income and productivity gains from delivering vaccine (US$ / dose)	0.16991	0.661854	0.829011	1.00607	1.18982	1.39959	1.5199	1.55606	1.55489	1.6412	1.62966	1.60042	1.53683	1.43198	1.29189
92	PEV (Pre-Erythrocytic Vaccine)	3	0.35	10	10	Infants	6, 10, &, 14 weeks	None	0.893855	0.95	0.97	0.97	NA	NA	5-17mo	0 yrs	None	0.7	0.81	0.93	0.93	NA	NA	None	NA	NA	NA	NA	NA	NA	NA	NA	0.4	Cases per 100,000 population	138744	136314	134666	133506	132369	131717	130723	130113	129943	129609	129779	129876	130125	130511	131046
92	PEV (Pre-Erythrocytic Vaccine)	3	0.35	10	10	Infants	6, 10, &, 14 weeks	None	0.893855	0.95	0.97	0.97	NA	NA	5-17mo	0 yrs	None	0.7	0.81	0.93	0.93	NA	NA	None	NA	NA	NA	NA	NA	NA	NA	NA	0.4	Severe Cases per 100,000 population	1769.18	1704.45	1651.64	1666	1642.73	1643.18	1677.09	1681.45	1716	1741.09	1735.55	1760.36	1802.82	1810.18	1798.91
92	PEV (Pre-Erythrocytic Vaccine)	3	0.35	10	10	Infants	6, 10, &, 14 weeks	None	0.893855	0.95	0.97	0.97	NA	NA	5-17mo	0 yrs	None	0.7	0.81	0.93	0.93	NA	NA	None	NA	NA	NA	NA	NA	NA	NA	NA	0.4	Deaths per 100,000 population	350.273	333.636	318.545	334.455	330.091	323.273	337.091	327.727	336.636	338.364	337	339.455	350	365.364	347.273
92	PEV (Pre-Erythrocytic Vaccine)	3	0.35	10	10	Infants	6, 10, &, 14 weeks	None	0.893855	0.95	0.97	0.97	NA	NA	5-17mo	0 yrs	None	0.7	0.81	0.93	0.93	NA	NA	None	NA	NA	NA	NA	NA	NA	NA	NA	0.4	Cases in <5yo per 100,000 population	29288	27031.4	25570.9	24521.7	24176.5	23952.7	23800.2	23633.6	23633.5	23636.6	23636	23530.4	23559	23524.7	23517
92	PEV (Pre-Erythrocytic Vaccine)	3	0.35	10	10	Infants	6, 10, &, 14 weeks	None	0.893855	0.95	0.97	0.97	NA	NA	5-17mo	0 yrs	None	0.7	0.81	0.93	0.93	NA	NA	None	NA	NA	NA	NA	NA	NA	NA	NA	0.4	Severe Cases in <5yo per 100,000 population	1141.36	1059.91	1023.18	1034.73	1014.64	1008.82	1018.55	1000.45	1008.27	1024.27	1023.82	1011.09	1027.55	1024.18	1020.27
92	PEV (Pre-Erythrocytic Vaccine)	3	0.35	10	10	Infants	6, 10, &, 14 weeks	None	0.893855	0.95	0.97	0.97	NA	NA	5-17mo	0 yrs	None	0.7	0.81	0.93	0.93	NA	NA	None	NA	NA	NA	NA	NA	NA	NA	NA	0.4	Deaths in < 5yo per 100,000 population	229.455	205.091	194.273	204.909	204.636	203.273	208.364	200.273	200.545	201.364	202.636	194.636	200.636	206.273	199.091
92	PEV (Pre-Erythrocytic Vaccine)	3	0.35	10	10	Infants	6, 10, &, 14 weeks	None	0.893855	0.95	0.97	0.97	NA	NA	5-17mo	0 yrs	None	0.7	0.81	0.93	0.93	NA	NA	None	NA	NA	NA	NA	NA	NA	NA	NA	0.4	DALYs per 100,000 population	9506.28	9046.84	8640.56	9076.3	8961.11	8788.99	9165.28	8884.93	9126.31	9182.01	9144.45	9216.02	9475.13	9879.04	9432.57
92	PEV (Pre-Erythrocytic Vaccine)	3	0.35	10	10	Infants	6, 10, &, 14 weeks	None	0.893855	0.95	0.97	0.97	NA	NA	5-17mo	0 yrs	None	0.7	0.81	0.93	0.93	NA	NA	None	NA	NA	NA	NA	NA	NA	NA	NA	0.4	Income and productivity gains from delivering vaccine (US$ / dose)	0.185679	0.577196	0.81028	0.952526	1.17736	1.2928	1.47898	1.60891	1.60203	1.65903	1.6308	1.59864	1.50652	1.43229	1.28813
93	PEV (Pre-Erythrocytic Vaccine)	3	0.35	10	10	Infants	6, 10, &, 14 weeks	None	0.893855	0.95	0.97	0.97	NA	NA	5-17mo	0 yrs	None	0.5	0.69	0.85	0.85	NA	NA	None	NA	NA	NA	NA	NA	NA	NA	NA	0.4	Cases per 100,000 population	138856	136581	135071	133620	132619	131694	130717	130238	129626	129878	129697	129814	129927	130313	130935
93	PEV (Pre-Erythrocytic Vaccine)	3	0.35	10	10	Infants	6, 10, &, 14 weeks	None	0.893855	0.95	0.97	0.97	NA	NA	5-17mo	0 yrs	None	0.5	0.69	0.85	0.85	NA	NA	None	NA	NA	NA	NA	NA	NA	NA	NA	0.4	Severe Cases per 100,000 population	1792.09	1672.64	1660.82	1667.09	1629.55	1672.64	1663	1689.45	1688.27	1718	1743.18	1758.09	1770.55	1791.45	1797.91
93	PEV (Pre-Erythrocytic Vaccine)	3	0.35	10	10	Infants	6, 10, &, 14 weeks	None	0.893855	0.95	0.97	0.97	NA	NA	5-17mo	0 yrs	None	0.5	0.69	0.85	0.85	NA	NA	None	NA	NA	NA	NA	NA	NA	NA	NA	0.4	Deaths per 100,000 population	355.636	333.364	332.364	330.455	321.909	333.727	321.909	327.364	341	328.364	343	349.818	350.636	347.273	349.273
93	PEV (Pre-Erythrocytic Vaccine)	3	0.35	10	10	Infants	6, 10, &, 14 weeks	None	0.893855	0.95	0.97	0.97	NA	NA	5-17mo	0 yrs	None	0.5	0.69	0.85	0.85	NA	NA	None	NA	NA	NA	NA	NA	NA	NA	NA	0.4	Cases in <5yo per 100,000 population	29401.6	27397.5	25891	24733.4	24175.7	23905.3	23756.1	23723.8	23526.1	23649.8	23557.8	23540.1	23443.2	23464.2	23487.4
93	PEV (Pre-Erythrocytic Vaccine)	3	0.35	10	10	Infants	6, 10, &, 14 weeks	None	0.893855	0.95	0.97	0.97	NA	NA	5-17mo	0 yrs	None	0.5	0.69	0.85	0.85	NA	NA	None	NA	NA	NA	NA	NA	NA	NA	NA	0.4	Severe Cases in <5yo per 100,000 population	1151.36	1043.91	1027.36	1036.64	1012.91	1023.09	1004.45	1021.64	1002.55	1001.09	1017.55	1006	1008.36	1011.73	1012.73
93	PEV (Pre-Erythrocytic Vaccine)	3	0.35	10	10	Infants	6, 10, &, 14 weeks	None	0.893855	0.95	0.97	0.97	NA	NA	5-17mo	0 yrs	None	0.5	0.69	0.85	0.85	NA	NA	None	NA	NA	NA	NA	NA	NA	NA	NA	0.4	Deaths in < 5yo per 100,000 population	226.273	206.818	206.727	204.455	195.636	206.182	196.909	196.455	203.545	193.909	198.727	202.182	199.545	194.636	202.727
93	PEV (Pre-Erythrocytic Vaccine)	3	0.35	10	10	Infants	6, 10, &, 14 weeks	None	0.893855	0.95	0.97	0.97	NA	NA	5-17mo	0 yrs	None	0.5	0.69	0.85	0.85	NA	NA	None	NA	NA	NA	NA	NA	NA	NA	NA	0.4	DALYs per 100,000 population	9624.89	9077.65	9038.73	8944.36	8730.26	9058.32	8743.92	8917.27	9256.32	8933.27	9303.91	9441.82	9474.4	9393.84	9440.04
93	PEV (Pre-Erythrocytic Vaccine)	3	0.35	10	10	Infants	6, 10, &, 14 weeks	None	0.893855	0.95	0.97	0.97	NA	NA	5-17mo	0 yrs	None	0.5	0.69	0.85	0.85	NA	NA	None	NA	NA	NA	NA	NA	NA	NA	NA	0.4	Income and productivity gains from delivering vaccine (US$ / dose)	0.170802	0.596057	0.760475	0.946726	1.12137	1.2933	1.47657	1.57158	1.69947	1.61992	1.64364	1.61396	1.5657	1.47187	1.31162
94	PEV (Pre-Erythrocytic Vaccine)	3	0.35	10	10	Infants	6, 10, &, 14 weeks	None	0.700569	0.81	0.93	0.93	NA	NA	5-17mo	0 yrs	None	0.89	0.95	0.97	0.97	NA	NA	None	NA	NA	NA	NA	NA	NA	NA	NA	0.4	Cases per 100,000 population	138557	136481	135242	134326	133398	132720	132299	131996	131924	131743	131521	131573	131988	132431	132881
94	PEV (Pre-Erythrocytic Vaccine)	3	0.35	10	10	Infants	6, 10, &, 14 weeks	None	0.700569	0.81	0.93	0.93	NA	NA	5-17mo	0 yrs	None	0.89	0.95	0.97	0.97	NA	NA	None	NA	NA	NA	NA	NA	NA	NA	NA	0.4	Severe Cases per 100,000 population	1782.36	1711.91	1683.45	1678.91	1682.36	1710.91	1730	1704.91	1748.82	1752.09	1769.27	1760.36	1790.27	1808.18	1818.82
94	PEV (Pre-Erythrocytic Vaccine)	3	0.35	10	10	Infants	6, 10, &, 14 weeks	None	0.700569	0.81	0.93	0.93	NA	NA	5-17mo	0 yrs	None	0.89	0.95	0.97	0.97	NA	NA	None	NA	NA	NA	NA	NA	NA	NA	NA	0.4	Deaths per 100,000 population	344.818	338.818	338.636	338.818	330.455	340.727	335.455	346.909	337.727	341.909	350.909	342.636	352.182	353.364	350.909
94	PEV (Pre-Erythrocytic Vaccine)	3	0.35	10	10	Infants	6, 10, &, 14 weeks	None	0.700569	0.81	0.93	0.93	NA	NA	5-17mo	0 yrs	None	0.89	0.95	0.97	0.97	NA	NA	None	NA	NA	NA	NA	NA	NA	NA	NA	0.4	Cases in <5yo per 100,000 population	29159.8	27323.8	26236.7	25358.8	25322.5	25090.9	25010.9	25011.1	24979.9	24899.2	24881.8	24792.4	24785.5	24833.8	24801.5
94	PEV (Pre-Erythrocytic Vaccine)	3	0.35	10	10	Infants	6, 10, &, 14 weeks	None	0.700569	0.81	0.93	0.93	NA	NA	5-17mo	0 yrs	None	0.89	0.95	0.97	0.97	NA	NA	None	NA	NA	NA	NA	NA	NA	NA	NA	0.4	Severe Cases in <5yo per 100,000 population	1147	1082.09	1054.73	1046.18	1054.91	1063.91	1059.55	1035.36	1057.27	1042.27	1050.18	1039	1038.18	1046.27	1045.91
94	PEV (Pre-Erythrocytic Vaccine)	3	0.35	10	10	Infants	6, 10, &, 14 weeks	None	0.700569	0.81	0.93	0.93	NA	NA	5-17mo	0 yrs	None	0.89	0.95	0.97	0.97	NA	NA	None	NA	NA	NA	NA	NA	NA	NA	NA	0.4	Deaths in < 5yo per 100,000 population	219.364	211.273	208.273	209.091	203.727	214.818	206.545	210.182	206.818	203.091	210.091	207.091	209	206.273	201.182
94	PEV (Pre-Erythrocytic Vaccine)	3	0.35	10	10	Infants	6, 10, &, 14 weeks	None	0.700569	0.81	0.93	0.93	NA	NA	5-17mo	0 yrs	None	0.89	0.95	0.97	0.97	NA	NA	None	NA	NA	NA	NA	NA	NA	NA	NA	0.4	DALYs per 100,000 population	9399.83	9210.27	9169.82	9202.78	9007.75	9235.27	9084.6	9399.84	9147.48	9291.06	9489.34	9320.12	9554.29	9584.16	9490.15
94	PEV (Pre-Erythrocytic Vaccine)	3	0.35	10	10	Infants	6, 10, &, 14 weeks	None	0.700569	0.81	0.93	0.93	NA	NA	5-17mo	0 yrs	None	0.89	0.95	0.97	0.97	NA	NA	None	NA	NA	NA	NA	NA	NA	NA	NA	0.4	Income and productivity gains from delivering vaccine (US$ / dose)	0.214076	0.70893	0.900014	1.01469	1.27478	1.42179	1.48665	1.6191	1.57875	1.62204	1.67278	1.63964	1.51805	1.38668	1.24099
95	PEV (Pre-Erythrocytic Vaccine)	3	0.35	10	10	Infants	6, 10, &, 14 weeks	None	0.700569	0.81	0.93	0.93	NA	NA	5-17mo	0 yrs	None	0.7	0.81	0.93	0.93	NA	NA	None	NA	NA	NA	NA	NA	NA	NA	NA	0.4	Cases per 100,000 population	138706	136759	135253	134489	133595	132841	132169	131753	131692	131829	131763	131833	132192	132562	132611
95	PEV (Pre-Erythrocytic Vaccine)	3	0.35	10	10	Infants	6, 10, &, 14 weeks	None	0.700569	0.81	0.93	0.93	NA	NA	5-17mo	0 yrs	None	0.7	0.81	0.93	0.93	NA	NA	None	NA	NA	NA	NA	NA	NA	NA	NA	0.4	Severe Cases per 100,000 population	1764.64	1700.73	1678.18	1672.73	1695.73	1704.36	1715.82	1747.09	1730.73	1753.55	1794.55	1785.91	1780.09	1789.91	1784.09
95	PEV (Pre-Erythrocytic Vaccine)	3	0.35	10	10	Infants	6, 10, &, 14 weeks	None	0.700569	0.81	0.93	0.93	NA	NA	5-17mo	0 yrs	None	0.7	0.81	0.93	0.93	NA	NA	None	NA	NA	NA	NA	NA	NA	NA	NA	0.4	Deaths per 100,000 population	354.091	341.727	344.182	338.909	332.455	342.364	332.091	337.091	348.818	339.455	355.545	353.545	348.091	352.182	364.273
95	PEV (Pre-Erythrocytic Vaccine)	3	0.35	10	10	Infants	6, 10, &, 14 weeks	None	0.700569	0.81	0.93	0.93	NA	NA	5-17mo	0 yrs	None	0.7	0.81	0.93	0.93	NA	NA	None	NA	NA	NA	NA	NA	NA	NA	NA	0.4	Cases in <5yo per 100,000 population	29179.6	27537	26333.7	25415.5	25344.3	25055.3	24919.2	24932	24870.2	24946.4	24946.1	24840.5	24906.3	24890.1	24775.2
95	PEV (Pre-Erythrocytic Vaccine)	3	0.35	10	10	Infants	6, 10, &, 14 weeks	None	0.700569	0.81	0.93	0.93	NA	NA	5-17mo	0 yrs	None	0.7	0.81	0.93	0.93	NA	NA	None	NA	NA	NA	NA	NA	NA	NA	NA	0.4	Severe Cases in <5yo per 100,000 population	1146	1077.09	1047.09	1050.55	1063.27	1057.82	1054.45	1064.36	1045.09	1059.09	1061.73	1042.82	1049.45	1032.09	1031.91
95	PEV (Pre-Erythrocytic Vaccine)	3	0.35	10	10	Infants	6, 10, &, 14 weeks	None	0.700569	0.81	0.93	0.93	NA	NA	5-17mo	0 yrs	None	0.7	0.81	0.93	0.93	NA	NA	None	NA	NA	NA	NA	NA	NA	NA	NA	0.4	Deaths in < 5yo per 100,000 population	224.727	216.818	213.273	210.091	210.727	209	206.455	207.273	212.727	205.091	208.636	206.455	212.091	205.182	215.545
95	PEV (Pre-Erythrocytic Vaccine)	3	0.35	10	10	Infants	6, 10, &, 14 weeks	None	0.700569	0.81	0.93	0.93	NA	NA	5-17mo	0 yrs	None	0.7	0.81	0.93	0.93	NA	NA	None	NA	NA	NA	NA	NA	NA	NA	NA	0.4	DALYs per 100,000 population	9617.47	9264.75	9354.2	9191.34	9013.58	9278.92	9011.46	9160.28	9461.55	9253.89	9629.96	9536.27	9458.47	9558.77	9836.8
95	PEV (Pre-Erythrocytic Vaccine)	3	0.35	10	10	Infants	6, 10, &, 14 weeks	None	0.700569	0.81	0.93	0.93	NA	NA	5-17mo	0 yrs	None	0.7	0.81	0.93	0.93	NA	NA	None	NA	NA	NA	NA	NA	NA	NA	NA	0.4	Income and productivity gains from delivering vaccine (US$ / dose)	0.207724	0.675403	0.903087	0.995636	1.21099	1.38297	1.5276	1.63012	1.6608	1.60108	1.59118	1.56825	1.48222	1.36955	1.32787
96	PEV (Pre-Erythrocytic Vaccine)	3	0.35	10	10	Infants	6, 10, &, 14 weeks	None	0.700569	0.81	0.93	0.93	NA	NA	5-17mo	0 yrs	None	0.5	0.69	0.85	0.85	NA	NA	None	NA	NA	NA	NA	NA	NA	NA	NA	0.4	Cases per 100,000 population	138901	137150	135668	134581	133576	132927	132342	132001	131505	131689	131932	131723	132196	132524	132505
96	PEV (Pre-Erythrocytic Vaccine)	3	0.35	10	10	Infants	6, 10, &, 14 weeks	None	0.700569	0.81	0.93	0.93	NA	NA	5-17mo	0 yrs	None	0.5	0.69	0.85	0.85	NA	NA	None	NA	NA	NA	NA	NA	NA	NA	NA	0.4	Severe Cases per 100,000 population	1783.73	1689.64	1699	1666.91	1687.45	1691.64	1703.64	1704.09	1751	1768.36	1755.55	1780.45	1775.27	1810.82	1825.64
96	PEV (Pre-Erythrocytic Vaccine)	3	0.35	10	10	Infants	6, 10, &, 14 weeks	None	0.700569	0.81	0.93	0.93	NA	NA	5-17mo	0 yrs	None	0.5	0.69	0.85	0.85	NA	NA	None	NA	NA	NA	NA	NA	NA	NA	NA	0.4	Deaths per 100,000 population	347.909	344.091	335.182	326.909	332.727	341.273	339.727	340.455	337.273	356.818	352.909	345.455	349.818	360.455	357.455
96	PEV (Pre-Erythrocytic Vaccine)	3	0.35	10	10	Infants	6, 10, &, 14 weeks	None	0.700569	0.81	0.93	0.93	NA	NA	5-17mo	0 yrs	None	0.5	0.69	0.85	0.85	NA	NA	None	NA	NA	NA	NA	NA	NA	NA	NA	0.4	Cases in <5yo per 100,000 population	29421.3	27736.2	26480.7	25637.4	25338.9	25051.4	24979.4	24971	24862.6	24975.6	24990.3	24878.3	24860.9	24921.4	24863.4
96	PEV (Pre-Erythrocytic Vaccine)	3	0.35	10	10	Infants	6, 10, &, 14 weeks	None	0.700569	0.81	0.93	0.93	NA	NA	5-17mo	0 yrs	None	0.5	0.69	0.85	0.85	NA	NA	None	NA	NA	NA	NA	NA	NA	NA	NA	0.4	Severe Cases in <5yo per 100,000 population	1144.82	1060.09	1078	1045.91	1052	1053.45	1039.64	1047.45	1056	1061	1050.36	1047.64	1035.82	1049.36	1050.82
96	PEV (Pre-Erythrocytic Vaccine)	3	0.35	10	10	Infants	6, 10, &, 14 weeks	None	0.700569	0.81	0.93	0.93	NA	NA	5-17mo	0 yrs	None	0.5	0.69	0.85	0.85	NA	NA	None	NA	NA	NA	NA	NA	NA	NA	NA	0.4	Deaths in < 5yo per 100,000 population	225.364	213.909	213.818	205.273	205.545	209.636	204.545	206.727	202.182	222.091	211.182	204	210.273	210.455	212
96	PEV (Pre-Erythrocytic Vaccine)	3	0.35	10	10	Infants	6, 10, &, 14 weeks	None	0.700569	0.81	0.93	0.93	NA	NA	5-17mo	0 yrs	None	0.5	0.69	0.85	0.85	NA	NA	None	NA	NA	NA	NA	NA	NA	NA	NA	0.4	DALYs per 100,000 population	9428.94	9319.87	9098.28	8858.98	9009.07	9263.74	9220.12	9227.03	9148.74	9674.8	9540.27	9360.23	9477.5	9746.18	9683.78
96	PEV (Pre-Erythrocytic Vaccine)	3	0.35	10	10	Infants	6, 10, &, 14 weeks	None	0.700569	0.81	0.93	0.93	NA	NA	5-17mo	0 yrs	None	0.5	0.69	0.85	0.85	NA	NA	None	NA	NA	NA	NA	NA	NA	NA	NA	0.4	Income and productivity gains from delivering vaccine (US$ / dose)	0.196786	0.592542	0.802897	0.98569	1.22822	1.3761	1.50368	1.60443	1.67636	1.63752	1.59187	1.60853	1.47101	1.37618	1.32681
97	PEV (Pre-Erythrocytic Vaccine)	3	0.35	10	10	Infants	6, 10, &, 14 weeks	None	0.498525	0.69	0.85	0.85	NA	NA	5-17mo	0 yrs	None	0.89	0.95	0.97	0.97	NA	NA	None	NA	NA	NA	NA	NA	NA	NA	NA	0.4	Cases per 100,000 population	138758	136994	135930	134988	134724	134112	133882	133527	133308	133482	133843	133954	133973	134296	134532
97	PEV (Pre-Erythrocytic Vaccine)	3	0.35	10	10	Infants	6, 10, &, 14 weeks	None	0.498525	0.69	0.85	0.85	NA	NA	5-17mo	0 yrs	None	0.89	0.95	0.97	0.97	NA	NA	None	NA	NA	NA	NA	NA	NA	NA	NA	0.4	Severe Cases per 100,000 population	1776.36	1706.55	1715.18	1737	1727.64	1739	1714.45	1753.64	1794.73	1792.64	1806.82	1807.73	1828.45	1824.64	1824.09
97	PEV (Pre-Erythrocytic Vaccine)	3	0.35	10	10	Infants	6, 10, &, 14 weeks	None	0.498525	0.69	0.85	0.85	NA	NA	5-17mo	0 yrs	None	0.89	0.95	0.97	0.97	NA	NA	None	NA	NA	NA	NA	NA	NA	NA	NA	0.4	Deaths per 100,000 population	347.545	343.091	345.091	331.182	338.909	332.273	342.727	349.455	357.455	353.545	356.909	353.727	361.455	352.273	353.909
97	PEV (Pre-Erythrocytic Vaccine)	3	0.35	10	10	Infants	6, 10, &, 14 weeks	None	0.498525	0.69	0.85	0.85	NA	NA	5-17mo	0 yrs	None	0.89	0.95	0.97	0.97	NA	NA	None	NA	NA	NA	NA	NA	NA	NA	NA	0.4	Cases in <5yo per 100,000 population	29175.4	27638.1	26907.2	26121.5	26416.5	26343.5	26324.3	26174.8	26095.4	26197.6	26141.6	26199.9	26141.3	26155.9	26139.7
97	PEV (Pre-Erythrocytic Vaccine)	3	0.35	10	10	Infants	6, 10, &, 14 weeks	None	0.498525	0.69	0.85	0.85	NA	NA	5-17mo	0 yrs	None	0.89	0.95	0.97	0.97	NA	NA	None	NA	NA	NA	NA	NA	NA	NA	NA	0.4	Severe Cases in <5yo per 100,000 population	1151	1091.18	1083.91	1089.45	1084	1098.09	1070.64	1080.27	1099.36	1092.82	1095.09	1086.27	1093.09	1085.36	1093.18
97	PEV (Pre-Erythrocytic Vaccine)	3	0.35	10	10	Infants	6, 10, &, 14 weeks	None	0.498525	0.69	0.85	0.85	NA	NA	5-17mo	0 yrs	None	0.89	0.95	0.97	0.97	NA	NA	None	NA	NA	NA	NA	NA	NA	NA	NA	0.4	Deaths in < 5yo per 100,000 population	222.182	215.545	221.636	206.273	208.455	209.091	213.273	216.182	219.818	214.273	216.636	218.455	220.364	213.455	213.182
97	PEV (Pre-Erythrocytic Vaccine)	3	0.35	10	10	Infants	6, 10, &, 14 weeks	None	0.498525	0.69	0.85	0.85	NA	NA	5-17mo	0 yrs	None	0.89	0.95	0.97	0.97	NA	NA	None	NA	NA	NA	NA	NA	NA	NA	NA	0.4	DALYs per 100,000 population	9411.11	9308.53	9385.7	8998.73	9220.48	9025.47	9331.82	9452.52	9715.74	9597.73	9673.92	9600.23	9801.73	9549.17	9596.07
97	PEV (Pre-Erythrocytic Vaccine)	3	0.35	10	10	Infants	6, 10, &, 14 weeks	None	0.498525	0.69	0.85	0.85	NA	NA	5-17mo	0 yrs	None	0.89	0.95	0.97	0.97	NA	NA	None	NA	NA	NA	NA	NA	NA	NA	NA	0.4	Income and productivity gains from delivering vaccine (US$ / dose)	0.207835	0.770099	0.997394	1.139	1.2821	1.50079	1.60657	1.67278	1.6515	1.62585	1.50232	1.46209	1.41317	1.31144	1.19862
98	PEV (Pre-Erythrocytic Vaccine)	3	0.35	10	10	Infants	6, 10, &, 14 weeks	None	0.498525	0.69	0.85	0.85	NA	NA	5-17mo	0 yrs	None	0.7	0.81	0.93	0.93	NA	NA	None	NA	NA	NA	NA	NA	NA	NA	NA	0.4	Cases per 100,000 population	139015	137165	136267	135516	134761	134420	133892	133808	133337	133735	133697	133641	134029	134459	134864
98	PEV (Pre-Erythrocytic Vaccine)	3	0.35	10	10	Infants	6, 10, &, 14 weeks	None	0.498525	0.69	0.85	0.85	NA	NA	5-17mo	0 yrs	None	0.7	0.81	0.93	0.93	NA	NA	None	NA	NA	NA	NA	NA	NA	NA	NA	0.4	Severe Cases per 100,000 population	1775.64	1724.45	1719.18	1721.09	1745.27	1734.91	1751.45	1758.82	1772.55	1787	1786.64	1803.91	1817.73	1827.45	1825.91
98	PEV (Pre-Erythrocytic Vaccine)	3	0.35	10	10	Infants	6, 10, &, 14 weeks	None	0.498525	0.69	0.85	0.85	NA	NA	5-17mo	0 yrs	None	0.7	0.81	0.93	0.93	NA	NA	None	NA	NA	NA	NA	NA	NA	NA	NA	0.4	Deaths per 100,000 population	355.182	341.273	347.727	345	347.273	338.455	343.545	334.545	347.545	349.364	346.364	344.273	356.455	358.909	355.091
98	PEV (Pre-Erythrocytic Vaccine)	3	0.35	10	10	Infants	6, 10, &, 14 weeks	None	0.498525	0.69	0.85	0.85	NA	NA	5-17mo	0 yrs	None	0.7	0.81	0.93	0.93	NA	NA	None	NA	NA	NA	NA	NA	NA	NA	NA	0.4	Cases in <5yo per 100,000 population	29253.5	27750.6	26964.1	26391.2	26360.8	26408.7	26266.6	26310.7	26155.8	26218.5	26201.8	26194	26163.3	26261.7	26224.5
98	PEV (Pre-Erythrocytic Vaccine)	3	0.35	10	10	Infants	6, 10, &, 14 weeks	None	0.498525	0.69	0.85	0.85	NA	NA	5-17mo	0 yrs	None	0.7	0.81	0.93	0.93	NA	NA	None	NA	NA	NA	NA	NA	NA	NA	NA	0.4	Severe Cases in <5yo per 100,000 population	1144.91	1098	1083.64	1092.09	1107.27	1082.82	1096.27	1088.18	1090.55	1090.73	1083.55	1086.09	1090.55	1086.82	1083.82
98	PEV (Pre-Erythrocytic Vaccine)	3	0.35	10	10	Infants	6, 10, &, 14 weeks	None	0.498525	0.69	0.85	0.85	NA	NA	5-17mo	0 yrs	None	0.7	0.81	0.93	0.93	NA	NA	None	NA	NA	NA	NA	NA	NA	NA	NA	0.4	Deaths in < 5yo per 100,000 population	224.545	220.182	219.545	215.455	219.818	213.727	212.364	207.455	215.273	213.364	212.455	211.909	214.273	210.364	209.455
98	PEV (Pre-Erythrocytic Vaccine)	3	0.35	10	10	Infants	6, 10, &, 14 weeks	None	0.498525	0.69	0.85	0.85	NA	NA	5-17mo	0 yrs	None	0.7	0.81	0.93	0.93	NA	NA	None	NA	NA	NA	NA	NA	NA	NA	NA	0.4	DALYs per 100,000 population	9639.66	9255.93	9426.61	9338.66	9444.63	9171.03	9307.76	9122.18	9400.66	9466.49	9401.61	9326.4	9652.36	9733.2	9613.03
98	PEV (Pre-Erythrocytic Vaccine)	3	0.35	10	10	Infants	6, 10, &, 14 weeks	None	0.498525	0.69	0.85	0.85	NA	NA	5-17mo	0 yrs	None	0.7	0.81	0.93	0.93	NA	NA	None	NA	NA	NA	NA	NA	NA	NA	NA	0.4	Income and productivity gains from delivering vaccine (US$ / dose)	0.184045	0.704984	0.892512	1.04137	1.27189	1.39454	1.53618	1.5867	1.69801	1.55439	1.56868	1.56074	1.41866	1.27476	1.0944
99	PEV (Pre-Erythrocytic Vaccine)	3	0.35	10	10	Infants	6, 10, &, 14 weeks	None	0.498525	0.69	0.85	0.85	NA	NA	5-17mo	0 yrs	None	0.5	0.69	0.85	0.85	NA	NA	None	NA	NA	NA	NA	NA	NA	NA	NA	0.4	Cases per 100,000 population	139118	137281	136300	135403	134886	134340	133933	133866	133474	133671	133951	133834	134156	134376	134871
99	PEV (Pre-Erythrocytic Vaccine)	3	0.35	10	10	Infants	6, 10, &, 14 weeks	None	0.498525	0.69	0.85	0.85	NA	NA	5-17mo	0 yrs	None	0.5	0.69	0.85	0.85	NA	NA	None	NA	NA	NA	NA	NA	NA	NA	NA	0.4	Severe Cases per 100,000 population	1782.45	1750.27	1723.55	1714.27	1738.09	1741.64	1727.55	1759.73	1781.09	1761.73	1792.64	1790.45	1817.09	1842.82	1819.18
99	PEV (Pre-Erythrocytic Vaccine)	3	0.35	10	10	Infants	6, 10, &, 14 weeks	None	0.498525	0.69	0.85	0.85	NA	NA	5-17mo	0 yrs	None	0.5	0.69	0.85	0.85	NA	NA	None	NA	NA	NA	NA	NA	NA	NA	NA	0.4	Deaths per 100,000 population	356.273	356.455	345.091	341.909	338.364	338.818	350	345.909	348	347.182	352.636	353.091	363.818	360.182	364.727
99	PEV (Pre-Erythrocytic Vaccine)	3	0.35	10	10	Infants	6, 10, &, 14 weeks	None	0.498525	0.69	0.85	0.85	NA	NA	5-17mo	0 yrs	None	0.5	0.69	0.85	0.85	NA	NA	None	NA	NA	NA	NA	NA	NA	NA	NA	0.4	Cases in <5yo per 100,000 population	29489	27971.8	27171.1	26593.5	26519.5	26361.9	26243.8	26276.5	26173.9	26209.3	26263.2	26143.9	26196.5	26178.5	26204.7
99	PEV (Pre-Erythrocytic Vaccine)	3	0.35	10	10	Infants	6, 10, &, 14 weeks	None	0.498525	0.69	0.85	0.85	NA	NA	5-17mo	0 yrs	None	0.5	0.69	0.85	0.85	NA	NA	None	NA	NA	NA	NA	NA	NA	NA	NA	0.4	Severe Cases in <5yo per 100,000 population	1151.45	1110.82	1091.09	1077	1092.64	1092.82	1078.64	1115.82	1100.09	1076.64	1092.91	1082.18	1089.91	1101.09	1097.64
99	PEV (Pre-Erythrocytic Vaccine)	3	0.35	10	10	Infants	6, 10, &, 14 weeks	None	0.498525	0.69	0.85	0.85	NA	NA	5-17mo	0 yrs	None	0.5	0.69	0.85	0.85	NA	NA	None	NA	NA	NA	NA	NA	NA	NA	NA	0.4	Deaths in < 5yo per 100,000 population	227.545	228.636	214.545	213	212.545	213.455	217	216.182	212.091	214.091	212.364	217.636	216.364	216.636	221.455
99	PEV (Pre-Erythrocytic Vaccine)	3	0.35	10	10	Infants	6, 10, &, 14 weeks	None	0.498525	0.69	0.85	0.85	NA	NA	5-17mo	0 yrs	None	0.5	0.69	0.85	0.85	NA	NA	None	NA	NA	NA	NA	NA	NA	NA	NA	0.4	DALYs per 100,000 population	9679.32	9695.16	9323.18	9337.77	9185.61	9187.37	9485.34	9387.37	9419.18	9412.38	9545.1	9557.56	9831.28	9771.42	9858.23
99	PEV (Pre-Erythrocytic Vaccine)	3	0.35	10	10	Infants	6, 10, &, 14 weeks	None	0.498525	0.69	0.85	0.85	NA	NA	5-17mo	0 yrs	None	0.5	0.69	0.85	0.85	NA	NA	None	NA	NA	NA	NA	NA	NA	NA	NA	0.4	Income and productivity gains from delivering vaccine (US$ / dose)	0.164973	0.700434	0.905016	1.10137	1.2411	1.40568	1.53447	1.5763	1.63493	1.63033	1.49466	1.52204	1.39469	1.29742	1.1247
100	PEV (Pre-Erythrocytic Vaccine)	3	0.35	10	100	Infants	6, 10, &, 14 weeks	None	0.893855	0.95	0.97	0.97	NA	NA	5-17mo	0 yrs	None	0.89	0.95	0.97	0.97	NA	NA	None	NA	NA	NA	NA	NA	NA	NA	NA	0.4	Cases per 100,000 population	109070	107388	107130	107526	108341	109526	110841	112147	113566	114833	115916	116759	117478	118310	118918
100	PEV (Pre-Erythrocytic Vaccine)	3	0.35	10	100	Infants	6, 10, &, 14 weeks	None	0.893855	0.95	0.97	0.97	NA	NA	5-17mo	0 yrs	None	0.89	0.95	0.97	0.97	NA	NA	None	NA	NA	NA	NA	NA	NA	NA	NA	0.4	Severe Cases per 100,000 population	1412.05	1450.29	1484.05	1560.48	1615.95	1615.86	1640.29	1653.57	1670.38	1662.9	1674.81	1698.14	1674.05	1687.71	1681.24
100	PEV (Pre-Erythrocytic Vaccine)	3	0.35	10	100	Infants	6, 10, &, 14 weeks	None	0.893855	0.95	0.97	0.97	NA	NA	5-17mo	0 yrs	None	0.89	0.95	0.97	0.97	NA	NA	None	NA	NA	NA	NA	NA	NA	NA	NA	0.4	Deaths per 100,000 population	347.714	339.571	341.476	351.048	358.857	370.619	361.19	369.619	374.476	366.381	370.714	367.762	373.429	369.571	375.048
100	PEV (Pre-Erythrocytic Vaccine)	3	0.35	10	100	Infants	6, 10, &, 14 weeks	None	0.893855	0.95	0.97	0.97	NA	NA	5-17mo	0 yrs	None	0.89	0.95	0.97	0.97	NA	NA	None	NA	NA	NA	NA	NA	NA	NA	NA	0.4	Cases in <5yo per 100,000 population	50345.9	48662.5	48382.9	48658	48816.1	49096.4	49096	49036.4	49135.3	49229.5	49196.6	49094.1	49165.4	49232.5	49213.5
100	PEV (Pre-Erythrocytic Vaccine)	3	0.35	10	100	Infants	6, 10, &, 14 weeks	None	0.893855	0.95	0.97	0.97	NA	NA	5-17mo	0 yrs	None	0.89	0.95	0.97	0.97	NA	NA	None	NA	NA	NA	NA	NA	NA	NA	NA	0.4	Severe Cases in <5yo per 100,000 population	1295.9	1334.24	1370.19	1439.43	1472.48	1461.62	1465.81	1467.19	1475	1462	1470.24	1493.1	1466.9	1479.29	1471.62
100	PEV (Pre-Erythrocytic Vaccine)	3	0.35	10	100	Infants	6, 10, &, 14 weeks	None	0.893855	0.95	0.97	0.97	NA	NA	5-17mo	0 yrs	None	0.89	0.95	0.97	0.97	NA	NA	None	NA	NA	NA	NA	NA	NA	NA	NA	0.4	Deaths in < 5yo per 100,000 population	315.81	309.476	307.238	321.381	324.095	329.952	320.048	325.095	329.857	319	325.476	323.048	324.381	322.381	326.762
100	PEV (Pre-Erythrocytic Vaccine)	3	0.35	10	100	Infants	6, 10, &, 14 weeks	None	0.893855	0.95	0.97	0.97	NA	NA	5-17mo	0 yrs	None	0.89	0.95	0.97	0.97	NA	NA	None	NA	NA	NA	NA	NA	NA	NA	NA	0.4	DALYs per 100,000 population	9360.17	9143.62	9202.53	9472.78	9696.49	9995.43	9740.42	9990.03	10133.4	9898.65	10015.9	9954.87	10076.2	10001.7	10124.9
100	PEV (Pre-Erythrocytic Vaccine)	3	0.35	10	100	Infants	6, 10, &, 14 weeks	None	0.893855	0.95	0.97	0.97	NA	NA	5-17mo	0 yrs	None	0.89	0.95	0.97	0.97	NA	NA	None	NA	NA	NA	NA	NA	NA	NA	NA	0.4	Income and productivity gains from delivering vaccine (US$ / dose)	0.263072	0.550746	0.554555	0.462829	0.26957	0.0364425	-0.281754	-0.576271	-0.901466	-1.17084	-1.40554	-1.63752	-1.77353	-1.9494	-2.09414
101	PEV (Pre-Erythrocytic Vaccine)	3	0.35	10	100	Infants	6, 10, &, 14 weeks	None	0.893855	0.95	0.97	0.97	NA	NA	5-17mo	0 yrs	None	0.7	0.81	0.93	0.93	NA	NA	None	NA	NA	NA	NA	NA	NA	NA	NA	0.4	Cases per 100,000 population	109254	107552	107199	107491	108317	109473	110756	112050	113253	114707	115811	116803	117541	118226	118867
101	PEV (Pre-Erythrocytic Vaccine)	3	0.35	10	100	Infants	6, 10, &, 14 weeks	None	0.893855	0.95	0.97	0.97	NA	NA	5-17mo	0 yrs	None	0.7	0.81	0.93	0.93	NA	NA	None	NA	NA	NA	NA	NA	NA	NA	NA	0.4	Severe Cases per 100,000 population	1431.21	1430.95	1500.79	1547.53	1594.63	1623.26	1648.05	1665.16	1663.42	1670.05	1668.47	1668	1669	1663.21	1666
101	PEV (Pre-Erythrocytic Vaccine)	3	0.35	10	100	Infants	6, 10, &, 14 weeks	None	0.893855	0.95	0.97	0.97	NA	NA	5-17mo	0 yrs	None	0.7	0.81	0.93	0.93	NA	NA	None	NA	NA	NA	NA	NA	NA	NA	NA	0.4	Deaths per 100,000 population	350.158	335.579	350.684	355.474	355.684	367.158	366.737	372.947	373.211	374.316	371.579	374.316	373	373.526	379.105
101	PEV (Pre-Erythrocytic Vaccine)	3	0.35	10	100	Infants	6, 10, &, 14 weeks	None	0.893855	0.95	0.97	0.97	NA	NA	5-17mo	0 yrs	None	0.7	0.81	0.93	0.93	NA	NA	None	NA	NA	NA	NA	NA	NA	NA	NA	0.4	Cases in <5yo per 100,000 population	50500.3	48826.1	48500.1	48670.9	48858.5	49020.7	49059.4	49109.5	49088.2	49092.6	49211.5	49265.3	49163.6	49217.1	49385.7
101	PEV (Pre-Erythrocytic Vaccine)	3	0.35	10	100	Infants	6, 10, &, 14 weeks	None	0.893855	0.95	0.97	0.97	NA	NA	5-17mo	0 yrs	None	0.7	0.81	0.93	0.93	NA	NA	None	NA	NA	NA	NA	NA	NA	NA	NA	0.4	Severe Cases in <5yo per 100,000 population	1316.11	1311.95	1382.53	1430.68	1460.95	1473.11	1475.26	1481.53	1465.47	1470.26	1463.53	1461.16	1455.74	1452.11	1452.79
101	PEV (Pre-Erythrocytic Vaccine)	3	0.35	10	100	Infants	6, 10, &, 14 weeks	None	0.893855	0.95	0.97	0.97	NA	NA	5-17mo	0 yrs	None	0.7	0.81	0.93	0.93	NA	NA	None	NA	NA	NA	NA	NA	NA	NA	NA	0.4	Deaths in < 5yo per 100,000 population	318.316	304.842	315.579	323.421	321	330.368	325.737	328.158	326.316	327.053	325	328.211	326	323.474	328.053
101	PEV (Pre-Erythrocytic Vaccine)	3	0.35	10	100	Infants	6, 10, &, 14 weeks	None	0.893855	0.95	0.97	0.97	NA	NA	5-17mo	0 yrs	None	0.7	0.81	0.93	0.93	NA	NA	None	NA	NA	NA	NA	NA	NA	NA	NA	0.4	DALYs per 100,000 population	9440.85	9054.39	9451.3	9584.53	9599.84	9912.71	9898.65	10083.9	10072.9	10120.3	10021.6	10114.5	10061	10091.4	10231
101	PEV (Pre-Erythrocytic Vaccine)	3	0.35	10	100	Infants	6, 10, &, 14 weeks	None	0.893855	0.95	0.97	0.97	NA	NA	5-17mo	0 yrs	None	0.7	0.81	0.93	0.93	NA	NA	None	NA	NA	NA	NA	NA	NA	NA	NA	0.4	Income and productivity gains from delivering vaccine (US$ / dose)	0.245423	0.533445	0.551953	0.491875	0.287675	0.0282098	-0.267321	-0.560379	-0.84066	-1.16429	-1.38377	-1.61267	-1.78481	-1.92077	-2.05007
102	PEV (Pre-Erythrocytic Vaccine)	3	0.35	10	100	Infants	6, 10, &, 14 weeks	None	0.893855	0.95	0.97	0.97	NA	NA	5-17mo	0 yrs	None	0.5	0.69	0.85	0.85	NA	NA	None	NA	NA	NA	NA	NA	NA	NA	NA	0.4	Cases per 100,000 population	109527	107702	107415	107516	108265	109342	110563	111772	113293	114371	115509	116605	117323	118153	118661
102	PEV (Pre-Erythrocytic Vaccine)	3	0.35	10	100	Infants	6, 10, &, 14 weeks	None	0.893855	0.95	0.97	0.97	NA	NA	5-17mo	0 yrs	None	0.5	0.69	0.85	0.85	NA	NA	None	NA	NA	NA	NA	NA	NA	NA	NA	0.4	Severe Cases per 100,000 population	1414.94	1455.06	1482.06	1540.25	1583.88	1617.62	1643.44	1650.69	1660.62	1679.19	1665	1658.06	1691.75	1658.81	1686.75
102	PEV (Pre-Erythrocytic Vaccine)	3	0.35	10	100	Infants	6, 10, &, 14 weeks	None	0.893855	0.95	0.97	0.97	NA	NA	5-17mo	0 yrs	None	0.5	0.69	0.85	0.85	NA	NA	None	NA	NA	NA	NA	NA	NA	NA	NA	0.4	Deaths per 100,000 population	345.125	343.625	343.5	348.75	354.5	358.062	363	368.562	367.5	366.875	369.125	372.5	375.062	374.125	380
102	PEV (Pre-Erythrocytic Vaccine)	3	0.35	10	100	Infants	6, 10, &, 14 weeks	None	0.893855	0.95	0.97	0.97	NA	NA	5-17mo	0 yrs	None	0.5	0.69	0.85	0.85	NA	NA	None	NA	NA	NA	NA	NA	NA	NA	NA	0.4	Cases in <5yo per 100,000 population	50699.6	48971.8	48621.6	48655.1	48901.8	49025.5	49040.4	49027.1	49158.8	49088.9	49072.9	49189.6	49166.7	49266.6	49244.8
102	PEV (Pre-Erythrocytic Vaccine)	3	0.35	10	100	Infants	6, 10, &, 14 weeks	None	0.893855	0.95	0.97	0.97	NA	NA	5-17mo	0 yrs	None	0.5	0.69	0.85	0.85	NA	NA	None	NA	NA	NA	NA	NA	NA	NA	NA	0.4	Severe Cases in <5yo per 100,000 population	1296.19	1331.88	1362	1427.12	1451.31	1464.06	1477.94	1466.69	1466.12	1476.5	1461	1450.44	1486.12	1461.94	1478.5
102	PEV (Pre-Erythrocytic Vaccine)	3	0.35	10	100	Infants	6, 10, &, 14 weeks	None	0.893855	0.95	0.97	0.97	NA	NA	5-17mo	0 yrs	None	0.5	0.69	0.85	0.85	NA	NA	None	NA	NA	NA	NA	NA	NA	NA	NA	0.4	Deaths in < 5yo per 100,000 population	314.375	310.812	311.438	316.938	320.75	321.75	323.562	327.5	321.625	321.312	323.375	323.438	325.5	326.125	327.75
102	PEV (Pre-Erythrocytic Vaccine)	3	0.35	10	100	Infants	6, 10, &, 14 weeks	None	0.893855	0.95	0.97	0.97	NA	NA	5-17mo	0 yrs	None	0.5	0.69	0.85	0.85	NA	NA	None	NA	NA	NA	NA	NA	NA	NA	NA	0.4	DALYs per 100,000 population	9314.9	9252.34	9254.03	9397.11	9581.95	9674.77	9799.38	9959.58	9929.64	9878.66	9977.17	10066.9	10135.8	10120.7	10256.1
102	PEV (Pre-Erythrocytic Vaccine)	3	0.35	10	100	Infants	6, 10, &, 14 weeks	None	0.893855	0.95	0.97	0.97	NA	NA	5-17mo	0 yrs	None	0.5	0.69	0.85	0.85	NA	NA	None	NA	NA	NA	NA	NA	NA	NA	NA	0.4	Income and productivity gains from delivering vaccine (US$ / dose)	0.228357	0.510799	0.522315	0.482672	0.312164	0.0643053	-0.227227	-0.502961	-0.838003	-1.09983	-1.33266	-1.57236	-1.74724	-1.90628	-2.03879
103	PEV (Pre-Erythrocytic Vaccine)	3	0.35	10	100	Infants	6, 10, &, 14 weeks	None	0.700569	0.81	0.93	0.93	NA	NA	5-17mo	0 yrs	None	0.89	0.95	0.97	0.97	NA	NA	None	NA	NA	NA	NA	NA	NA	NA	NA	0.4	Cases per 100,000 population	109208	107974	107981	108277	109168	110285	111321	112443	113424	114638	115311	116047	116676	117207	117735
103	PEV (Pre-Erythrocytic Vaccine)	3	0.35	10	100	Infants	6, 10, &, 14 weeks	None	0.700569	0.81	0.93	0.93	NA	NA	5-17mo	0 yrs	None	0.89	0.95	0.97	0.97	NA	NA	None	NA	NA	NA	NA	NA	NA	NA	NA	0.4	Severe Cases per 100,000 population	1420.59	1458.12	1505.94	1553.18	1587.76	1612.71	1622.82	1632.41	1653.59	1643.12	1624	1658.53	1658.59	1645.29	1658.24
103	PEV (Pre-Erythrocytic Vaccine)	3	0.35	10	100	Infants	6, 10, &, 14 weeks	None	0.700569	0.81	0.93	0.93	NA	NA	5-17mo	0 yrs	None	0.89	0.95	0.97	0.97	NA	NA	None	NA	NA	NA	NA	NA	NA	NA	NA	0.4	Deaths per 100,000 population	344	339.529	346.176	353.529	366.294	361.412	365.706	372.353	371.471	368.471	367.529	372.765	375.706	373.176	380.647
103	PEV (Pre-Erythrocytic Vaccine)	3	0.35	10	100	Infants	6, 10, &, 14 weeks	None	0.700569	0.81	0.93	0.93	NA	NA	5-17mo	0 yrs	None	0.89	0.95	0.97	0.97	NA	NA	None	NA	NA	NA	NA	NA	NA	NA	NA	0.4	Cases in <5yo per 100,000 population	50471	49235.1	49176.3	49497.1	49659.7	49913.5	49928.5	49930.3	49878.9	50057.6	49953.3	49907.1	49984.6	50011.6	49958.4
103	PEV (Pre-Erythrocytic Vaccine)	3	0.35	10	100	Infants	6, 10, &, 14 weeks	None	0.700569	0.81	0.93	0.93	NA	NA	5-17mo	0 yrs	None	0.89	0.95	0.97	0.97	NA	NA	None	NA	NA	NA	NA	NA	NA	NA	NA	0.4	Severe Cases in <5yo per 100,000 population	1307.88	1337.82	1386.06	1433.53	1453.18	1463.53	1459.59	1458.59	1467.18	1453.76	1440.82	1469.18	1466	1451.18	1464.06
103	PEV (Pre-Erythrocytic Vaccine)	3	0.35	10	100	Infants	6, 10, &, 14 weeks	None	0.700569	0.81	0.93	0.93	NA	NA	5-17mo	0 yrs	None	0.89	0.95	0.97	0.97	NA	NA	None	NA	NA	NA	NA	NA	NA	NA	NA	0.4	Deaths in < 5yo per 100,000 population	312.471	306.353	315.529	323.706	329	325.118	327.765	332.471	326.882	325.824	324.706	327.412	332.765	327.529	334.118
103	PEV (Pre-Erythrocytic Vaccine)	3	0.35	10	100	Infants	6, 10, &, 14 weeks	None	0.700569	0.81	0.93	0.93	NA	NA	5-17mo	0 yrs	None	0.89	0.95	0.97	0.97	NA	NA	None	NA	NA	NA	NA	NA	NA	NA	NA	0.4	DALYs per 100,000 population	9297.5	9172.34	9344.66	9540.31	9870.52	9738.16	9881.7	10053.9	10031	9953.01	9930.6	10058.4	10145.7	10072.8	10253.5
103	PEV (Pre-Erythrocytic Vaccine)	3	0.35	10	100	Infants	6, 10, &, 14 weeks	None	0.700569	0.81	0.93	0.93	NA	NA	5-17mo	0 yrs	None	0.89	0.95	0.97	0.97	NA	NA	None	NA	NA	NA	NA	NA	NA	NA	NA	0.4	Income and productivity gains from delivering vaccine (US$ / dose)	0.276502	0.577585	0.540432	0.473189	0.23956	-0.0561391	-0.348595	-0.652256	-0.943448	-1.25366	-1.41914	-1.65441	-1.81334	-1.92655	-2.09513
104	PEV (Pre-Erythrocytic Vaccine)	3	0.35	10	100	Infants	6, 10, &, 14 weeks	None	0.700569	0.81	0.93	0.93	NA	NA	5-17mo	0 yrs	None	0.7	0.81	0.93	0.93	NA	NA	None	NA	NA	NA	NA	NA	NA	NA	NA	0.4	Cases per 100,000 population	109346	108062	108095	108469	109213	110252	111244	112383	113431	114491	115322	115984	116725	117176	117576
104	PEV (Pre-Erythrocytic Vaccine)	3	0.35	10	100	Infants	6, 10, &, 14 weeks	None	0.700569	0.81	0.93	0.93	NA	NA	5-17mo	0 yrs	None	0.7	0.81	0.93	0.93	NA	NA	None	NA	NA	NA	NA	NA	NA	NA	NA	0.4	Severe Cases per 100,000 population	1444.29	1468.88	1530.59	1566.76	1581	1614	1634.18	1639.82	1633.59	1636.82	1654.24	1656.35	1652.65	1644.12	1655
104	PEV (Pre-Erythrocytic Vaccine)	3	0.35	10	100	Infants	6, 10, &, 14 weeks	None	0.700569	0.81	0.93	0.93	NA	NA	5-17mo	0 yrs	None	0.7	0.81	0.93	0.93	NA	NA	None	NA	NA	NA	NA	NA	NA	NA	NA	0.4	Deaths per 100,000 population	350.706	347.294	352.706	353.059	358.647	364.647	362.765	366.824	364.529	375.059	367.706	358.647	376.941	376.647	374.353
104	PEV (Pre-Erythrocytic Vaccine)	3	0.35	10	100	Infants	6, 10, &, 14 weeks	None	0.700569	0.81	0.93	0.93	NA	NA	5-17mo	0 yrs	None	0.7	0.81	0.93	0.93	NA	NA	None	NA	NA	NA	NA	NA	NA	NA	NA	0.4	Cases in <5yo per 100,000 population	50654.5	49303.3	49277.5	49573.3	49699	49922.9	49816.8	49847.1	49822.5	49949.2	49940.1	49912.4	50019.7	49956.9	49954
104	PEV (Pre-Erythrocytic Vaccine)	3	0.35	10	100	Infants	6, 10, &, 14 weeks	None	0.700569	0.81	0.93	0.93	NA	NA	5-17mo	0 yrs	None	0.7	0.81	0.93	0.93	NA	NA	None	NA	NA	NA	NA	NA	NA	NA	NA	0.4	Severe Cases in <5yo per 100,000 population	1327	1349.65	1408.12	1443.12	1452.59	1460.18	1469.65	1466.12	1454.88	1456.35	1461.76	1470.35	1460.59	1449.71	1466.29
104	PEV (Pre-Erythrocytic Vaccine)	3	0.35	10	100	Infants	6, 10, &, 14 weeks	None	0.700569	0.81	0.93	0.93	NA	NA	5-17mo	0 yrs	None	0.7	0.81	0.93	0.93	NA	NA	None	NA	NA	NA	NA	NA	NA	NA	NA	0.4	Deaths in < 5yo per 100,000 population	320.882	315	322.353	321.118	325.588	325.588	322.588	325.706	322.824	331.412	322.882	317.588	331.706	329.765	327.176
104	PEV (Pre-Erythrocytic Vaccine)	3	0.35	10	100	Infants	6, 10, &, 14 weeks	None	0.700569	0.81	0.93	0.93	NA	NA	5-17mo	0 yrs	None	0.7	0.81	0.93	0.93	NA	NA	None	NA	NA	NA	NA	NA	NA	NA	NA	0.4	DALYs per 100,000 population	9444.48	9372.73	9516.58	9507.98	9682.83	9841.81	9788.1	9917.71	9840.29	10105.5	9929.92	9719.03	10176.2	10179.6	10094.3
104	PEV (Pre-Erythrocytic Vaccine)	3	0.35	10	100	Infants	6, 10, &, 14 weeks	None	0.700569	0.81	0.93	0.93	NA	NA	5-17mo	0 yrs	None	0.7	0.81	0.93	0.93	NA	NA	None	NA	NA	NA	NA	NA	NA	NA	NA	0.4	Income and productivity gains from delivering vaccine (US$ / dose)	0.263514	0.560305	0.512748	0.438114	0.243104	-0.0567331	-0.345746	-0.662842	-0.947524	-1.21898	-1.45264	-1.64432	-1.82268	-1.92361	-2.06016
105	PEV (Pre-Erythrocytic Vaccine)	3	0.35	10	100	Infants	6, 10, &, 14 weeks	None	0.700569	0.81	0.93	0.93	NA	NA	5-17mo	0 yrs	None	0.5	0.69	0.85	0.85	NA	NA	None	NA	NA	NA	NA	NA	NA	NA	NA	0.4	Cases per 100,000 population	109609	108294	108134	108387	109137	109977	111147	112211	113326	114293	115198	115868	116560	117114	117522
105	PEV (Pre-Erythrocytic Vaccine)	3	0.35	10	100	Infants	6, 10, &, 14 weeks	None	0.700569	0.81	0.93	0.93	NA	NA	5-17mo	0 yrs	None	0.5	0.69	0.85	0.85	NA	NA	None	NA	NA	NA	NA	NA	NA	NA	NA	0.4	Severe Cases per 100,000 population	1438.47	1455.41	1508.77	1550.82	1579.88	1608.38	1627.73	1630.18	1647.69	1646.83	1652.61	1651.69	1650.04	1642.78	1650.61
105	PEV (Pre-Erythrocytic Vaccine)	3	0.35	10	100	Infants	6, 10, &, 14 weeks	None	0.700569	0.81	0.93	0.93	NA	NA	5-17mo	0 yrs	None	0.5	0.69	0.85	0.85	NA	NA	None	NA	NA	NA	NA	NA	NA	NA	NA	0.4	Deaths per 100,000 population	351.509	341.118	350.727	351.164	361.873	365.164	364.364	369.155	371	369.827	367.836	374.6	374.745	371.845	370.945
105	PEV (Pre-Erythrocytic Vaccine)	3	0.35	10	100	Infants	6, 10, &, 14 weeks	None	0.700569	0.81	0.93	0.93	NA	NA	5-17mo	0 yrs	None	0.5	0.69	0.85	0.85	NA	NA	None	NA	NA	NA	NA	NA	NA	NA	NA	0.4	Cases in <5yo per 100,000 population	50850.7	49530.6	49344.4	49534.3	49731.7	49805.5	49851.4	49862.6	49901.4	49901.5	49930.1	49890.3	49961.1	49971.2	49959.2
105	PEV (Pre-Erythrocytic Vaccine)	3	0.35	10	100	Infants	6, 10, &, 14 weeks	None	0.700569	0.81	0.93	0.93	NA	NA	5-17mo	0 yrs	None	0.5	0.69	0.85	0.85	NA	NA	None	NA	NA	NA	NA	NA	NA	NA	NA	0.4	Severe Cases in <5yo per 100,000 population	1320.35	1338.59	1392.04	1432.86	1446.17	1462.1	1465.29	1456.76	1466.33	1463.46	1464.8	1464.65	1459.46	1453.75	1459.75
105	PEV (Pre-Erythrocytic Vaccine)	3	0.35	10	100	Infants	6, 10, &, 14 weeks	None	0.700569	0.81	0.93	0.93	NA	NA	5-17mo	0 yrs	None	0.5	0.69	0.85	0.85	NA	NA	None	NA	NA	NA	NA	NA	NA	NA	NA	0.4	Deaths in < 5yo per 100,000 population	319.182	310.191	319.209	319.918	327.6	328.327	325.373	327.345	328.318	327.118	323.891	329.791	327.664	326.727	325.127
105	PEV (Pre-Erythrocytic Vaccine)	3	0.35	10	100	Infants	6, 10, &, 14 weeks	None	0.700569	0.81	0.93	0.93	NA	NA	5-17mo	0 yrs	None	0.5	0.69	0.85	0.85	NA	NA	None	NA	NA	NA	NA	NA	NA	NA	NA	0.4	DALYs per 100,000 population	9474.71	9197.56	9459.45	9470.47	9750.37	9852.58	9839.76	9961.82	10016.5	9996.73	9941.8	10107.9	10120.6	10042.1	10036.2
105	PEV (Pre-Erythrocytic Vaccine)	3	0.35	10	100	Infants	6, 10, &, 14 weeks	None	0.700569	0.81	0.93	0.93	NA	NA	5-17mo	0 yrs	None	0.5	0.69	0.85	0.85	NA	NA	None	NA	NA	NA	NA	NA	NA	NA	NA	0.4	Income and productivity gains from delivering vaccine (US$ / dose)	0.248686	0.534775	0.516718	0.45981	0.25715	0.0158359	-0.306827	-0.599666	-0.905172	-1.17572	-1.40519	-1.59908	-1.77661	-1.92094	-2.04732
106	PEV (Pre-Erythrocytic Vaccine)	3	0.35	10	100	Infants	6, 10, &, 14 weeks	None	0.498525	0.69	0.85	0.85	NA	NA	5-17mo	0 yrs	None	0.89	0.95	0.97	0.97	NA	NA	None	NA	NA	NA	NA	NA	NA	NA	NA	0.4	Cases per 100,000 population	109393	108449	108832	109325	109945	110947	111740	112730	113507	114285	114860	115445	115914	116223	116561
106	PEV (Pre-Erythrocytic Vaccine)	3	0.35	10	100	Infants	6, 10, &, 14 weeks	None	0.498525	0.69	0.85	0.85	NA	NA	5-17mo	0 yrs	None	0.89	0.95	0.97	0.97	NA	NA	None	NA	NA	NA	NA	NA	NA	NA	NA	0.4	Severe Cases per 100,000 population	1412.94	1470.17	1523.56	1555.89	1575.67	1601.06	1616.78	1631.83	1637.39	1626.22	1614.89	1615.28	1638.89	1616.83	1610.22
106	PEV (Pre-Erythrocytic Vaccine)	3	0.35	10	100	Infants	6, 10, &, 14 weeks	None	0.498525	0.69	0.85	0.85	NA	NA	5-17mo	0 yrs	None	0.89	0.95	0.97	0.97	NA	NA	None	NA	NA	NA	NA	NA	NA	NA	NA	0.4	Deaths per 100,000 population	341.722	351.333	360.611	356.778	367.278	369	358.889	371.167	373.111	373.333	366.944	371.722	373	360	368.278
106	PEV (Pre-Erythrocytic Vaccine)	3	0.35	10	100	Infants	6, 10, &, 14 weeks	None	0.498525	0.69	0.85	0.85	NA	NA	5-17mo	0 yrs	None	0.89	0.95	0.97	0.97	NA	NA	None	NA	NA	NA	NA	NA	NA	NA	NA	0.4	Cases in <5yo per 100,000 population	50639	49726.3	50000.6	50470.1	50535.4	50648.5	50561.4	50684.4	50613.9	50696.3	50610.6	50706.9	50753.8	50676.4	50683.4
106	PEV (Pre-Erythrocytic Vaccine)	3	0.35	10	100	Infants	6, 10, &, 14 weeks	None	0.498525	0.69	0.85	0.85	NA	NA	5-17mo	0 yrs	None	0.89	0.95	0.97	0.97	NA	NA	None	NA	NA	NA	NA	NA	NA	NA	NA	0.4	Severe Cases in <5yo per 100,000 population	1301.83	1353.06	1409.11	1434.39	1444	1450.44	1456.22	1464.5	1464.56	1457.89	1450.67	1439.11	1460.22	1440	1436.78
106	PEV (Pre-Erythrocytic Vaccine)	3	0.35	10	100	Infants	6, 10, &, 14 weeks	None	0.498525	0.69	0.85	0.85	NA	NA	5-17mo	0 yrs	None	0.89	0.95	0.97	0.97	NA	NA	None	NA	NA	NA	NA	NA	NA	NA	NA	0.4	Deaths in < 5yo per 100,000 population	312.778	317.389	331	325.556	332	330.556	321.833	331.611	331.389	333.5	327.278	328.111	331.278	320.222	328.333
106	PEV (Pre-Erythrocytic Vaccine)	3	0.35	10	100	Infants	6, 10, &, 14 weeks	None	0.498525	0.69	0.85	0.85	NA	NA	5-17mo	0 yrs	None	0.89	0.95	0.97	0.97	NA	NA	None	NA	NA	NA	NA	NA	NA	NA	NA	0.4	DALYs per 100,000 population	9202.7	9466.32	9726.78	9630.52	9878.22	9960	9688.8	10025.5	10081.6	10072.6	9913.42	10038.1	10080.4	9712.86	9943.58
106	PEV (Pre-Erythrocytic Vaccine)	3	0.35	10	100	Infants	6, 10, &, 14 weeks	None	0.498525	0.69	0.85	0.85	NA	NA	5-17mo	0 yrs	None	0.89	0.95	0.97	0.97	NA	NA	None	NA	NA	NA	NA	NA	NA	NA	NA	0.4	Income and productivity gains from delivering vaccine (US$ / dose)	0.293703	0.630644	0.512332	0.407722	0.188564	-0.170643	-0.45464	-0.793295	-1.07512	-1.3168	-1.51383	-1.70485	-1.8687	-1.96341	-2.08571
107	PEV (Pre-Erythrocytic Vaccine)	3	0.35	10	100	Infants	6, 10, &, 14 weeks	None	0.498525	0.69	0.85	0.85	NA	NA	5-17mo	0 yrs	None	0.7	0.81	0.93	0.93	NA	NA	None	NA	NA	NA	NA	NA	NA	NA	NA	0.4	Cases per 100,000 population	109541	108674	108705	109227	109907	110918	111701	112554	113339	114155	114784	115411	115873	116067	116447
107	PEV (Pre-Erythrocytic Vaccine)	3	0.35	10	100	Infants	6, 10, &, 14 weeks	None	0.498525	0.69	0.85	0.85	NA	NA	5-17mo	0 yrs	None	0.7	0.81	0.93	0.93	NA	NA	None	NA	NA	NA	NA	NA	NA	NA	NA	0.4	Severe Cases per 100,000 population	1434.62	1478.31	1529.19	1565.56	1573.88	1587.12	1609.38	1618.75	1620.25	1638.31	1615.25	1619.88	1607.06	1607.81	1625.81
107	PEV (Pre-Erythrocytic Vaccine)	3	0.35	10	100	Infants	6, 10, &, 14 weeks	None	0.498525	0.69	0.85	0.85	NA	NA	5-17mo	0 yrs	None	0.7	0.81	0.93	0.93	NA	NA	None	NA	NA	NA	NA	NA	NA	NA	NA	0.4	Deaths per 100,000 population	351	346.75	356.688	357.25	349.562	369.688	369.75	360.312	362.25	369.312	377.188	378.125	373.875	372.188	378.062
107	PEV (Pre-Erythrocytic Vaccine)	3	0.35	10	100	Infants	6, 10, &, 14 weeks	None	0.498525	0.69	0.85	0.85	NA	NA	5-17mo	0 yrs	None	0.7	0.81	0.93	0.93	NA	NA	None	NA	NA	NA	NA	NA	NA	NA	NA	0.4	Cases in <5yo per 100,000 population	50806.2	49949.7	49915.3	50409.2	50457.1	50645.5	50655.1	50652	50590.5	50687.6	50735.2	50717.1	50756.3	50622.2	50702.8
107	PEV (Pre-Erythrocytic Vaccine)	3	0.35	10	100	Infants	6, 10, &, 14 weeks	None	0.498525	0.69	0.85	0.85	NA	NA	5-17mo	0 yrs	None	0.7	0.81	0.93	0.93	NA	NA	None	NA	NA	NA	NA	NA	NA	NA	NA	0.4	Severe Cases in <5yo per 100,000 population	1313	1362.75	1405.69	1444.19	1441.56	1446.12	1451.94	1455.06	1454.69	1467.81	1443.69	1449.5	1431.94	1433.75	1452.44
107	PEV (Pre-Erythrocytic Vaccine)	3	0.35	10	100	Infants	6, 10, &, 14 weeks	None	0.498525	0.69	0.85	0.85	NA	NA	5-17mo	0 yrs	None	0.7	0.81	0.93	0.93	NA	NA	None	NA	NA	NA	NA	NA	NA	NA	NA	0.4	Deaths in < 5yo per 100,000 population	318.5	316.562	323.25	325.125	316.125	332.875	329.375	320.25	323.375	329.188	336.438	336	329.625	330.312	333.312
107	PEV (Pre-Erythrocytic Vaccine)	3	0.35	10	100	Infants	6, 10, &, 14 weeks	None	0.498525	0.69	0.85	0.85	NA	NA	5-17mo	0 yrs	None	0.7	0.81	0.93	0.93	NA	NA	None	NA	NA	NA	NA	NA	NA	NA	NA	0.4	DALYs per 100,000 population	9461.13	9355.72	9604.93	9658.76	9450.57	9968.86	9976.91	9752.16	9797.57	9987.44	10190.9	10218.9	10089.3	10057.2	10175.1
107	PEV (Pre-Erythrocytic Vaccine)	3	0.35	10	100	Infants	6, 10, &, 14 weeks	None	0.498525	0.69	0.85	0.85	NA	NA	5-17mo	0 yrs	None	0.7	0.81	0.93	0.93	NA	NA	None	NA	NA	NA	NA	NA	NA	NA	NA	0.4	Income and productivity gains from delivering vaccine (US$ / dose)	0.279291	0.58727	0.536283	0.439253	0.185571	-0.135691	-0.419682	-0.728721	-1.00933	-1.29845	-1.44963	-1.70299	-1.84435	-1.91887	-2.04788
108	PEV (Pre-Erythrocytic Vaccine)	3	0.35	10	100	Infants	6, 10, &, 14 weeks	None	0.498525	0.69	0.85	0.85	NA	NA	5-17mo	0 yrs	None	0.5	0.69	0.85	0.85	NA	NA	None	NA	NA	NA	NA	NA	NA	NA	NA	0.4	Cases per 100,000 population	109790	108870	108760	109223	109823	110701	111632	112431	113349	114163	114704	115255	115702	116143	116539
108	PEV (Pre-Erythrocytic Vaccine)	3	0.35	10	100	Infants	6, 10, &, 14 weeks	None	0.498525	0.69	0.85	0.85	NA	NA	5-17mo	0 yrs	None	0.5	0.69	0.85	0.85	NA	NA	None	NA	NA	NA	NA	NA	NA	NA	NA	0.4	Severe Cases per 100,000 population	1448.41	1477.24	1534.88	1541.82	1571.88	1597.12	1607.18	1618.41	1605.65	1621.94	1640.53	1629.24	1635	1620.71	1631.41
108	PEV (Pre-Erythrocytic Vaccine)	3	0.35	10	100	Infants	6, 10, &, 14 weeks	None	0.498525	0.69	0.85	0.85	NA	NA	5-17mo	0 yrs	None	0.5	0.69	0.85	0.85	NA	NA	None	NA	NA	NA	NA	NA	NA	NA	NA	0.4	Deaths per 100,000 population	345.941	352.471	364.059	356.471	362.941	356.588	363.118	367.647	369.765	370.765	381.765	381.765	375.529	373.294	370.118
108	PEV (Pre-Erythrocytic Vaccine)	3	0.35	10	100	Infants	6, 10, &, 14 weeks	None	0.498525	0.69	0.85	0.85	NA	NA	5-17mo	0 yrs	None	0.5	0.69	0.85	0.85	NA	NA	None	NA	NA	NA	NA	NA	NA	NA	NA	0.4	Cases in <5yo per 100,000 population	50969.5	50070.9	50025.9	50413.6	50441.5	50575.4	50657.8	50652.7	50657.7	50810.8	50691.8	50749.8	50645.1	50702.5	50711.7
108	PEV (Pre-Erythrocytic Vaccine)	3	0.35	10	100	Infants	6, 10, &, 14 weeks	None	0.498525	0.69	0.85	0.85	NA	NA	5-17mo	0 yrs	None	0.5	0.69	0.85	0.85	NA	NA	None	NA	NA	NA	NA	NA	NA	NA	NA	0.4	Severe Cases in <5yo per 100,000 population	1330.88	1358.82	1418.59	1425.18	1433.65	1454	1452.06	1456.76	1437.88	1456.06	1469.47	1457.06	1460.53	1450.71	1455.53
108	PEV (Pre-Erythrocytic Vaccine)	3	0.35	10	100	Infants	6, 10, &, 14 weeks	None	0.498525	0.69	0.85	0.85	NA	NA	5-17mo	0 yrs	None	0.5	0.69	0.85	0.85	NA	NA	None	NA	NA	NA	NA	NA	NA	NA	NA	0.4	Deaths in < 5yo per 100,000 population	314.882	320.647	332.529	325.353	328.294	322.529	324.529	325.765	330.706	329.294	338.471	338.647	334.235	329.765	326.176
108	PEV (Pre-Erythrocytic Vaccine)	3	0.35	10	100	Infants	6, 10, &, 14 weeks	None	0.498525	0.69	0.85	0.85	NA	NA	5-17mo	0 yrs	None	0.5	0.69	0.85	0.85	NA	NA	None	NA	NA	NA	NA	NA	NA	NA	NA	0.4	DALYs per 100,000 population	9339.11	9511.95	9812.36	9623.99	9794.48	9642.94	9811.51	9927.75	9989.18	9989.32	10289.9	10290.5	10155.3	10065.7	10004.3
108	PEV (Pre-Erythrocytic Vaccine)	3	0.35	10	100	Infants	6, 10, &, 14 weeks	None	0.498525	0.69	0.85	0.85	NA	NA	5-17mo	0 yrs	None	0.5	0.69	0.85	0.85	NA	NA	None	NA	NA	NA	NA	NA	NA	NA	NA	0.4	Income and productivity gains from delivering vaccine (US$ / dose)	0.252229	0.5354	0.521611	0.446393	0.210689	-0.0942785	-0.403078	-0.688316	-0.993396	-1.25875	-1.46366	-1.64009	-1.80654	-1.93146	-2.08322
109	PEV (Pre-Erythrocytic Vaccine)	3	0.5	2	0.1	Infants	6, 10, &, 14 weeks	None	0.893855	0.95	0.97	0.97	NA	NA	5-17mo	0 yrs	None	0.89	0.95	0.97	0.97	NA	NA	None	NA	NA	NA	NA	NA	NA	NA	NA	0.55	Cases per 100,000 population	8526.72	8475.92	8478.15	8314.35	8308.01	8354.03	8263.53	8266.54	8184.35	8144.57	8123.27	8138.67	8173.6	8194.75	8168.72
109	PEV (Pre-Erythrocytic Vaccine)	3	0.5	2	0.1	Infants	6, 10, &, 14 weeks	None	0.893855	0.95	0.97	0.97	NA	NA	5-17mo	0 yrs	None	0.89	0.95	0.97	0.97	NA	NA	None	NA	NA	NA	NA	NA	NA	NA	NA	0.55	Severe Cases per 100,000 population	150.655	144.255	143.918	141.336	140.364	142.355	141.845	140.282	140.009	139.727	140.491	137.391	144.427	142.255	142.627
109	PEV (Pre-Erythrocytic Vaccine)	3	0.5	2	0.1	Infants	6, 10, &, 14 weeks	None	0.893855	0.95	0.97	0.97	NA	NA	5-17mo	0 yrs	None	0.89	0.95	0.97	0.97	NA	NA	None	NA	NA	NA	NA	NA	NA	NA	NA	0.55	Deaths per 100,000 population	30.1727	29.5545	30.1273	29.6	29.1455	29.2636	29.0818	29.6636	29.0273	28.5455	30.3182	29.2545	29.5455	29.0636	29.4364
109	PEV (Pre-Erythrocytic Vaccine)	3	0.5	2	0.1	Infants	6, 10, &, 14 weeks	None	0.893855	0.95	0.97	0.97	NA	NA	5-17mo	0 yrs	None	0.89	0.95	0.97	0.97	NA	NA	None	NA	NA	NA	NA	NA	NA	NA	NA	0.55	Cases in <5yo per 100,000 population	646.082	587.091	567.345	529.436	537.664	533.145	529.127	529.455	522.045	520.609	517.164	515.836	518.827	518.845	519.718
109	PEV (Pre-Erythrocytic Vaccine)	3	0.5	2	0.1	Infants	6, 10, &, 14 weeks	None	0.893855	0.95	0.97	0.97	NA	NA	5-17mo	0 yrs	None	0.89	0.95	0.97	0.97	NA	NA	None	NA	NA	NA	NA	NA	NA	NA	NA	0.55	Severe Cases in <5yo per 100,000 population	33.1182	29.6091	28.8273	28.0273	27.4545	27.5727	27.0364	26.9636	27.2727	26.8364	27.0909	26.6273	28.0091	26.2727	27.3182
109	PEV (Pre-Erythrocytic Vaccine)	3	0.5	2	0.1	Infants	6, 10, &, 14 weeks	None	0.893855	0.95	0.97	0.97	NA	NA	5-17mo	0 yrs	None	0.89	0.95	0.97	0.97	NA	NA	None	NA	NA	NA	NA	NA	NA	NA	NA	0.55	Deaths in < 5yo per 100,000 population	7.68182	7.40909	7.35455	7.31818	7.06364	6.89091	6.51818	7.5	7.1	7.20909	7.34545	7.32727	7.02727	6.58182	7.30909
109	PEV (Pre-Erythrocytic Vaccine)	3	0.5	2	0.1	Infants	6, 10, &, 14 weeks	None	0.893855	0.95	0.97	0.97	NA	NA	5-17mo	0 yrs	None	0.89	0.95	0.97	0.97	NA	NA	None	NA	NA	NA	NA	NA	NA	NA	NA	0.55	DALYs per 100,000 population	769.595	754.045	762.323	752.064	738.411	743.96	738.169	750.176	737.375	731.59	771.629	744.263	752.843	738.498	750.104
109	PEV (Pre-Erythrocytic Vaccine)	3	0.5	2	0.1	Infants	6, 10, &, 14 weeks	None	0.893855	0.95	0.97	0.97	NA	NA	5-17mo	0 yrs	None	0.89	0.95	0.97	0.97	NA	NA	None	NA	NA	NA	NA	NA	NA	NA	NA	0.55	Income and productivity gains from delivering vaccine (US$ / dose)	0.0067421	0.0201536	0.0191912	0.0518848	0.0565529	0.0451489	0.0635034	0.0625755	0.0781893	0.0872506	0.0942476	0.092132	0.0808664	0.0756058	0.0829511
110	PEV (Pre-Erythrocytic Vaccine)	3	0.5	2	0.1	Infants	6, 10, &, 14 weeks	None	0.893855	0.95	0.97	0.97	NA	NA	5-17mo	0 yrs	None	0.7	0.81	0.93	0.93	NA	NA	None	NA	NA	NA	NA	NA	NA	NA	NA	0.55	Cases per 100,000 population	8600.13	8466.95	8422.73	8320.75	8265.66	8292.03	8295.3	8242.92	8191.57	8189.95	8237.7	8178.93	8142.45	8150.49	8126.64
110	PEV (Pre-Erythrocytic Vaccine)	3	0.5	2	0.1	Infants	6, 10, &, 14 weeks	None	0.893855	0.95	0.97	0.97	NA	NA	5-17mo	0 yrs	None	0.7	0.81	0.93	0.93	NA	NA	None	NA	NA	NA	NA	NA	NA	NA	NA	0.55	Severe Cases per 100,000 population	149.518	144.7	142.164	141.709	140.745	140.973	142.245	140.045	141.509	138.636	141.673	142.827	139.255	142.264	141.991
110	PEV (Pre-Erythrocytic Vaccine)	3	0.5	2	0.1	Infants	6, 10, &, 14 weeks	None	0.893855	0.95	0.97	0.97	NA	NA	5-17mo	0 yrs	None	0.7	0.81	0.93	0.93	NA	NA	None	NA	NA	NA	NA	NA	NA	NA	NA	0.55	Deaths per 100,000 population	30.7909	30.0545	29.4	29.0545	29.7727	29.3727	29.3364	29.0364	29.9636	28.5727	29.6909	29.4909	29.8273	28.9364	29.8909
110	PEV (Pre-Erythrocytic Vaccine)	3	0.5	2	0.1	Infants	6, 10, &, 14 weeks	None	0.893855	0.95	0.97	0.97	NA	NA	5-17mo	0 yrs	None	0.7	0.81	0.93	0.93	NA	NA	None	NA	NA	NA	NA	NA	NA	NA	NA	0.55	Cases in <5yo per 100,000 population	653.591	589.2	562.618	537.491	529.282	529.064	526.664	526.1	516.455	524.9	523.145	523.682	516.855	515.455	513.045
110	PEV (Pre-Erythrocytic Vaccine)	3	0.5	2	0.1	Infants	6, 10, &, 14 weeks	None	0.893855	0.95	0.97	0.97	NA	NA	5-17mo	0 yrs	None	0.7	0.81	0.93	0.93	NA	NA	None	NA	NA	NA	NA	NA	NA	NA	NA	0.55	Severe Cases in <5yo per 100,000 population	33.7091	30.0818	28.2091	28.0182	28.1091	27.7091	28.0091	28.4273	28.4	27.3545	26.8273	27.8636	27.0818	28.3364	27.2727
110	PEV (Pre-Erythrocytic Vaccine)	3	0.5	2	0.1	Infants	6, 10, &, 14 weeks	None	0.893855	0.95	0.97	0.97	NA	NA	5-17mo	0 yrs	None	0.7	0.81	0.93	0.93	NA	NA	None	NA	NA	NA	NA	NA	NA	NA	NA	0.55	Deaths in < 5yo per 100,000 population	8.18182	7.67273	7.08182	7	6.92727	6.87273	6.86364	7	7.35455	6.84545	7.1	7.37273	7.04545	7.03636	7.11818
110	PEV (Pre-Erythrocytic Vaccine)	3	0.5	2	0.1	Infants	6, 10, &, 14 weeks	None	0.893855	0.95	0.97	0.97	NA	NA	5-17mo	0 yrs	None	0.7	0.81	0.93	0.93	NA	NA	None	NA	NA	NA	NA	NA	NA	NA	NA	0.55	DALYs per 100,000 population	784.427	762.644	747.596	739.994	755.673	744.929	745.095	738.033	759.535	724.661	759.659	749.868	756.797	732.745	756.716
110	PEV (Pre-Erythrocytic Vaccine)	3	0.5	2	0.1	Infants	6, 10, &, 14 weeks	None	0.893855	0.95	0.97	0.97	NA	NA	5-17mo	0 yrs	None	0.7	0.81	0.93	0.93	NA	NA	None	NA	NA	NA	NA	NA	NA	NA	NA	0.55	Income and productivity gains from delivering vaccine (US$ / dose)	-0.00322506	0.0223415	0.0299405	0.0523935	0.0655288	0.0596957	0.0564013	0.0687909	0.0752157	0.0797062	0.0700117	0.0811165	0.0918278	0.0869154	0.0911049
111	PEV (Pre-Erythrocytic Vaccine)	3	0.5	2	0.1	Infants	6, 10, &, 14 weeks	None	0.893855	0.95	0.97	0.97	NA	NA	5-17mo	0 yrs	None	0.5	0.69	0.85	0.85	NA	NA	None	NA	NA	NA	NA	NA	NA	NA	NA	0.55	Cases per 100,000 population	8576.49	8398.9	8372.24	8329.38	8284.3	8260.75	8266.22	8298.81	8212.76	8173.75	8153.52	8122.65	8152.19	8196.94	8156.35
111	PEV (Pre-Erythrocytic Vaccine)	3	0.5	2	0.1	Infants	6, 10, &, 14 weeks	None	0.893855	0.95	0.97	0.97	NA	NA	5-17mo	0 yrs	None	0.5	0.69	0.85	0.85	NA	NA	None	NA	NA	NA	NA	NA	NA	NA	NA	0.55	Severe Cases per 100,000 population	150.618	145.145	142.682	140.955	142.036	141.582	141.464	142.345	142.7	140.227	139.645	139.882	142.082	142.791	144.582
111	PEV (Pre-Erythrocytic Vaccine)	3	0.5	2	0.1	Infants	6, 10, &, 14 weeks	None	0.893855	0.95	0.97	0.97	NA	NA	5-17mo	0 yrs	None	0.5	0.69	0.85	0.85	NA	NA	None	NA	NA	NA	NA	NA	NA	NA	NA	0.55	Deaths per 100,000 population	30.9273	30.8818	29.2545	28.7182	28.7818	29.5545	29.0909	29.7636	28.7455	28.8727	29.8182	28.1273	30.0818	30.2273	30.6273
111	PEV (Pre-Erythrocytic Vaccine)	3	0.5	2	0.1	Infants	6, 10, &, 14 weeks	None	0.893855	0.95	0.97	0.97	NA	NA	5-17mo	0 yrs	None	0.5	0.69	0.85	0.85	NA	NA	None	NA	NA	NA	NA	NA	NA	NA	NA	0.55	Cases in <5yo per 100,000 population	654.545	587.245	563.9	538.273	537.073	528.182	529.191	531.309	523.191	521.427	518.482	514.7	520.027	519.373	520.636
111	PEV (Pre-Erythrocytic Vaccine)	3	0.5	2	0.1	Infants	6, 10, &, 14 weeks	None	0.893855	0.95	0.97	0.97	NA	NA	5-17mo	0 yrs	None	0.5	0.69	0.85	0.85	NA	NA	None	NA	NA	NA	NA	NA	NA	NA	NA	0.55	Severe Cases in <5yo per 100,000 population	33.7455	31.0909	28.5	27.4545	27.7909	27.7818	27.6273	27.7636	28.1727	27.4091	26.6545	26.2273	26.9818	27.6818	27.9636
111	PEV (Pre-Erythrocytic Vaccine)	3	0.5	2	0.1	Infants	6, 10, &, 14 weeks	None	0.893855	0.95	0.97	0.97	NA	NA	5-17mo	0 yrs	None	0.5	0.69	0.85	0.85	NA	NA	None	NA	NA	NA	NA	NA	NA	NA	NA	0.55	Deaths in < 5yo per 100,000 population	7.80909	7.94545	6.82727	6.89091	6.95455	7.43636	6.71818	6.88182	6.72727	7.37273	7.15455	6.76364	7.26364	7.11818	7.11818
111	PEV (Pre-Erythrocytic Vaccine)	3	0.5	2	0.1	Infants	6, 10, &, 14 weeks	None	0.893855	0.95	0.97	0.97	NA	NA	5-17mo	0 yrs	None	0.5	0.69	0.85	0.85	NA	NA	None	NA	NA	NA	NA	NA	NA	NA	NA	0.55	DALYs per 100,000 population	788.752	784.046	740.983	728.9	732.372	749.571	740.437	755.254	730.031	736.659	756.24	716.948	765.27	766.388	778.917
111	PEV (Pre-Erythrocytic Vaccine)	3	0.5	2	0.1	Infants	6, 10, &, 14 weeks	None	0.893855	0.95	0.97	0.97	NA	NA	5-17mo	0 yrs	None	0.5	0.69	0.85	0.85	NA	NA	None	NA	NA	NA	NA	NA	NA	NA	NA	0.55	Income and productivity gains from delivering vaccine (US$ / dose)	0.000412936	0.0382509	0.0411641	0.05027	0.0614681	0.0654809	0.063697	0.0533818	0.0701341	0.0818889	0.0879373	0.0940642	0.087103	0.076503	0.0843299
112	PEV (Pre-Erythrocytic Vaccine)	3	0.5	2	0.1	Infants	6, 10, &, 14 weeks	None	0.700569	0.81	0.93	0.93	NA	NA	5-17mo	0 yrs	None	0.89	0.95	0.97	0.97	NA	NA	None	NA	NA	NA	NA	NA	NA	NA	NA	0.55	Cases per 100,000 population	8579.03	8477.33	8471.64	8417.18	8391.48	8340.51	8256.49	8282.85	8281.19	8274.8	8255.46	8229.86	8305.9	8315.14	8344.44
112	PEV (Pre-Erythrocytic Vaccine)	3	0.5	2	0.1	Infants	6, 10, &, 14 weeks	None	0.700569	0.81	0.93	0.93	NA	NA	5-17mo	0 yrs	None	0.89	0.95	0.97	0.97	NA	NA	None	NA	NA	NA	NA	NA	NA	NA	NA	0.55	Severe Cases per 100,000 population	146.436	146.036	143.945	142.955	142.155	143.727	141.782	140.418	141.945	143.764	142.055	142.136	145.809	145.1	144.864
112	PEV (Pre-Erythrocytic Vaccine)	3	0.5	2	0.1	Infants	6, 10, &, 14 weeks	None	0.700569	0.81	0.93	0.93	NA	NA	5-17mo	0 yrs	None	0.89	0.95	0.97	0.97	NA	NA	None	NA	NA	NA	NA	NA	NA	NA	NA	0.55	Deaths per 100,000 population	29.9364	30.2909	30.1182	29.8273	29.3091	29.9818	29.7727	29.8364	30.3636	29.7545	28.7	29.9091	30.0091	30.5909	30.5455
112	PEV (Pre-Erythrocytic Vaccine)	3	0.5	2	0.1	Infants	6, 10, &, 14 weeks	None	0.700569	0.81	0.93	0.93	NA	NA	5-17mo	0 yrs	None	0.89	0.95	0.97	0.97	NA	NA	None	NA	NA	NA	NA	NA	NA	NA	NA	0.55	Cases in <5yo per 100,000 population	648.291	594.6	581.391	565.464	568.018	556.027	547.964	553.773	557.327	557.809	553.982	551.7	558.418	559.827	550.882
112	PEV (Pre-Erythrocytic Vaccine)	3	0.5	2	0.1	Infants	6, 10, &, 14 weeks	None	0.700569	0.81	0.93	0.93	NA	NA	5-17mo	0 yrs	None	0.89	0.95	0.97	0.97	NA	NA	None	NA	NA	NA	NA	NA	NA	NA	NA	0.55	Severe Cases in <5yo per 100,000 population	32.3909	30.7091	29.7182	29.0091	28.8545	29.1727	28.6909	28.8273	28.6818	28.4636	27.7909	28.0727	29.6	28.6636	28.9909
112	PEV (Pre-Erythrocytic Vaccine)	3	0.5	2	0.1	Infants	6, 10, &, 14 weeks	None	0.700569	0.81	0.93	0.93	NA	NA	5-17mo	0 yrs	None	0.89	0.95	0.97	0.97	NA	NA	None	NA	NA	NA	NA	NA	NA	NA	NA	0.55	Deaths in < 5yo per 100,000 population	7.90909	7.63636	7.62727	7.59091	7.08182	7.72727	7.26364	7.75455	7.40909	7.29091	7.16364	7.34545	7.59091	7.40909	7.38182
112	PEV (Pre-Erythrocytic Vaccine)	3	0.5	2	0.1	Infants	6, 10, &, 14 weeks	None	0.700569	0.81	0.93	0.93	NA	NA	5-17mo	0 yrs	None	0.89	0.95	0.97	0.97	NA	NA	None	NA	NA	NA	NA	NA	NA	NA	NA	0.55	DALYs per 100,000 population	761.07	771.43	764.569	760.786	739.916	763.423	757.542	761.987	768.21	753.92	732.524	762.004	760.715	778.863	773.839
112	PEV (Pre-Erythrocytic Vaccine)	3	0.5	2	0.1	Infants	6, 10, &, 14 weeks	None	0.700569	0.81	0.93	0.93	NA	NA	5-17mo	0 yrs	None	0.89	0.95	0.97	0.97	NA	NA	None	NA	NA	NA	NA	NA	NA	NA	NA	0.55	Income and productivity gains from delivering vaccine (US$ / dose)	0.00118193	0.0242312	0.0254688	0.0390702	0.0483449	0.0598674	0.0828975	0.0743089	0.0718723	0.0727512	0.0812474	0.0877893	0.0684059	0.0646817	0.0558605
113	PEV (Pre-Erythrocytic Vaccine)	3	0.5	2	0.1	Infants	6, 10, &, 14 weeks	None	0.700569	0.81	0.93	0.93	NA	NA	5-17mo	0 yrs	None	0.7	0.81	0.93	0.93	NA	NA	None	NA	NA	NA	NA	NA	NA	NA	NA	0.55	Cases per 100,000 population	8588.35	8445.12	8465.84	8363.23	8306.17	8334.51	8309.94	8336.64	8373.65	8340.32	8251.12	8252.48	8257.45	8321.45	8342.63
113	PEV (Pre-Erythrocytic Vaccine)	3	0.5	2	0.1	Infants	6, 10, &, 14 weeks	None	0.700569	0.81	0.93	0.93	NA	NA	5-17mo	0 yrs	None	0.7	0.81	0.93	0.93	NA	NA	None	NA	NA	NA	NA	NA	NA	NA	NA	0.55	Severe Cases per 100,000 population	148.6	144.609	143.936	141.764	140.236	141.627	141.991	142.382	145.564	145.227	142.1	144.309	145.018	146.064	144.527
113	PEV (Pre-Erythrocytic Vaccine)	3	0.5	2	0.1	Infants	6, 10, &, 14 weeks	None	0.700569	0.81	0.93	0.93	NA	NA	5-17mo	0 yrs	None	0.7	0.81	0.93	0.93	NA	NA	None	NA	NA	NA	NA	NA	NA	NA	NA	0.55	Deaths per 100,000 population	30.5182	29.1818	30.4636	29.6	29.0636	29.0091	29.5455	29.1364	30.5455	29.6273	29.6273	29.5818	30.7636	30.0364	30.3182
113	PEV (Pre-Erythrocytic Vaccine)	3	0.5	2	0.1	Infants	6, 10, &, 14 weeks	None	0.700569	0.81	0.93	0.93	NA	NA	5-17mo	0 yrs	None	0.7	0.81	0.93	0.93	NA	NA	None	NA	NA	NA	NA	NA	NA	NA	NA	0.55	Cases in <5yo per 100,000 population	653.591	593.527	582.8	562.427	559.791	560.455	555.827	556.536	563.7	560.091	546.445	556.091	550.036	554.809	557.436
113	PEV (Pre-Erythrocytic Vaccine)	3	0.5	2	0.1	Infants	6, 10, &, 14 weeks	None	0.700569	0.81	0.93	0.93	NA	NA	5-17mo	0 yrs	None	0.7	0.81	0.93	0.93	NA	NA	None	NA	NA	NA	NA	NA	NA	NA	NA	0.55	Severe Cases in <5yo per 100,000 population	33.1909	30.8545	30.2	29.0273	28.7364	28.3273	28.7636	29.7545	29.7636	29.1545	29.2636	29.3273	28.7818	29.3364	29.4
113	PEV (Pre-Erythrocytic Vaccine)	3	0.5	2	0.1	Infants	6, 10, &, 14 weeks	None	0.700569	0.81	0.93	0.93	NA	NA	5-17mo	0 yrs	None	0.7	0.81	0.93	0.93	NA	NA	None	NA	NA	NA	NA	NA	NA	NA	NA	0.55	Deaths in < 5yo per 100,000 population	8.21818	7.74545	7.66364	7.40909	7.28182	7.52727	7.32727	7.55455	7.70909	7.13636	7.42727	7.35455	7.78182	7.40909	7.10909
113	PEV (Pre-Erythrocytic Vaccine)	3	0.5	2	0.1	Infants	6, 10, &, 14 weeks	None	0.700569	0.81	0.93	0.93	NA	NA	5-17mo	0 yrs	None	0.7	0.81	0.93	0.93	NA	NA	None	NA	NA	NA	NA	NA	NA	NA	NA	0.55	DALYs per 100,000 population	778.254	747.774	774.071	751.208	738.465	737.801	751.406	741.969	774.194	754.303	754.792	752.15	777.927	765.313	768.98
113	PEV (Pre-Erythrocytic Vaccine)	3	0.5	2	0.1	Infants	6, 10, &, 14 weeks	None	0.700569	0.81	0.93	0.93	NA	NA	5-17mo	0 yrs	None	0.7	0.81	0.93	0.93	NA	NA	None	NA	NA	NA	NA	NA	NA	NA	NA	0.55	Income and productivity gains from delivering vaccine (US$ / dose)	-0.000915782	0.0348993	0.0282218	0.0556772	0.0719476	0.0633104	0.0694895	0.0586851	0.0457293	0.0548376	0.0810489	0.0822889	0.0801925	0.0605067	0.0577895
114	PEV (Pre-Erythrocytic Vaccine)	3	0.5	2	0.1	Infants	6, 10, &, 14 weeks	None	0.700569	0.81	0.93	0.93	NA	NA	5-17mo	0 yrs	None	0.5	0.69	0.85	0.85	NA	NA	None	NA	NA	NA	NA	NA	NA	NA	NA	0.55	Cases per 100,000 population	8577.62	8470.43	8409.72	8348.91	8344.49	8319.59	8312.45	8325.49	8315.35	8361.66	8328.47	8289.69	8277.39	8281.52	8308.97
114	PEV (Pre-Erythrocytic Vaccine)	3	0.5	2	0.1	Infants	6, 10, &, 14 weeks	None	0.700569	0.81	0.93	0.93	NA	NA	5-17mo	0 yrs	None	0.5	0.69	0.85	0.85	NA	NA	None	NA	NA	NA	NA	NA	NA	NA	NA	0.55	Severe Cases per 100,000 population	148.864	148.073	144.373	143.664	142.618	143.336	141.645	142.273	145.418	144.5	144.9	143.736	143.591	143.3	143.736
114	PEV (Pre-Erythrocytic Vaccine)	3	0.5	2	0.1	Infants	6, 10, &, 14 weeks	None	0.700569	0.81	0.93	0.93	NA	NA	5-17mo	0 yrs	None	0.5	0.69	0.85	0.85	NA	NA	None	NA	NA	NA	NA	NA	NA	NA	NA	0.55	Deaths per 100,000 population	31.1909	30.3727	29.2545	30.6636	30.3909	29.7364	29.8636	29.4091	29.2909	29.6909	29.3727	29.6545	29.3636	28.5909	29.6364
114	PEV (Pre-Erythrocytic Vaccine)	3	0.5	2	0.1	Infants	6, 10, &, 14 weeks	None	0.700569	0.81	0.93	0.93	NA	NA	5-17mo	0 yrs	None	0.5	0.69	0.85	0.85	NA	NA	None	NA	NA	NA	NA	NA	NA	NA	NA	0.55	Cases in <5yo per 100,000 population	652.355	599.464	574.4	562.691	560.036	555.564	548.682	558.164	556.073	564.5	565.145	553.564	560.882	551.518	557.818
114	PEV (Pre-Erythrocytic Vaccine)	3	0.5	2	0.1	Infants	6, 10, &, 14 weeks	None	0.700569	0.81	0.93	0.93	NA	NA	5-17mo	0 yrs	None	0.5	0.69	0.85	0.85	NA	NA	None	NA	NA	NA	NA	NA	NA	NA	NA	0.55	Severe Cases in <5yo per 100,000 population	32.8	30.7455	30.2818	29.9909	29.1727	29.1091	28.3545	28.7636	29.3727	29.5727	29.5182	29.2636	29.3273	29.0273	28.8909
114	PEV (Pre-Erythrocytic Vaccine)	3	0.5	2	0.1	Infants	6, 10, &, 14 weeks	None	0.700569	0.81	0.93	0.93	NA	NA	5-17mo	0 yrs	None	0.5	0.69	0.85	0.85	NA	NA	None	NA	NA	NA	NA	NA	NA	NA	NA	0.55	Deaths in < 5yo per 100,000 population	8.01818	7.42727	6.93636	7.47273	7.46364	7.44545	7	7.37273	6.96364	7.63636	7.58182	7.50909	7.13636	6.97273	7.33636
114	PEV (Pre-Erythrocytic Vaccine)	3	0.5	2	0.1	Infants	6, 10, &, 14 weeks	None	0.700569	0.81	0.93	0.93	NA	NA	5-17mo	0 yrs	None	0.5	0.69	0.85	0.85	NA	NA	None	NA	NA	NA	NA	NA	NA	NA	NA	0.55	DALYs per 100,000 population	793.41	772.18	741.542	777.993	775.176	757.663	752.807	745.338	747.607	757.607	747.968	758.402	747.184	727.965	755.991
114	PEV (Pre-Erythrocytic Vaccine)	3	0.5	2	0.1	Infants	6, 10, &, 14 weeks	None	0.700569	0.81	0.93	0.93	NA	NA	5-17mo	0 yrs	None	0.5	0.69	0.85	0.85	NA	NA	None	NA	NA	NA	NA	NA	NA	NA	NA	0.55	Income and productivity gains from delivering vaccine (US$ / dose)	0.00106574	0.0260039	0.0403596	0.0575009	0.0588563	0.0653823	0.0667298	0.0613182	0.0611726	0.0511399	0.0600397	0.0718629	0.0770874	0.0731245	0.0659933
115	PEV (Pre-Erythrocytic Vaccine)	3	0.5	2	0.1	Infants	6, 10, &, 14 weeks	None	0.498525	0.69	0.85	0.85	NA	NA	5-17mo	0 yrs	None	0.89	0.95	0.97	0.97	NA	NA	None	NA	NA	NA	NA	NA	NA	NA	NA	0.55	Cases per 100,000 population	8580.44	8540.88	8445.05	8367.93	8387.49	8432.31	8418.78	8420.98	8369.02	8307.58	8275.27	8240.77	8251.69	8334.21	8372.73
115	PEV (Pre-Erythrocytic Vaccine)	3	0.5	2	0.1	Infants	6, 10, &, 14 weeks	None	0.498525	0.69	0.85	0.85	NA	NA	5-17mo	0 yrs	None	0.89	0.95	0.97	0.97	NA	NA	None	NA	NA	NA	NA	NA	NA	NA	NA	0.55	Severe Cases per 100,000 population	149.325	146.15	145.35	144.108	143.792	147.608	144.325	146.183	144.367	144.858	145.892	143.758	143.883	145.433	147.308
115	PEV (Pre-Erythrocytic Vaccine)	3	0.5	2	0.1	Infants	6, 10, &, 14 weeks	None	0.498525	0.69	0.85	0.85	NA	NA	5-17mo	0 yrs	None	0.89	0.95	0.97	0.97	NA	NA	None	NA	NA	NA	NA	NA	NA	NA	NA	0.55	Deaths per 100,000 population	29.8	29.725	30.6	28.8917	30.1667	30.7	30.0917	29.7833	30.1333	30.1	31.3917	29.9667	29.9417	30.65	30.6
115	PEV (Pre-Erythrocytic Vaccine)	3	0.5	2	0.1	Infants	6, 10, &, 14 weeks	None	0.498525	0.69	0.85	0.85	NA	NA	5-17mo	0 yrs	None	0.89	0.95	0.97	0.97	NA	NA	None	NA	NA	NA	NA	NA	NA	NA	NA	0.55	Cases in <5yo per 100,000 population	646.483	608.175	595.683	576.325	586.575	591.05	590.675	593.117	588.317	573.983	576.05	573.242	576.275	585.367	584.167
115	PEV (Pre-Erythrocytic Vaccine)	3	0.5	2	0.1	Infants	6, 10, &, 14 weeks	None	0.498525	0.69	0.85	0.85	NA	NA	5-17mo	0 yrs	None	0.89	0.95	0.97	0.97	NA	NA	None	NA	NA	NA	NA	NA	NA	NA	NA	0.55	Severe Cases in <5yo per 100,000 population	33.65	30.7917	29.8583	29.7667	30.175	31.2833	30.6	30.9417	30.675	29.8083	30.5833	30.1583	30.3583	30.1833	31.6333
115	PEV (Pre-Erythrocytic Vaccine)	3	0.5	2	0.1	Infants	6, 10, &, 14 weeks	None	0.498525	0.69	0.85	0.85	NA	NA	5-17mo	0 yrs	None	0.89	0.95	0.97	0.97	NA	NA	None	NA	NA	NA	NA	NA	NA	NA	NA	0.55	Deaths in < 5yo per 100,000 population	7.63333	7.49167	7.91667	7.3	7.79167	7.84167	7.475	7.4	7.625	7.66667	8.00833	7.85833	7.93333	7.95833	8.175
115	PEV (Pre-Erythrocytic Vaccine)	3	0.5	2	0.1	Infants	6, 10, &, 14 weeks	None	0.498525	0.69	0.85	0.85	NA	NA	5-17mo	0 yrs	None	0.89	0.95	0.97	0.97	NA	NA	None	NA	NA	NA	NA	NA	NA	NA	NA	0.55	DALYs per 100,000 population	757.659	759.569	774.764	741.695	767.442	777.641	766.653	759.066	765.842	766.647	795.951	763.601	766.449	779.675	780.085
115	PEV (Pre-Erythrocytic Vaccine)	3	0.5	2	0.1	Infants	6, 10, &, 14 weeks	None	0.498525	0.69	0.85	0.85	NA	NA	5-17mo	0 yrs	None	0.89	0.95	0.97	0.97	NA	NA	None	NA	NA	NA	NA	NA	NA	NA	NA	0.55	Income and productivity gains from delivering vaccine (US$ / dose)	-0.00104966	0.0121723	0.0449133	0.066506	0.0648818	0.0476865	0.0546024	0.0490791	0.0652293	0.0851992	0.0963191	0.111237	0.108406	0.077586	0.0637724
116	PEV (Pre-Erythrocytic Vaccine)	3	0.5	2	0.1	Infants	6, 10, &, 14 weeks	None	0.498525	0.69	0.85	0.85	NA	NA	5-17mo	0 yrs	None	0.7	0.81	0.93	0.93	NA	NA	None	NA	NA	NA	NA	NA	NA	NA	NA	0.55	Cases per 100,000 population	8562.04	8525.31	8528.72	8426.22	8427.39	8421.59	8376.58	8403.72	8337.15	8310.65	8297.85	8308.55	8363.59	8374.35	8329.42
116	PEV (Pre-Erythrocytic Vaccine)	3	0.5	2	0.1	Infants	6, 10, &, 14 weeks	None	0.498525	0.69	0.85	0.85	NA	NA	5-17mo	0 yrs	None	0.7	0.81	0.93	0.93	NA	NA	None	NA	NA	NA	NA	NA	NA	NA	NA	0.55	Severe Cases per 100,000 population	146.609	146.245	145.573	144.1	147.091	144.773	143.036	144.636	143.936	145.318	143.109	142.545	146.473	145.009	145.482
116	PEV (Pre-Erythrocytic Vaccine)	3	0.5	2	0.1	Infants	6, 10, &, 14 weeks	None	0.498525	0.69	0.85	0.85	NA	NA	5-17mo	0 yrs	None	0.7	0.81	0.93	0.93	NA	NA	None	NA	NA	NA	NA	NA	NA	NA	NA	0.55	Deaths per 100,000 population	29.9	30.1	29.1182	30.2182	30.2273	30.0091	29.8364	29.7182	30.1909	30.2545	29.5273	29.4	29.7909	30.9273	30.5182
116	PEV (Pre-Erythrocytic Vaccine)	3	0.5	2	0.1	Infants	6, 10, &, 14 weeks	None	0.498525	0.69	0.85	0.85	NA	NA	5-17mo	0 yrs	None	0.7	0.81	0.93	0.93	NA	NA	None	NA	NA	NA	NA	NA	NA	NA	NA	0.55	Cases in <5yo per 100,000 population	651.8	616.727	600.555	585.564	583.882	587.882	585.227	585.8	582.755	588.109	580.464	581.945	587.409	586.291	581.109
116	PEV (Pre-Erythrocytic Vaccine)	3	0.5	2	0.1	Infants	6, 10, &, 14 weeks	None	0.498525	0.69	0.85	0.85	NA	NA	5-17mo	0 yrs	None	0.7	0.81	0.93	0.93	NA	NA	None	NA	NA	NA	NA	NA	NA	NA	NA	0.55	Severe Cases in <5yo per 100,000 population	32.3909	31.4909	31	30.2545	31.6545	30.2909	30.2091	30.8364	30.3727	31.2182	30.4545	30.3909	30.1273	30.4727	29.8909
116	PEV (Pre-Erythrocytic Vaccine)	3	0.5	2	0.1	Infants	6, 10, &, 14 weeks	None	0.498525	0.69	0.85	0.85	NA	NA	5-17mo	0 yrs	None	0.7	0.81	0.93	0.93	NA	NA	None	NA	NA	NA	NA	NA	NA	NA	NA	0.55	Deaths in < 5yo per 100,000 population	8.06364	7.17273	7.77273	7.8	7.91818	7.69091	7.25455	7.68182	7.81818	7.76364	7.75455	7.13636	7.41818	7.93636	7.80909
116	PEV (Pre-Erythrocytic Vaccine)	3	0.5	2	0.1	Infants	6, 10, &, 14 weeks	None	0.498525	0.69	0.85	0.85	NA	NA	5-17mo	0 yrs	None	0.7	0.81	0.93	0.93	NA	NA	None	NA	NA	NA	NA	NA	NA	NA	NA	0.55	DALYs per 100,000 population	759.253	765.253	747.245	768.393	768.585	762.167	759.772	758.678	768.489	769.395	747.956	749.08	758.283	787.724	773.206
116	PEV (Pre-Erythrocytic Vaccine)	3	0.5	2	0.1	Infants	6, 10, &, 14 weeks	None	0.498525	0.69	0.85	0.85	NA	NA	5-17mo	0 yrs	None	0.7	0.81	0.93	0.93	NA	NA	None	NA	NA	NA	NA	NA	NA	NA	NA	0.55	Income and productivity gains from delivering vaccine (US$ / dose)	0.00543887	0.019791	0.0143088	0.0511798	0.0496332	0.0528964	0.0675942	0.0552881	0.0753799	0.0855819	0.0928308	0.0893006	0.0698575	0.0642639	0.0800832
117	PEV (Pre-Erythrocytic Vaccine)	3	0.5	2	0.1	Infants	6, 10, &, 14 weeks	None	0.498525	0.69	0.85	0.85	NA	NA	5-17mo	0 yrs	None	0.5	0.69	0.85	0.85	NA	NA	None	NA	NA	NA	NA	NA	NA	NA	NA	0.55	Cases per 100,000 population	8564.51	8515.77	8506.73	8464.76	8427.17	8379.45	8310.78	8408.19	8347.38	8320.21	8415.25	8396.2	8488.88	8407.15	8323.25
117	PEV (Pre-Erythrocytic Vaccine)	3	0.5	2	0.1	Infants	6, 10, &, 14 weeks	None	0.498525	0.69	0.85	0.85	NA	NA	5-17mo	0 yrs	None	0.5	0.69	0.85	0.85	NA	NA	None	NA	NA	NA	NA	NA	NA	NA	NA	0.55	Severe Cases per 100,000 population	150.345	148.355	147.264	146.345	145.555	145.055	140.455	147.091	144.736	145.073	146.736	148.2	149.309	145.164	144.018
117	PEV (Pre-Erythrocytic Vaccine)	3	0.5	2	0.1	Infants	6, 10, &, 14 weeks	None	0.498525	0.69	0.85	0.85	NA	NA	5-17mo	0 yrs	None	0.5	0.69	0.85	0.85	NA	NA	None	NA	NA	NA	NA	NA	NA	NA	NA	0.55	Deaths per 100,000 population	30.8727	29.4455	29.7455	30.1818	30.6727	29.3727	29.4091	30.4727	29.2364	29.6	29.6273	30.3727	29.7909	29.2636	29.4091
117	PEV (Pre-Erythrocytic Vaccine)	3	0.5	2	0.1	Infants	6, 10, &, 14 weeks	None	0.498525	0.69	0.85	0.85	NA	NA	5-17mo	0 yrs	None	0.5	0.69	0.85	0.85	NA	NA	None	NA	NA	NA	NA	NA	NA	NA	NA	0.55	Cases in <5yo per 100,000 population	656.373	622.364	604.445	593.609	592.645	592.355	581.945	590	590.464	586.191	586.255	587.009	596.755	596.636	583.5
117	PEV (Pre-Erythrocytic Vaccine)	3	0.5	2	0.1	Infants	6, 10, &, 14 weeks	None	0.498525	0.69	0.85	0.85	NA	NA	5-17mo	0 yrs	None	0.5	0.69	0.85	0.85	NA	NA	None	NA	NA	NA	NA	NA	NA	NA	NA	0.55	Severe Cases in <5yo per 100,000 population	33.4091	31.8636	31.0364	31.3182	30.5273	30.4455	30.4	31.1909	30.4364	29.6818	31.3091	30.5909	32.2091	30.1182	29.2455
117	PEV (Pre-Erythrocytic Vaccine)	3	0.5	2	0.1	Infants	6, 10, &, 14 weeks	None	0.498525	0.69	0.85	0.85	NA	NA	5-17mo	0 yrs	None	0.5	0.69	0.85	0.85	NA	NA	None	NA	NA	NA	NA	NA	NA	NA	NA	0.55	Deaths in < 5yo per 100,000 population	7.95455	7.23636	7.94545	7.17273	7.75455	7.28182	7.64545	7.57273	7.27273	7.23636	7	7.88182	6.93636	7.27273	7.67273
117	PEV (Pre-Erythrocytic Vaccine)	3	0.5	2	0.1	Infants	6, 10, &, 14 weeks	None	0.498525	0.69	0.85	0.85	NA	NA	5-17mo	0 yrs	None	0.5	0.69	0.85	0.85	NA	NA	None	NA	NA	NA	NA	NA	NA	NA	NA	0.55	DALYs per 100,000 population	779.494	750.749	760.152	765.025	776.33	747.644	749.075	774.059	741.998	756.491	756.154	773.141	758.663	748.133	750.253
117	PEV (Pre-Erythrocytic Vaccine)	3	0.5	2	0.1	Infants	6, 10, &, 14 weeks	None	0.498525	0.69	0.85	0.85	NA	NA	5-17mo	0 yrs	None	0.5	0.69	0.85	0.85	NA	NA	None	NA	NA	NA	NA	NA	NA	NA	NA	0.55	Income and productivity gains from delivering vaccine (US$ / dose)	0.00392333	0.0195597	0.0221652	0.0366692	0.0505177	0.0677965	0.0930064	0.0501236	0.0707709	0.0813839	0.0494202	0.0544677	0.0242535	0.0551408	0.0837611
118	PEV (Pre-Erythrocytic Vaccine)	3	0.5	2	1	Infants	6, 10, &, 14 weeks	None	0.893855	0.95	0.97	0.97	NA	NA	5-17mo	0 yrs	None	0.89	0.95	0.97	0.97	NA	NA	None	NA	NA	NA	NA	NA	NA	NA	NA	0.55	Cases per 100,000 population	85267.2	84759.2	84781.5	83143.5	83080.1	83540.3	82635.3	82665.4	81843.5	81445.7	81232.7	81386.7	81736	81947.5	81687.2
118	PEV (Pre-Erythrocytic Vaccine)	3	0.5	2	1	Infants	6, 10, &, 14 weeks	None	0.893855	0.95	0.97	0.97	NA	NA	5-17mo	0 yrs	None	0.89	0.95	0.97	0.97	NA	NA	None	NA	NA	NA	NA	NA	NA	NA	NA	0.55	Severe Cases per 100,000 population	1506.55	1442.55	1439.18	1413.36	1403.64	1423.55	1418.45	1402.82	1400.09	1397.27	1404.91	1373.91	1444.27	1422.55	1426.27
118	PEV (Pre-Erythrocytic Vaccine)	3	0.5	2	1	Infants	6, 10, &, 14 weeks	None	0.893855	0.95	0.97	0.97	NA	NA	5-17mo	0 yrs	None	0.89	0.95	0.97	0.97	NA	NA	None	NA	NA	NA	NA	NA	NA	NA	NA	0.55	Deaths per 100,000 population	301.727	295.545	301.273	296	291.455	292.636	290.818	296.636	290.273	285.455	303.182	292.545	295.455	290.636	294.364
118	PEV (Pre-Erythrocytic Vaccine)	3	0.5	2	1	Infants	6, 10, &, 14 weeks	None	0.893855	0.95	0.97	0.97	NA	NA	5-17mo	0 yrs	None	0.89	0.95	0.97	0.97	NA	NA	None	NA	NA	NA	NA	NA	NA	NA	NA	0.55	Cases in <5yo per 100,000 population	6460.82	5870.91	5673.45	5294.36	5376.64	5331.45	5291.27	5294.55	5220.45	5206.09	5171.64	5158.36	5188.27	5188.45	5197.18
118	PEV (Pre-Erythrocytic Vaccine)	3	0.5	2	1	Infants	6, 10, &, 14 weeks	None	0.893855	0.95	0.97	0.97	NA	NA	5-17mo	0 yrs	None	0.89	0.95	0.97	0.97	NA	NA	None	NA	NA	NA	NA	NA	NA	NA	NA	0.55	Severe Cases in <5yo per 100,000 population	331.182	296.091	288.273	280.273	274.545	275.727	270.364	269.636	272.727	268.364	270.909	266.273	280.091	262.727	273.182
118	PEV (Pre-Erythrocytic Vaccine)	3	0.5	2	1	Infants	6, 10, &, 14 weeks	None	0.893855	0.95	0.97	0.97	NA	NA	5-17mo	0 yrs	None	0.89	0.95	0.97	0.97	NA	NA	None	NA	NA	NA	NA	NA	NA	NA	NA	0.55	Deaths in < 5yo per 100,000 population	76.8182	74.0909	73.5455	73.1818	70.6364	68.9091	65.1818	75	71	72.0909	73.4545	73.2727	70.2727	65.8182	73.0909
118	PEV (Pre-Erythrocytic Vaccine)	3	0.5	2	1	Infants	6, 10, &, 14 weeks	None	0.893855	0.95	0.97	0.97	NA	NA	5-17mo	0 yrs	None	0.89	0.95	0.97	0.97	NA	NA	None	NA	NA	NA	NA	NA	NA	NA	NA	0.55	DALYs per 100,000 population	7695.95	7540.45	7623.23	7520.64	7384.11	7439.6	7381.69	7501.76	7373.75	7315.9	7716.29	7442.63	7528.43	7384.98	7501.04
118	PEV (Pre-Erythrocytic Vaccine)	3	0.5	2	1	Infants	6, 10, &, 14 weeks	None	0.893855	0.95	0.97	0.97	NA	NA	5-17mo	0 yrs	None	0.89	0.95	0.97	0.97	NA	NA	None	NA	NA	NA	NA	NA	NA	NA	NA	0.55	Income and productivity gains from delivering vaccine (US$ / dose)	0.067421	0.201536	0.191912	0.518848	0.565529	0.451489	0.635034	0.625755	0.781893	0.872506	0.942476	0.92132	0.808664	0.756058	0.829511
119	PEV (Pre-Erythrocytic Vaccine)	3	0.5	2	1	Infants	6, 10, &, 14 weeks	None	0.893855	0.95	0.97	0.97	NA	NA	5-17mo	0 yrs	None	0.7	0.81	0.93	0.93	NA	NA	None	NA	NA	NA	NA	NA	NA	NA	NA	0.55	Cases per 100,000 population	86001.3	84669.5	84227.3	83207.5	82656.6	82920.3	82953	82429.2	81915.7	81899.5	82377	81789.3	81424.5	81504.9	81266.4
119	PEV (Pre-Erythrocytic Vaccine)	3	0.5	2	1	Infants	6, 10, &, 14 weeks	None	0.893855	0.95	0.97	0.97	NA	NA	5-17mo	0 yrs	None	0.7	0.81	0.93	0.93	NA	NA	None	NA	NA	NA	NA	NA	NA	NA	NA	0.55	Severe Cases per 100,000 population	1495.18	1447	1421.64	1417.09	1407.45	1409.73	1422.45	1400.45	1415.09	1386.36	1416.73	1428.27	1392.55	1422.64	1419.91
119	PEV (Pre-Erythrocytic Vaccine)	3	0.5	2	1	Infants	6, 10, &, 14 weeks	None	0.893855	0.95	0.97	0.97	NA	NA	5-17mo	0 yrs	None	0.7	0.81	0.93	0.93	NA	NA	None	NA	NA	NA	NA	NA	NA	NA	NA	0.55	Deaths per 100,000 population	307.909	300.545	294	290.545	297.727	293.727	293.364	290.364	299.636	285.727	296.909	294.909	298.273	289.364	298.909
119	PEV (Pre-Erythrocytic Vaccine)	3	0.5	2	1	Infants	6, 10, &, 14 weeks	None	0.893855	0.95	0.97	0.97	NA	NA	5-17mo	0 yrs	None	0.7	0.81	0.93	0.93	NA	NA	None	NA	NA	NA	NA	NA	NA	NA	NA	0.55	Cases in <5yo per 100,000 population	6535.91	5892	5626.18	5374.91	5292.82	5290.64	5266.64	5261	5164.55	5249	5231.45	5236.82	5168.55	5154.55	5130.45
119	PEV (Pre-Erythrocytic Vaccine)	3	0.5	2	1	Infants	6, 10, &, 14 weeks	None	0.893855	0.95	0.97	0.97	NA	NA	5-17mo	0 yrs	None	0.7	0.81	0.93	0.93	NA	NA	None	NA	NA	NA	NA	NA	NA	NA	NA	0.55	Severe Cases in <5yo per 100,000 population	337.091	300.818	282.091	280.182	281.091	277.091	280.091	284.273	284	273.545	268.273	278.636	270.818	283.364	272.727
119	PEV (Pre-Erythrocytic Vaccine)	3	0.5	2	1	Infants	6, 10, &, 14 weeks	None	0.893855	0.95	0.97	0.97	NA	NA	5-17mo	0 yrs	None	0.7	0.81	0.93	0.93	NA	NA	None	NA	NA	NA	NA	NA	NA	NA	NA	0.55	Deaths in < 5yo per 100,000 population	81.8182	76.7273	70.8182	70	69.2727	68.7273	68.6364	70	73.5455	68.4545	71	73.7273	70.4545	70.3636	71.1818
119	PEV (Pre-Erythrocytic Vaccine)	3	0.5	2	1	Infants	6, 10, &, 14 weeks	None	0.893855	0.95	0.97	0.97	NA	NA	5-17mo	0 yrs	None	0.7	0.81	0.93	0.93	NA	NA	None	NA	NA	NA	NA	NA	NA	NA	NA	0.55	DALYs per 100,000 population	7844.27	7626.44	7475.96	7399.94	7556.73	7449.29	7450.95	7380.33	7595.35	7246.61	7596.59	7498.68	7567.97	7327.45	7567.16
119	PEV (Pre-Erythrocytic Vaccine)	3	0.5	2	1	Infants	6, 10, &, 14 weeks	None	0.893855	0.95	0.97	0.97	NA	NA	5-17mo	0 yrs	None	0.7	0.81	0.93	0.93	NA	NA	None	NA	NA	NA	NA	NA	NA	NA	NA	0.55	Income and productivity gains from delivering vaccine (US$ / dose)	-0.0322506	0.223415	0.299405	0.523935	0.655288	0.596957	0.564013	0.687909	0.752157	0.797062	0.700117	0.811165	0.918278	0.869154	0.911049
120	PEV (Pre-Erythrocytic Vaccine)	3	0.5	2	1	Infants	6, 10, &, 14 weeks	None	0.893855	0.95	0.97	0.97	NA	NA	5-17mo	0 yrs	None	0.5	0.69	0.85	0.85	NA	NA	None	NA	NA	NA	NA	NA	NA	NA	NA	0.55	Cases per 100,000 population	85764.9	83989	83722.4	83293.8	82843	82607.5	82662.2	82988.1	82127.6	81737.5	81535.2	81226.5	81521.9	81969.4	81563.5
120	PEV (Pre-Erythrocytic Vaccine)	3	0.5	2	1	Infants	6, 10, &, 14 weeks	None	0.893855	0.95	0.97	0.97	NA	NA	5-17mo	0 yrs	None	0.5	0.69	0.85	0.85	NA	NA	None	NA	NA	NA	NA	NA	NA	NA	NA	0.55	Severe Cases per 100,000 population	1506.18	1451.45	1426.82	1409.55	1420.36	1415.82	1414.64	1423.45	1427	1402.27	1396.45	1398.82	1420.82	1427.91	1445.82
120	PEV (Pre-Erythrocytic Vaccine)	3	0.5	2	1	Infants	6, 10, &, 14 weeks	None	0.893855	0.95	0.97	0.97	NA	NA	5-17mo	0 yrs	None	0.5	0.69	0.85	0.85	NA	NA	None	NA	NA	NA	NA	NA	NA	NA	NA	0.55	Deaths per 100,000 population	309.273	308.818	292.545	287.182	287.818	295.545	290.909	297.636	287.455	288.727	298.182	281.273	300.818	302.273	306.273
120	PEV (Pre-Erythrocytic Vaccine)	3	0.5	2	1	Infants	6, 10, &, 14 weeks	None	0.893855	0.95	0.97	0.97	NA	NA	5-17mo	0 yrs	None	0.5	0.69	0.85	0.85	NA	NA	None	NA	NA	NA	NA	NA	NA	NA	NA	0.55	Cases in <5yo per 100,000 population	6545.45	5872.45	5639	5382.73	5370.73	5281.82	5291.91	5313.09	5231.91	5214.27	5184.82	5147	5200.27	5193.73	5206.36
120	PEV (Pre-Erythrocytic Vaccine)	3	0.5	2	1	Infants	6, 10, &, 14 weeks	None	0.893855	0.95	0.97	0.97	NA	NA	5-17mo	0 yrs	None	0.5	0.69	0.85	0.85	NA	NA	None	NA	NA	NA	NA	NA	NA	NA	NA	0.55	Severe Cases in <5yo per 100,000 population	337.455	310.909	285	274.545	277.909	277.818	276.273	277.636	281.727	274.091	266.545	262.273	269.818	276.818	279.636
120	PEV (Pre-Erythrocytic Vaccine)	3	0.5	2	1	Infants	6, 10, &, 14 weeks	None	0.893855	0.95	0.97	0.97	NA	NA	5-17mo	0 yrs	None	0.5	0.69	0.85	0.85	NA	NA	None	NA	NA	NA	NA	NA	NA	NA	NA	0.55	Deaths in < 5yo per 100,000 population	78.0909	79.4545	68.2727	68.9091	69.5455	74.3636	67.1818	68.8182	67.2727	73.7273	71.5455	67.6364	72.6364	71.1818	71.1818
120	PEV (Pre-Erythrocytic Vaccine)	3	0.5	2	1	Infants	6, 10, &, 14 weeks	None	0.893855	0.95	0.97	0.97	NA	NA	5-17mo	0 yrs	None	0.5	0.69	0.85	0.85	NA	NA	None	NA	NA	NA	NA	NA	NA	NA	NA	0.55	DALYs per 100,000 population	7887.52	7840.46	7409.83	7289	7323.72	7495.71	7404.37	7552.54	7300.31	7366.59	7562.4	7169.48	7652.7	7663.88	7789.17
120	PEV (Pre-Erythrocytic Vaccine)	3	0.5	2	1	Infants	6, 10, &, 14 weeks	None	0.893855	0.95	0.97	0.97	NA	NA	5-17mo	0 yrs	None	0.5	0.69	0.85	0.85	NA	NA	None	NA	NA	NA	NA	NA	NA	NA	NA	0.55	Income and productivity gains from delivering vaccine (US$ / dose)	0.00412936	0.382509	0.411641	0.5027	0.614681	0.654809	0.63697	0.533818	0.701341	0.818889	0.879373	0.940642	0.87103	0.76503	0.843299
121	PEV (Pre-Erythrocytic Vaccine)	3	0.5	2	1	Infants	6, 10, &, 14 weeks	None	0.700569	0.81	0.93	0.93	NA	NA	5-17mo	0 yrs	None	0.89	0.95	0.97	0.97	NA	NA	None	NA	NA	NA	NA	NA	NA	NA	NA	0.55	Cases per 100,000 population	85790.3	84773.3	84716.4	84171.8	83914.8	83405.1	82564.9	82828.5	82811.9	82748	82554.6	82298.6	83059	83151.4	83444.4
121	PEV (Pre-Erythrocytic Vaccine)	3	0.5	2	1	Infants	6, 10, &, 14 weeks	None	0.700569	0.81	0.93	0.93	NA	NA	5-17mo	0 yrs	None	0.89	0.95	0.97	0.97	NA	NA	None	NA	NA	NA	NA	NA	NA	NA	NA	0.55	Severe Cases per 100,000 population	1464.36	1460.36	1439.45	1429.55	1421.55	1437.27	1417.82	1404.18	1419.45	1437.64	1420.55	1421.36	1458.09	1451	1448.64
121	PEV (Pre-Erythrocytic Vaccine)	3	0.5	2	1	Infants	6, 10, &, 14 weeks	None	0.700569	0.81	0.93	0.93	NA	NA	5-17mo	0 yrs	None	0.89	0.95	0.97	0.97	NA	NA	None	NA	NA	NA	NA	NA	NA	NA	NA	0.55	Deaths per 100,000 population	299.364	302.909	301.182	298.273	293.091	299.818	297.727	298.364	303.636	297.545	287	299.091	300.091	305.909	305.455
121	PEV (Pre-Erythrocytic Vaccine)	3	0.5	2	1	Infants	6, 10, &, 14 weeks	None	0.700569	0.81	0.93	0.93	NA	NA	5-17mo	0 yrs	None	0.89	0.95	0.97	0.97	NA	NA	None	NA	NA	NA	NA	NA	NA	NA	NA	0.55	Cases in <5yo per 100,000 population	6482.91	5946	5813.91	5654.64	5680.18	5560.27	5479.64	5537.73	5573.27	5578.09	5539.82	5517	5584.18	5598.27	5508.82
121	PEV (Pre-Erythrocytic Vaccine)	3	0.5	2	1	Infants	6, 10, &, 14 weeks	None	0.700569	0.81	0.93	0.93	NA	NA	5-17mo	0 yrs	None	0.89	0.95	0.97	0.97	NA	NA	None	NA	NA	NA	NA	NA	NA	NA	NA	0.55	Severe Cases in <5yo per 100,000 population	323.909	307.091	297.182	290.091	288.545	291.727	286.909	288.273	286.818	284.636	277.909	280.727	296	286.636	289.909
121	PEV (Pre-Erythrocytic Vaccine)	3	0.5	2	1	Infants	6, 10, &, 14 weeks	None	0.700569	0.81	0.93	0.93	NA	NA	5-17mo	0 yrs	None	0.89	0.95	0.97	0.97	NA	NA	None	NA	NA	NA	NA	NA	NA	NA	NA	0.55	Deaths in < 5yo per 100,000 population	79.0909	76.3636	76.2727	75.9091	70.8182	77.2727	72.6364	77.5455	74.0909	72.9091	71.6364	73.4545	75.9091	74.0909	73.8182
121	PEV (Pre-Erythrocytic Vaccine)	3	0.5	2	1	Infants	6, 10, &, 14 weeks	None	0.700569	0.81	0.93	0.93	NA	NA	5-17mo	0 yrs	None	0.89	0.95	0.97	0.97	NA	NA	None	NA	NA	NA	NA	NA	NA	NA	NA	0.55	DALYs per 100,000 population	7610.7	7714.3	7645.69	7607.86	7399.16	7634.23	7575.42	7619.87	7682.1	7539.2	7325.24	7620.04	7607.15	7788.63	7738.39
121	PEV (Pre-Erythrocytic Vaccine)	3	0.5	2	1	Infants	6, 10, &, 14 weeks	None	0.700569	0.81	0.93	0.93	NA	NA	5-17mo	0 yrs	None	0.89	0.95	0.97	0.97	NA	NA	None	NA	NA	NA	NA	NA	NA	NA	NA	0.55	Income and productivity gains from delivering vaccine (US$ / dose)	0.0118193	0.242312	0.254688	0.390702	0.483449	0.598674	0.828975	0.743089	0.718723	0.727512	0.812474	0.877893	0.684059	0.646817	0.558605
122	PEV (Pre-Erythrocytic Vaccine)	3	0.5	2	1	Infants	6, 10, &, 14 weeks	None	0.700569	0.81	0.93	0.93	NA	NA	5-17mo	0 yrs	None	0.7	0.81	0.93	0.93	NA	NA	None	NA	NA	NA	NA	NA	NA	NA	NA	0.55	Cases per 100,000 population	85883.5	84451.2	84658.4	83632.3	83061.7	83345.1	83099.4	83366.4	83736.5	83403.2	82511.2	82524.8	82574.5	83214.5	83426.3
122	PEV (Pre-Erythrocytic Vaccine)	3	0.5	2	1	Infants	6, 10, &, 14 weeks	None	0.700569	0.81	0.93	0.93	NA	NA	5-17mo	0 yrs	None	0.7	0.81	0.93	0.93	NA	NA	None	NA	NA	NA	NA	NA	NA	NA	NA	0.55	Severe Cases per 100,000 population	1486	1446.09	1439.36	1417.64	1402.36	1416.27	1419.91	1423.82	1455.64	1452.27	1421	1443.09	1450.18	1460.64	1445.27
122	PEV (Pre-Erythrocytic Vaccine)	3	0.5	2	1	Infants	6, 10, &, 14 weeks	None	0.700569	0.81	0.93	0.93	NA	NA	5-17mo	0 yrs	None	0.7	0.81	0.93	0.93	NA	NA	None	NA	NA	NA	NA	NA	NA	NA	NA	0.55	Deaths per 100,000 population	305.182	291.818	304.636	296	290.636	290.091	295.455	291.364	305.455	296.273	296.273	295.818	307.636	300.364	303.182
122	PEV (Pre-Erythrocytic Vaccine)	3	0.5	2	1	Infants	6, 10, &, 14 weeks	None	0.700569	0.81	0.93	0.93	NA	NA	5-17mo	0 yrs	None	0.7	0.81	0.93	0.93	NA	NA	None	NA	NA	NA	NA	NA	NA	NA	NA	0.55	Cases in <5yo per 100,000 population	6535.91	5935.27	5828	5624.27	5597.91	5604.55	5558.27	5565.36	5637	5600.91	5464.45	5560.91	5500.36	5548.09	5574.36
122	PEV (Pre-Erythrocytic Vaccine)	3	0.5	2	1	Infants	6, 10, &, 14 weeks	None	0.700569	0.81	0.93	0.93	NA	NA	5-17mo	0 yrs	None	0.7	0.81	0.93	0.93	NA	NA	None	NA	NA	NA	NA	NA	NA	NA	NA	0.55	Severe Cases in <5yo per 100,000 population	331.909	308.545	302	290.273	287.364	283.273	287.636	297.545	297.636	291.545	292.636	293.273	287.818	293.364	294
122	PEV (Pre-Erythrocytic Vaccine)	3	0.5	2	1	Infants	6, 10, &, 14 weeks	None	0.700569	0.81	0.93	0.93	NA	NA	5-17mo	0 yrs	None	0.7	0.81	0.93	0.93	NA	NA	None	NA	NA	NA	NA	NA	NA	NA	NA	0.55	Deaths in < 5yo per 100,000 population	82.1818	77.4545	76.6364	74.0909	72.8182	75.2727	73.2727	75.5455	77.0909	71.3636	74.2727	73.5455	77.8182	74.0909	71.0909
122	PEV (Pre-Erythrocytic Vaccine)	3	0.5	2	1	Infants	6, 10, &, 14 weeks	None	0.700569	0.81	0.93	0.93	NA	NA	5-17mo	0 yrs	None	0.7	0.81	0.93	0.93	NA	NA	None	NA	NA	NA	NA	NA	NA	NA	NA	0.55	DALYs per 100,000 population	7782.54	7477.74	7740.71	7512.08	7384.65	7378.01	7514.06	7419.69	7741.94	7543.03	7547.92	7521.5	7779.27	7653.13	7689.8
122	PEV (Pre-Erythrocytic Vaccine)	3	0.5	2	1	Infants	6, 10, &, 14 weeks	None	0.700569	0.81	0.93	0.93	NA	NA	5-17mo	0 yrs	None	0.7	0.81	0.93	0.93	NA	NA	None	NA	NA	NA	NA	NA	NA	NA	NA	0.55	Income and productivity gains from delivering vaccine (US$ / dose)	-0.00915782	0.348993	0.282218	0.556772	0.719476	0.633104	0.694895	0.586851	0.457293	0.548376	0.810489	0.822889	0.801925	0.605067	0.577895
123	PEV (Pre-Erythrocytic Vaccine)	3	0.5	2	1	Infants	6, 10, &, 14 weeks	None	0.700569	0.81	0.93	0.93	NA	NA	5-17mo	0 yrs	None	0.5	0.69	0.85	0.85	NA	NA	None	NA	NA	NA	NA	NA	NA	NA	NA	0.55	Cases per 100,000 population	85776.2	84704.3	84097.2	83489.1	83444.9	83195.9	83124.5	83254.9	83153.5	83616.6	83284.7	82896.9	82773.9	82815.2	83089.7
123	PEV (Pre-Erythrocytic Vaccine)	3	0.5	2	1	Infants	6, 10, &, 14 weeks	None	0.700569	0.81	0.93	0.93	NA	NA	5-17mo	0 yrs	None	0.5	0.69	0.85	0.85	NA	NA	None	NA	NA	NA	NA	NA	NA	NA	NA	0.55	Severe Cases per 100,000 population	1488.64	1480.73	1443.73	1436.64	1426.18	1433.36	1416.45	1422.73	1454.18	1445	1449	1437.36	1435.91	1433	1437.36
123	PEV (Pre-Erythrocytic Vaccine)	3	0.5	2	1	Infants	6, 10, &, 14 weeks	None	0.700569	0.81	0.93	0.93	NA	NA	5-17mo	0 yrs	None	0.5	0.69	0.85	0.85	NA	NA	None	NA	NA	NA	NA	NA	NA	NA	NA	0.55	Deaths per 100,000 population	311.909	303.727	292.545	306.636	303.909	297.364	298.636	294.091	292.909	296.909	293.727	296.545	293.636	285.909	296.364
123	PEV (Pre-Erythrocytic Vaccine)	3	0.5	2	1	Infants	6, 10, &, 14 weeks	None	0.700569	0.81	0.93	0.93	NA	NA	5-17mo	0 yrs	None	0.5	0.69	0.85	0.85	NA	NA	None	NA	NA	NA	NA	NA	NA	NA	NA	0.55	Cases in <5yo per 100,000 population	6523.55	5994.64	5744	5626.91	5600.36	5555.64	5486.82	5581.64	5560.73	5645	5651.45	5535.64	5608.82	5515.18	5578.18
123	PEV (Pre-Erythrocytic Vaccine)	3	0.5	2	1	Infants	6, 10, &, 14 weeks	None	0.700569	0.81	0.93	0.93	NA	NA	5-17mo	0 yrs	None	0.5	0.69	0.85	0.85	NA	NA	None	NA	NA	NA	NA	NA	NA	NA	NA	0.55	Severe Cases in <5yo per 100,000 population	328	307.455	302.818	299.909	291.727	291.091	283.545	287.636	293.727	295.727	295.182	292.636	293.273	290.273	288.909
123	PEV (Pre-Erythrocytic Vaccine)	3	0.5	2	1	Infants	6, 10, &, 14 weeks	None	0.700569	0.81	0.93	0.93	NA	NA	5-17mo	0 yrs	None	0.5	0.69	0.85	0.85	NA	NA	None	NA	NA	NA	NA	NA	NA	NA	NA	0.55	Deaths in < 5yo per 100,000 population	80.1818	74.2727	69.3636	74.7273	74.6364	74.4545	70	73.7273	69.6364	76.3636	75.8182	75.0909	71.3636	69.7273	73.3636
123	PEV (Pre-Erythrocytic Vaccine)	3	0.5	2	1	Infants	6, 10, &, 14 weeks	None	0.700569	0.81	0.93	0.93	NA	NA	5-17mo	0 yrs	None	0.5	0.69	0.85	0.85	NA	NA	None	NA	NA	NA	NA	NA	NA	NA	NA	0.55	DALYs per 100,000 population	7934.1	7721.8	7415.42	7779.93	7751.76	7576.63	7528.07	7453.38	7476.07	7576.07	7479.68	7584.02	7471.84	7279.65	7559.91
123	PEV (Pre-Erythrocytic Vaccine)	3	0.5	2	1	Infants	6, 10, &, 14 weeks	None	0.700569	0.81	0.93	0.93	NA	NA	5-17mo	0 yrs	None	0.5	0.69	0.85	0.85	NA	NA	None	NA	NA	NA	NA	NA	NA	NA	NA	0.55	Income and productivity gains from delivering vaccine (US$ / dose)	0.0106574	0.260039	0.403596	0.575009	0.588563	0.653823	0.667298	0.613182	0.611726	0.511399	0.600397	0.718629	0.770874	0.731245	0.659933
124	PEV (Pre-Erythrocytic Vaccine)	3	0.5	2	1	Infants	6, 10, &, 14 weeks	None	0.498525	0.69	0.85	0.85	NA	NA	5-17mo	0 yrs	None	0.89	0.95	0.97	0.97	NA	NA	None	NA	NA	NA	NA	NA	NA	NA	NA	0.55	Cases per 100,000 population	85804.4	85408.8	84450.5	83679.3	83874.9	84323.1	84187.8	84209.8	83690.2	83075.8	82752.7	82407.7	82516.9	83342.1	83727.3
124	PEV (Pre-Erythrocytic Vaccine)	3	0.5	2	1	Infants	6, 10, &, 14 weeks	None	0.498525	0.69	0.85	0.85	NA	NA	5-17mo	0 yrs	None	0.89	0.95	0.97	0.97	NA	NA	None	NA	NA	NA	NA	NA	NA	NA	NA	0.55	Severe Cases per 100,000 population	1493.25	1461.5	1453.5	1441.08	1437.92	1476.08	1443.25	1461.83	1443.67	1448.58	1458.92	1437.58	1438.83	1454.33	1473.08
124	PEV (Pre-Erythrocytic Vaccine)	3	0.5	2	1	Infants	6, 10, &, 14 weeks	None	0.498525	0.69	0.85	0.85	NA	NA	5-17mo	0 yrs	None	0.89	0.95	0.97	0.97	NA	NA	None	NA	NA	NA	NA	NA	NA	NA	NA	0.55	Deaths per 100,000 population	298	297.25	306	288.917	301.667	307	300.917	297.833	301.333	301	313.917	299.667	299.417	306.5	306
124	PEV (Pre-Erythrocytic Vaccine)	3	0.5	2	1	Infants	6, 10, &, 14 weeks	None	0.498525	0.69	0.85	0.85	NA	NA	5-17mo	0 yrs	None	0.89	0.95	0.97	0.97	NA	NA	None	NA	NA	NA	NA	NA	NA	NA	NA	0.55	Cases in <5yo per 100,000 population	6464.83	6081.75	5956.83	5763.25	5865.75	5910.5	5906.75	5931.17	5883.17	5739.83	5760.5	5732.42	5762.75	5853.67	5841.67
124	PEV (Pre-Erythrocytic Vaccine)	3	0.5	2	1	Infants	6, 10, &, 14 weeks	None	0.498525	0.69	0.85	0.85	NA	NA	5-17mo	0 yrs	None	0.89	0.95	0.97	0.97	NA	NA	None	NA	NA	NA	NA	NA	NA	NA	NA	0.55	Severe Cases in <5yo per 100,000 population	336.5	307.917	298.583	297.667	301.75	312.833	306	309.417	306.75	298.083	305.833	301.583	303.583	301.833	316.333
124	PEV (Pre-Erythrocytic Vaccine)	3	0.5	2	1	Infants	6, 10, &, 14 weeks	None	0.498525	0.69	0.85	0.85	NA	NA	5-17mo	0 yrs	None	0.89	0.95	0.97	0.97	NA	NA	None	NA	NA	NA	NA	NA	NA	NA	NA	0.55	Deaths in < 5yo per 100,000 population	76.3333	74.9167	79.1667	73	77.9167	78.4167	74.75	74	76.25	76.6667	80.0833	78.5833	79.3333	79.5833	81.75
124	PEV (Pre-Erythrocytic Vaccine)	3	0.5	2	1	Infants	6, 10, &, 14 weeks	None	0.498525	0.69	0.85	0.85	NA	NA	5-17mo	0 yrs	None	0.89	0.95	0.97	0.97	NA	NA	None	NA	NA	NA	NA	NA	NA	NA	NA	0.55	DALYs per 100,000 population	7576.59	7595.69	7747.64	7416.95	7674.42	7776.41	7666.53	7590.66	7658.42	7666.47	7959.51	7636.01	7664.49	7796.75	7800.85
124	PEV (Pre-Erythrocytic Vaccine)	3	0.5	2	1	Infants	6, 10, &, 14 weeks	None	0.498525	0.69	0.85	0.85	NA	NA	5-17mo	0 yrs	None	0.89	0.95	0.97	0.97	NA	NA	None	NA	NA	NA	NA	NA	NA	NA	NA	0.55	Income and productivity gains from delivering vaccine (US$ / dose)	-0.0104966	0.121723	0.449133	0.66506	0.648818	0.476865	0.546024	0.490791	0.652293	0.851992	0.963191	1.11237	1.08406	0.77586	0.637724
125	PEV (Pre-Erythrocytic Vaccine)	3	0.5	2	1	Infants	6, 10, &, 14 weeks	None	0.498525	0.69	0.85	0.85	NA	NA	5-17mo	0 yrs	None	0.7	0.81	0.93	0.93	NA	NA	None	NA	NA	NA	NA	NA	NA	NA	NA	0.55	Cases per 100,000 population	85620.4	85253.1	85287.2	84262.2	84273.9	84215.9	83765.8	84037.2	83371.5	83106.5	82978.5	83085.5	83635.9	83743.5	83294.2
125	PEV (Pre-Erythrocytic Vaccine)	3	0.5	2	1	Infants	6, 10, &, 14 weeks	None	0.498525	0.69	0.85	0.85	NA	NA	5-17mo	0 yrs	None	0.7	0.81	0.93	0.93	NA	NA	None	NA	NA	NA	NA	NA	NA	NA	NA	0.55	Severe Cases per 100,000 population	1466.09	1462.45	1455.73	1441	1470.91	1447.73	1430.36	1446.36	1439.36	1453.18	1431.09	1425.45	1464.73	1450.09	1454.82
125	PEV (Pre-Erythrocytic Vaccine)	3	0.5	2	1	Infants	6, 10, &, 14 weeks	None	0.498525	0.69	0.85	0.85	NA	NA	5-17mo	0 yrs	None	0.7	0.81	0.93	0.93	NA	NA	None	NA	NA	NA	NA	NA	NA	NA	NA	0.55	Deaths per 100,000 population	299	301	291.182	302.182	302.273	300.091	298.364	297.182	301.909	302.545	295.273	294	297.909	309.273	305.182
125	PEV (Pre-Erythrocytic Vaccine)	3	0.5	2	1	Infants	6, 10, &, 14 weeks	None	0.498525	0.69	0.85	0.85	NA	NA	5-17mo	0 yrs	None	0.7	0.81	0.93	0.93	NA	NA	None	NA	NA	NA	NA	NA	NA	NA	NA	0.55	Cases in <5yo per 100,000 population	6518	6167.27	6005.55	5855.64	5838.82	5878.82	5852.27	5858	5827.55	5881.09	5804.64	5819.45	5874.09	5862.91	5811.09
125	PEV (Pre-Erythrocytic Vaccine)	3	0.5	2	1	Infants	6, 10, &, 14 weeks	None	0.498525	0.69	0.85	0.85	NA	NA	5-17mo	0 yrs	None	0.7	0.81	0.93	0.93	NA	NA	None	NA	NA	NA	NA	NA	NA	NA	NA	0.55	Severe Cases in <5yo per 100,000 population	323.909	314.909	310	302.545	316.545	302.909	302.091	308.364	303.727	312.182	304.545	303.909	301.273	304.727	298.909
125	PEV (Pre-Erythrocytic Vaccine)	3	0.5	2	1	Infants	6, 10, &, 14 weeks	None	0.498525	0.69	0.85	0.85	NA	NA	5-17mo	0 yrs	None	0.7	0.81	0.93	0.93	NA	NA	None	NA	NA	NA	NA	NA	NA	NA	NA	0.55	Deaths in < 5yo per 100,000 population	80.6364	71.7273	77.7273	78	79.1818	76.9091	72.5455	76.8182	78.1818	77.6364	77.5455	71.3636	74.1818	79.3636	78.0909
125	PEV (Pre-Erythrocytic Vaccine)	3	0.5	2	1	Infants	6, 10, &, 14 weeks	None	0.498525	0.69	0.85	0.85	NA	NA	5-17mo	0 yrs	None	0.7	0.81	0.93	0.93	NA	NA	None	NA	NA	NA	NA	NA	NA	NA	NA	0.55	DALYs per 100,000 population	7592.53	7652.53	7472.45	7683.93	7685.85	7621.67	7597.72	7586.78	7684.89	7693.95	7479.56	7490.8	7582.83	7877.24	7732.06
125	PEV (Pre-Erythrocytic Vaccine)	3	0.5	2	1	Infants	6, 10, &, 14 weeks	None	0.498525	0.69	0.85	0.85	NA	NA	5-17mo	0 yrs	None	0.7	0.81	0.93	0.93	NA	NA	None	NA	NA	NA	NA	NA	NA	NA	NA	0.55	Income and productivity gains from delivering vaccine (US$ / dose)	0.0543887	0.19791	0.143088	0.511798	0.496332	0.528964	0.675942	0.552881	0.753799	0.855819	0.928308	0.893006	0.698575	0.642639	0.800832
126	PEV (Pre-Erythrocytic Vaccine)	3	0.5	2	1	Infants	6, 10, &, 14 weeks	None	0.498525	0.69	0.85	0.85	NA	NA	5-17mo	0 yrs	None	0.5	0.69	0.85	0.85	NA	NA	None	NA	NA	NA	NA	NA	NA	NA	NA	0.55	Cases per 100,000 population	85645.1	85157.7	85067.3	84647.6	84271.7	83794.5	83107.8	84081.9	83473.8	83202.1	84152.5	83962	84888.8	84071.5	83232.5
126	PEV (Pre-Erythrocytic Vaccine)	3	0.5	2	1	Infants	6, 10, &, 14 weeks	None	0.498525	0.69	0.85	0.85	NA	NA	5-17mo	0 yrs	None	0.5	0.69	0.85	0.85	NA	NA	None	NA	NA	NA	NA	NA	NA	NA	NA	0.55	Severe Cases per 100,000 population	1503.45	1483.55	1472.64	1463.45	1455.55	1450.55	1404.55	1470.91	1447.36	1450.73	1467.36	1482	1493.09	1451.64	1440.18
126	PEV (Pre-Erythrocytic Vaccine)	3	0.5	2	1	Infants	6, 10, &, 14 weeks	None	0.498525	0.69	0.85	0.85	NA	NA	5-17mo	0 yrs	None	0.5	0.69	0.85	0.85	NA	NA	None	NA	NA	NA	NA	NA	NA	NA	NA	0.55	Deaths per 100,000 population	308.727	294.455	297.455	301.818	306.727	293.727	294.091	304.727	292.364	296	296.273	303.727	297.909	292.636	294.091
126	PEV (Pre-Erythrocytic Vaccine)	3	0.5	2	1	Infants	6, 10, &, 14 weeks	None	0.498525	0.69	0.85	0.85	NA	NA	5-17mo	0 yrs	None	0.5	0.69	0.85	0.85	NA	NA	None	NA	NA	NA	NA	NA	NA	NA	NA	0.55	Cases in <5yo per 100,000 population	6563.73	6223.64	6044.45	5936.09	5926.45	5923.55	5819.45	5900	5904.64	5861.91	5862.55	5870.09	5967.55	5966.36	5835
126	PEV (Pre-Erythrocytic Vaccine)	3	0.5	2	1	Infants	6, 10, &, 14 weeks	None	0.498525	0.69	0.85	0.85	NA	NA	5-17mo	0 yrs	None	0.5	0.69	0.85	0.85	NA	NA	None	NA	NA	NA	NA	NA	NA	NA	NA	0.55	Severe Cases in <5yo per 100,000 population	334.091	318.636	310.364	313.182	305.273	304.455	304	311.909	304.364	296.818	313.091	305.909	322.091	301.182	292.455
126	PEV (Pre-Erythrocytic Vaccine)	3	0.5	2	1	Infants	6, 10, &, 14 weeks	None	0.498525	0.69	0.85	0.85	NA	NA	5-17mo	0 yrs	None	0.5	0.69	0.85	0.85	NA	NA	None	NA	NA	NA	NA	NA	NA	NA	NA	0.55	Deaths in < 5yo per 100,000 population	79.5455	72.3636	79.4545	71.7273	77.5455	72.8182	76.4545	75.7273	72.7273	72.3636	70	78.8182	69.3636	72.7273	76.7273
126	PEV (Pre-Erythrocytic Vaccine)	3	0.5	2	1	Infants	6, 10, &, 14 weeks	None	0.498525	0.69	0.85	0.85	NA	NA	5-17mo	0 yrs	None	0.5	0.69	0.85	0.85	NA	NA	None	NA	NA	NA	NA	NA	NA	NA	NA	0.55	DALYs per 100,000 population	7794.94	7507.49	7601.52	7650.25	7763.3	7476.44	7490.75	7740.59	7419.98	7564.91	7561.54	7731.41	7586.63	7481.33	7502.53
126	PEV (Pre-Erythrocytic Vaccine)	3	0.5	2	1	Infants	6, 10, &, 14 weeks	None	0.498525	0.69	0.85	0.85	NA	NA	5-17mo	0 yrs	None	0.5	0.69	0.85	0.85	NA	NA	None	NA	NA	NA	NA	NA	NA	NA	NA	0.55	Income and productivity gains from delivering vaccine (US$ / dose)	0.0392333	0.195597	0.221652	0.366692	0.505177	0.677965	0.930064	0.501236	0.707709	0.813839	0.494202	0.544677	0.242535	0.551408	0.837611
127	PEV (Pre-Erythrocytic Vaccine)	3	0.5	2	10	Infants	6, 10, &, 14 weeks	None	0.893855	0.95	0.97	0.97	NA	NA	5-17mo	0 yrs	None	0.89	0.95	0.97	0.97	NA	NA	None	NA	NA	NA	NA	NA	NA	NA	NA	0.55	Cases per 100,000 population	138174	135692	134962	134616	134359	134379	134468	134824	135309	135402	135774	136086	136617	136663	137115
127	PEV (Pre-Erythrocytic Vaccine)	3	0.5	2	10	Infants	6, 10, &, 14 weeks	None	0.893855	0.95	0.97	0.97	NA	NA	5-17mo	0 yrs	None	0.89	0.95	0.97	0.97	NA	NA	None	NA	NA	NA	NA	NA	NA	NA	NA	0.55	Severe Cases per 100,000 population	1727.36	1661.91	1669.18	1686.36	1709.09	1732.64	1760.36	1762.09	1782.18	1829.55	1804	1831.09	1844.64	1845.36	1863.55
127	PEV (Pre-Erythrocytic Vaccine)	3	0.5	2	10	Infants	6, 10, &, 14 weeks	None	0.893855	0.95	0.97	0.97	NA	NA	5-17mo	0 yrs	None	0.89	0.95	0.97	0.97	NA	NA	None	NA	NA	NA	NA	NA	NA	NA	NA	0.55	Deaths per 100,000 population	349.182	326.091	333.818	324.818	341.727	332.273	334	330.909	341.727	351.909	345.273	346.273	343.727	345.545	357.364
127	PEV (Pre-Erythrocytic Vaccine)	3	0.5	2	10	Infants	6, 10, &, 14 weeks	None	0.893855	0.95	0.97	0.97	NA	NA	5-17mo	0 yrs	None	0.89	0.95	0.97	0.97	NA	NA	None	NA	NA	NA	NA	NA	NA	NA	NA	0.55	Cases in <5yo per 100,000 population	28575.8	26478.1	25826	25494.5	25468.8	25592.7	25411.3	25326.5	25541.9	25454.5	25546.9	25557.4	25609.5	25532.1	25635.8
127	PEV (Pre-Erythrocytic Vaccine)	3	0.5	2	10	Infants	6, 10, &, 14 weeks	None	0.893855	0.95	0.97	0.97	NA	NA	5-17mo	0 yrs	None	0.89	0.95	0.97	0.97	NA	NA	None	NA	NA	NA	NA	NA	NA	NA	NA	0.55	Severe Cases in <5yo per 100,000 population	1098.55	1032.09	1048.73	1058	1056.91	1079.55	1072.36	1054.82	1069.73	1092.64	1066.82	1088.36	1104.64	1071.36	1107.73
127	PEV (Pre-Erythrocytic Vaccine)	3	0.5	2	10	Infants	6, 10, &, 14 weeks	None	0.893855	0.95	0.97	0.97	NA	NA	5-17mo	0 yrs	None	0.89	0.95	0.97	0.97	NA	NA	None	NA	NA	NA	NA	NA	NA	NA	NA	0.55	Deaths in < 5yo per 100,000 population	220	202.818	205.545	197.909	207.182	202.545	202.636	196.273	205.091	211.818	208.273	205.545	201.727	199.727	208.636
127	PEV (Pre-Erythrocytic Vaccine)	3	0.5	2	10	Infants	6, 10, &, 14 weeks	None	0.893855	0.95	0.97	0.97	NA	NA	5-17mo	0 yrs	None	0.89	0.95	0.97	0.97	NA	NA	None	NA	NA	NA	NA	NA	NA	NA	NA	0.55	DALYs per 100,000 population	9478.97	8853.14	9065.69	8830.4	9255.01	9036.66	9055.52	9022.45	9281.66	9578.54	9388.25	9436.31	9337.47	9418.53	9652.78
127	PEV (Pre-Erythrocytic Vaccine)	3	0.5	2	10	Infants	6, 10, &, 14 weeks	None	0.893855	0.95	0.97	0.97	NA	NA	5-17mo	0 yrs	None	0.89	0.95	0.97	0.97	NA	NA	None	NA	NA	NA	NA	NA	NA	NA	NA	0.55	Income and productivity gains from delivering vaccine (US$ / dose)	0.221177	0.678108	0.763015	0.792965	0.838239	0.818722	0.75737	0.682868	0.595334	0.5249	0.465156	0.40944	0.268042	0.243832	0.134036
128	PEV (Pre-Erythrocytic Vaccine)	3	0.5	2	10	Infants	6, 10, &, 14 weeks	None	0.893855	0.95	0.97	0.97	NA	NA	5-17mo	0 yrs	None	0.7	0.81	0.93	0.93	NA	NA	None	NA	NA	NA	NA	NA	NA	NA	NA	0.55	Cases per 100,000 population	138199	135711	134915	134857	134507	134397	134387	134831	135115	135406	135761	136077	136631	136741	136816
128	PEV (Pre-Erythrocytic Vaccine)	3	0.5	2	10	Infants	6, 10, &, 14 weeks	None	0.893855	0.95	0.97	0.97	NA	NA	5-17mo	0 yrs	None	0.7	0.81	0.93	0.93	NA	NA	None	NA	NA	NA	NA	NA	NA	NA	NA	0.55	Severe Cases per 100,000 population	1733.27	1657.18	1664	1689.73	1720.64	1734.73	1760.36	1771	1781.91	1797.27	1782.55	1840.73	1846.36	1808.64	1837.55
128	PEV (Pre-Erythrocytic Vaccine)	3	0.5	2	10	Infants	6, 10, &, 14 weeks	None	0.893855	0.95	0.97	0.97	NA	NA	5-17mo	0 yrs	None	0.7	0.81	0.93	0.93	NA	NA	None	NA	NA	NA	NA	NA	NA	NA	NA	0.55	Deaths per 100,000 population	343.909	331.727	329.182	324.091	332.727	345.364	347.273	344.455	350.727	355.273	345.636	350.182	351.636	355	350
128	PEV (Pre-Erythrocytic Vaccine)	3	0.5	2	10	Infants	6, 10, &, 14 weeks	None	0.893855	0.95	0.97	0.97	NA	NA	5-17mo	0 yrs	None	0.7	0.81	0.93	0.93	NA	NA	None	NA	NA	NA	NA	NA	NA	NA	NA	0.55	Cases in <5yo per 100,000 population	28625.3	26536.1	25924.7	25610.7	25506.7	25329.5	25263.9	25405.3	25433.4	25453.6	25450.3	25511.1	25587.8	25594.5	25466.1
128	PEV (Pre-Erythrocytic Vaccine)	3	0.5	2	10	Infants	6, 10, &, 14 weeks	None	0.893855	0.95	0.97	0.97	NA	NA	5-17mo	0 yrs	None	0.7	0.81	0.93	0.93	NA	NA	None	NA	NA	NA	NA	NA	NA	NA	NA	0.55	Severe Cases in <5yo per 100,000 population	1103.45	1033	1032.91	1065.18	1069.91	1068.55	1083.55	1070.82	1068.55	1080.18	1056.09	1094.18	1097.55	1072.45	1083.36
128	PEV (Pre-Erythrocytic Vaccine)	3	0.5	2	10	Infants	6, 10, &, 14 weeks	None	0.893855	0.95	0.97	0.97	NA	NA	5-17mo	0 yrs	None	0.7	0.81	0.93	0.93	NA	NA	None	NA	NA	NA	NA	NA	NA	NA	NA	0.55	Deaths in < 5yo per 100,000 population	218.091	207.273	201.455	198.364	204.182	211.727	209	206.455	207.091	209.455	202.909	206.909	207.182	210.455	205.182
128	PEV (Pre-Erythrocytic Vaccine)	3	0.5	2	10	Infants	6, 10, &, 14 weeks	None	0.893855	0.95	0.97	0.97	NA	NA	5-17mo	0 yrs	None	0.7	0.81	0.93	0.93	NA	NA	None	NA	NA	NA	NA	NA	NA	NA	NA	0.55	DALYs per 100,000 population	9319.48	8979.44	8941.78	8786.26	9037.22	9387.21	9416.46	9373.63	9492	9610.16	9368.3	9535.11	9558.26	9617.78	9507.72
128	PEV (Pre-Erythrocytic Vaccine)	3	0.5	2	10	Infants	6, 10, &, 14 weeks	None	0.893855	0.95	0.97	0.97	NA	NA	5-17mo	0 yrs	None	0.7	0.81	0.93	0.93	NA	NA	None	NA	NA	NA	NA	NA	NA	NA	NA	0.55	Income and productivity gains from delivering vaccine (US$ / dose)	0.220796	0.694547	0.779666	0.754019	0.806953	0.798627	0.770681	0.700686	0.613598	0.556733	0.475364	0.386993	0.258271	0.255495	0.193141
129	PEV (Pre-Erythrocytic Vaccine)	3	0.5	2	10	Infants	6, 10, &, 14 weeks	None	0.893855	0.95	0.97	0.97	NA	NA	5-17mo	0 yrs	None	0.5	0.69	0.85	0.85	NA	NA	None	NA	NA	NA	NA	NA	NA	NA	NA	0.55	Cases per 100,000 population	138433	135930	135085	134534	134531	134623	134383	134827	135103	135536	135617	135893	136263	136668	136991
129	PEV (Pre-Erythrocytic Vaccine)	3	0.5	2	10	Infants	6, 10, &, 14 weeks	None	0.893855	0.95	0.97	0.97	NA	NA	5-17mo	0 yrs	None	0.5	0.69	0.85	0.85	NA	NA	None	NA	NA	NA	NA	NA	NA	NA	NA	0.55	Severe Cases per 100,000 population	1760.27	1681.73	1667.36	1689.91	1688.91	1752.45	1747.36	1771.73	1788.18	1805.91	1806.09	1831.64	1805	1843	1854.09
129	PEV (Pre-Erythrocytic Vaccine)	3	0.5	2	10	Infants	6, 10, &, 14 weeks	None	0.893855	0.95	0.97	0.97	NA	NA	5-17mo	0 yrs	None	0.5	0.69	0.85	0.85	NA	NA	None	NA	NA	NA	NA	NA	NA	NA	NA	0.55	Deaths per 100,000 population	354.727	336.182	330.364	330.909	326.091	334.727	332.909	339.818	343.273	346.727	350.636	353.455	346	344.455	358.545
129	PEV (Pre-Erythrocytic Vaccine)	3	0.5	2	10	Infants	6, 10, &, 14 weeks	None	0.893855	0.95	0.97	0.97	NA	NA	5-17mo	0 yrs	None	0.5	0.69	0.85	0.85	NA	NA	None	NA	NA	NA	NA	NA	NA	NA	NA	0.55	Cases in <5yo per 100,000 population	28840.5	26760.5	26007.1	25569.1	25499.5	25580.9	25398.8	25513.2	25519.3	25505	25542.6	25547.6	25487.7	25543	25582.3
129	PEV (Pre-Erythrocytic Vaccine)	3	0.5	2	10	Infants	6, 10, &, 14 weeks	None	0.893855	0.95	0.97	0.97	NA	NA	5-17mo	0 yrs	None	0.5	0.69	0.85	0.85	NA	NA	None	NA	NA	NA	NA	NA	NA	NA	NA	0.55	Severe Cases in <5yo per 100,000 population	1134.82	1051.36	1048.91	1060.45	1056.18	1094.18	1069.18	1083.36	1067.73	1079.82	1075.91	1084.18	1070.82	1086.73	1099.64
129	PEV (Pre-Erythrocytic Vaccine)	3	0.5	2	10	Infants	6, 10, &, 14 weeks	None	0.893855	0.95	0.97	0.97	NA	NA	5-17mo	0 yrs	None	0.5	0.69	0.85	0.85	NA	NA	None	NA	NA	NA	NA	NA	NA	NA	NA	0.55	Deaths in < 5yo per 100,000 population	226.182	202.091	208	207.182	200	206.182	198.818	204.091	204.636	209.273	204.545	210.636	207.091	203.727	207.455
129	PEV (Pre-Erythrocytic Vaccine)	3	0.5	2	10	Infants	6, 10, &, 14 weeks	None	0.893855	0.95	0.97	0.97	NA	NA	5-17mo	0 yrs	None	0.5	0.69	0.85	0.85	NA	NA	None	NA	NA	NA	NA	NA	NA	NA	NA	0.55	DALYs per 100,000 population	9645.27	9106.78	8972.59	8993.61	8868.65	9116.16	9048.39	9236.35	9347.53	9416.03	9499.77	9620.62	9404.54	9368.61	9711.57
129	PEV (Pre-Erythrocytic Vaccine)	3	0.5	2	10	Infants	6, 10, &, 14 weeks	None	0.893855	0.95	0.97	0.97	NA	NA	5-17mo	0 yrs	None	0.5	0.69	0.85	0.85	NA	NA	None	NA	NA	NA	NA	NA	NA	NA	NA	0.55	Income and productivity gains from delivering vaccine (US$ / dose)	0.212782	0.653802	0.756861	0.827807	0.810398	0.761445	0.799418	0.711764	0.636386	0.520704	0.511749	0.447599	0.343425	0.270934	0.172985
130	PEV (Pre-Erythrocytic Vaccine)	3	0.5	2	10	Infants	6, 10, &, 14 weeks	None	0.700569	0.81	0.93	0.93	NA	NA	5-17mo	0 yrs	None	0.89	0.95	0.97	0.97	NA	NA	None	NA	NA	NA	NA	NA	NA	NA	NA	0.55	Cases per 100,000 population	138094	136057	135800	135868	135230	135515	135621	135985	135954	136525	136818	136987	137297	137334	137674
130	PEV (Pre-Erythrocytic Vaccine)	3	0.5	2	10	Infants	6, 10, &, 14 weeks	None	0.700569	0.81	0.93	0.93	NA	NA	5-17mo	0 yrs	None	0.89	0.95	0.97	0.97	NA	NA	None	NA	NA	NA	NA	NA	NA	NA	NA	0.55	Severe Cases per 100,000 population	1744.55	1703.82	1728.73	1731.36	1726.91	1761.91	1784.09	1816.18	1799.55	1808.91	1806.09	1829.64	1846.82	1799.82	1835.18
130	PEV (Pre-Erythrocytic Vaccine)	3	0.5	2	10	Infants	6, 10, &, 14 weeks	None	0.700569	0.81	0.93	0.93	NA	NA	5-17mo	0 yrs	None	0.89	0.95	0.97	0.97	NA	NA	None	NA	NA	NA	NA	NA	NA	NA	NA	0.55	Deaths per 100,000 population	357.818	331.364	333.091	339.273	333.091	339	354.091	349.091	348.364	347.273	352.727	354.636	356.273	354.636	357.273
130	PEV (Pre-Erythrocytic Vaccine)	3	0.5	2	10	Infants	6, 10, &, 14 weeks	None	0.700569	0.81	0.93	0.93	NA	NA	5-17mo	0 yrs	None	0.89	0.95	0.97	0.97	NA	NA	None	NA	NA	NA	NA	NA	NA	NA	NA	0.55	Cases in <5yo per 100,000 population	28601.5	26911.1	26643.5	26561.4	26324.5	26406.9	26436.6	26390	26480.9	26474.9	26514.9	26502	26507.4	26479.6	26621.8
130	PEV (Pre-Erythrocytic Vaccine)	3	0.5	2	10	Infants	6, 10, &, 14 weeks	None	0.700569	0.81	0.93	0.93	NA	NA	5-17mo	0 yrs	None	0.89	0.95	0.97	0.97	NA	NA	None	NA	NA	NA	NA	NA	NA	NA	NA	0.55	Severe Cases in <5yo per 100,000 population	1100.82	1065.73	1087.18	1105.82	1089.45	1101.82	1099.73	1117.09	1096.73	1098.09	1098.27	1113.91	1121.91	1090.09	1103.73
130	PEV (Pre-Erythrocytic Vaccine)	3	0.5	2	10	Infants	6, 10, &, 14 weeks	None	0.700569	0.81	0.93	0.93	NA	NA	5-17mo	0 yrs	None	0.89	0.95	0.97	0.97	NA	NA	None	NA	NA	NA	NA	NA	NA	NA	NA	0.55	Deaths in < 5yo per 100,000 population	226.091	204.273	206.455	212.818	209.818	208.364	222.182	215.364	206.545	211.636	212.818	216.909	215.727	216.727	219.818
130	PEV (Pre-Erythrocytic Vaccine)	3	0.5	2	10	Infants	6, 10, &, 14 weeks	None	0.700569	0.81	0.93	0.93	NA	NA	5-17mo	0 yrs	None	0.89	0.95	0.97	0.97	NA	NA	None	NA	NA	NA	NA	NA	NA	NA	NA	0.55	DALYs per 100,000 population	9708.14	9018.64	9052.42	9216.43	9065.08	9237.62	9594.3	9431	9495.86	9441.54	9556.94	9626.67	9645.92	9624.99	9701.76
130	PEV (Pre-Erythrocytic Vaccine)	3	0.5	2	10	Infants	6, 10, &, 14 weeks	None	0.700569	0.81	0.93	0.93	NA	NA	5-17mo	0 yrs	None	0.89	0.95	0.97	0.97	NA	NA	None	NA	NA	NA	NA	NA	NA	NA	NA	0.55	Income and productivity gains from delivering vaccine (US$ / dose)	0.258175	0.76898	0.782303	0.729407	0.893464	0.788263	0.751471	0.642162	0.65664	0.492602	0.434931	0.375286	0.263528	0.288387	0.171416
131	PEV (Pre-Erythrocytic Vaccine)	3	0.5	2	10	Infants	6, 10, &, 14 weeks	None	0.700569	0.81	0.93	0.93	NA	NA	5-17mo	0 yrs	None	0.7	0.81	0.93	0.93	NA	NA	None	NA	NA	NA	NA	NA	NA	NA	NA	0.55	Cases per 100,000 population	138221	136183	135890	135618	135428	135412	135419	135896	136038	136411	136732	136870	137325	137567	137603
131	PEV (Pre-Erythrocytic Vaccine)	3	0.5	2	10	Infants	6, 10, &, 14 weeks	None	0.700569	0.81	0.93	0.93	NA	NA	5-17mo	0 yrs	None	0.7	0.81	0.93	0.93	NA	NA	None	NA	NA	NA	NA	NA	NA	NA	NA	0.55	Severe Cases per 100,000 population	1761.73	1681.82	1713.91	1724.64	1757.82	1774.18	1803.18	1812.73	1813.09	1812.64	1801.45	1805.73	1825.45	1831.64	1827.09
131	PEV (Pre-Erythrocytic Vaccine)	3	0.5	2	10	Infants	6, 10, &, 14 weeks	None	0.700569	0.81	0.93	0.93	NA	NA	5-17mo	0 yrs	None	0.7	0.81	0.93	0.93	NA	NA	None	NA	NA	NA	NA	NA	NA	NA	NA	0.55	Deaths per 100,000 population	357.545	333.182	337	335.909	337.545	336.455	349.545	355.909	355.455	351.545	344.636	353.636	352.273	360.545	357.182
131	PEV (Pre-Erythrocytic Vaccine)	3	0.5	2	10	Infants	6, 10, &, 14 weeks	None	0.700569	0.81	0.93	0.93	NA	NA	5-17mo	0 yrs	None	0.7	0.81	0.93	0.93	NA	NA	None	NA	NA	NA	NA	NA	NA	NA	NA	0.55	Cases in <5yo per 100,000 population	28771.2	26953	26735.4	26403.5	26512.5	26343.4	26347.7	26401.6	26378.2	26409.5	26457.3	26496.1	26524.7	26540.2	26514.5
131	PEV (Pre-Erythrocytic Vaccine)	3	0.5	2	10	Infants	6, 10, &, 14 weeks	None	0.700569	0.81	0.93	0.93	NA	NA	5-17mo	0 yrs	None	0.7	0.81	0.93	0.93	NA	NA	None	NA	NA	NA	NA	NA	NA	NA	NA	0.55	Severe Cases in <5yo per 100,000 population	1116.82	1048.45	1073.45	1089.45	1104.55	1114.91	1105	1124.36	1096.64	1101.55	1086.45	1094.36	1098.09	1100.73	1093.91
131	PEV (Pre-Erythrocytic Vaccine)	3	0.5	2	10	Infants	6, 10, &, 14 weeks	None	0.700569	0.81	0.93	0.93	NA	NA	5-17mo	0 yrs	None	0.7	0.81	0.93	0.93	NA	NA	None	NA	NA	NA	NA	NA	NA	NA	NA	0.55	Deaths in < 5yo per 100,000 population	230	205.909	208.273	207.545	207.818	211.364	212.455	223.455	214.273	210.182	210.909	212.727	207.545	213.091	212.273
131	PEV (Pre-Erythrocytic Vaccine)	3	0.5	2	10	Infants	6, 10, &, 14 weeks	None	0.700569	0.81	0.93	0.93	NA	NA	5-17mo	0 yrs	None	0.7	0.81	0.93	0.93	NA	NA	None	NA	NA	NA	NA	NA	NA	NA	NA	0.55	DALYs per 100,000 population	9710.1	9049.21	9181.43	9116.7	9151.44	9180.02	9496.31	9654.02	9633.78	9539.04	9357.73	9626.33	9546.81	9759.57	9673.95
131	PEV (Pre-Erythrocytic Vaccine)	3	0.5	2	10	Infants	6, 10, &, 14 weeks	None	0.700569	0.81	0.93	0.93	NA	NA	5-17mo	0 yrs	None	0.7	0.81	0.93	0.93	NA	NA	None	NA	NA	NA	NA	NA	NA	NA	NA	0.55	Income and productivity gains from delivering vaccine (US$ / dose)	0.251997	0.770455	0.758216	0.78532	0.837391	0.800377	0.772136	0.673464	0.611753	0.514559	0.450704	0.424883	0.281198	0.221451	0.181865
132	PEV (Pre-Erythrocytic Vaccine)	3	0.5	2	10	Infants	6, 10, &, 14 weeks	None	0.700569	0.81	0.93	0.93	NA	NA	5-17mo	0 yrs	None	0.5	0.69	0.85	0.85	NA	NA	None	NA	NA	NA	NA	NA	NA	NA	NA	0.55	Cases per 100,000 population	138632	136528	136045	135524	135656	135599	135621	135892	136079	136351	136998	136819	137209	137283	137528
132	PEV (Pre-Erythrocytic Vaccine)	3	0.5	2	10	Infants	6, 10, &, 14 weeks	None	0.700569	0.81	0.93	0.93	NA	NA	5-17mo	0 yrs	None	0.5	0.69	0.85	0.85	NA	NA	None	NA	NA	NA	NA	NA	NA	NA	NA	0.55	Severe Cases per 100,000 population	1752.36	1725.27	1712.73	1723.45	1741.55	1753.27	1780.36	1783.73	1836.18	1835	1813.09	1804.82	1812.18	1845.27	1845.36
132	PEV (Pre-Erythrocytic Vaccine)	3	0.5	2	10	Infants	6, 10, &, 14 weeks	None	0.700569	0.81	0.93	0.93	NA	NA	5-17mo	0 yrs	None	0.5	0.69	0.85	0.85	NA	NA	None	NA	NA	NA	NA	NA	NA	NA	NA	0.55	Deaths per 100,000 population	353.727	343.727	334.273	340	347.727	338.455	339.727	353.273	358	352.727	347.273	352.727	344.545	368.818	353.091
132	PEV (Pre-Erythrocytic Vaccine)	3	0.5	2	10	Infants	6, 10, &, 14 weeks	None	0.700569	0.81	0.93	0.93	NA	NA	5-17mo	0 yrs	None	0.5	0.69	0.85	0.85	NA	NA	None	NA	NA	NA	NA	NA	NA	NA	NA	0.55	Cases in <5yo per 100,000 population	28939.8	27177.3	26849	26416.4	26562.1	26463.6	26417.7	26422.7	26396.4	26463.6	26563.5	26435.5	26622.9	26510.5	26436.6
132	PEV (Pre-Erythrocytic Vaccine)	3	0.5	2	10	Infants	6, 10, &, 14 weeks	None	0.700569	0.81	0.93	0.93	NA	NA	5-17mo	0 yrs	None	0.5	0.69	0.85	0.85	NA	NA	None	NA	NA	NA	NA	NA	NA	NA	NA	0.55	Severe Cases in <5yo per 100,000 population	1122.36	1087	1086.09	1084.36	1095.91	1090	1112.73	1099.18	1122.36	1126.55	1099.55	1110.36	1102.64	1103.18	1107.55
132	PEV (Pre-Erythrocytic Vaccine)	3	0.5	2	10	Infants	6, 10, &, 14 weeks	None	0.700569	0.81	0.93	0.93	NA	NA	5-17mo	0 yrs	None	0.5	0.69	0.85	0.85	NA	NA	None	NA	NA	NA	NA	NA	NA	NA	NA	0.55	Deaths in < 5yo per 100,000 population	228.818	213	209.364	214.364	221.182	209.636	217.455	220.636	221.909	213	209.818	218	208.636	216.182	215.818
132	PEV (Pre-Erythrocytic Vaccine)	3	0.5	2	10	Infants	6, 10, &, 14 weeks	None	0.700569	0.81	0.93	0.93	NA	NA	5-17mo	0 yrs	None	0.5	0.69	0.85	0.85	NA	NA	None	NA	NA	NA	NA	NA	NA	NA	NA	0.55	DALYs per 100,000 population	9593.96	9334.25	9050.94	9216.54	9437.31	9185.76	9258.18	9592.23	9703.72	9581.21	9424.63	9542.4	9367.09	10030.4	9610.58
132	PEV (Pre-Erythrocytic Vaccine)	3	0.5	2	10	Infants	6, 10, &, 14 weeks	None	0.700569	0.81	0.93	0.93	NA	NA	5-17mo	0 yrs	None	0.5	0.69	0.85	0.85	NA	NA	None	NA	NA	NA	NA	NA	NA	NA	NA	0.55	Income and productivity gains from delivering vaccine (US$ / dose)	0.21098	0.651032	0.769682	0.833679	0.794809	0.790573	0.740507	0.709005	0.583803	0.530584	0.372369	0.414387	0.335187	0.275844	0.183723
133	PEV (Pre-Erythrocytic Vaccine)	3	0.5	2	10	Infants	6, 10, &, 14 weeks	None	0.498525	0.69	0.85	0.85	NA	NA	5-17mo	0 yrs	None	0.89	0.95	0.97	0.97	NA	NA	None	NA	NA	NA	NA	NA	NA	NA	NA	0.55	Cases per 100,000 population	137970	136485	136660	136312	136474	136323	136557	137034	137385	137284	137700	137775	138221	138285	138272
133	PEV (Pre-Erythrocytic Vaccine)	3	0.5	2	10	Infants	6, 10, &, 14 weeks	None	0.498525	0.69	0.85	0.85	NA	NA	5-17mo	0 yrs	None	0.89	0.95	0.97	0.97	NA	NA	None	NA	NA	NA	NA	NA	NA	NA	NA	0.55	Severe Cases per 100,000 population	1764.73	1705.91	1716.55	1753.64	1784.64	1790.45	1797.91	1829.82	1815.55	1842.64	1838.36	1858.45	1833.73	1852.36	1844.45
133	PEV (Pre-Erythrocytic Vaccine)	3	0.5	2	10	Infants	6, 10, &, 14 weeks	None	0.498525	0.69	0.85	0.85	NA	NA	5-17mo	0 yrs	None	0.89	0.95	0.97	0.97	NA	NA	None	NA	NA	NA	NA	NA	NA	NA	NA	0.55	Deaths per 100,000 population	355.091	349.545	343.455	345.727	351.455	341.909	345.909	347.091	357.273	364.364	362.545	350.545	365.182	355.182	349.182
133	PEV (Pre-Erythrocytic Vaccine)	3	0.5	2	10	Infants	6, 10, &, 14 weeks	None	0.498525	0.69	0.85	0.85	NA	NA	5-17mo	0 yrs	None	0.89	0.95	0.97	0.97	NA	NA	None	NA	NA	NA	NA	NA	NA	NA	NA	0.55	Cases in <5yo per 100,000 population	28620.3	27396	27271.3	27150.4	27389.8	27282.4	27321.6	27408.9	27449.7	27369.1	27445.2	27421.5	27460	27483.1	27430.8
133	PEV (Pre-Erythrocytic Vaccine)	3	0.5	2	10	Infants	6, 10, &, 14 weeks	None	0.498525	0.69	0.85	0.85	NA	NA	5-17mo	0 yrs	None	0.89	0.95	0.97	0.97	NA	NA	None	NA	NA	NA	NA	NA	NA	NA	NA	0.55	Severe Cases in <5yo per 100,000 population	1115.45	1079.73	1094.55	1117.64	1140.73	1129.91	1124.36	1151.64	1124.91	1147	1125.09	1158.45	1130.64	1146.82	1132.64
133	PEV (Pre-Erythrocytic Vaccine)	3	0.5	2	10	Infants	6, 10, &, 14 weeks	None	0.498525	0.69	0.85	0.85	NA	NA	5-17mo	0 yrs	None	0.89	0.95	0.97	0.97	NA	NA	None	NA	NA	NA	NA	NA	NA	NA	NA	0.55	Deaths in < 5yo per 100,000 population	219	220.091	217.545	217.273	222.364	218.636	212.636	218.636	224.455	225.818	225.909	214.455	227.273	220.364	208
133	PEV (Pre-Erythrocytic Vaccine)	3	0.5	2	10	Infants	6, 10, &, 14 weeks	None	0.498525	0.69	0.85	0.85	NA	NA	5-17mo	0 yrs	None	0.89	0.95	0.97	0.97	NA	NA	None	NA	NA	NA	NA	NA	NA	NA	NA	0.55	DALYs per 100,000 population	9630.15	9481.82	9270.36	9386.47	9499.68	9304.7	9403.52	9443.68	9706.61	9903.14	9812.77	9530.21	9894.39	9628.94	9468.5
133	PEV (Pre-Erythrocytic Vaccine)	3	0.5	2	10	Infants	6, 10, &, 14 weeks	None	0.498525	0.69	0.85	0.85	NA	NA	5-17mo	0 yrs	None	0.89	0.95	0.97	0.97	NA	NA	None	NA	NA	NA	NA	NA	NA	NA	NA	0.55	Income and productivity gains from delivering vaccine (US$ / dose)	0.313836	0.886398	0.8111	0.869112	0.812247	0.84552	0.762904	0.611901	0.504783	0.50527	0.376769	0.356932	0.207409	0.16988	0.144023
134	PEV (Pre-Erythrocytic Vaccine)	3	0.5	2	10	Infants	6, 10, &, 14 weeks	None	0.498525	0.69	0.85	0.85	NA	NA	5-17mo	0 yrs	None	0.7	0.81	0.93	0.93	NA	NA	None	NA	NA	NA	NA	NA	NA	NA	NA	0.55	Cases per 100,000 population	138207	136800	136599	136714	136359	136681	136690	137089	137019	137528	137564	137861	137925	138237	138094
134	PEV (Pre-Erythrocytic Vaccine)	3	0.5	2	10	Infants	6, 10, &, 14 weeks	None	0.498525	0.69	0.85	0.85	NA	NA	5-17mo	0 yrs	None	0.7	0.81	0.93	0.93	NA	NA	None	NA	NA	NA	NA	NA	NA	NA	NA	0.55	Severe Cases per 100,000 population	1746.45	1746.55	1733.45	1771.18	1783.36	1795.27	1787.91	1796.64	1819.82	1840.73	1841.36	1839.18	1830.09	1853.45	1852.64
134	PEV (Pre-Erythrocytic Vaccine)	3	0.5	2	10	Infants	6, 10, &, 14 weeks	None	0.498525	0.69	0.85	0.85	NA	NA	5-17mo	0 yrs	None	0.7	0.81	0.93	0.93	NA	NA	None	NA	NA	NA	NA	NA	NA	NA	NA	0.55	Deaths per 100,000 population	356	345.455	344.182	336.364	344.545	354.818	359.091	343.455	358.727	363	351.091	363.636	346.727	357.818	352.455
134	PEV (Pre-Erythrocytic Vaccine)	3	0.5	2	10	Infants	6, 10, &, 14 weeks	None	0.498525	0.69	0.85	0.85	NA	NA	5-17mo	0 yrs	None	0.7	0.81	0.93	0.93	NA	NA	None	NA	NA	NA	NA	NA	NA	NA	NA	0.55	Cases in <5yo per 100,000 population	28782.3	27469.1	27396.6	27334.3	27366.6	27497.5	27370.6	27445.3	27417.8	27460.2	27342.4	27440.7	27368.7	27525.5	27456.7
134	PEV (Pre-Erythrocytic Vaccine)	3	0.5	2	10	Infants	6, 10, &, 14 weeks	None	0.498525	0.69	0.85	0.85	NA	NA	5-17mo	0 yrs	None	0.7	0.81	0.93	0.93	NA	NA	None	NA	NA	NA	NA	NA	NA	NA	NA	0.55	Severe Cases in <5yo per 100,000 population	1109.73	1108.45	1108.09	1129.09	1138	1124.45	1126.64	1137.45	1136.27	1124.91	1136.82	1138.09	1126.91	1142.91	1144.36
134	PEV (Pre-Erythrocytic Vaccine)	3	0.5	2	10	Infants	6, 10, &, 14 weeks	None	0.498525	0.69	0.85	0.85	NA	NA	5-17mo	0 yrs	None	0.7	0.81	0.93	0.93	NA	NA	None	NA	NA	NA	NA	NA	NA	NA	NA	0.55	Deaths in < 5yo per 100,000 population	225.273	213.818	214.273	211.636	222.727	224.182	225.727	211	219.818	223.273	212.636	224	212.182	217.727	213
134	PEV (Pre-Erythrocytic Vaccine)	3	0.5	2	10	Infants	6, 10, &, 14 weeks	None	0.498525	0.69	0.85	0.85	NA	NA	5-17mo	0 yrs	None	0.7	0.81	0.93	0.93	NA	NA	None	NA	NA	NA	NA	NA	NA	NA	NA	0.55	DALYs per 100,000 population	9657.1	9353.85	9354.54	9150	9344.92	9627.08	9708.12	9328.89	9731	9863.22	9537.82	9831.96	9438.47	9738.34	9550.6
134	PEV (Pre-Erythrocytic Vaccine)	3	0.5	2	10	Infants	6, 10, &, 14 weeks	None	0.498525	0.69	0.85	0.85	NA	NA	5-17mo	0 yrs	None	0.7	0.81	0.93	0.93	NA	NA	None	NA	NA	NA	NA	NA	NA	NA	NA	0.55	Income and productivity gains from delivering vaccine (US$ / dose)	0.295125	0.774347	0.836826	0.732185	0.867051	0.765324	0.749884	0.628918	0.597761	0.42372	0.400506	0.339926	0.306257	0.192511	0.200716
135	PEV (Pre-Erythrocytic Vaccine)	3	0.5	2	10	Infants	6, 10, &, 14 weeks	None	0.498525	0.69	0.85	0.85	NA	NA	5-17mo	0 yrs	None	0.5	0.69	0.85	0.85	NA	NA	None	NA	NA	NA	NA	NA	NA	NA	NA	0.55	Cases per 100,000 population	138590	137180	136658	136485	136603	136543	136718	136898	137531	137431	137633	137801	138169	138105	138325
135	PEV (Pre-Erythrocytic Vaccine)	3	0.5	2	10	Infants	6, 10, &, 14 weeks	None	0.498525	0.69	0.85	0.85	NA	NA	5-17mo	0 yrs	None	0.5	0.69	0.85	0.85	NA	NA	None	NA	NA	NA	NA	NA	NA	NA	NA	0.55	Severe Cases per 100,000 population	1748.82	1730	1747	1749	1777.45	1813.18	1796.09	1825.18	1852	1824.55	1808.18	1850	1837.73	1867.64	1830.91
135	PEV (Pre-Erythrocytic Vaccine)	3	0.5	2	10	Infants	6, 10, &, 14 weeks	None	0.498525	0.69	0.85	0.85	NA	NA	5-17mo	0 yrs	None	0.5	0.69	0.85	0.85	NA	NA	None	NA	NA	NA	NA	NA	NA	NA	NA	0.55	Deaths per 100,000 population	358.364	344.364	346.818	338.182	352.364	353.909	362	358.455	363	344.636	352.455	363.818	358.182	361.545	351.545
135	PEV (Pre-Erythrocytic Vaccine)	3	0.5	2	10	Infants	6, 10, &, 14 weeks	None	0.498525	0.69	0.85	0.85	NA	NA	5-17mo	0 yrs	None	0.5	0.69	0.85	0.85	NA	NA	None	NA	NA	NA	NA	NA	NA	NA	NA	0.55	Cases in <5yo per 100,000 population	29065.2	27781.9	27435.5	27398.5	27414.4	27478	27396.7	27342.5	27466.5	27510.5	27473.3	27495.7	27517.8	27467.3	27484.6
135	PEV (Pre-Erythrocytic Vaccine)	3	0.5	2	10	Infants	6, 10, &, 14 weeks	None	0.498525	0.69	0.85	0.85	NA	NA	5-17mo	0 yrs	None	0.5	0.69	0.85	0.85	NA	NA	None	NA	NA	NA	NA	NA	NA	NA	NA	0.55	Severe Cases in <5yo per 100,000 population	1122.82	1097.55	1104.09	1121.09	1139.64	1153.82	1129.09	1143.45	1142	1127	1121.64	1141.27	1132.55	1152.55	1135.45
135	PEV (Pre-Erythrocytic Vaccine)	3	0.5	2	10	Infants	6, 10, &, 14 weeks	None	0.498525	0.69	0.85	0.85	NA	NA	5-17mo	0 yrs	None	0.5	0.69	0.85	0.85	NA	NA	None	NA	NA	NA	NA	NA	NA	NA	NA	0.55	Deaths in < 5yo per 100,000 population	224.364	216.727	221.455	216.182	223.545	220.909	229.091	224.091	222.545	213.636	224.455	226	218.545	222.091	210.818
135	PEV (Pre-Erythrocytic Vaccine)	3	0.5	2	10	Infants	6, 10, &, 14 weeks	None	0.498525	0.69	0.85	0.85	NA	NA	5-17mo	0 yrs	None	0.5	0.69	0.85	0.85	NA	NA	None	NA	NA	NA	NA	NA	NA	NA	NA	0.55	DALYs per 100,000 population	9723.3	9335.84	9409.99	9162.95	9523.6	9593.49	9797.83	9746.17	9907.74	9346.28	9618.45	9868.45	9716	9832.28	9550.58
135	PEV (Pre-Erythrocytic Vaccine)	3	0.5	2	10	Infants	6, 10, &, 14 weeks	None	0.498525	0.69	0.85	0.85	NA	NA	5-17mo	0 yrs	None	0.5	0.69	0.85	0.85	NA	NA	None	NA	NA	NA	NA	NA	NA	NA	NA	0.55	Income and productivity gains from delivering vaccine (US$ / dose)	0.264065	0.707079	0.809208	0.854862	0.798621	0.805881	0.729347	0.640323	0.434171	0.485523	0.411536	0.342595	0.206339	0.216984	0.171499
136	PEV (Pre-Erythrocytic Vaccine)	3	0.5	2	100	Infants	6, 10, &, 14 weeks	None	0.893855	0.95	0.97	0.97	NA	NA	5-17mo	0 yrs	None	0.89	0.95	0.97	0.97	NA	NA	None	NA	NA	NA	NA	NA	NA	NA	NA	0.55	Cases per 100,000 population	107927	107035	107548	108642	109920	111053	112154	113144	113706	114420	114906	115107	115484	115515	115657
136	PEV (Pre-Erythrocytic Vaccine)	3	0.5	2	100	Infants	6, 10, &, 14 weeks	None	0.893855	0.95	0.97	0.97	NA	NA	5-17mo	0 yrs	None	0.89	0.95	0.97	0.97	NA	NA	None	NA	NA	NA	NA	NA	NA	NA	NA	0.55	Severe Cases per 100,000 population	1395.62	1454.92	1530.15	1568.15	1624.31	1635.38	1672.54	1668.77	1673.08	1672.54	1668.54	1671	1670.38	1671.23	1675.38
136	PEV (Pre-Erythrocytic Vaccine)	3	0.5	2	100	Infants	6, 10, &, 14 weeks	None	0.893855	0.95	0.97	0.97	NA	NA	5-17mo	0 yrs	None	0.89	0.95	0.97	0.97	NA	NA	None	NA	NA	NA	NA	NA	NA	NA	NA	0.55	Deaths per 100,000 population	332.308	354.769	338	345.692	349.462	357.308	368.231	364.769	373.154	367.538	368.462	365.385	375.462	367	366.923
136	PEV (Pre-Erythrocytic Vaccine)	3	0.5	2	100	Infants	6, 10, &, 14 weeks	None	0.893855	0.95	0.97	0.97	NA	NA	5-17mo	0 yrs	None	0.89	0.95	0.97	0.97	NA	NA	None	NA	NA	NA	NA	NA	NA	NA	NA	0.55	Cases in <5yo per 100,000 population	49320.8	48408.3	48885.2	49785.2	50188.7	50362.7	50541.3	50519.8	50489.9	50630.3	50549.5	50563.2	50560.1	50567.2	50487.9
136	PEV (Pre-Erythrocytic Vaccine)	3	0.5	2	100	Infants	6, 10, &, 14 weeks	None	0.893855	0.95	0.97	0.97	NA	NA	5-17mo	0 yrs	None	0.89	0.95	0.97	0.97	NA	NA	None	NA	NA	NA	NA	NA	NA	NA	NA	0.55	Severe Cases in <5yo per 100,000 population	1279.08	1336.92	1411.15	1446.38	1488.92	1490.77	1518.31	1505.85	1506.69	1503.08	1501.23	1494.54	1499.08	1500.54	1511.31
136	PEV (Pre-Erythrocytic Vaccine)	3	0.5	2	100	Infants	6, 10, &, 14 weeks	None	0.893855	0.95	0.97	0.97	NA	NA	5-17mo	0 yrs	None	0.89	0.95	0.97	0.97	NA	NA	None	NA	NA	NA	NA	NA	NA	NA	NA	0.55	Deaths in < 5yo per 100,000 population	303.308	323.154	308.308	315.385	317	322	330.692	323.385	329.154	324.231	325.077	322.231	330.923	326	324.769
136	PEV (Pre-Erythrocytic Vaccine)	3	0.5	2	100	Infants	6, 10, &, 14 weeks	None	0.893855	0.95	0.97	0.97	NA	NA	5-17mo	0 yrs	None	0.89	0.95	0.97	0.97	NA	NA	None	NA	NA	NA	NA	NA	NA	NA	NA	0.55	DALYs per 100,000 population	8971.11	9549.23	9123.78	9367.63	9459.08	9685.76	9965.48	9854.64	10095.6	9937.36	9967.5	9899.33	10153.1	9927.36	9944.94
136	PEV (Pre-Erythrocytic Vaccine)	3	0.5	2	100	Infants	6, 10, &, 14 weeks	None	0.893855	0.95	0.97	0.97	NA	NA	5-17mo	0 yrs	None	0.89	0.95	0.97	0.97	NA	NA	None	NA	NA	NA	NA	NA	NA	NA	NA	0.55	Income and productivity gains from delivering vaccine (US$ / dose)	0.356584	0.595201	0.500993	0.337471	0.0539664	-0.174563	-0.417317	-0.656766	-0.781463	-0.922516	-1.02874	-1.08801	-1.1705	-1.1765	-1.21207
137	PEV (Pre-Erythrocytic Vaccine)	3	0.5	2	100	Infants	6, 10, &, 14 weeks	None	0.893855	0.95	0.97	0.97	NA	NA	5-17mo	0 yrs	None	0.7	0.81	0.93	0.93	NA	NA	None	NA	NA	NA	NA	NA	NA	NA	NA	0.55	Cases per 100,000 population	108206	107202	107707	108607	109844	111003	112060	112903	113808	114239	114869	115179	115455	115645	115913
137	PEV (Pre-Erythrocytic Vaccine)	3	0.5	2	100	Infants	6, 10, &, 14 weeks	None	0.893855	0.95	0.97	0.97	NA	NA	5-17mo	0 yrs	None	0.7	0.81	0.93	0.93	NA	NA	None	NA	NA	NA	NA	NA	NA	NA	NA	0.55	Severe Cases per 100,000 population	1406.62	1433	1504.46	1586.62	1599.77	1642	1674.54	1660.15	1676.77	1677.15	1675.54	1656.77	1674.54	1646.85	1656.85
137	PEV (Pre-Erythrocytic Vaccine)	3	0.5	2	100	Infants	6, 10, &, 14 weeks	None	0.893855	0.95	0.97	0.97	NA	NA	5-17mo	0 yrs	None	0.7	0.81	0.93	0.93	NA	NA	None	NA	NA	NA	NA	NA	NA	NA	NA	0.55	Deaths per 100,000 population	342.077	336.692	357.615	364.462	350.615	363.308	366.462	366.231	367.462	363.462	369.231	365.769	367.231	372.231	367.846
137	PEV (Pre-Erythrocytic Vaccine)	3	0.5	2	100	Infants	6, 10, &, 14 weeks	None	0.893855	0.95	0.97	0.97	NA	NA	5-17mo	0 yrs	None	0.7	0.81	0.93	0.93	NA	NA	None	NA	NA	NA	NA	NA	NA	NA	NA	0.55	Cases in <5yo per 100,000 population	49555.8	48460	48929.8	49833.4	50144.4	50502.2	50441.2	50504.7	50488.7	50462.9	50466.9	50536.5	50547.5	50587.8	50697.6
137	PEV (Pre-Erythrocytic Vaccine)	3	0.5	2	100	Infants	6, 10, &, 14 weeks	None	0.893855	0.95	0.97	0.97	NA	NA	5-17mo	0 yrs	None	0.7	0.81	0.93	0.93	NA	NA	None	NA	NA	NA	NA	NA	NA	NA	NA	0.55	Severe Cases in <5yo per 100,000 population	1290	1315.92	1387.92	1469.38	1471.15	1496.92	1517.31	1492.23	1515.38	1508.54	1506.69	1488.31	1506.23	1480.54	1492.77
137	PEV (Pre-Erythrocytic Vaccine)	3	0.5	2	100	Infants	6, 10, &, 14 weeks	None	0.893855	0.95	0.97	0.97	NA	NA	5-17mo	0 yrs	None	0.7	0.81	0.93	0.93	NA	NA	None	NA	NA	NA	NA	NA	NA	NA	NA	0.55	Deaths in < 5yo per 100,000 population	311.385	304.769	325.231	331.077	317.231	325.615	327.846	328.692	328.769	324	330.538	326.846	327.231	330	326.231
137	PEV (Pre-Erythrocytic Vaccine)	3	0.5	2	100	Infants	6, 10, &, 14 weeks	None	0.893855	0.95	0.97	0.97	NA	NA	5-17mo	0 yrs	None	0.7	0.81	0.93	0.93	NA	NA	None	NA	NA	NA	NA	NA	NA	NA	NA	0.55	DALYs per 100,000 population	9192.8	9098.22	9646.57	9833.29	9479.46	9809.77	9873.04	9902.52	9921.29	9820.56	9995.72	9893.01	9932.63	10059.8	9940.07
137	PEV (Pre-Erythrocytic Vaccine)	3	0.5	2	100	Infants	6, 10, &, 14 weeks	None	0.893855	0.95	0.97	0.97	NA	NA	5-17mo	0 yrs	None	0.7	0.81	0.93	0.93	NA	NA	None	NA	NA	NA	NA	NA	NA	NA	NA	0.55	Income and productivity gains from delivering vaccine (US$ / dose)	0.338091	0.577858	0.474066	0.348931	0.0793309	-0.160658	-0.408549	-0.585567	-0.800067	-0.908606	-1.0349	-1.09602	-1.16774	-1.17977	-1.23674
138	PEV (Pre-Erythrocytic Vaccine)	3	0.5	2	100	Infants	6, 10, &, 14 weeks	None	0.893855	0.95	0.97	0.97	NA	NA	5-17mo	0 yrs	None	0.5	0.69	0.85	0.85	NA	NA	None	NA	NA	NA	NA	NA	NA	NA	NA	0.55	Cases per 100,000 population	108402	107099	107810	108687	109516	110775	111908	112878	113523	114332	114545	115110	115332	115429	115662
138	PEV (Pre-Erythrocytic Vaccine)	3	0.5	2	100	Infants	6, 10, &, 14 weeks	None	0.893855	0.95	0.97	0.97	NA	NA	5-17mo	0 yrs	None	0.5	0.69	0.85	0.85	NA	NA	None	NA	NA	NA	NA	NA	NA	NA	NA	0.55	Severe Cases per 100,000 population	1405.75	1433.58	1521	1580.58	1613.08	1634.75	1649.83	1654.25	1669.42	1683.67	1658.67	1672.33	1656.08	1640.92	1672
138	PEV (Pre-Erythrocytic Vaccine)	3	0.5	2	100	Infants	6, 10, &, 14 weeks	None	0.893855	0.95	0.97	0.97	NA	NA	5-17mo	0 yrs	None	0.5	0.69	0.85	0.85	NA	NA	None	NA	NA	NA	NA	NA	NA	NA	NA	0.55	Deaths per 100,000 population	335.833	338.167	357.167	354.583	355.417	352.75	365.417	356.167	371.833	367.25	364.583	368.25	364.083	355.417	361.667
138	PEV (Pre-Erythrocytic Vaccine)	3	0.5	2	100	Infants	6, 10, &, 14 weeks	None	0.893855	0.95	0.97	0.97	NA	NA	5-17mo	0 yrs	None	0.5	0.69	0.85	0.85	NA	NA	None	NA	NA	NA	NA	NA	NA	NA	NA	0.55	Cases in <5yo per 100,000 population	49847.8	48538.2	49060.9	49812.8	50060.8	50366.6	50438.4	50480.7	50584.1	50515	50391.8	50531.1	50580.8	50483.2	50619.7
138	PEV (Pre-Erythrocytic Vaccine)	3	0.5	2	100	Infants	6, 10, &, 14 weeks	None	0.893855	0.95	0.97	0.97	NA	NA	5-17mo	0 yrs	None	0.5	0.69	0.85	0.85	NA	NA	None	NA	NA	NA	NA	NA	NA	NA	NA	0.55	Severe Cases in <5yo per 100,000 population	1290.5	1322.5	1403.5	1457.42	1482.5	1489.67	1491.42	1492.92	1507.42	1513.58	1492.67	1508.42	1487.33	1482.92	1504.08
138	PEV (Pre-Erythrocytic Vaccine)	3	0.5	2	100	Infants	6, 10, &, 14 weeks	None	0.893855	0.95	0.97	0.97	NA	NA	5-17mo	0 yrs	None	0.5	0.69	0.85	0.85	NA	NA	None	NA	NA	NA	NA	NA	NA	NA	NA	0.55	Deaths in < 5yo per 100,000 population	305.75	306.583	326.083	323.083	320.25	321.833	327.083	317.583	329.333	326.75	322.083	329.333	322.583	315.75	322.917
138	PEV (Pre-Erythrocytic Vaccine)	3	0.5	2	100	Infants	6, 10, &, 14 weeks	None	0.893855	0.95	0.97	0.97	NA	NA	5-17mo	0 yrs	None	0.5	0.69	0.85	0.85	NA	NA	None	NA	NA	NA	NA	NA	NA	NA	NA	0.55	DALYs per 100,000 population	9050.69	9104.25	9628.53	9588.06	9606.45	9532.36	9885.64	9618.17	10028.4	9926.69	9854.01	9954.4	9849.68	9627.44	9777.15
138	PEV (Pre-Erythrocytic Vaccine)	3	0.5	2	100	Infants	6, 10, &, 14 weeks	None	0.893855	0.95	0.97	0.97	NA	NA	5-17mo	0 yrs	None	0.5	0.69	0.85	0.85	NA	NA	None	NA	NA	NA	NA	NA	NA	NA	NA	0.55	Income and productivity gains from delivering vaccine (US$ / dose)	0.34995	0.609201	0.461696	0.318873	0.145917	-0.120864	-0.360994	-0.584552	-0.72448	-0.92888	-0.961526	-1.09501	-1.12364	-1.14469	-1.20109
139	PEV (Pre-Erythrocytic Vaccine)	3	0.5	2	100	Infants	6, 10, &, 14 weeks	None	0.700569	0.81	0.93	0.93	NA	NA	5-17mo	0 yrs	None	0.89	0.95	0.97	0.97	NA	NA	None	NA	NA	NA	NA	NA	NA	NA	NA	0.55	Cases per 100,000 population	108248	107740	108588	109588	110561	111653	112426	113008	113792	114054	114366	114650	114784	114836	115104
139	PEV (Pre-Erythrocytic Vaccine)	3	0.5	2	100	Infants	6, 10, &, 14 weeks	None	0.700569	0.81	0.93	0.93	NA	NA	5-17mo	0 yrs	None	0.89	0.95	0.97	0.97	NA	NA	None	NA	NA	NA	NA	NA	NA	NA	NA	0.55	Severe Cases per 100,000 population	1382.54	1455	1548.92	1595.85	1605.69	1620.77	1649.77	1633.54	1632.54	1638.54	1640.54	1665.23	1640.38	1651	1641.77
139	PEV (Pre-Erythrocytic Vaccine)	3	0.5	2	100	Infants	6, 10, &, 14 weeks	None	0.700569	0.81	0.93	0.93	NA	NA	5-17mo	0 yrs	None	0.89	0.95	0.97	0.97	NA	NA	None	NA	NA	NA	NA	NA	NA	NA	NA	0.55	Deaths per 100,000 population	328.769	335.846	349.154	363.692	361.615	360.538	367.615	370.385	370.308	369.462	363.538	368.769	360.154	377.615	365.154
139	PEV (Pre-Erythrocytic Vaccine)	3	0.5	2	100	Infants	6, 10, &, 14 weeks	None	0.700569	0.81	0.93	0.93	NA	NA	5-17mo	0 yrs	None	0.89	0.95	0.97	0.97	NA	NA	None	NA	NA	NA	NA	NA	NA	NA	NA	0.55	Cases in <5yo per 100,000 population	49522.4	48970.2	49767	50636.2	50875.2	51010.9	51023.4	50865.7	51092.5	50959	51079.8	51032.3	50964.3	50980.9	51101.2
139	PEV (Pre-Erythrocytic Vaccine)	3	0.5	2	100	Infants	6, 10, &, 14 weeks	None	0.700569	0.81	0.93	0.93	NA	NA	5-17mo	0 yrs	None	0.89	0.95	0.97	0.97	NA	NA	None	NA	NA	NA	NA	NA	NA	NA	NA	0.55	Severe Cases in <5yo per 100,000 population	1267.31	1339.15	1429.31	1471.69	1471.46	1477.31	1499.46	1475.69	1479.46	1477.08	1478.08	1506.85	1480.15	1492.92	1484.31
139	PEV (Pre-Erythrocytic Vaccine)	3	0.5	2	100	Infants	6, 10, &, 14 weeks	None	0.700569	0.81	0.93	0.93	NA	NA	5-17mo	0 yrs	None	0.89	0.95	0.97	0.97	NA	NA	None	NA	NA	NA	NA	NA	NA	NA	NA	0.55	Deaths in < 5yo per 100,000 population	301.308	305.077	318.923	332.308	327.615	325.538	329.769	332.231	329	332.308	327.923	327.692	320.846	338.462	326
139	PEV (Pre-Erythrocytic Vaccine)	3	0.5	2	100	Infants	6, 10, &, 14 weeks	None	0.700569	0.81	0.93	0.93	NA	NA	5-17mo	0 yrs	None	0.89	0.95	0.97	0.97	NA	NA	None	NA	NA	NA	NA	NA	NA	NA	NA	0.55	DALYs per 100,000 population	8882.88	9093.5	9441.05	9819.49	9788.54	9737.23	9924.37	10007.2	10004.2	9965.9	9819.07	9946.93	9735.66	10187.4	9894.59
139	PEV (Pre-Erythrocytic Vaccine)	3	0.5	2	100	Infants	6, 10, &, 14 weeks	None	0.700569	0.81	0.93	0.93	NA	NA	5-17mo	0 yrs	None	0.89	0.95	0.97	0.97	NA	NA	None	NA	NA	NA	NA	NA	NA	NA	NA	0.55	Income and productivity gains from delivering vaccine (US$ / dose)	0.369641	0.612764	0.436609	0.244524	0.00119134	-0.280788	-0.505379	-0.689248	-0.861239	-0.959232	-1.01671	-1.12112	-1.14647	-1.15464	-1.21111
140	PEV (Pre-Erythrocytic Vaccine)	3	0.5	2	100	Infants	6, 10, &, 14 weeks	None	0.700569	0.81	0.93	0.93	NA	NA	5-17mo	0 yrs	None	0.7	0.81	0.93	0.93	NA	NA	None	NA	NA	NA	NA	NA	NA	NA	NA	0.55	Cases per 100,000 population	108384	107690	108479	109517	110526	111532	112510	112942	113661	113940	114248	114573	114678	114777	115085
140	PEV (Pre-Erythrocytic Vaccine)	3	0.5	2	100	Infants	6, 10, &, 14 weeks	None	0.700569	0.81	0.93	0.93	NA	NA	5-17mo	0 yrs	None	0.7	0.81	0.93	0.93	NA	NA	None	NA	NA	NA	NA	NA	NA	NA	NA	0.55	Severe Cases per 100,000 population	1401.62	1462.08	1546.38	1589.62	1600.23	1606.15	1618.85	1619.08	1638.46	1644.77	1639.69	1633.08	1647.92	1623.08	1641.23
140	PEV (Pre-Erythrocytic Vaccine)	3	0.5	2	100	Infants	6, 10, &, 14 weeks	None	0.700569	0.81	0.93	0.93	NA	NA	5-17mo	0 yrs	None	0.7	0.81	0.93	0.93	NA	NA	None	NA	NA	NA	NA	NA	NA	NA	NA	0.55	Deaths per 100,000 population	337.308	337.846	349	359.538	367.231	368.846	356.231	360.462	373.231	367	369.308	363.769	366.077	365.385	369.462
140	PEV (Pre-Erythrocytic Vaccine)	3	0.5	2	100	Infants	6, 10, &, 14 weeks	None	0.700569	0.81	0.93	0.93	NA	NA	5-17mo	0 yrs	None	0.7	0.81	0.93	0.93	NA	NA	None	NA	NA	NA	NA	NA	NA	NA	NA	0.55	Cases in <5yo per 100,000 population	49769.7	49041.3	49666.2	50608.1	50850.4	51045.8	51112.6	50934.2	51025.5	50972.5	50994.9	50977.9	50979.6	51031.2	51119.8
140	PEV (Pre-Erythrocytic Vaccine)	3	0.5	2	100	Infants	6, 10, &, 14 weeks	None	0.700569	0.81	0.93	0.93	NA	NA	5-17mo	0 yrs	None	0.7	0.81	0.93	0.93	NA	NA	None	NA	NA	NA	NA	NA	NA	NA	NA	0.55	Severe Cases in <5yo per 100,000 population	1285.15	1347.54	1428.69	1471.62	1465.77	1467.77	1472.54	1471.23	1478	1491.15	1487.85	1471.31	1483.38	1462.85	1484.77
140	PEV (Pre-Erythrocytic Vaccine)	3	0.5	2	100	Infants	6, 10, &, 14 weeks	None	0.700569	0.81	0.93	0.93	NA	NA	5-17mo	0 yrs	None	0.7	0.81	0.93	0.93	NA	NA	None	NA	NA	NA	NA	NA	NA	NA	NA	0.55	Deaths in < 5yo per 100,000 population	307.308	308.538	318.462	328	331.769	331.538	321.154	322.615	333.462	326.385	331.769	325.615	326.231	326.538	332.077
140	PEV (Pre-Erythrocytic Vaccine)	3	0.5	2	100	Infants	6, 10, &, 14 weeks	None	0.700569	0.81	0.93	0.93	NA	NA	5-17mo	0 yrs	None	0.7	0.81	0.93	0.93	NA	NA	None	NA	NA	NA	NA	NA	NA	NA	NA	0.55	DALYs per 100,000 population	9097.25	9094.03	9417.93	9680.95	9907.66	9961.03	9637.64	9731.09	10093.9	9912.81	9982.73	9845.83	9907.24	9842.59	9972.24
140	PEV (Pre-Erythrocytic Vaccine)	3	0.5	2	100	Infants	6, 10, &, 14 weeks	None	0.700569	0.81	0.93	0.93	NA	NA	5-17mo	0 yrs	None	0.7	0.81	0.93	0.93	NA	NA	None	NA	NA	NA	NA	NA	NA	NA	NA	0.55	Income and productivity gains from delivering vaccine (US$ / dose)	0.371496	0.621512	0.442623	0.279837	0.0204906	-0.237677	-0.491032	-0.649008	-0.826072	-0.914488	-0.995721	-1.08975	-1.12475	-1.12803	-1.21127
141	PEV (Pre-Erythrocytic Vaccine)	3	0.5	2	100	Infants	6, 10, &, 14 weeks	None	0.700569	0.81	0.93	0.93	NA	NA	5-17mo	0 yrs	None	0.5	0.69	0.85	0.85	NA	NA	None	NA	NA	NA	NA	NA	NA	NA	NA	0.55	Cases per 100,000 population	108847	107982	108647	109478	110506	111456	112138	112914	113505	114088	114336	114545	114956	114835	115154
141	PEV (Pre-Erythrocytic Vaccine)	3	0.5	2	100	Infants	6, 10, &, 14 weeks	None	0.700569	0.81	0.93	0.93	NA	NA	5-17mo	0 yrs	None	0.5	0.69	0.85	0.85	NA	NA	None	NA	NA	NA	NA	NA	NA	NA	NA	0.55	Severe Cases per 100,000 population	1393.2	1455.2	1526.8	1591	1597.13	1617.93	1620.4	1633.53	1639.8	1657.6	1625.8	1645.2	1639	1634.33	1631.07
141	PEV (Pre-Erythrocytic Vaccine)	3	0.5	2	100	Infants	6, 10, &, 14 weeks	None	0.700569	0.81	0.93	0.93	NA	NA	5-17mo	0 yrs	None	0.5	0.69	0.85	0.85	NA	NA	None	NA	NA	NA	NA	NA	NA	NA	NA	0.55	Deaths per 100,000 population	349.333	345.6	346	367.8	353.933	360.667	360.933	371.933	371.067	375.2	370.4	361.6	360.933	366.733	365.6
141	PEV (Pre-Erythrocytic Vaccine)	3	0.5	2	100	Infants	6, 10, &, 14 weeks	None	0.700569	0.81	0.93	0.93	NA	NA	5-17mo	0 yrs	None	0.5	0.69	0.85	0.85	NA	NA	None	NA	NA	NA	NA	NA	NA	NA	NA	0.55	Cases in <5yo per 100,000 population	50053.5	49272.1	49799.9	50546.5	50792.3	50997.5	50931.9	51008	51036.4	51017.3	50955.9	50945.7	51033.5	51021.2	51000.9
141	PEV (Pre-Erythrocytic Vaccine)	3	0.5	2	100	Infants	6, 10, &, 14 weeks	None	0.700569	0.81	0.93	0.93	NA	NA	5-17mo	0 yrs	None	0.5	0.69	0.85	0.85	NA	NA	None	NA	NA	NA	NA	NA	NA	NA	NA	0.55	Severe Cases in <5yo per 100,000 population	1273.73	1333.4	1413.27	1468.87	1465.13	1478.2	1469.2	1480.53	1481.73	1505.33	1471.47	1489.73	1479.4	1470.73	1472.47
141	PEV (Pre-Erythrocytic Vaccine)	3	0.5	2	100	Infants	6, 10, &, 14 weeks	None	0.700569	0.81	0.93	0.93	NA	NA	5-17mo	0 yrs	None	0.5	0.69	0.85	0.85	NA	NA	None	NA	NA	NA	NA	NA	NA	NA	NA	0.55	Deaths in < 5yo per 100,000 population	318.467	314.067	314.867	334.8	319.267	322.733	325.2	334.533	331	335.067	330.467	324.933	322.467	325	326.867
141	PEV (Pre-Erythrocytic Vaccine)	3	0.5	2	100	Infants	6, 10, &, 14 weeks	None	0.700569	0.81	0.93	0.93	NA	NA	5-17mo	0 yrs	None	0.5	0.69	0.85	0.85	NA	NA	None	NA	NA	NA	NA	NA	NA	NA	NA	0.55	DALYs per 100,000 population	9423.96	9326.46	9345.13	9894.73	9534.51	9737.38	9753.59	10053.6	10043.1	10139.6	9995.56	9754.97	9743.96	9918.74	9884.22
141	PEV (Pre-Erythrocytic Vaccine)	3	0.5	2	100	Infants	6, 10, &, 14 weeks	None	0.700569	0.81	0.93	0.93	NA	NA	5-17mo	0 yrs	None	0.5	0.69	0.85	0.85	NA	NA	None	NA	NA	NA	NA	NA	NA	NA	NA	0.55	Income and productivity gains from delivering vaccine (US$ / dose)	0.336495	0.581538	0.434063	0.277341	0.0253458	-0.221076	-0.417168	-0.632002	-0.794638	-0.965443	-1.01931	-1.0954	-1.18449	-1.15649	-1.23669
142	PEV (Pre-Erythrocytic Vaccine)	3	0.5	2	100	Infants	6, 10, &, 14 weeks	None	0.498525	0.69	0.85	0.85	NA	NA	5-17mo	0 yrs	None	0.89	0.95	0.97	0.97	NA	NA	None	NA	NA	NA	NA	NA	NA	NA	NA	0.55	Cases per 100,000 population	108457	108366	109455	110295	111090	111897	112629	113000	113584	113756	114000	114070	114173	114351	114462
142	PEV (Pre-Erythrocytic Vaccine)	3	0.5	2	100	Infants	6, 10, &, 14 weeks	None	0.498525	0.69	0.85	0.85	NA	NA	5-17mo	0 yrs	None	0.89	0.95	0.97	0.97	NA	NA	None	NA	NA	NA	NA	NA	NA	NA	NA	0.55	Severe Cases per 100,000 population	1403.86	1473.9	1539.19	1583.62	1603.38	1622.1	1615.9	1614.33	1621.71	1617.48	1626.52	1636.71	1617.86	1611.33	1617.9
142	PEV (Pre-Erythrocytic Vaccine)	3	0.5	2	100	Infants	6, 10, &, 14 weeks	None	0.498525	0.69	0.85	0.85	NA	NA	5-17mo	0 yrs	None	0.89	0.95	0.97	0.97	NA	NA	None	NA	NA	NA	NA	NA	NA	NA	NA	0.55	Deaths per 100,000 population	338.048	351.952	348	353.905	369.571	368.619	365.333	368.238	368.952	358.333	364.857	373.571	368.667	374.429	366.81
142	PEV (Pre-Erythrocytic Vaccine)	3	0.5	2	100	Infants	6, 10, &, 14 weeks	None	0.498525	0.69	0.85	0.85	NA	NA	5-17mo	0 yrs	None	0.89	0.95	0.97	0.97	NA	NA	None	NA	NA	NA	NA	NA	NA	NA	NA	0.55	Cases in <5yo per 100,000 population	49793.9	49616.2	50585	51347.2	51300.2	51436.8	51522.3	51419.5	51568.7	51534.3	51474.9	51502.7	51508.3	51534.3	51539
142	PEV (Pre-Erythrocytic Vaccine)	3	0.5	2	100	Infants	6, 10, &, 14 weeks	None	0.498525	0.69	0.85	0.85	NA	NA	5-17mo	0 yrs	None	0.89	0.95	0.97	0.97	NA	NA	None	NA	NA	NA	NA	NA	NA	NA	NA	0.55	Severe Cases in <5yo per 100,000 population	1285.14	1357.86	1424.57	1468	1469.14	1481.1	1470.67	1465.48	1471.24	1471.29	1474.38	1479.86	1474.86	1465.1	1467.62
142	PEV (Pre-Erythrocytic Vaccine)	3	0.5	2	100	Infants	6, 10, &, 14 weeks	None	0.498525	0.69	0.85	0.85	NA	NA	5-17mo	0 yrs	None	0.89	0.95	0.97	0.97	NA	NA	None	NA	NA	NA	NA	NA	NA	NA	NA	0.55	Deaths in < 5yo per 100,000 population	305.333	319.524	318.381	323.571	335.333	332.381	330.238	332.19	331.048	323.667	326.714	333.952	331	337.524	327.571
142	PEV (Pre-Erythrocytic Vaccine)	3	0.5	2	100	Infants	6, 10, &, 14 weeks	None	0.498525	0.69	0.85	0.85	NA	NA	5-17mo	0 yrs	None	0.89	0.95	0.97	0.97	NA	NA	None	NA	NA	NA	NA	NA	NA	NA	NA	0.55	DALYs per 100,000 population	9133.68	9481.42	9402.27	9558.22	9967.99	9947.13	9871.82	9923.61	9965.32	9683.16	9840.29	10086.9	9941.22	10111	9912.46
142	PEV (Pre-Erythrocytic Vaccine)	3	0.5	2	100	Infants	6, 10, &, 14 weeks	None	0.498525	0.69	0.85	0.85	NA	NA	5-17mo	0 yrs	None	0.89	0.95	0.97	0.97	NA	NA	None	NA	NA	NA	NA	NA	NA	NA	NA	0.55	Income and productivity gains from delivering vaccine (US$ / dose)	0.393912	0.644003	0.394454	0.214429	-0.110177	-0.36614	-0.591409	-0.742556	-0.920543	-0.989208	-1.06284	-1.09487	-1.1271	-1.17717	-1.21151
143	PEV (Pre-Erythrocytic Vaccine)	3	0.5	2	100	Infants	6, 10, &, 14 weeks	None	0.498525	0.69	0.85	0.85	NA	NA	5-17mo	0 yrs	None	0.7	0.81	0.93	0.93	NA	NA	None	NA	NA	NA	NA	NA	NA	NA	NA	0.55	Cases per 100,000 population	108740	108411	109257	110218	111100	111824	112569	113072	113504	113820	113956	114176	114201	114308	114456
143	PEV (Pre-Erythrocytic Vaccine)	3	0.5	2	100	Infants	6, 10, &, 14 weeks	None	0.498525	0.69	0.85	0.85	NA	NA	5-17mo	0 yrs	None	0.7	0.81	0.93	0.93	NA	NA	None	NA	NA	NA	NA	NA	NA	NA	NA	0.55	Severe Cases per 100,000 population	1398.94	1474.12	1547.35	1586.47	1600.06	1629.29	1619	1622.94	1616.71	1615.06	1616.41	1623.53	1612	1601.65	1629.06
143	PEV (Pre-Erythrocytic Vaccine)	3	0.5	2	100	Infants	6, 10, &, 14 weeks	None	0.498525	0.69	0.85	0.85	NA	NA	5-17mo	0 yrs	None	0.7	0.81	0.93	0.93	NA	NA	None	NA	NA	NA	NA	NA	NA	NA	NA	0.55	Deaths per 100,000 population	337.529	350.824	355.235	361.235	370.176	361.588	369.235	374.706	360.412	373.235	365.588	367.647	362.412	363.824	366.118
143	PEV (Pre-Erythrocytic Vaccine)	3	0.5	2	100	Infants	6, 10, &, 14 weeks	None	0.498525	0.69	0.85	0.85	NA	NA	5-17mo	0 yrs	None	0.7	0.81	0.93	0.93	NA	NA	None	NA	NA	NA	NA	NA	NA	NA	NA	0.55	Cases in <5yo per 100,000 population	49985	49719.9	50497.9	51269.8	51382.5	51494.7	51566.7	51508	51535.3	51587.7	51499.9	51553.5	51507.2	51551.9	51489.9
143	PEV (Pre-Erythrocytic Vaccine)	3	0.5	2	100	Infants	6, 10, &, 14 weeks	None	0.498525	0.69	0.85	0.85	NA	NA	5-17mo	0 yrs	None	0.7	0.81	0.93	0.93	NA	NA	None	NA	NA	NA	NA	NA	NA	NA	NA	0.55	Severe Cases in <5yo per 100,000 population	1284.41	1356.59	1431.88	1466.18	1469.88	1491	1478.18	1476.06	1467.59	1466.71	1466.59	1475.71	1465.35	1460.06	1482.65
143	PEV (Pre-Erythrocytic Vaccine)	3	0.5	2	100	Infants	6, 10, &, 14 weeks	None	0.498525	0.69	0.85	0.85	NA	NA	5-17mo	0 yrs	None	0.7	0.81	0.93	0.93	NA	NA	None	NA	NA	NA	NA	NA	NA	NA	NA	0.55	Deaths in < 5yo per 100,000 population	306.706	320.529	322.529	329.529	337.235	326	332.706	336.353	324.765	335.176	326.529	330.588	327.588	324.529	328.765
143	PEV (Pre-Erythrocytic Vaccine)	3	0.5	2	100	Infants	6, 10, &, 14 weeks	None	0.498525	0.69	0.85	0.85	NA	NA	5-17mo	0 yrs	None	0.7	0.81	0.93	0.93	NA	NA	None	NA	NA	NA	NA	NA	NA	NA	NA	0.55	DALYs per 100,000 population	9102.22	9481.82	9579.53	9747.85	9984.6	9769.69	9962.27	10078	9720.6	10070.5	9854.75	9918.46	9793.83	9821.13	9884.32
143	PEV (Pre-Erythrocytic Vaccine)	3	0.5	2	100	Infants	6, 10, &, 14 weeks	None	0.498525	0.69	0.85	0.85	NA	NA	5-17mo	0 yrs	None	0.7	0.81	0.93	0.93	NA	NA	None	NA	NA	NA	NA	NA	NA	NA	NA	0.55	Income and productivity gains from delivering vaccine (US$ / dose)	0.370741	0.664221	0.438279	0.223098	-0.07637	-0.341643	-0.566952	-0.748447	-0.893603	-0.998474	-1.04662	-1.11959	-1.13914	-1.12262	-1.23577
144	PEV (Pre-Erythrocytic Vaccine)	3	0.5	2	100	Infants	6, 10, &, 14 weeks	None	0.498525	0.69	0.85	0.85	NA	NA	5-17mo	0 yrs	None	0.5	0.69	0.85	0.85	NA	NA	None	NA	NA	NA	NA	NA	NA	NA	NA	0.55	Cases per 100,000 population	109235	108682	109554	110170	110993	111917	112517	113028	113430	113659	114006	114111	114248	114391	114486
144	PEV (Pre-Erythrocytic Vaccine)	3	0.5	2	100	Infants	6, 10, &, 14 weeks	None	0.498525	0.69	0.85	0.85	NA	NA	5-17mo	0 yrs	None	0.5	0.69	0.85	0.85	NA	NA	None	NA	NA	NA	NA	NA	NA	NA	NA	0.55	Severe Cases per 100,000 population	1408.87	1478.53	1524.07	1568.33	1615.33	1598.27	1599.47	1634.13	1628.07	1622.07	1614.8	1612.33	1641.67	1622.8	1618.2
144	PEV (Pre-Erythrocytic Vaccine)	3	0.5	2	100	Infants	6, 10, &, 14 weeks	None	0.498525	0.69	0.85	0.85	NA	NA	5-17mo	0 yrs	None	0.5	0.69	0.85	0.85	NA	NA	None	NA	NA	NA	NA	NA	NA	NA	NA	0.55	Deaths per 100,000 population	347.733	356.4	358.133	360.267	367.467	360	369	369.333	366.667	369.733	371.867	368.867	366.733	369.533	371.4
144	PEV (Pre-Erythrocytic Vaccine)	3	0.5	2	100	Infants	6, 10, &, 14 weeks	None	0.498525	0.69	0.85	0.85	NA	NA	5-17mo	0 yrs	None	0.5	0.69	0.85	0.85	NA	NA	None	NA	NA	NA	NA	NA	NA	NA	NA	0.55	Cases in <5yo per 100,000 population	50363.9	49867.5	50575.9	51232.5	51330.5	51557	51541.7	51484.3	51522.1	51488.6	51537.5	51495.9	51529.5	51612.1	51580.1
144	PEV (Pre-Erythrocytic Vaccine)	3	0.5	2	100	Infants	6, 10, &, 14 weeks	None	0.498525	0.69	0.85	0.85	NA	NA	5-17mo	0 yrs	None	0.5	0.69	0.85	0.85	NA	NA	None	NA	NA	NA	NA	NA	NA	NA	NA	0.55	Severe Cases in <5yo per 100,000 population	1290.93	1361.6	1406.93	1450.87	1481.6	1462.33	1457.33	1492.93	1472.07	1472.6	1467.07	1461.27	1487.73	1475.73	1468.6
144	PEV (Pre-Erythrocytic Vaccine)	3	0.5	2	100	Infants	6, 10, &, 14 weeks	None	0.498525	0.69	0.85	0.85	NA	NA	5-17mo	0 yrs	None	0.5	0.69	0.85	0.85	NA	NA	None	NA	NA	NA	NA	NA	NA	NA	NA	0.55	Deaths in < 5yo per 100,000 population	314	324.2	322.467	326.6	332	325	335	333.8	330.333	334.267	335.067	330.733	329.067	334.4	332.2
144	PEV (Pre-Erythrocytic Vaccine)	3	0.5	2	100	Infants	6, 10, &, 14 weeks	None	0.498525	0.69	0.85	0.85	NA	NA	5-17mo	0 yrs	None	0.5	0.69	0.85	0.85	NA	NA	None	NA	NA	NA	NA	NA	NA	NA	NA	0.55	DALYs per 100,000 population	9406.87	9606.9	9673.1	9728.97	9920.84	9747.07	9978.51	9970.41	9908.35	9969.64	10037.2	9951.89	9895.03	9979.09	10030.2
144	PEV (Pre-Erythrocytic Vaccine)	3	0.5	2	100	Infants	6, 10, &, 14 weeks	None	0.498525	0.69	0.85	0.85	NA	NA	5-17mo	0 yrs	None	0.5	0.69	0.85	0.85	NA	NA	None	NA	NA	NA	NA	NA	NA	NA	NA	0.55	Income and productivity gains from delivering vaccine (US$ / dose)	0.336228	0.587412	0.364679	0.261977	-0.0528787	-0.335567	-0.552334	-0.756869	-0.894041	-0.947834	-1.06205	-1.11612	-1.18163	-1.18941	-1.21321
145	PEV (Pre-Erythrocytic Vaccine)	3	0.5	4	0.1	Infants	6, 10, &, 14 weeks	None	0.893855	0.95	0.97	0.97	NA	NA	5-17mo	0 yrs	None	0.89	0.95	0.97	0.97	NA	NA	None	NA	NA	NA	NA	NA	NA	NA	NA	0.55	Cases per 100,000 population	8520.63	8383.55	8333.72	8249.93	8177.45	8158.38	8107.9	8029.25	7910.69	7841.55	7803.49	7749.85	7675.69	7627.75	7657.24
145	PEV (Pre-Erythrocytic Vaccine)	3	0.5	4	0.1	Infants	6, 10, &, 14 weeks	None	0.893855	0.95	0.97	0.97	NA	NA	5-17mo	0 yrs	None	0.89	0.95	0.97	0.97	NA	NA	None	NA	NA	NA	NA	NA	NA	NA	NA	0.55	Severe Cases per 100,000 population	148.427	141.118	140.555	140.164	136.473	137.036	135.591	136.318	134.218	131.236	132.864	131.809	129.9	130.545	133.682
145	PEV (Pre-Erythrocytic Vaccine)	3	0.5	4	0.1	Infants	6, 10, &, 14 weeks	None	0.893855	0.95	0.97	0.97	NA	NA	5-17mo	0 yrs	None	0.89	0.95	0.97	0.97	NA	NA	None	NA	NA	NA	NA	NA	NA	NA	NA	0.55	Deaths per 100,000 population	29.1455	29.3182	30.1273	29.4	28.9909	29.1818	28.4727	28.6545	28.8636	27.9364	27.5	27.6545	26.8818	28.2273	28.3364
[truncated: 50,685 more rows]
[truncated: 5 more columns]
